# Supplementary material for: Transcriptome-based biomarker gene screening and evaluation of the extracellular fatty acid-binding protein (Ex-FABP) on immune and angiogenesis-related genes in chicken erythrocytes of tibial dyschondroplasia
Source: BMC Genomics. 2022 Apr 22;23:323. doi: 10.1186/s12864-022-08494-9 (PMC9034513; doi:10.1186/s12864-022-08494-9)
Supplement: Supplementary file 1 — Additional file 1. [file 12864_2022_8494_MOESM1_ESM.xlsx]

## Sheet: T6 vs T2
Additional file 1. Differentially expressed genes under likelihood ratio test
	GeneID	baseMean	log2FoldChange	lfcSE	stat	pvalue	padj	deg_status
1	ENSGALG00000000206	70.1972	-0.961249	0.55201	17.3983	0.000166728	0.0195778	Down
2	ENSGALG00000000558	6.04008	-7.31485	2.1511	16.8526	0.000219028	0.0234488	Down
3	ENSGALG00000000562	63.2295	-1.68845	0.679235	18.8276	8.15894e-05	0.0123713	Down
4	ENSGALG00000000577	1402.45	0.0986971	0.156957	13.8956	0.000960747	0.0577453	Up
5	ENSGALG00000000589	7740.34	0.448785	0.266682	25.499	2.90379e-06	0.00107343	Up
6	ENSGALG00000000694	99.5129	-1.8017	0.680716	13.0637	0.00145629	0.0730413	Down
7	ENSGALG00000000834	22.5316	-2.06007	0.84154	15.7151	0.000386816	0.0332828	Down
8	ENSGALG00000000878	11.69	-2.0696	1.22923	14.1174	0.000859903	0.0556852	Down
9	ENSGALG00000001163	1221.49	0.233353	0.283513	18.9285	7.75773e-05	0.0122905	Up
10	ENSGALG00000001209	1027.36	0.714975	0.267957	13.0055	0.00149934	0.0744522	Up
11	ENSGALG00000001226	25.4111	-1.39758	0.985379	12.2863	0.0021481	0.0953604	Down
12	ENSGALG00000001329	23640.5	0.115367	0.259415	15.6519	0.000399238	0.0334857	Up
13	ENSGALG00000001342	43.1733	1.6704	0.811475	15.375	0.000458523	0.0358817	Up
14	ENSGALG00000001491	49.3601	-2.55404	0.518065	33.0722	6.58353e-08	4.69359e-05	Down
15	ENSGALG00000001571	71.6505	-1.4859	0.645075	19.1431	6.96837e-05	0.011218	Down
16	ENSGALG00000001589	41.7111	-3.45739	1.01566	17.1788	0.000186067	0.0213464	Down
17	ENSGALG00000001886	580.632	-1.36844	0.596019	13.1024	0.00142839	0.0727581	Down
18	ENSGALG00000001898	21241.3	0.463502	0.210887	23.8427	6.64698e-06	0.00187837	Up
19	ENSGALG00000001945	397.525	-1.44828	0.431455	11.9946	0.00248545	0.0996278	Down
20	ENSGALG00000002016	5.52396	-2.41683	1.70153	12.8234	0.00164227	0.079186	Down
21	ENSGALG00000002043	3108.37	0.0615329	0.249855	18.1926	0.000112079	0.0149155	Up
22	ENSGALG00000002080	15.1357	-2.44423	1.27863	19.1595	6.91145e-05	0.011218	Down
23	ENSGALG00000002192	83.788	-2.22034	0.82808	16.8362	0.000220838	0.0234488	Down
24	ENSGALG00000002227	1549.24	-0.265721	0.353247	13.0164	0.00149118	0.0744174	Down
25	ENSGALG00000002260	4992.36	0.561538	0.672894	24.9588	3.80425e-06	0.00122485	Up
26	ENSGALG00000002286	4324.48	0.444065	0.373712	13.5061	0.00116732	0.0658252	Up
27	ENSGALG00000002347	2556.7	0.114691	0.445192	13.9578	0.000931323	0.0570278	Up
28	ENSGALG00000002559	370.729	-0.790115	0.520652	13.0917	0.00143606	0.0727581	Down
29	ENSGALG00000002771	40.3499	-2.88064	0.803407	23.0087	1.0086e-05	0.00258123	Down
30	ENSGALG00000003205	2419.48	0.226342	0.316942	15.3384	0.000466994	0.0361323	Up
31	ENSGALG00000003277	243.293	-1.4168	0.321823	20.0217	4.4909e-05	0.00836358	Down
32	ENSGALG00000003294	26.0019	-3.64141	0.847714	22.3388	1.40992e-05	0.00335056	Down
33	ENSGALG00000003433	188.201	1.05823	0.509724	19.2041	6.75913e-05	0.011218	Up
34	ENSGALG00000003527	20717.7	0.538471	0.309971	14.1061	0.000864763	0.0556852	Up
35	ENSGALG00000003578	279.464	-2.64925	0.880605	17.0248	0.000200962	0.022537	Down
36	ENSGALG00000003863	16.1871	-6.21301	1.9058	14.1781	0.000834209	0.0547779	Down
37	ENSGALG00000003939	93.6528	-3.01821	0.923402	18.33	0.000104637	0.0141775	Down
38	ENSGALG00000003951	35.4856	-2.19725	0.908124	14.8854	0.000585694	0.0429839	Down
39	ENSGALG00000004001	3588.95	0.742551	0.249401	14.4237	0.000737781	0.0504369	Up
40	ENSGALG00000004004	160.54	-0.859331	0.436839	13.3762	0.00124563	0.0675687	Down
41	ENSGALG00000004153	2279.26	0.387012	0.185166	12.9716	0.00152496	0.0749784	Up
42	ENSGALG00000004162	1293.41	0.444614	0.349027	14.9328	0.000571975	0.0429239	Up
43	ENSGALG00000004170	4279.26	0.120734	0.338602	24.74	4.24407e-06	0.00132375	Up
44	ENSGALG00000004284	13.8773	-3.68641	1.19629	20.0066	4.52493e-05	0.00836358	Down
45	ENSGALG00000004414	10.6366	-6.21767	1.88145	12.2382	0.00220044	0.0957518	Down
46	ENSGALG00000004610	13073.6	-0.0476431	0.317837	11.999	0.00247995	0.0996278	Down
47	ENSGALG00000005031	4.21231	-6.01475	2.74978	15.3679	0.000460161	0.0358817	Down
48	ENSGALG00000005038	10.7668	-6.17525	2.08312	12.8739	0.00160128	0.0783449	Down
49	ENSGALG00000005227	147.244	1.24397	0.289725	21.7246	1.91677e-05	0.0040705	Up
50	ENSGALG00000005302	345.643	-0.986256	0.32148	12.1579	0.00229058	0.0968741	Down
51	ENSGALG00000005309	33.0201	-2.13562	0.620167	15.62	0.000405666	0.0337413	Down
52	ENSGALG00000005512	11009	0.207482	0.290539	16.2025	0.000303159	0.0285455	Up
53	ENSGALG00000005642	10.3963	-2.31286	1.01038	14.6359	0.000663516	0.0477398	Down
54	ENSGALG00000005644	36.2777	-2.73878	1.02857	13.4828	0.00118097	0.0658509	Down
55	ENSGALG00000005656	372.146	0.186156	0.687249	13.144	0.00139897	0.0723478	Up
56	ENSGALG00000005725	35.328	-2.68795	0.785435	18.321	0.000105113	0.0141775	Down
57	ENSGALG00000005820	55.9461	-2.04497	0.878958	12.2388	0.00219976	0.0957518	Down
58	ENSGALG00000005849	627.022	0.423698	0.680756	15.418	0.000448764	0.0357069	Up
59	ENSGALG00000005868	6765.49	0.401741	0.362576	13.9159	0.000951046	0.0577453	Up
60	ENSGALG00000006123	41.2849	-2.8245	0.79041	21.8634	1.78825e-05	0.00396635	Down
61	ENSGALG00000006211	16307.9	0.0332502	0.335365	18.68	8.7841e-05	0.0128933	Up
62	ENSGALG00000006323	32.4625	4.6816	1.23667	20.5577	3.43513e-05	0.00672275	Up
63	ENSGALG00000006583	64.391	-1.70417	0.549815	27.1191	1.29169e-06	0.000566654	Down
64	ENSGALG00000006630	322.964	-0.371658	0.432723	15.6604	0.000397552	0.0334857	Down
65	ENSGALG00000006644	260.48	0.529622	0.703997	14.8905	0.000584202	0.0429839	Up
66	ENSGALG00000006775	1181.86	0.134433	0.516721	15.5783	0.000414215	0.0338875	Up
67	ENSGALG00000006862	4209.21	0.717305	0.284268	13.2256	0.00134304	0.0705521	Up
68	ENSGALG00000006897	670.529	0.626677	0.498765	15.1628	0.000509859	0.0391454	Up
69	ENSGALG00000006992	307.943	0.104414	0.618324	13.1004	0.00142982	0.0727581	Up
70	ENSGALG00000007053	7.96158	-7.21927	1.99269	13.6769	0.00107175	0.0621928	Down
71	ENSGALG00000007128	116.471	-2.13035	0.7923	12.2424	0.00219583	0.0957518	Down
72	ENSGALG00000007210	3753.43	-0.00566606	0.32188	15.9223	0.000348747	0.0313589	Down
73	ENSGALG00000007355	2659.21	0.0597292	0.37582	22.8376	1.09868e-05	0.00274149	Up
74	ENSGALG00000007416	42.1251	-2.39525	1.13591	12.0484	0.00241953	0.0983132	Down
75	ENSGALG00000007463	404337	0.253725	0.419927	14.89	0.000584369	0.0429839	Up
76	ENSGALG00000007511	84.1843	-1.07136	0.625157	21.3756	2.2822e-05	0.00474555	Down
77	ENSGALG00000007531	1738.53	-0.00285022	0.247414	17.9972	0.000123585	0.0158142	Down
78	ENSGALG00000007728	5559.08	0.020908	0.283893	12.5128	0.00191817	0.0882268	Up
79	ENSGALG00000007768	39.5351	-2.60274	0.656078	15.775	0.000375415	0.0325827	Down
80	ENSGALG00000007849	36.2884	-2.85963	0.709576	23.2764	8.8224e-06	0.00231727	Down
81	ENSGALG00000007966	1635.08	0.923678	0.411075	12.0581	0.00240773	0.0983132	Up
82	ENSGALG00000007973	1716.82	0.306315	0.22164	16.3436	0.000282508	0.0273758	Up
83	ENSGALG00000008013	1266.44	0.0783201	0.14296	12.2495	0.002188	0.0957518	Up
84	ENSGALG00000008023	360.61	0.356059	0.310493	14.3074	0.000781959	0.0523807	Up
85	ENSGALG00000008074	1627.63	0.606776	0.297162	12.9906	0.00151053	0.0746365	Up
86	ENSGALG00000008127	19.188	-2.50303	0.880667	12.4652	0.00196429	0.0899339	Down
87	ENSGALG00000008217	14.7998	0.564685	0.744928	13.1693	0.00138142	0.0718546	Up
88	ENSGALG00000008256	385.103	-1.45564	0.414422	13.0669	0.00145397	0.0730413	Down
89	ENSGALG00000008325	1111.88	-0.661244	0.185532	21.3317	2.33283e-05	0.00475184	Down
90	ENSGALG00000008408	1147.81	0.758289	0.719381	16.4828	0.000263511	0.026301	Up
91	ENSGALG00000008431	421.866	-0.625406	0.618843	19.7437	5.16071e-05	0.00922081	Down
92	ENSGALG00000008445	8.46701	-4.03368	1.75482	16.513	0.000259572	0.026301	Down
93	ENSGALG00000008600	67.0608	-2.30874	0.753661	12.5951	0.00184082	0.0862592	Down
94	ENSGALG00000008677	11412.5	0.363868	0.287131	19.7388	5.17348e-05	0.00922081	Up
95	ENSGALG00000008930	5.68316	-2.79622	1.45252	12.1602	0.00228798	0.0968741	Down
96	ENSGALG00000008949	5432.19	0.272975	0.262176	20.2831	3.94075e-05	0.00756397	Up
97	ENSGALG00000008970	68.2642	-2.07376	0.921214	16.67	0.00023997	0.0249494	Down
98	ENSGALG00000009233	343.298	-1.56104	0.353538	26.1599	2.08663e-06	0.000833066	Down
99	ENSGALG00000009415	51.2431	2.23516	0.748069	15.7811	0.000374267	0.0325827	Up
100	ENSGALG00000009553	291.451	-2.53026	0.477486	36.5516	1.15589e-08	1.04881e-05	Down
101	ENSGALG00000009725	31.9981	-3.19276	0.890156	13.4407	0.00120614	0.0665107	Down
102	ENSGALG00000009848	32.4758	-2.27305	0.810946	14.6883	0.000646371	0.0470907	Down
103	ENSGALG00000009854	45.3535	-2.52308	0.60416	29.9419	3.14921e-07	0.000196452	Down
104	ENSGALG00000009858	1041.55	-1.81338	0.341822	29.4032	4.12261e-07	0.000242046	Down
105	ENSGALG00000010101	35330	0.307664	0.344472	17.5371	0.000155551	0.0187054	Up
106	ENSGALG00000010108	215.121	-1.4444	0.448008	15.8241	0.000366295	0.0323539	Down
107	ENSGALG00000010120	149.01	-2.43209	0.440432	38.7872	3.7798e-09	3.77261e-06	Down
108	ENSGALG00000010136	14.5486	1.3512	1.00287	13.8308	0.000992407	0.0586107	Up
109	ENSGALG00000010174	161.712	0.0219719	0.36858	16.8921	0.000214751	0.0234488	Up
110	ENSGALG00000010175	14467	0.419708	0.314505	25.3313	3.15771e-06	0.00108668	Up
111	ENSGALG00000010195	44.9096	-6.55884	1.11127	41.5265	9.60796e-10	1.36996e-06	Down
112	ENSGALG00000010225	1165.22	0.589204	0.560633	12.4242	0.00200505	0.0913808	Up
113	ENSGALG00000010562	34.7478	-2.10882	0.717861	12.839	0.00162949	0.0790002	Down
114	ENSGALG00000010752	8964.73	0.138255	0.279257	14.4794	0.00071752	0.0497331	Up
115	ENSGALG00000010889	100.014	-2.19945	0.524633	18.3881	0.000101644	0.0140903	Down
116	ENSGALG00000011084	383.845	-2.4795	0.703378	12.0957	0.00236292	0.0982681	Down
117	ENSGALG00000011209	21.0355	-3.46605	1.00053	16.2794	0.000291728	0.0279975	Down
118	ENSGALG00000011376	2882.63	0.294139	0.328826	21.8099	1.8367e-05	0.00398523	Up
119	ENSGALG00000011509	27.5122	-2.80385	0.846692	16.484	0.000263364	0.026301	Down
120	ENSGALG00000011550	81.8721	-1.05812	0.667237	13.608	0.00110932	0.0639701	Down
121	ENSGALG00000011859	68.8399	2.10722	1.28107	26.8095	1.50796e-06	0.000627124	Up
122	ENSGALG00000011967	32.3158	-2.63478	0.73063	21.0019	2.75108e-05	0.00549171	Down
123	ENSGALG00000012104	28.0048	-5.48445	1.32519	28.1068	7.88299e-07	0.000437112	Down
124	ENSGALG00000012160	31.7941	-2.82764	0.714542	16.4148	0.000272628	0.0267461	Down
125	ENSGALG00000012369	43.4221	0.377328	0.548186	12.6398	0.00180009	0.0849321	Up
126	ENSGALG00000012388	478.077	0.389543	0.501369	15.1024	0.000525474	0.0400363	Up
127	ENSGALG00000012518	28.4184	-2.16951	0.782168	13.678	0.00107117	0.0621928	Down
128	ENSGALG00000012681	8.16929	-8.56114	2.26817	18.6312	9.00113e-05	0.0130203	Down
129	ENSGALG00000012684	210.997	-1.62359	0.469236	16.5462	0.000255288	0.0262684	Down
130	ENSGALG00000012801	26.3947	-3.17901	1.02734	13.4884	0.00117768	0.0658509	Down
131	ENSGALG00000012816	1528.78	0.286871	0.398138	12.5276	0.00190396	0.0882268	Up
132	ENSGALG00000012830	8749.19	0.334688	0.353076	13.3274	0.00127642	0.0688646	Up
133	ENSGALG00000012994	468.71	0.387052	0.372705	24.5386	4.6936e-06	0.0014196	Up
134	ENSGALG00000013372	21.8183	-5.13485	1.39782	18.8223	8.1806e-05	0.0123713	Down
135	ENSGALG00000013481	25.8205	-2.16155	0.88492	12.8377	0.0016305	0.0790002	Down
136	ENSGALG00000013535	9.29627	-2.79898	1.22264	13.5974	0.0011152	0.0639701	Down
137	ENSGALG00000013568	160.346	0.508465	0.819363	17.7058	0.000142964	0.0176163	Up
138	ENSGALG00000013740	1312.03	0.324079	1.02447	12.383	0.00204671	0.0927117	Up
139	ENSGALG00000013776	29.1721	-2.77909	0.710497	17.0339	0.000200047	0.022537	Down
140	ENSGALG00000013867	3840.94	0.165556	0.392529	14.0448	0.000891696	0.0563293	Up
141	ENSGALG00000013875	68.724	1.40436	0.690688	13.4166	0.00122074	0.0669462	Up
142	ENSGALG00000014023	1301.64	0.0807417	0.221324	12.0039	0.00247392	0.0996278	Up
143	ENSGALG00000014054	30.0162	-0.614171	0.711096	13.2436	0.00133103	0.070291	Down
144	ENSGALG00000014155	2651.04	0.551802	0.358246	12.1077	0.00234875	0.0980874	Up
145	ENSGALG00000014442	104.404	-2.01764	0.543566	25.2637	3.26623e-06	0.00108668	Down
146	ENSGALG00000014561	39.5478	-1.71819	0.623538	19.2799	6.50763e-05	0.0110089	Down
147	ENSGALG00000014718	22.3823	-4.20405	1.30544	13.2768	0.00130911	0.0695014	Down
148	ENSGALG00000014877	21.9198	-2.19277	0.777785	25.5255	2.86553e-06	0.00107343	Down
149	ENSGALG00000014892	11.8734	-2.80186	1.2151	12.2849	0.00214969	0.0953604	Down
150	ENSGALG00000014933	60.4942	-3.12267	1.50132	12.1613	0.00228668	0.0968741	Down
151	ENSGALG00000014978	20.951	-3.48006	1.16729	14.2082	0.000821725	0.0546776	Down
152	ENSGALG00000015122	367.395	-0.602987	0.502571	17.2439	0.00018011	0.0209032	Down
153	ENSGALG00000015148	42.0074	-1.83629	0.672186	17.8109	0.000135651	0.0171384	Down
154	ENSGALG00000015308	5.35368	-3.38696	1.45102	15.4232	0.000447606	0.0357069	Down
155	ENSGALG00000015692	32.1045	-1.79895	0.604208	16.8462	0.000219736	0.0234488	Down
156	ENSGALG00000015822	100.653	-1.87364	0.511091	13.3914	0.00123619	0.0674232	Down
157	ENSGALG00000015884	94.234	-3.95633	0.52508	64.5659	9.54303e-15	9.5249e-11	Down
158	ENSGALG00000016088	550.567	-0.117714	0.211944	13.9909	0.000916048	0.0564388	Down
159	ENSGALG00000016325	11.3458	-3.82944	1.16535	25.3064	3.19726e-06	0.00108668	Down
160	ENSGALG00000016463	12.0426	-1.67355	1.0457	13.9975	0.000913011	0.0564388	Down
161	ENSGALG00000016569	6.81836	-5.97278	1.81889	14.3379	0.000770127	0.0519368	Down
162	ENSGALG00000016590	6.25553	-3.40041	1.99252	12.1328	0.00231948	0.0976376	Down
163	ENSGALG00000016609	30.2549	-2.70242	0.647615	39.0484	3.31697e-09	3.67852e-06	Down
164	ENSGALG00000016669	15.9883	4.59782	1.65615	16.4097	0.00027333	0.0267461	Up
165	ENSGALG00000016823	2988.12	0.19516	0.394628	18.0462	0.000120593	0.0156317	Up
166	ENSGALG00000016986	66.3513	-2.54104	0.761338	15.5855	0.000412711	0.0338875	Down
167	ENSGALG00000017148	4.90737	-6.93212	1.81521	15.6626	0.000397119	0.0334857	Down
168	ENSGALG00000018772	465.382	0.926228	0.51906	12.2327	0.00220648	0.0957518	Up
169	ENSGALG00000018967	35.7117	-2.48481	0.743585	16.1634	0.000309152	0.0288378	Down
170	ENSGALG00000019325	210.162	2.27213	1.3825	27.1249	1.28798e-06	0.000566654	Up
171	ENSGALG00000019336	5.64266	-4.18383	1.54628	22.7097	1.17128e-05	0.00285136	Down
172	ENSGALG00000019602	7.62979	-2.8614	1.85415	13.8312	0.000992167	0.0586107	Down
173	ENSGALG00000019696	9.29957	5.64357	1.87235	13.444	0.00120415	0.0665107	Up
174	ENSGALG00000019768	60.7863	1.02636	0.642177	12.0779	0.00238409	0.0983132	Up
175	ENSGALG00000021653	33.6843	-2.54388	0.710878	12.72	0.00172939	0.0821953	Down
176	ENSGALG00000022137	5000.99	0.389907	0.243189	12.0643	0.00240035	0.0983132	Up
177	ENSGALG00000022145	199.011	-2.5963	0.433205	41.7414	8.6292e-10	1.36996e-06	Down
178	ENSGALG00000023689	16.1163	-6.41606	1.92492	12.3771	0.00205283	0.0927117	Down
179	ENSGALG00000023812	6.68454	2.32279	1.52951	13.8904	0.000963249	0.0577453	Up
180	ENSGALG00000023975	5162.36	0.4348	0.344594	12.5185	0.00191265	0.0882268	Up
181	ENSGALG00000024248	13.488	-1.03424	1.81641	18.7733	8.38361e-05	0.0124891	Down
182	ENSGALG00000025745	43.4985	-0.673884	0.65892	14.0666	0.000882016	0.0560726	Down
183	ENSGALG00000025768	470.302	0.382523	0.236421	12.5378	0.00189436	0.0882268	Up
184	ENSGALG00000025796	58.3962	1.22857	0.405419	15.4091	0.000450764	0.0357069	Up
185	ENSGALG00000025886	1700.04	0.668807	0.429013	14.6178	0.000669559	0.0477398	Up
186	ENSGALG00000025956	17.9009	-2.40056	0.902591	13.2822	0.0013056	0.0695014	Down
187	ENSGALG00000026038	17.5434	-3.9326	0.792183	27.6939	9.69027e-07	0.000483593	Down
188	ENSGALG00000026077	117.812	-2.4176	0.734656	14.0044	0.000909881	0.0564388	Down
189	ENSGALG00000026241	230.521	2.05951	0.597369	14.1328	0.000853297	0.0556651	Up
190	ENSGALG00000026518	2708.28	0.373555	0.427932	27.0974	1.30578e-06	0.000566654	Up
191	ENSGALG00000026677	58.0231	-2.94742	0.77932	14.1811	0.000832944	0.0547779	Down
192	ENSGALG00000026928	92.5665	-0.0743026	0.487476	40.8909	1.32022e-09	1.64714e-06	Down
193	ENSGALG00000026995	77.1695	-0.991617	0.477687	13.5828	0.00112342	0.0640733	Down
194	ENSGALG00000027201	307.957	4.93849	2.00184	19.541	5.71119e-05	0.0100006	Up
195	ENSGALG00000027308	51.8687	-2.05548	0.870278	13.1681	0.00138223	0.0718546	Down
196	ENSGALG00000027337	266.117	0.0638372	0.346451	14.0042	0.000909976	0.0564388	Up
197	ENSGALG00000027374	1865.52	0.0697429	0.39385	14.6176	0.000669629	0.0477398	Up
198	ENSGALG00000027454	39.7752	-3.00191	0.787847	33.2517	6.0186e-08	4.6209e-05	Down
199	ENSGALG00000027593	240.611	-0.43406	0.245738	30.586	2.28214e-07	0.000151854	Down
200	ENSGALG00000027614	278.555	-2.64056	0.375378	58.3588	2.12598e-13	7.07312e-10	Down
201	ENSGALG00000027618	119.689	-2.82118	0.468054	44.8131	1.85764e-10	3.70822e-07	Down
202	ENSGALG00000027743	34438.8	0.509903	0.402937	18.0588	0.000119834	0.0156317	Up
203	ENSGALG00000027757	2987.22	0.220931	0.344323	12.1904	0.00225368	0.0968741	Up
204	ENSGALG00000027762	1500.74	-0.3988	0.145214	14.5049	0.000708443	0.0497331	Down
205	ENSGALG00000027777	22.8703	-3.42579	0.920784	18.8622	8.01895e-05	0.0123713	Down
206	ENSGALG00000027892	327.456	-2.43923	0.377979	47.6896	4.40884e-11	1.10012e-07	Down
207	ENSGALG00000028045	227.052	1.12923	0.344327	13.5557	0.00113873	0.0645777	Up
208	ENSGALG00000028318	2117.02	0.572517	0.425598	19.4707	5.91538e-05	0.0101796	Up
209	ENSGALG00000028352	3514.83	0.405353	0.306601	12.2226	0.00221772	0.0958228	Up
210	ENSGALG00000028401	8473.58	0.291669	0.340036	14.481	0.000716957	0.0497331	Up
211	ENSGALG00000028475	192.862	0.246255	0.36086	16.7597	0.000229445	0.0241062	Up
212	ENSGALG00000028635	27.8973	-3.45951	0.85743	27.9612	8.47831e-07	0.000445379	Down
213	ENSGALG00000028649	547.626	-2.76251	0.367865	62.9153	2.17831e-14	1.08709e-10	Down
214	ENSGALG00000028790	11.1664	-2.13256	1.08927	16.8903	0.000214944	0.0234488	Down
215	ENSGALG00000028909	26.353	-2.37119	0.738452	12.0454	0.00242311	0.0983132	Down
216	ENSGALG00000029030	16.0168	-3.24922	1.2326	15.0703	0.000533969	0.0403753	Down
217	ENSGALG00000029076	1906.5	0.688125	0.267059	12.365	0.00206528	0.0928539	Up
218	ENSGALG00000029112	82.2556	-11.7056	2.64025	16.2133	0.000301532	0.0285455	Down
219	chicken_newGene_113	274.323	0.0669214	0.482707	14.0914	0.000871133	0.0557357	Up
220	chicken_newGene_121	1356.96	-1.8138	0.327766	34.2266	3.69646e-08	3.07453e-05	Down
221	chicken_newGene_1298	121.334	1.0837	0.48762	15.8532	0.00036101	0.0321718	Up
222	chicken_newGene_134	10.2734	-4.45735	1.70835	13.1046	0.00142686	0.0727581	Down
223	chicken_newGene_1432	8.46945	-5.98208	1.58496	13.8843	0.000966182	0.0577453	Down
224	chicken_newGene_1905	43.7936	6.7946	1.9583	14.3988	0.000747038	0.0507223	Up
225	chicken_newGene_1980	49.479	-2.99461	0.895303	17.7563	0.0001394	0.0173919	Down
226	chicken_newGene_2205	1903.48	0.578796	0.391871	23.8045	6.77501e-06	0.00187837	Up
227	chicken_newGene_2216	23.9391	-8.11577	2.031	16.0343	0.000329763	0.030196	Down
228	chicken_newGene_2278	90.1894	-2.05483	0.777401	21.9581	1.70553e-05	0.00386885	Down
229	chicken_newGene_2281	163.58	-0.0208325	0.497953	15.5219	0.000426055	0.0345728	Down
230	chicken_newGene_2322	67.6539	-3.56997	1.18958	13.2824	0.00130544	0.0695014	Down
231	chicken_newGene_3438	8.40404	9.55467	2.47087	18.5849	9.21174e-05	0.0131346	Up
232	chicken_newGene_3893	18556	0.460427	0.50451	13.7517	0.00103242	0.0606154	Up
233	chicken_newGene_3998	80.9271	0.535236	1.06957	12.1253	0.0023282	0.0976376	Up
234	chicken_newGene_40	443.164	0.363095	0.6313	15.9313	0.000347179	0.0313589	Up
235	chicken_newGene_4077	258.328	0.26371	0.54251	14.5798	0.000682383	0.048304	Up
236	chicken_newGene_4083	111.187	-0.513893	0.717497	18.4842	9.68741e-05	0.0136183	Down
237	chicken_newGene_41	14.574	-2.87392	2.40306	12.3257	0.00210628	0.0942724	Down
238	chicken_newGene_4393	17040.9	0.569688	0.353571	24.2801	5.34138e-06	0.00156801	Up
239	chicken_newGene_4935	79.3999	-2.71197	0.773835	12.0488	0.00241898	0.0983132	Down
240	chicken_newGene_4936	102.098	-2.92399	1.2142	12.6355	0.00180399	0.0849321	Down
241	chicken_newGene_4973	149.911	-0.171823	1.0041	17.602	0.000150579	0.0183284	Down
242	chicken_newGene_5004	47.4541	-2.89349	0.903014	12.167	0.00228019	0.0968741	Down
243	chicken_newGene_5081	8487.12	0.561961	0.345214	23.325	8.61079e-06	0.00231727	Up
244	chicken_newGene_5125	48.5469	-1.95875	0.62486	22.1019	1.58721e-05	0.00368417	Down
245	chicken_newGene_5216	4.30977	4.79342	2.48628	12.7863	0.00167299	0.0798952	Up
246	chicken_newGene_5716	114.223	-2.93165	0.789592	17.4946	0.000158887	0.0188792	Down
247	chicken_newGene_732	10.7191	-4.6048	1.2292	14.4294	0.000735677	0.0504369	Down
248	chicken_newGene_811	49.9781	1.16402	0.928053	16.0493	0.000327289	0.030196	Up
249	chicken_newGene_813	178.838	2.85981	1.02635	12.8098	0.00165347	0.0793427	Up

## Sheet: T15 vs T2
	GeneID	baseMean	log2FoldChange	lfcSE	stat	pvalue	padj	deg_status
1	ENSGALG00000000141	210.244	-1.82913	0.611125	-2.99305	0.00276202	0.0866203	Down
2	ENSGALG00000000206	70.1972	-2.22516	0.532298	-4.18028	2.91147e-05	0.00509798	Down
3	ENSGALG00000000209	20.2859	-2.55641	0.875503	-2.91993	0.00350107	0.0980166	Down
4	ENSGALG00000000251	6.12779	-6.66964	2.21514	-3.01093	0.00260448	0.0836688	Down
5	ENSGALG00000000558	6.04008	-7.00344	1.87803	-3.72914	0.000192135	0.0197899	Down
6	ENSGALG00000000562	63.2295	-2.86779	0.654365	-4.38255	1.17298e-05	0.00273144	Down
7	ENSGALG00000000577	1402.45	0.548829	0.156829	3.49953	0.000466076	0.0304347	Up
8	ENSGALG00000000589	7740.34	1.32998	0.266774	4.98542	6.18284e-07	0.000324785	Up
9	ENSGALG00000000694	99.5129	-2.31719	0.661193	-3.50456	0.000457366	0.030412	Down
10	ENSGALG00000000775	79.3061	-1.89127	0.584844	-3.2338	0.00122157	0.0530321	Down
11	ENSGALG00000000776	358.519	1.14229	0.393738	2.90114	0.00371809	0.0997615	Up
12	ENSGALG00000000794	1731.39	0.675192	0.202859	3.32838	0.000873515	0.0436267	Up
13	ENSGALG00000000834	22.5316	-3.06498	0.776443	-3.94746	7.89848e-05	0.010623	Down
14	ENSGALG00000000878	11.69	-5.85406	1.65618	-3.53467	0.000408292	0.0289787	Down
15	ENSGALG00000001163	1221.49	1.17039	0.283742	4.12486	3.70964e-05	0.0060506	Up
16	ENSGALG00000001182	2234.74	0.619185	0.204839	3.02278	0.0025046	0.081973	Up
17	ENSGALG00000001183	962.147	1.26889	0.391619	3.24012	0.00119478	0.0522059	Up
18	ENSGALG00000001209	1027.36	0.921312	0.267347	3.44613	0.000568668	0.0337301	Up
19	ENSGALG00000001226	25.4111	-3.24808	0.918412	-3.53663	0.000405265	0.0289787	Down
20	ENSGALG00000001329	23640.5	0.943349	0.259448	3.63598	0.000276927	0.0240193	Up
21	ENSGALG00000001342	43.1733	3.3145	0.833326	3.97743	6.96639e-05	0.00963012	Up
22	ENSGALG00000001491	49.3601	-2.48567	0.508395	-4.88924	1.01225e-06	0.000444321	Down
23	ENSGALG00000001571	71.6505	-2.73636	0.618066	-4.4273	9.54215e-06	0.00238304	Down
24	ENSGALG00000001589	41.7111	-3.69113	0.953379	-3.87163	0.000108109	0.0136843	Down
25	ENSGALG00000001631	3.20559	-9.76894	2.91936	-3.34626	0.0008191	0.0430273	Down
26	ENSGALG00000001898	21241.3	1.03083	0.210913	4.88745	1.02152e-06	0.000444321	Up
27	ENSGALG00000002016	5.52396	-5.75673	1.6243	-3.54412	0.000393932	0.0289787	Down
28	ENSGALG00000002043	3108.37	0.95403	0.249827	3.81877	0.000134121	0.0160122	Up
29	ENSGALG00000002080	15.1357	-5.27608	1.18391	-4.45649	8.3314e-06	0.00218824	Down
30	ENSGALG00000002095	1537.26	0.690286	0.234825	2.93958	0.00328658	0.0956477	Up
31	ENSGALG00000002112	2181.72	-0.875459	0.263727	-3.31957	0.000901564	0.0438511	Down
32	ENSGALG00000002113	38.4501	-3.10253	1.02796	-3.01813	0.0025434	0.0824721	Down
33	ENSGALG00000002192	83.788	-3.33891	0.80826	-4.13098	3.61216e-05	0.0060506	Down
34	ENSGALG00000002227	1549.24	-1.21796	0.353563	-3.4448	0.000571479	0.0337301	Down
35	ENSGALG00000002260	4992.36	3.23648	0.672852	4.81009	1.50859e-06	0.000558328	Up
36	ENSGALG00000002278	1998.48	0.817728	0.265927	3.07501	0.00210493	0.0739612	Up
37	ENSGALG00000002283	560.295	1.82042	0.622002	2.92671	0.00342563	0.097533	Up
38	ENSGALG00000002286	4324.48	1.35379	0.373778	3.62191	0.000292434	0.0241801	Up
39	ENSGALG00000002347	2556.7	1.504	0.445141	3.37871	0.000728278	0.0400782	Up
40	ENSGALG00000002377	99.0121	-1.75627	0.605356	-2.90122	0.00371719	0.0997615	Down
41	ENSGALG00000002453	5.80303	-3.77681	1.27226	-2.96858	0.00299178	0.0908217	Down
42	ENSGALG00000002559	370.729	-1.88067	0.517871	-3.63154	0.000281733	0.0240193	Down
43	ENSGALG00000002771	40.3499	-3.49965	0.754939	-4.63567	3.55777e-06	0.00103828	Down
44	ENSGALG00000002871	8701.62	0.857563	0.261787	3.27581	0.00105361	0.0487631	Up
45	ENSGALG00000003113	58.8916	-2.55026	0.850289	-2.99929	0.00270613	0.0856343	Down
46	ENSGALG00000003120	14.6489	-3.74941	1.17831	-3.18204	0.00146243	0.0586425	Down
47	ENSGALG00000003205	2419.48	1.17529	0.317161	3.70565	0.00021085	0.0207028	Up
48	ENSGALG00000003212	3107.41	1.83821	0.58377	3.14885	0.00163913	0.0621687	Up
49	ENSGALG00000003239	4835.89	0.869488	0.272953	3.18549	0.00144509	0.0586182	Up
50	ENSGALG00000003294	26.0019	-3.23625	0.820393	-3.94476	7.98794e-05	0.010623	Down
51	ENSGALG00000003349	31.5001	-2.19849	0.643377	-3.41711	0.000632901	0.0366009	Down
52	ENSGALG00000003386	60721.1	1.0055	0.326324	3.0813	0.00206098	0.073399	Up
53	ENSGALG00000003422	929.748	1.7314	0.571951	3.02718	0.00246849	0.081973	Up
54	ENSGALG00000003433	188.201	2.29982	0.52002	4.42257	9.75353e-06	0.00238304	Up
55	ENSGALG00000003527	20717.7	1.167	0.30998	3.76476	0.000166707	0.0180559	Up
56	ENSGALG00000003578	279.464	-3.59473	0.874545	-4.1104	3.94969e-05	0.00628719	Down
57	ENSGALG00000003764	346.745	-0.836768	0.274424	-3.04917	0.00229472	0.0788171	Down
58	ENSGALG00000003792	57.4334	-2.7123	0.860701	-3.15127	0.00162563	0.0619485	Down
59	ENSGALG00000003818	14.8695	-4.1912	1.20769	-3.47041	0.00051966	0.031951	Down
60	ENSGALG00000003845	39297.4	1.01004	0.315819	3.19815	0.00138311	0.0572085	Up
61	ENSGALG00000003863	16.1871	-4.8164	1.47832	-3.25802	0.00112194	0.0505886	Down
62	ENSGALG00000003939	93.6528	-3.78758	0.900353	-4.20677	2.59047e-05	0.00477464	Down
63	ENSGALG00000003951	35.4856	-3.30628	0.852798	-3.87698	0.000105763	0.0135505	Down
64	ENSGALG00000004001	3588.95	0.88308	0.249317	3.54199	0.000397117	0.0289787	Up
65	ENSGALG00000004004	160.54	-1.59249	0.433772	-3.67126	0.000241358	0.0219585	Down
66	ENSGALG00000004132	4754.42	0.913378	0.291761	3.13056	0.00174471	0.0652309	Up
67	ENSGALG00000004153	2279.26	0.6663	0.185664	3.58874	0.000332285	0.0258592	Up
68	ENSGALG00000004162	1293.41	1.33319	0.349628	3.81318	0.000137192	0.0161724	Up
69	ENSGALG00000004170	4279.26	1.52553	0.338618	4.50516	6.63239e-06	0.00186558	Up
70	ENSGALG00000004193	1705.29	0.773327	0.248759	3.10874	0.00187888	0.06854	Up
71	ENSGALG00000004284	13.8773	-4.97678	1.13451	-4.3867	1.15081e-05	0.00273144	Down
72	ENSGALG00000004357	45.7091	-3.13123	0.902318	-3.47021	0.000520048	0.031951	Down
73	ENSGALG00000004364	11.1504	-3.71541	1.14148	-3.2549	0.0011343	0.0509273	Down
74	ENSGALG00000004438	5.29746	-4.95643	1.54506	-3.20792	0.00133697	0.056185	Down
75	ENSGALG00000004440	699.044	-0.746349	0.257363	-2.89999	0.0037318	0.0997615	Down
76	ENSGALG00000004610	13073.6	0.931303	0.317779	2.93066	0.0033824	0.0968269	Up
77	ENSGALG00000004621	17.19	-4.14002	1.24038	-3.33769	0.000844768	0.0434557	Down
78	ENSGALG00000004639	109.891	-2.10435	0.658435	-3.19599	0.00139351	0.0574127	Down
79	ENSGALG00000004702	35.544	-1.7906	0.558844	-3.20412	0.00135478	0.0564069	Down
80	ENSGALG00000004709	92.6737	-2.2878	0.722277	-3.16748	0.00153764	0.0598346	Down
81	ENSGALG00000004719	37066	0.781427	0.237982	3.28356	0.00102505	0.0478632	Up
82	ENSGALG00000004725	1712.14	0.738642	0.251551	2.93635	0.00332094	0.0963808	Up
83	ENSGALG00000004792	3353.33	0.682893	0.232906	2.93206	0.00336726	0.0966571	Up
84	ENSGALG00000004980	14.1155	-3.52839	1.21141	-2.91263	0.00358403	0.0987898	Down
85	ENSGALG00000005030	9.28115	-4.81533	1.59284	-3.02312	0.00250186	0.081973	Down
86	ENSGALG00000005031	4.21231	-10.3613	2.62066	-3.95371	7.69495e-05	0.0104991	Down
87	ENSGALG00000005038	10.7668	-6.17512	2.08312	-2.96436	0.00303316	0.0910468	Down
88	ENSGALG00000005227	147.244	1.08668	0.289712	3.75092	0.000176189	0.0186974	Up
89	ENSGALG00000005302	345.643	-0.95853	0.32247	-2.97246	0.00295425	0.0902249	Down
90	ENSGALG00000005309	33.0201	-2.02767	0.613524	-3.30496	0.000949899	0.0455691	Down
91	ENSGALG00000005359	25.1159	-3.16909	0.941597	-3.36565	0.000763633	0.0413543	Down
92	ENSGALG00000005512	11009	1.10404	0.290567	3.79958	0.000144939	0.0167333	Up
93	ENSGALG00000005540	2.15467	-6.87715	2.32211	-2.9616	0.00306046	0.0916046	Down
94	ENSGALG00000005642	10.3963	-4.46506	1.27136	-3.51203	0.000444691	0.0303372	Down
95	ENSGALG00000005644	36.2777	-3.6122	0.995115	-3.62993	0.000283495	0.0240193	Down
96	ENSGALG00000005656	372.146	2.28948	0.689674	3.31965	0.000901306	0.0438511	Up
97	ENSGALG00000005678	166.059	-2.99123	0.896475	-3.33665	0.000847936	0.0434557	Down
98	ENSGALG00000005725	35.328	-2.98518	0.746281	-4.00007	6.33225e-05	0.00923981	Down
99	ENSGALG00000005820	55.9461	-2.95744	0.847763	-3.48853	0.000485692	0.0313048	Down
100	ENSGALG00000005849	627.022	2.54102	0.681265	3.72985	0.000191593	0.0197899	Up
101	ENSGALG00000005868	6765.49	1.32571	0.362789	3.65422	0.000257961	0.023	Up
102	ENSGALG00000005911	91.0136	-1.80836	0.584936	-3.09155	0.00199114	0.0711528	Down
103	ENSGALG00000006123	41.2849	-3.55367	0.790413	-4.49597	6.92536e-06	0.00186558	Down
104	ENSGALG00000006211	16307.9	1.27793	0.335348	3.81076	0.000138541	0.0161724	Up
105	ENSGALG00000006245	30.2633	2.10927	0.710726	2.96777	0.00299973	0.0908217	Up
106	ENSGALG00000006300	132.937	-1.98667	0.626596	-3.17057	0.0015214	0.0598346	Down
107	ENSGALG00000006567	80.4249	-2.01795	0.695789	-2.90024	0.0037288	0.0997615	Down
108	ENSGALG00000006583	64.391	-2.72239	0.521638	-5.21892	1.79967e-07	0.000118171	Down
109	ENSGALG00000006630	322.964	1.27741	0.433369	2.94762	0.00320231	0.0939761	Up
110	ENSGALG00000006644	260.48	2.68078	0.720186	3.72235	0.000197377	0.0200269	Up
111	ENSGALG00000006657	333.578	1.26157	0.427489	2.95112	0.00316621	0.0934352	Up
112	ENSGALG00000006775	1181.86	1.86514	0.520632	3.58246	0.00034037	0.0262936	Up
113	ENSGALG00000006840	15.5918	-3.73164	1.095	-3.40788	0.000654695	0.0371231	Down
114	ENSGALG00000006862	4209.21	1.0069	0.284382	3.54067	0.00039911	0.0289787	Up
115	ENSGALG00000006992	307.943	-1.89327	0.615378	-3.07659	0.00209385	0.0738188	Down
116	ENSGALG00000007078	2080.2	1.16879	0.351124	3.32871	0.000872498	0.0436267	Up
117	ENSGALG00000007128	116.471	-2.61192	0.779782	-3.34955	0.000809436	0.0429492	Down
118	ENSGALG00000007210	3753.43	1.1176	0.322613	3.46421	0.000531787	0.0321089	Up
119	ENSGALG00000007248	11.934	-3.29535	1.00304	-3.28535	0.00101856	0.0477723	Down
120	ENSGALG00000007355	2659.21	1.5973	0.375908	4.24917	2.14566e-05	0.00409859	Up
121	ENSGALG00000007408	2.04283	-7.53708	2.54079	-2.96644	0.00301274	0.0909536	Down
122	ENSGALG00000007416	42.1251	-3.78616	1.07063	-3.53638	0.000405646	0.0289787	Down
123	ENSGALG00000007418	52.6387	-2.23702	0.756859	-2.95566	0.00312002	0.0923351	Down
124	ENSGALG00000007447	2908.56	1.50351	0.433032	3.47206	0.000516478	0.031951	Up
125	ENSGALG00000007463	404337	1.52231	0.419938	3.62508	0.000288874	0.0240944	Up
126	ENSGALG00000007511	84.1843	-2.81632	0.607226	-4.63801	3.51776e-06	0.00103828	Down
127	ENSGALG00000007531	1738.53	0.909889	0.247653	3.67404	0.000238742	0.0219585	Up
128	ENSGALG00000007658	2364.24	0.74516	0.235117	3.16932	0.00152795	0.0598346	Up
129	ENSGALG00000007728	5559.08	0.882157	0.283934	3.10691	0.00189053	0.0686596	Up
130	ENSGALG00000007758	4114.69	0.728751	0.231863	3.14302	0.00167214	0.0631923	Up
131	ENSGALG00000007762	10598.3	0.72558	0.233135	3.11228	0.0018565	0.0684364	Up
132	ENSGALG00000007801	67.8288	-2.3373	0.719611	-3.24801	0.00116215	0.0519557	Down
133	ENSGALG00000007849	36.2884	-2.94348	0.672284	-4.37833	1.19595e-05	0.00273144	Down
134	ENSGALG00000007973	1716.82	0.883304	0.221522	3.98743	6.67931e-05	0.00935638	Up
135	ENSGALG00000007978	6041.84	1.1036	0.377447	2.92386	0.00345718	0.0979006	Up
136	ENSGALG00000008013	1266.44	0.467577	0.14326	3.26383	0.00109917	0.050208	Up
137	ENSGALG00000008074	1627.63	1.07395	0.298087	3.6028	0.000314811	0.0253269	Up
138	ENSGALG00000008127	19.188	-2.76151	0.836376	-3.30175	0.000960837	0.0458843	Down
139	ENSGALG00000008156	47.8123	-2.36176	0.732716	-3.22329	0.00126727	0.0543426	Down
140	ENSGALG00000008306	15.4794	-3.6524	1.13284	-3.22411	0.00126366	0.0543426	Down
141	ENSGALG00000008325	1111.88	-0.801795	0.184945	-4.33531	1.45556e-05	0.0030421	Down
142	ENSGALG00000008408	1147.81	2.87982	0.719937	4.0001	6.33153e-05	0.00923981	Up
143	ENSGALG00000008431	421.866	2.06291	0.621161	3.32105	0.000896797	0.0438511	Up
144	ENSGALG00000008435	2447.82	-0.591175	0.197388	-2.99499	0.00274451	0.0863289	Down
145	ENSGALG00000008436	3.20398	-5.78288	1.95056	-2.96472	0.00302957	0.0910468	Down
146	ENSGALG00000008445	8.46701	-6.9157	1.69693	-4.0754	4.59343e-05	0.00720278	Down
147	ENSGALG00000008491	707.912	0.857073	0.284784	3.00955	0.00261634	0.0836688	Up
148	ENSGALG00000008518	1767.91	0.894516	0.290589	3.07828	0.00208199	0.0736477	Up
149	ENSGALG00000008600	67.0608	-2.23632	0.717773	-3.11563	0.00183551	0.0679009	Down
150	ENSGALG00000008623	8.40703	-5.38494	1.84961	-2.91139	0.00359822	0.0987898	Down
151	ENSGALG00000008677	11412.5	1.24638	0.287311	4.33809	1.43723e-05	0.0030421	Up
152	ENSGALG00000008713	14.2154	-2.97738	0.909465	-3.27377	0.00106123	0.0489003	Down
153	ENSGALG00000008930	5.68316	-4.35014	1.28767	-3.3783	0.000729357	0.0400782	Down
154	ENSGALG00000008949	5432.19	1.13501	0.262205	4.32871	1.49986e-05	0.0030421	Up
155	ENSGALG00000008970	68.2642	-3.7505	0.895	-4.1905	2.78338e-05	0.00504176	Down
156	ENSGALG00000008978	69.1917	-2.17682	0.689999	-3.15481	0.00160603	0.0615801	Down
157	ENSGALG00000009157	6.70629	-7.68382	2.37194	-3.23946	0.00119756	0.0522059	Down
158	ENSGALG00000009216	9.32351	-8.57265	2.54839	-3.36394	0.000768377	0.0413978	Down
159	ENSGALG00000009233	343.298	-1.60011	0.355795	-4.49728	6.88296e-06	0.00186558	Down
160	ENSGALG00000009321	58.2243	-2.36808	0.729595	-3.24575	0.00117142	0.0520748	Down
161	ENSGALG00000009415	51.2431	2.92931	0.777666	3.7668	0.000165353	0.0180559	Up
162	ENSGALG00000009553	291.451	-2.54721	0.478427	-5.32413	1.01435e-07	8.19754e-05	Down
163	ENSGALG00000009628	17.1335	-4.51827	1.47286	-3.06769	0.00215723	0.0755462	Down
164	ENSGALG00000009848	32.4758	-2.93541	0.794125	-3.6964	0.000218675	0.0210771	Down
165	ENSGALG00000009854	45.3535	-3.10582	0.608108	-5.10736	3.2669e-07	0.000201895	Down
166	ENSGALG00000009858	1041.55	-1.29217	0.341685	-3.78175	0.000155729	0.017486	Down
167	ENSGALG00000009940	45.4077	-2.24079	0.744005	-3.01179	0.00259709	0.0836688	Down
168	ENSGALG00000010101	35330	1.38105	0.344475	4.00915	6.09388e-05	0.00923981	Up
169	ENSGALG00000010108	215.121	-1.66201	0.45285	-3.67011	0.000242451	0.0219585	Down
170	ENSGALG00000010115	122.398	-1.10123	0.377215	-2.91938	0.00350729	0.0980166	Down
171	ENSGALG00000010120	149.01	-2.31414	0.429875	-5.38329	7.31374e-08	6.40512e-05	Down
172	ENSGALG00000010174	161.712	1.34539	0.374125	3.59609	0.000323034	0.0253269	Up
173	ENSGALG00000010175	14467	1.54056	0.314518	4.89816	9.67386e-07	0.000444321	Up
174	ENSGALG00000010195	44.9096	-4.73392	1.01594	-4.65963	3.16773e-06	0.00100849	Down
175	ENSGALG00000010225	1165.22	1.96587	0.565993	3.47331	0.000514085	0.031951	Up
176	ENSGALG00000010256	1456.88	1.08132	0.35545	3.04212	0.00234919	0.0798346	Up
177	ENSGALG00000010318	2959.43	0.834585	0.278572	2.99594	0.00273603	0.0863207	Up
178	ENSGALG00000010562	34.7478	-2.34034	0.72127	-3.24475	0.00117555	0.0520748	Down
179	ENSGALG00000010651	137.98	-2.40845	0.737628	-3.26513	0.00109415	0.0501971	Down
180	ENSGALG00000010752	8964.73	0.984266	0.279279	3.52431	0.000424588	0.0292397	Up
181	ENSGALG00000010836	2.71152	-8.53481	2.68776	-3.17543	0.00149613	0.0595394	Down
182	ENSGALG00000010889	100.014	-1.56285	0.532792	-2.93332	0.0033536	0.0966571	Down
183	ENSGALG00000010892	16.0699	-3.04901	0.981594	-3.10618	0.00189523	0.0686596	Down
184	ENSGALG00000011094	16.5894	-2.83737	0.938314	-3.0239	0.00249539	0.081973	Down
185	ENSGALG00000011118	1688.54	0.577678	0.196051	2.94657	0.00321318	0.0940325	Up
186	ENSGALG00000011186	17.8146	-3.06506	1.01021	-3.03407	0.00241278	0.0804718	Down
187	ENSGALG00000011209	21.0355	-3.31796	0.922272	-3.5976	0.000321172	0.0253269	Down
188	ENSGALG00000011241	6.57022	-4.0326	1.29245	-3.12013	0.0018077	0.0671085	Down
189	ENSGALG00000011254	16.6333	-3.63125	1.07248	-3.38585	0.000709593	0.0396542	Down
190	ENSGALG00000011309	26.368	-3.99862	1.22594	-3.26168	0.00110756	0.0503724	Down
191	ENSGALG00000011318	340.521	0.876981	0.300027	2.923	0.00346671	0.0979067	Up
192	ENSGALG00000011376	2882.63	1.46225	0.329198	4.44185	8.91867e-06	0.00228536	Up
193	ENSGALG00000011429	46.2038	-1.72657	0.567232	-3.04385	0.00233574	0.0796731	Down
194	ENSGALG00000011509	27.5122	-3.03872	0.80586	-3.77078	0.000162739	0.0179972	Down
195	ENSGALG00000011550	81.8721	-2.42178	0.651353	-3.71807	0.000200747	0.0200269	Down
196	ENSGALG00000011859	68.8399	7.14107	1.31423	5.43367	5.52075e-08	5.8001e-05	Up
197	ENSGALG00000011967	32.3158	-3.21634	0.754088	-4.2652	1.99721e-05	0.00388569	Down
198	ENSGALG00000012037	1215.06	0.558193	0.191207	2.91931	0.00350807	0.0980166	Up
199	ENSGALG00000012104	28.0048	-5.44495	1.14329	-4.76255	1.91166e-06	0.000627623	Down
200	ENSGALG00000012280	9.55771	-3.76256	1.23755	-3.04032	0.00236327	0.0798346	Down
201	ENSGALG00000012341	451.891	0.665476	0.224912	2.95883	0.00308805	0.0919068	Up
202	ENSGALG00000012369	43.4221	1.97481	0.578255	3.41512	0.000637537	0.0366009	Up
203	ENSGALG00000012388	478.077	1.86891	0.502877	3.71643	0.000202061	0.0200269	Up
204	ENSGALG00000012456	70.5458	-2.63483	0.905127	-2.91101	0.00360267	0.0987898	Down
205	ENSGALG00000012518	28.4184	-2.66653	0.749952	-3.55559	0.000377128	0.0285044	Down
206	ENSGALG00000012638	379.68	-1.55466	0.476866	-3.26017	0.00111345	0.0504222	Down
207	ENSGALG00000012681	8.16929	-7.10604	1.92687	-3.68787	0.000226138	0.0212125	Down
208	ENSGALG00000012684	210.997	-1.71014	0.475114	-3.59944	0.000318902	0.0253269	Down
209	ENSGALG00000012801	26.3947	-3.32313	0.988635	-3.36133	0.000775682	0.0415782	Down
210	ENSGALG00000012816	1528.78	1.34613	0.398601	3.37714	0.00073244	0.0400782	Up
211	ENSGALG00000012830	8749.19	1.25	0.353077	3.54029	0.000399684	0.0289787	Up
212	ENSGALG00000012994	468.71	1.81454	0.380527	4.7685	1.85604e-06	0.000627623	Up
213	ENSGALG00000013310	357.593	1.2811	0.43292	2.95921	0.00308434	0.0919068	Up
214	ENSGALG00000013372	21.8183	-5.38264	1.30438	-4.12658	3.68202e-05	0.0060506	Down
215	ENSGALG00000013480	368.561	1.46064	0.454466	3.21396	0.00130917	0.0557794	Up
216	ENSGALG00000013481	25.8205	-2.91682	0.831907	-3.50619	0.000454574	0.030412	Down
217	ENSGALG00000013535	9.29627	-4.24587	1.17128	-3.62499	0.000288967	0.0240944	Down
218	ENSGALG00000013568	160.346	3.24151	0.81023	4.00073	6.31469e-05	0.00923981	Up
219	ENSGALG00000013624	56.4717	-2.09536	0.675006	-3.10422	0.00190784	0.0688788	Down
220	ENSGALG00000013740	1312.03	3.3782	1.02461	3.29705	0.000977075	0.0464077	Up
221	ENSGALG00000013776	29.1721	-2.16239	0.723021	-2.99078	0.00278268	0.0870084	Down
222	ENSGALG00000013795	3809.61	0.805275	0.275848	2.91927	0.00350847	0.0980166	Up
223	ENSGALG00000013863	804.158	1.27724	0.404699	3.15601	0.00159942	0.0615512	Up
224	ENSGALG00000013867	3840.94	1.3548	0.392351	3.45304	0.000554303	0.0332772	Up
225	ENSGALG00000013875	68.724	2.64558	0.718562	3.68177	0.000231616	0.0215342	Up
226	ENSGALG00000013956	4.41868	-6.2769	1.96531	-3.19385	0.00140388	0.0575857	Down
227	ENSGALG00000014023	1301.64	0.701204	0.221134	3.17095	0.00151941	0.0598346	Up
228	ENSGALG00000014054	30.0162	-2.42108	0.690644	-3.50554	0.000455687	0.030412	Down
229	ENSGALG00000014071	51.0419	-3.36745	1.07428	-3.13462	0.00172078	0.0647976	Down
230	ENSGALG00000014127	3.14925	-7.7698	2.62822	-2.9563	0.00311357	0.0923351	Down
231	ENSGALG00000014155	2651.04	1.25119	0.358993	3.48527	0.000491641	0.031495	Up
232	ENSGALG00000014442	104.404	-2.53074	0.522108	-4.84716	1.2524e-06	0.000487322	Down
233	ENSGALG00000014561	39.5478	-2.46532	0.567659	-4.34296	1.40574e-05	0.0030421	Down
234	ENSGALG00000014718	22.3823	-3.79731	1.19014	-3.19066	0.0014195	0.0578035	Down
235	ENSGALG00000014877	21.9198	-3.76592	0.744613	-5.05755	4.24684e-07	0.000247874	Down
236	ENSGALG00000014892	11.8734	-4.0949	1.18096	-3.46742	0.000525476	0.0319719	Down
237	ENSGALG00000014933	60.4942	-5.49271	1.48871	-3.68958	0.000224621	0.0212125	Down
238	ENSGALG00000014976	148.277	4.72283	1.56162	3.02431	0.002492	0.081973	Up
239	ENSGALG00000014978	20.951	-4.03245	1.11638	-3.61208	0.000303747	0.0247377	Down
240	ENSGALG00000015022	18.5213	-3.35144	1.09769	-3.05317	0.00226439	0.0785138	Down
241	ENSGALG00000015122	367.395	1.469	0.505961	2.90339	0.00369144	0.0996975	Up
242	ENSGALG00000015148	42.0074	-2.67924	0.640376	-4.18386	2.86604e-05	0.00509798	Down
243	ENSGALG00000015308	5.35368	-5.22765	1.38276	-3.7806	0.000156452	0.017486	Down
244	ENSGALG00000015692	32.1045	-2.32737	0.599202	-3.88411	0.000102705	0.0133212	Down
245	ENSGALG00000015862	84663.6	1.09953	0.375449	2.92858	0.00340514	0.0972132	Up
246	ENSGALG00000015884	94.234	-3.55889	0.552037	-6.44683	1.14212e-10	8.2517e-07	Down
247	ENSGALG00000016017	3.36675	-6.5073	2.19082	-2.97026	0.00297548	0.0906098	Down
248	ENSGALG00000016034	15.824	-4.33995	1.30466	-3.3265	0.000879454	0.0436267	Down
249	ENSGALG00000016088	550.567	0.613455	0.210284	2.91727	0.0035311	0.0980166	Up
250	ENSGALG00000016200	373.016	4.09346	1.34311	3.04775	0.00230559	0.0789009	Up
251	ENSGALG00000016302	9.95099	-3.04951	1.02123	-2.98612	0.00282538	0.0875617	Down
252	ENSGALG00000016308	9.73292	-4.78405	1.37992	-3.46691	0.000526474	0.0319719	Down
253	ENSGALG00000016321	1299.34	0.942278	0.31416	2.99936	0.00270547	0.0856343	Up
254	ENSGALG00000016325	11.3458	-5.19377	1.06469	-4.87821	1.07052e-06	0.000444321	Down
255	ENSGALG00000016463	12.0426	-3.59097	0.958212	-3.74758	0.000178552	0.0187586	Down
256	ENSGALG00000016590	6.25553	-6.44801	1.82512	-3.53293	0.000410986	0.0289787	Down
257	ENSGALG00000016609	30.2549	-4.2134	0.701646	-6.00502	1.91303e-09	5.02457e-06	Down
258	ENSGALG00000016692	185.814	-1.0533	0.354305	-2.97286	0.00295036	0.0902249	Down
259	ENSGALG00000016719	25.0052	-3.53916	1.10306	-3.20849	0.00133432	0.056185	Down
260	ENSGALG00000016823	2988.12	1.55014	0.394697	3.92741	8.58644e-05	0.0112761	Up
261	ENSGALG00000016839	11.8486	3.23197	1.07406	3.00911	0.00262012	0.0836688	Up
262	ENSGALG00000016880	10.087	-3.1239	1.03898	-3.0067	0.00264096	0.0840786	Down
263	ENSGALG00000016986	66.3513	-2.63022	0.735101	-3.57804	0.000346181	0.0265473	Down
264	ENSGALG00000017148	4.90737	-5.75291	1.90998	-3.01203	0.00259503	0.0836688	Down
265	ENSGALG00000017644	59.8043	-2.83738	0.823329	-3.44623	0.000568461	0.0337301	Down
266	ENSGALG00000018772	465.382	1.846	0.523906	3.52354	0.000425821	0.0292397	Up
267	ENSGALG00000018967	35.7117	-2.50988	0.691341	-3.63044	0.000282934	0.0240193	Down
268	ENSGALG00000019325	210.162	7.89505	1.39145	5.67396	1.39533e-08	2.09727e-05	Up
269	ENSGALG00000019336	5.64266	-8.07791	1.91014	-4.22897	2.34768e-05	0.00440441	Down
270	ENSGALG00000019602	7.62979	-6.04812	1.59553	-3.79067	0.00015024	0.0171568	Down
271	ENSGALG00000019751	53.2979	-2.97057	0.867231	-3.42535	0.000613999	0.0358371	Down
272	ENSGALG00000019768	60.7863	2.25771	0.644997	3.50034	0.000464666	0.0304347	Up
273	ENSGALG00000021230	5565.55	1.5765	0.476847	3.30609	0.000946068	0.0455691	Up
274	ENSGALG00000021355	12.2947	-2.96879	0.977371	-3.03752	0.0023853	0.0803204	Down
275	ENSGALG00000021573	22.0419	-2.44684	0.763836	-3.20336	0.00135836	0.0564069	Down
276	ENSGALG00000022137	5000.99	0.845964	0.243382	3.47588	0.000509187	0.031951	Up
277	ENSGALG00000022145	199.011	-2.26176	0.430883	-5.24914	1.52814e-07	0.000107031	Down
278	ENSGALG00000022337	23.4255	-2.47933	0.77652	-3.19287	0.00140867	0.0575857	Down
279	ENSGALG00000022490	99.8474	-2.34612	0.676023	-3.47047	0.000519546	0.031951	Down
280	ENSGALG00000023703	11.8816	-3.93396	1.18271	-3.32621	0.000880341	0.0436267	Down
281	ENSGALG00000023975	5162.36	1.21033	0.345195	3.50623	0.000454507	0.030412	Up
282	ENSGALG00000024248	13.488	-6.22753	1.44441	-4.31148	1.62166e-05	0.00321455	Down
283	ENSGALG00000024328	114.258	2.59948	0.890836	2.91802	0.00352262	0.0980166	Up
284	ENSGALG00000024391	5875.76	0.758457	0.26122	2.90351	0.00368999	0.0996975	Up
285	ENSGALG00000025745	43.4985	-2.34016	0.642027	-3.64495	0.000267442	0.0236113	Down
286	ENSGALG00000025768	470.302	0.833467	0.235484	3.53937	0.000401081	0.0289787	Up
287	ENSGALG00000025780	4.64012	-6.32574	1.87306	-3.37722	0.000732213	0.0400782	Down
288	ENSGALG00000025796	58.3962	1.52039	0.411011	3.69914	0.000216327	0.0210438	Up
289	ENSGALG00000025886	1700.04	1.64326	0.429383	3.82703	0.000129699	0.0156623	Up
290	ENSGALG00000025956	17.9009	-3.05037	0.865626	-3.52389	0.000425255	0.0292397	Down
291	ENSGALG00000025960	222.091	-1.81122	0.563633	-3.21347	0.00131139	0.0557794	Down
292	ENSGALG00000025973	453.713	0.804633	0.244122	3.29603	0.00098063	0.0464077	Up
293	ENSGALG00000025977	296.179	1.48301	0.458934	3.23142	0.00123177	0.0532548	Up
294	ENSGALG00000026038	17.5434	-2.61249	0.721681	-3.62	0.000294598	0.0241801	Down
295	ENSGALG00000026077	117.812	-2.36139	0.719576	-3.28164	0.00103204	0.0479761	Down
296	ENSGALG00000026084	37.6368	2.06851	0.671667	3.07966	0.00207239	0.0735557	Up
297	ENSGALG00000026173	30.464	-4.92739	1.55767	-3.1633	0.00155992	0.0604741	Down
298	ENSGALG00000026241	230.521	1.85139	0.595165	3.11071	0.00186635	0.06854	Up
299	ENSGALG00000026499	19.3595	-3.94733	1.35857	-2.9055	0.0036667	0.099541	Down
300	ENSGALG00000026518	2708.28	2.1245	0.429903	4.94182	7.73947e-07	0.000387195	Up
301	ENSGALG00000026782	803.568	1.46128	0.45893	3.18411	0.00145202	0.0586425	Up
302	ENSGALG00000026878	567.516	0.785343	0.264194	2.9726	0.00295287	0.0902249	Up
303	ENSGALG00000026928	92.5665	2.64638	0.477858	5.53801	3.05935e-08	3.57128e-05	Up
304	ENSGALG00000026995	77.1695	-1.68845	0.457544	-3.69025	0.000224032	0.0212125	Down
305	ENSGALG00000027042	366.891	0.982626	0.3059	3.21225	0.00131702	0.0557926	Up
306	ENSGALG00000027070	24.5554	-2.14297	0.676555	-3.16747	0.00153773	0.0598346	Down
307	ENSGALG00000027201	307.957	10.4929	1.99059	5.27123	1.35513e-07	0.000101693	Up
308	ENSGALG00000027277	889.613	0.674312	0.221736	3.04106	0.00235747	0.0798346	Up
309	ENSGALG00000027308	51.8687	-3.04066	0.836834	-3.63352	0.000279579	0.0240193	Down
310	ENSGALG00000027337	266.117	-1.09169	0.346464	-3.15095	0.00162743	0.0619485	Down
311	ENSGALG00000027374	1865.52	1.34667	0.394308	3.41527	0.000637187	0.0366009	Up
312	ENSGALG00000027454	39.7752	-4.72193	0.827349	-5.7073	1.1478e-08	2.09727e-05	Down
313	ENSGALG00000027572	37.044	-3.61755	1.18226	-3.05987	0.00221435	0.0770331	Down
314	ENSGALG00000027593	240.611	-1.29893	0.241293	-5.38323	7.31596e-08	6.40512e-05	Down
315	ENSGALG00000027614	278.555	-2.37486	0.373566	-6.35727	2.0537e-10	8.2517e-07	Down
316	ENSGALG00000027618	119.689	-2.61974	0.461733	-5.67371	1.39738e-08	2.09727e-05	Down
317	ENSGALG00000027743	34438.8	1.68235	0.403008	4.17447	2.98674e-05	0.00514406	Up
318	ENSGALG00000027747	17.1526	-2.46142	0.7334	-3.35618	0.000790276	0.0421454	Down
319	ENSGALG00000027757	2987.22	1.14003	0.344895	3.30543	0.000948305	0.0455691	Up
320	ENSGALG00000027761	11.0428	-4.30835	1.3282	-3.24375	0.00117969	0.0520748	Down
321	ENSGALG00000027777	22.8703	-3.23089	0.840425	-3.84436	0.000120868	0.0147655	Down
322	ENSGALG00000027864	848.08	1.33373	0.427209	3.12196	0.00179649	0.0669288	Up
323	ENSGALG00000027892	327.456	-2.09059	0.375494	-5.56758	2.58298e-08	3.39209e-05	Down
324	ENSGALG00000027927	138.866	-3.15075	1.03804	-3.0353	0.00240294	0.0803991	Down
325	ENSGALG00000027961	39.5676	-2.84892	0.836192	-3.40702	0.000656764	0.0371231	Down
326	ENSGALG00000028024	24.4283	-2.79127	0.835344	-3.34146	0.000833388	0.0434557	Down
327	ENSGALG00000028028	93.8337	2.28764	0.765654	2.98783	0.00280968	0.0873327	Up
328	ENSGALG00000028037	7019.64	4.64463	1.39511	3.32922	0.000870881	0.0436267	Up
329	ENSGALG00000028045	227.052	1.07776	0.347505	3.10143	0.00192591	0.0690565	Up
330	ENSGALG00000028058	96.2136	6.76358	2.23977	3.01976	0.00252973	0.0822827	Up
331	ENSGALG00000028085	49.3066	-3.50341	1.02835	-3.40682	0.000657234	0.0371231	Down
332	ENSGALG00000028246	3.42963	-6.5991	2.16431	-3.04905	0.00229564	0.0788171	Down
333	ENSGALG00000028301	475.618	1.63257	0.533399	3.06069	0.00220827	0.0770331	Up
334	ENSGALG00000028318	2117.02	1.85453	0.426528	4.34796	1.37409e-05	0.0030421	Up
335	ENSGALG00000028352	3514.83	1.06898	0.307721	3.47384	0.000513061	0.031951	Up
336	ENSGALG00000028401	8473.58	1.24257	0.340071	3.65386	0.000258328	0.023	Up
337	ENSGALG00000028475	192.862	1.42664	0.369287	3.86324	0.000111895	0.0139181	Up
338	ENSGALG00000028487	91.4245	2.23728	0.680114	3.28956	0.00100343	0.0472738	Up
339	ENSGALG00000028635	27.8973	-3.83122	0.76522	-5.00669	5.53741e-07	0.000306189	Down
340	ENSGALG00000028649	547.626	-2.32389	0.366769	-6.33612	2.35628e-10	8.2517e-07	Down
341	ENSGALG00000028708	16.8189	-3.18853	1.0717	-2.9752	0.002928	0.0902099	Down
342	ENSGALG00000028773	8.42175	-5.67827	1.87818	-3.02329	0.00250044	0.081973	Down
343	ENSGALG00000028790	11.1664	-4.2471	1.03016	-4.12277	3.74347e-05	0.0060506	Down
344	ENSGALG00000029030	16.0168	-4.45623	1.15396	-3.86169	0.000112606	0.0139181	Down
345	ENSGALG00000029062	889.234	0.954156	0.319139	2.98978	0.00279178	0.0870338	Up
346	ENSGALG00000029076	1906.5	0.900444	0.267181	3.37016	0.000751234	0.0408936	Up
347	chicken_newGene_113	274.323	1.60594	0.480728	3.34065	0.000835817	0.0434557	Up
348	chicken_newGene_1289	130.928	2.17243	0.670487	3.24008	0.00119498	0.0522059	Up
349	chicken_newGene_1298	121.334	2.02733	0.508223	3.98905	6.63393e-05	0.00935638	Up
350	chicken_newGene_134	10.2734	-4.01316	1.20449	-3.33182	0.000862797	0.0436267	Down
351	chicken_newGene_1444	57.3712	3.9807	1.36971	2.90624	0.00365801	0.099541	Up
352	chicken_newGene_1492	30.5229	2.71351	0.889951	3.04905	0.00229564	0.0788171	Up
353	chicken_newGene_1905	43.7936	6.88497	1.95371	3.52404	0.00042502	0.0292397	Up
354	chicken_newGene_1980	49.479	-3.4558	0.858788	-4.02405	5.72067e-05	0.00883843	Down
355	chicken_newGene_2154	10.0797	8.42856	2.64862	3.18225	0.00146135	0.0586425	Up
356	chicken_newGene_2155	14.5568	-4.60953	1.52636	-3.01996	0.0025281	0.0822827	Down
357	chicken_newGene_2205	1903.48	1.88571	0.392379	4.80582	1.54117e-06	0.000558328	Up
358	chicken_newGene_2216	23.9391	-6.78544	2.04244	-3.32222	0.000893044	0.0438511	Down
359	chicken_newGene_2281	163.58	1.71796	0.499602	3.43865	0.00058463	0.0343136	Up
360	chicken_newGene_2322	67.6539	-4.04919	1.15808	-3.49647	0.00047145	0.0305744	Down
361	chicken_newGene_2339	71.1928	-3.36474	1.15356	-2.91685	0.00353591	0.0980166	Down
362	chicken_newGene_2963	183.88	1.94785	0.641619	3.03584	0.00239864	0.0803991	Up
363	chicken_newGene_3185	3090.38	1.74732	0.557634	3.13345	0.00172764	0.0648234	Up
364	chicken_newGene_3438	8.40404	10.3615	2.39414	4.32785	1.50571e-05	0.0030421	Up
365	chicken_newGene_3533	2.53331	9.51623	2.68085	3.5497	0.000385664	0.0289413	Up
366	chicken_newGene_3893	18556	1.81577	0.504612	3.59836	0.000320232	0.0253269	Up
367	chicken_newGene_3913	169.863	1.07735	0.361403	2.98103	0.0028728	0.0887696	Up
368	chicken_newGene_3968	338.412	0.895213	0.303435	2.95027	0.00317498	0.0934352	Up
369	chicken_newGene_3998	80.9271	3.54314	1.06138	3.33824	0.000843112	0.0434557	Up
370	chicken_newGene_40	443.164	2.36773	0.629728	3.75992	0.000169969	0.0182214	Up
371	chicken_newGene_4077	258.328	1.96899	0.551517	3.57014	0.000356796	0.027163	Up
372	chicken_newGene_4083	111.187	2.44787	0.719558	3.40191	0.00066917	0.0375952	Up
373	chicken_newGene_4176	1814.05	1.42257	0.450599	3.15706	0.00159367	0.0615512	Up
374	chicken_newGene_4230	486.355	0.80202	0.258584	3.10158	0.0019249	0.0690565	Up
375	chicken_newGene_4393	17040.9	1.72381	0.353753	4.87292	1.09959e-06	0.000444321	Up
376	chicken_newGene_4578	2.60127	-9.41399	3.2335	-2.91139	0.0035982	0.0987898	Down
377	chicken_newGene_4718	46.2087	2.87682	0.989717	2.90671	0.00365252	0.099541	Up
378	chicken_newGene_4812	271.528	1.16315	0.374081	3.10936	0.00187496	0.06854	Up
379	chicken_newGene_4835	29.4417	1.85059	0.631052	2.93255	0.00336189	0.0966571	Up
380	chicken_newGene_4914	94.5485	-2.57737	0.811393	-3.17648	0.00149073	0.0595394	Down
381	chicken_newGene_4973	149.911	4.00054	1.07553	3.7196	0.00019954	0.0200269	Up
382	chicken_newGene_5004	47.4541	-2.59583	0.887427	-2.92512	0.00344325	0.0977697	Down
383	chicken_newGene_5081	8487.12	1.6528	0.345561	4.78295	1.72737e-06	0.000604925	Up
384	chicken_newGene_5125	48.5469	-2.76503	0.595433	-4.64373	3.42182e-06	0.00103828	Down
385	chicken_newGene_5348	4034.55	0.830779	0.259257	3.20445	0.00135319	0.0564069	Up
386	chicken_newGene_5383	883.934	1.56873	0.470901	3.33134	0.000864276	0.0436267	Up
387	chicken_newGene_5655	26.3906	3.3488	1.15067	2.9103	0.00361082	0.0987898	Up
388	chicken_newGene_5831	68.8052	-3.83441	1.30356	-2.9415	0.00326632	0.095322	Down
389	chicken_newGene_635	23.3075	21.0264	7.16834	2.93323	0.00335458	0.0966571	Up
390	chicken_newGene_639	698.067	1.82753	0.546043	3.34685	0.000817341	0.0430273	Up
391	chicken_newGene_811	49.9781	3.69476	0.924846	3.995	6.46932e-05	0.00931051	Up
392	chicken_newGene_812	53.9202	3.41147	1.07539	3.17231	0.00151229	0.0598346	Up
393	chicken_newGene_813	178.838	3.56958	1.02007	3.49935	0.000466398	0.0304347	Up

## Sheet: T15 vs T6
	GeneID	baseMean	log2FoldChange	lfcSE	stat	pvalue	padj	status	deg_status
1	ENSGALG00000001886	580.632	2.15121	0.594696	3.61733	0.000297654	0.0933387	TRUE	Up
2	ENSGALG00000002043	3108.37	0.892496	0.2496	3.57571	0.000349275	0.0986024	TRUE	Up
3	ENSGALG00000002260	4992.36	2.67494	0.672742	3.97618	7.00304e-05	0.0453843	TRUE	Up
4	ENSGALG00000004170	4279.26	1.40479	0.338611	4.14869	3.34378e-05	0.032471	TRUE	Up
5	ENSGALG00000006211	16307.9	1.24468	0.33528	3.71236	0.000205337	0.0826382	TRUE	Up
6	ENSGALG00000006323	32.4625	-5.64935	1.30839	-4.31779	1.57602e-05	0.0218864	TRUE	Down
7	ENSGALG00000006630	322.964	1.64906	0.4344	3.79619	0.000146936	0.0714183	TRUE	Up
8	ENSGALG00000006897	670.529	-1.93625	0.502296	-3.8548	0.000115822	0.0592582	TRUE	Down
9	ENSGALG00000007355	2659.21	1.53757	0.375919	4.09016	4.31073e-05	0.032471	TRUE	Up
10	ENSGALG00000007531	1738.53	0.912739	0.247185	3.69253	0.000222032	0.0830144	TRUE	Up
11	ENSGALG00000008023	360.61	-1.15092	0.310754	-3.70364	0.000212525	0.0826382	TRUE	Down
12	ENSGALG00000008431	421.866	2.68831	0.621434	4.32598	1.51858e-05	0.0218864	TRUE	Up
13	ENSGALG00000010136	14.5486	-3.63288	0.97904	-3.71066	0.000206723	0.0826382	TRUE	Down
14	ENSGALG00000010174	161.712	1.32342	0.370768	3.5694	0.000357806	0.0986024	TRUE	Up
15	ENSGALG00000010175	14467	1.12085	0.314487	3.56406	0.000365156	0.0986024	TRUE	Up
16	ENSGALG00000011859	68.8399	5.03384	1.29666	3.88216	0.000103531	0.0587605	TRUE	Up
17	ENSGALG00000012994	468.71	1.42749	0.382434	3.73264	0.000189484	0.0826382	TRUE	Up
18	ENSGALG00000015122	367.395	2.07199	0.507802	4.08031	4.49751e-05	0.032471	TRUE	Up
19	ENSGALG00000016669	15.9883	-7.93386	2.02912	-3.91	9.22951e-05	0.056075	TRUE	Down
20	ENSGALG00000019325	210.162	5.62291	1.37825	4.07975	4.50838e-05	0.032471	TRUE	Up
21	ENSGALG00000023812	6.68454	-5.61175	1.5713	-3.57141	0.00035506	0.0986024	TRUE	Down
22	ENSGALG00000026518	2708.28	1.75095	0.430078	4.07124	4.67641e-05	0.032471	TRUE	Up
23	ENSGALG00000026928	92.5665	2.72068	0.483104	5.63167	1.78473e-08	0.000173494	TRUE	Up
24	ENSGALG00000027593	240.611	-0.864874	0.235518	-3.67222	0.00024045	0.0854101	TRUE	Down
25	ENSGALG00000027762	1500.74	0.531313	0.145139	3.66071	0.000251519	0.0854101	TRUE	Up
26	ENSGALG00000029112	82.2556	12.3658	2.84005	4.35408	1.3363e-05	0.0218864	TRUE	Up
27	chicken_newGene_121	1356.96	1.49556	0.328477	4.55301	5.28829e-06	0.0128519	TRUE	Up
28	chicken_newGene_2278	90.1894	3.70604	0.771878	4.80133	1.57613e-06	0.0076608	TRUE	Up
29	chicken_newGene_4083	111.187	2.96176	0.721598	4.10445	4.0528e-05	0.032471	TRUE	Up
30	chicken_newGene_41	14.574	8.63056	2.40291	3.59171	0.000328517	0.0986024	TRUE	Up
31	chicken_newGene_4936	102.098	4.44931	1.21949	3.6485	0.000263777	0.0854724	TRUE	Up
32	chicken_newGene_4973	149.911	4.17236	1.07811	3.87007	0.000108805	0.0587605	TRUE	Up
33	chicken_newGene_5216	4.30977	-9.80995	2.68223	-3.65739	0.000254798	0.0854101	TRUE	Down
34	chicken_newGene_5437	52.9493	-19.9538	4.23997	-4.70612	2.52475e-06	0.00818102	TRUE	Down
35	chicken_newGene_5716	114.223	2.95	0.794583	3.71264	0.000205108	0.0826382	TRUE	Up
36	chicken_newGene_635	23.3075	30	7.26389	4.13002	3.62738e-05	0.032471	TRUE	Up
