# Supplementary material for: Transcriptome-based biomarker gene screening and evaluation of the extracellular fatty acid-binding protein (Ex-FABP) on immune and angiogenesis-related genes in chicken erythrocytes of tibial dyschondroplasia
Source: BMC Genomics. 2022 Apr 22;23:323. doi: 10.1186/s12864-022-08494-9 (PMC9034513; doi:10.1186/s12864-022-08494-9)
Supplement: Supplementary file 2 — Additional file 2. [file 12864_2022_8494_MOESM2_ESM.xlsx]

## Sheet: DEGs
Additional file 2. Raw counts used in this study
DEGs (P value)
Number	Entrezgene_id	Ensembl_gene_id	15 Days Control 1	15 Days Control 2	15 Days Control 3	15 Days Treatment 1	15 Days Treatment 2	15 Days Treatment 3	2 Days Control 1	2 Days Control 2	2 Days Control 3	2 Days Treatment 1	2 Days Treatment 2	2 Days Treatment 3	6 Days Control 1	6 Days Control 2	6 Days Control 3	6 Days Treatment 1	6 Days Treatment 2	6 Days Treatment 3	T15_vs_T2_Pval	T15_vs_T6_Pval	T6_vs_T2_Pval	GO Term
1	426934	ENSGALG00000000003	0	0	0	0	0	0	0	0	0	0	0	0	0	0	0	0	0	0	NA	NA	NA	positive regulation of interleukin-1 secretion
2	426934	ENSGALG00000000003	0	0	0	0	0	0	0	0	0	0	0	0	0	0	0	0	0	0	NA	NA	NA	membrane
3	426934	ENSGALG00000000003	0	0	0	0	0	0	0	0	0	0	0	0	0	0	0	0	0	0	NA	NA	NA	integral component of membrane
4	426934	ENSGALG00000000003	0	0	0	0	0	0	0	0	0	0	0	0	0	0	0	0	0	0	NA	NA	NA	plasma membrane
5	426934	ENSGALG00000000003	0	0	0	0	0	0	0	0	0	0	0	0	0	0	0	0	0	0	NA	NA	NA	ion transport
6	426934	ENSGALG00000000003	0	0	0	0	0	0	0	0	0	0	0	0	0	0	0	0	0	0	NA	NA	NA	cell junction
7	426934	ENSGALG00000000003	0	0	0	0	0	0	0	0	0	0	0	0	0	0	0	0	0	0	NA	NA	NA	cation transport
8	426934	ENSGALG00000000003	0	0	0	0	0	0	0	0	0	0	0	0	0	0	0	0	0	0	NA	NA	NA	gap junction
9	426934	ENSGALG00000000003	0	0	0	0	0	0	0	0	0	0	0	0	0	0	0	0	0	0	NA	NA	NA	channel activity
10	426934	ENSGALG00000000003	0	0	0	0	0	0	0	0	0	0	0	0	0	0	0	0	0	0	NA	NA	NA	wide pore channel activity
11	426934	ENSGALG00000000003	0	0	0	0	0	0	0	0	0	0	0	0	0	0	0	0	0	0	NA	NA	NA	cell-cell signaling
12	426934	ENSGALG00000000003	0	0	0	0	0	0	0	0	0	0	0	0	0	0	0	0	0	0	NA	NA	NA	response to ischemia
13	426934	ENSGALG00000000003	0	0	0	0	0	0	0	0	0	0	0	0	0	0	0	0	0	0	NA	NA	NA	transmembrane transport
14	426934	ENSGALG00000000003	0	0	0	0	0	0	0	0	0	0	0	0	0	0	0	0	0	0	NA	NA	NA	cytoplasm
15	NA	ENSGALG00000000011	29	49	51	55	49	42	12	31	23	36	26	44	55	22	47	33	49	22	0.819327	0.956479	0.819327	ATPase activity
16	NA	ENSGALG00000000011	29	49	51	55	49	42	12	31	23	36	26	44	55	22	47	33	49	22	0.819327	0.956479	0.819327	identical protein binding
17	NA	ENSGALG00000000011	29	49	51	55	49	42	12	31	23	36	26	44	55	22	47	33	49	22	0.819327	0.956479	0.819327	cytoplasm
18	NA	ENSGALG00000000011	29	49	51	55	49	42	12	31	23	36	26	44	55	22	47	33	49	22	0.819327	0.956479	0.819327	mitochondrion
19	431235	ENSGALG00000000038	0	0	0	0	0	0	0	0	0	0	0	0	0	0	0	0	0	0	NA	NA	NA	hydrolase activity
20	431235	ENSGALG00000000038	0	0	0	0	0	0	0	0	0	0	0	0	0	0	0	0	0	0	NA	NA	NA	peptidase activity
21	431235	ENSGALG00000000038	0	0	0	0	0	0	0	0	0	0	0	0	0	0	0	0	0	0	NA	NA	NA	proteolysis
22	431235	ENSGALG00000000038	0	0	0	0	0	0	0	0	0	0	0	0	0	0	0	0	0	0	NA	NA	NA	serine-type endopeptidase activity
23	431235	ENSGALG00000000038	0	0	0	0	0	0	0	0	0	0	0	0	0	0	0	0	0	0	NA	NA	NA	serine-type peptidase activity
24	NA	ENSGALG00000000044	0	0	0	5	3	0	1	0	0	0	0	1	0	0	2	0	3	0	NA	NA	NA	extracellular region
25	NA	ENSGALG00000000044	0	0	0	5	3	0	1	0	0	0	0	1	0	0	2	0	3	0	NA	NA	NA	negative regulation of catalytic activity
26	NA	ENSGALG00000000044	0	0	0	5	3	0	1	0	0	0	0	1	0	0	2	0	3	0	NA	NA	NA	negative regulation of signaling receptor activity
27	NA	ENSGALG00000000044	0	0	0	5	3	0	1	0	0	0	0	1	0	0	2	0	3	0	NA	NA	NA	negative regulation of endopeptidase activity
28	NA	ENSGALG00000000044	0	0	0	5	3	0	1	0	0	0	0	1	0	0	2	0	3	0	NA	NA	NA	serine-type endopeptidase inhibitor activity
29	NA	ENSGALG00000000044	0	0	0	5	3	0	1	0	0	0	0	1	0	0	2	0	3	0	NA	NA	NA	metalloendopeptidase inhibitor activity
30	NA	ENSGALG00000000044	0	0	0	5	3	0	1	0	0	0	0	1	0	0	2	0	3	0	NA	NA	NA	negative regulation of transforming growth factor beta receptor signaling pathway
31	NA	ENSGALG00000000044	0	0	0	5	3	0	1	0	0	0	0	1	0	0	2	0	3	0	NA	NA	NA	receptor antagonist activity
32	NA	ENSGALG00000000044	0	0	0	5	3	0	1	0	0	0	0	1	0	0	2	0	3	0	NA	NA	NA	transforming growth factor beta binding
33	NA	ENSGALG00000000044	0	0	0	5	3	0	1	0	0	0	0	1	0	0	2	0	3	0	NA	NA	NA	skeletal system development
34	NA	ENSGALG00000000044	0	0	0	5	3	0	1	0	0	0	0	1	0	0	2	0	3	0	NA	NA	NA	negative regulation of protein binding
35	NA	ENSGALG00000000044	0	0	0	5	3	0	1	0	0	0	0	1	0	0	2	0	3	0	NA	NA	NA	negative regulation of DNA binding
36	NA	ENSGALG00000000044	0	0	0	5	3	0	1	0	0	0	0	1	0	0	2	0	3	0	NA	NA	NA	muscle fiber development
37	NA	ENSGALG00000000044	0	0	0	5	3	0	1	0	0	0	0	1	0	0	2	0	3	0	NA	NA	NA	roof of mouth development
38	NA	ENSGALG00000000044	0	0	0	5	3	0	1	0	0	0	0	1	0	0	2	0	3	0	NA	NA	NA	enzyme inhibitor activity
39	NA	ENSGALG00000000044	0	0	0	5	3	0	1	0	0	0	0	1	0	0	2	0	3	0	NA	NA	NA	protein binding
40	776719	ENSGALG00000000048	592	354	251	476	337	358	164	166	149	184	128	244	127	359	289	510	348	234	0.920944	0.938231	0.920944	proton-transporting V-type ATPase, V1 domain
41	776719	ENSGALG00000000048	592	354	251	476	337	358	164	166	149	184	128	244	127	359	289	510	348	234	0.920944	0.938231	0.920944	proton-transporting ATPase activity, rotational mechanism
42	776719	ENSGALG00000000048	592	354	251	476	337	358	164	166	149	184	128	244	127	359	289	510	348	234	0.920944	0.938231	0.920944	nucleotide binding
43	776719	ENSGALG00000000048	592	354	251	476	337	358	164	166	149	184	128	244	127	359	289	510	348	234	0.920944	0.938231	0.920944	ATP binding
44	776719	ENSGALG00000000048	592	354	251	476	337	358	164	166	149	184	128	244	127	359	289	510	348	234	0.920944	0.938231	0.920944	ion transport
45	776719	ENSGALG00000000048	592	354	251	476	337	358	164	166	149	184	128	244	127	359	289	510	348	234	0.920944	0.938231	0.920944	proton transmembrane transport
46	776719	ENSGALG00000000048	592	354	251	476	337	358	164	166	149	184	128	244	127	359	289	510	348	234	0.920944	0.938231	0.920944	ATP metabolic process
47	776719	ENSGALG00000000048	592	354	251	476	337	358	164	166	149	184	128	244	127	359	289	510	348	234	0.920944	0.938231	0.920944	proton-transporting ATP synthase activity, rotational mechanism
48	776719	ENSGALG00000000048	592	354	251	476	337	358	164	166	149	184	128	244	127	359	289	510	348	234	0.920944	0.938231	0.920944	ATP synthesis coupled proton transport
49	776719	ENSGALG00000000048	592	354	251	476	337	358	164	166	149	184	128	244	127	359	289	510	348	234	0.920944	0.938231	0.920944	plasma membrane
50	776719	ENSGALG00000000048	592	354	251	476	337	358	164	166	149	184	128	244	127	359	289	510	348	234	0.920944	0.938231	0.920944	vacuolar membrane
51	425210	ENSGALG00000000055	2415	2310	2535	2439	2454	2793	2854	2392	2655	2859	2850	2664	2923	2781	2560	2716	2646	2823	0.993774	0.956479	0.993774	regulation of TOR signaling
52	425210	ENSGALG00000000055	2415	2310	2535	2439	2454	2793	2854	2392	2655	2859	2850	2664	2923	2781	2560	2716	2646	2823	0.993774	0.956479	0.993774	cellular response to amino acid stimulus
53	425210	ENSGALG00000000055	2415	2310	2535	2439	2454	2793	2854	2392	2655	2859	2850	2664	2923	2781	2560	2716	2646	2823	0.993774	0.956479	0.993774	late endosome membrane
54	425210	ENSGALG00000000055	2415	2310	2535	2439	2454	2793	2854	2392	2655	2859	2850	2664	2923	2781	2560	2716	2646	2823	0.993774	0.956479	0.993774	positive regulation of TOR signaling
55	425210	ENSGALG00000000055	2415	2310	2535	2439	2454	2793	2854	2392	2655	2859	2850	2664	2923	2781	2560	2716	2646	2823	0.993774	0.956479	0.993774	Ragulator complex
56	425210	ENSGALG00000000055	2415	2310	2535	2439	2454	2793	2854	2392	2655	2859	2850	2664	2923	2781	2560	2716	2646	2823	0.993774	0.956479	0.993774	endosome membrane
57	425210	ENSGALG00000000055	2415	2310	2535	2439	2454	2793	2854	2392	2655	2859	2850	2664	2923	2781	2560	2716	2646	2823	0.993774	0.956479	0.993774	guanyl-nucleotide exchange factor activity
58	425210	ENSGALG00000000055	2415	2310	2535	2439	2454	2793	2854	2392	2655	2859	2850	2664	2923	2781	2560	2716	2646	2823	0.993774	0.956479	0.993774	kinase activator activity
59	425210	ENSGALG00000000055	2415	2310	2535	2439	2454	2793	2854	2392	2655	2859	2850	2664	2923	2781	2560	2716	2646	2823	0.993774	0.956479	0.993774	molecular adaptor activity
60	425210	ENSGALG00000000055	2415	2310	2535	2439	2454	2793	2854	2392	2655	2859	2850	2664	2923	2781	2560	2716	2646	2823	0.993774	0.956479	0.993774	activation of MAPKK activity
61	425210	ENSGALG00000000055	2415	2310	2535	2439	2454	2793	2854	2392	2655	2859	2850	2664	2923	2781	2560	2716	2646	2823	0.993774	0.956479	0.993774	cellular protein localization
62	425210	ENSGALG00000000055	2415	2310	2535	2439	2454	2793	2854	2392	2655	2859	2850	2664	2923	2781	2560	2716	2646	2823	0.993774	0.956479	0.993774	late endosome
63	425210	ENSGALG00000000055	2415	2310	2535	2439	2454	2793	2854	2392	2655	2859	2850	2664	2923	2781	2560	2716	2646	2823	0.993774	0.956479	0.993774	protein localization to cell junction
64	431043	ENSGALG00000000059	40	12	21	29	110	30	9	14	7	6	6	6	19	7	18	4	5	2	0.374712	0.247404	0.374712	nucleotide binding
65	431043	ENSGALG00000000059	40	12	21	29	110	30	9	14	7	6	6	6	19	7	18	4	5	2	0.374712	0.247404	0.374712	structural constituent of cytoskeleton
66	431043	ENSGALG00000000059	40	12	21	29	110	30	9	14	7	6	6	6	19	7	18	4	5	2	0.374712	0.247404	0.374712	microtubule
67	431043	ENSGALG00000000059	40	12	21	29	110	30	9	14	7	6	6	6	19	7	18	4	5	2	0.374712	0.247404	0.374712	cytoplasm
68	431043	ENSGALG00000000059	40	12	21	29	110	30	9	14	7	6	6	6	19	7	18	4	5	2	0.374712	0.247404	0.374712	axon guidance
69	431043	ENSGALG00000000059	40	12	21	29	110	30	9	14	7	6	6	6	19	7	18	4	5	2	0.374712	0.247404	0.374712	microtubule cytoskeleton organization
70	431043	ENSGALG00000000059	40	12	21	29	110	30	9	14	7	6	6	6	19	7	18	4	5	2	0.374712	0.247404	0.374712	cytoskeleton
71	431043	ENSGALG00000000059	40	12	21	29	110	30	9	14	7	6	6	6	19	7	18	4	5	2	0.374712	0.247404	0.374712	neuron differentiation
72	431043	ENSGALG00000000059	40	12	21	29	110	30	9	14	7	6	6	6	19	7	18	4	5	2	0.374712	0.247404	0.374712	GTPase activity
73	431043	ENSGALG00000000059	40	12	21	29	110	30	9	14	7	6	6	6	19	7	18	4	5	2	0.374712	0.247404	0.374712	GTP binding
74	431043	ENSGALG00000000059	40	12	21	29	110	30	9	14	7	6	6	6	19	7	18	4	5	2	0.374712	0.247404	0.374712	mitotic cell cycle
75	431043	ENSGALG00000000059	40	12	21	29	110	30	9	14	7	6	6	6	19	7	18	4	5	2	0.374712	0.247404	0.374712	microtubule-based process
76	431043	ENSGALG00000000059	40	12	21	29	110	30	9	14	7	6	6	6	19	7	18	4	5	2	0.374712	0.247404	0.374712	netrin receptor binding
77	431043	ENSGALG00000000059	40	12	21	29	110	30	9	14	7	6	6	6	19	7	18	4	5	2	0.374712	0.247404	0.374712	netrin-activated signaling pathway
78	431043	ENSGALG00000000059	40	12	21	29	110	30	9	14	7	6	6	6	19	7	18	4	5	2	0.374712	0.247404	0.374712	microtubule cytoskeleton
79	431043	ENSGALG00000000059	40	12	21	29	110	30	9	14	7	6	6	6	19	7	18	4	5	2	0.374712	0.247404	0.374712	lamellipodium
80	431043	ENSGALG00000000059	40	12	21	29	110	30	9	14	7	6	6	6	19	7	18	4	5	2	0.374712	0.247404	0.374712	filopodium
81	431043	ENSGALG00000000059	40	12	21	29	110	30	9	14	7	6	6	6	19	7	18	4	5	2	0.374712	0.247404	0.374712	axon
82	431043	ENSGALG00000000059	40	12	21	29	110	30	9	14	7	6	6	6	19	7	18	4	5	2	0.374712	0.247404	0.374712	dendrite
83	431043	ENSGALG00000000059	40	12	21	29	110	30	9	14	7	6	6	6	19	7	18	4	5	2	0.374712	0.247404	0.374712	growth cone
84	431043	ENSGALG00000000059	40	12	21	29	110	30	9	14	7	6	6	6	19	7	18	4	5	2	0.374712	0.247404	0.374712	neuronal cell body
85	431043	ENSGALG00000000059	40	12	21	29	110	30	9	14	7	6	6	6	19	7	18	4	5	2	0.374712	0.247404	0.374712	cell periphery
86	431043	ENSGALG00000000059	40	12	21	29	110	30	9	14	7	6	6	6	19	7	18	4	5	2	0.374712	0.247404	0.374712	cytoskeleton organization
87	425255	ENSGALG00000000067	2	0	7	1	0	0	2	0	0	2	2	1	1	0	0	2	0	0	NA	NA	NA	oxidation-reduction process
88	425255	ENSGALG00000000067	2	0	7	1	0	0	2	0	0	2	2	1	1	0	0	2	0	0	NA	NA	NA	oxidoreductase activity
89	425255	ENSGALG00000000067	2	0	7	1	0	0	2	0	0	2	2	1	1	0	0	2	0	0	NA	NA	NA	tetrahydrobiopterin biosynthetic process
90	425255	ENSGALG00000000067	2	0	7	1	0	0	2	0	0	2	2	1	1	0	0	2	0	0	NA	NA	NA	sepiapterin reductase activity
91	425255	ENSGALG00000000067	2	0	7	1	0	0	2	0	0	2	2	1	1	0	0	2	0	0	NA	NA	NA	nitric oxide biosynthetic process
92	425255	ENSGALG00000000067	2	0	7	1	0	0	2	0	0	2	2	1	1	0	0	2	0	0	NA	NA	NA	nucleoplasm
93	425255	ENSGALG00000000067	2	0	7	1	0	0	2	0	0	2	2	1	1	0	0	2	0	0	NA	NA	NA	cytosol
94	101750305	ENSGALG00000000071	296	313	322	263	309	274	268	192	334	310	225	393	298	403	391	393	192	382	0.777752	0.99514	0.777752	negative regulation of intrinsic apoptotic signaling pathway in response to DNA damage
95	101750305	ENSGALG00000000071	296	313	322	263	309	274	268	192	334	310	225	393	298	403	391	393	192	382	0.777752	0.99514	0.777752	nucleus
96	101750305	ENSGALG00000000071	296	313	322	263	309	274	268	192	334	310	225	393	298	403	391	393	192	382	0.777752	0.99514	0.777752	cytoplasm
97	101750305	ENSGALG00000000071	296	313	322	263	309	274	268	192	334	310	225	393	298	403	391	393	192	382	0.777752	0.99514	0.777752	mitotic cell cycle arrest
98	417039	ENSGALG00000000081	2	2	4	6	36	2	5	0	2	41	4	2	3	15	3	2	10	1	0.973884	0.81381	0.973884	oxidation-reduction process
99	417039	ENSGALG00000000081	2	2	4	6	36	2	5	0	2	41	4	2	3	15	3	2	10	1	0.973884	0.81381	0.973884	oxidoreductase activity
100	417039	ENSGALG00000000081	2	2	4	6	36	2	5	0	2	41	4	2	3	15	3	2	10	1	0.973884	0.81381	0.973884	polyamine oxidase activity
101	417039	ENSGALG00000000081	2	2	4	6	36	2	5	0	2	41	4	2	3	15	3	2	10	1	0.973884	0.81381	0.973884	L-amino-acid oxidase activity
102	417039	ENSGALG00000000081	2	2	4	6	36	2	5	0	2	41	4	2	3	15	3	2	10	1	0.973884	0.81381	0.973884	cellular amino acid catabolic process
103	417039	ENSGALG00000000081	2	2	4	6	36	2	5	0	2	41	4	2	3	15	3	2	10	1	0.973884	0.81381	0.973884	extracellular region
104	421147	ENSGALG00000000086	497	528	552	421	418	617	793	639	821	594	726	582	712	737	684	747	689	695	0.878155	0.966741	0.878155	membrane
105	421147	ENSGALG00000000086	497	528	552	421	418	617	793	639	821	594	726	582	712	737	684	747	689	695	0.878155	0.966741	0.878155	integral component of membrane
106	421147	ENSGALG00000000086	497	528	552	421	418	617	793	639	821	594	726	582	712	737	684	747	689	695	0.878155	0.966741	0.878155	mitochondrion
107	421147	ENSGALG00000000086	497	528	552	421	418	617	793	639	821	594	726	582	712	737	684	747	689	695	0.878155	0.966741	0.878155	mitochondrial inner membrane
108	421147	ENSGALG00000000086	497	528	552	421	418	617	793	639	821	594	726	582	712	737	684	747	689	695	0.878155	0.966741	0.878155	intracellular protein transport
109	421147	ENSGALG00000000086	497	528	552	421	418	617	793	639	821	594	726	582	712	737	684	747	689	695	0.878155	0.966741	0.878155	protein transport
110	421147	ENSGALG00000000086	497	528	552	421	418	617	793	639	821	594	726	582	712	737	684	747	689	695	0.878155	0.966741	0.878155	integral component of mitochondrial inner membrane
111	421147	ENSGALG00000000086	497	528	552	421	418	617	793	639	821	594	726	582	712	737	684	747	689	695	0.878155	0.966741	0.878155	P-P-bond-hydrolysis-driven protein transmembrane transporter activity
112	421147	ENSGALG00000000086	497	528	552	421	418	617	793	639	821	594	726	582	712	737	684	747	689	695	0.878155	0.966741	0.878155	protein import into mitochondrial matrix
113	421147	ENSGALG00000000086	497	528	552	421	418	617	793	639	821	594	726	582	712	737	684	747	689	695	0.878155	0.966741	0.878155	TIM23 mitochondrial import inner membrane translocase complex
114	421147	ENSGALG00000000086	497	528	552	421	418	617	793	639	821	594	726	582	712	737	684	747	689	695	0.878155	0.966741	0.878155	nucleoplasm
115	419028	ENSGALG00000000091	318	575	548	550	371	551	580	626	804	564	632	623	724	780	843	644	580	670	0.87611	0.927818	0.87611	integrator complex
116	419028	ENSGALG00000000091	318	575	548	550	371	551	580	626	804	564	632	623	724	780	843	644	580	670	0.87611	0.927818	0.87611	snRNA processing
117	419028	ENSGALG00000000091	318	575	548	550	371	551	580	626	804	564	632	623	724	780	843	644	580	670	0.87611	0.927818	0.87611	nucleus
118	419028	ENSGALG00000000091	318	575	548	550	371	551	580	626	804	564	632	623	724	780	843	644	580	670	0.87611	0.927818	0.87611	nucleolus
119	419028	ENSGALG00000000091	318	575	548	550	371	551	580	626	804	564	632	623	724	780	843	644	580	670	0.87611	0.927818	0.87611
120	421148	ENSGALG00000000094	1490	1468	1343	1484	1451	1763	1323	1077	1230	1415	1089	1269	1246	1387	1256	1340	1286	1530	0.925006	0.989378	0.925006	membrane
121	421148	ENSGALG00000000094	1490	1468	1343	1484	1451	1763	1323	1077	1230	1415	1089	1269	1246	1387	1256	1340	1286	1530	0.925006	0.989378	0.925006	integral component of membrane
122	421148	ENSGALG00000000094	1490	1468	1343	1484	1451	1763	1323	1077	1230	1415	1089	1269	1246	1387	1256	1340	1286	1530	0.925006	0.989378	0.925006	plasma membrane
123	421148	ENSGALG00000000094	1490	1468	1343	1484	1451	1763	1323	1077	1230	1415	1089	1269	1246	1387	1256	1340	1286	1530	0.925006	0.989378	0.925006	signaling receptor activity
124	421148	ENSGALG00000000094	1490	1468	1343	1484	1451	1763	1323	1077	1230	1415	1089	1269	1246	1387	1256	1340	1286	1530	0.925006	0.989378	0.925006	adiponectin-activated signaling pathway
125	421148	ENSGALG00000000094	1490	1468	1343	1484	1451	1763	1323	1077	1230	1415	1089	1269	1246	1387	1256	1340	1286	1530	0.925006	0.989378	0.925006	protein kinase binding
126	421148	ENSGALG00000000094	1490	1468	1343	1484	1451	1763	1323	1077	1230	1415	1089	1269	1246	1387	1256	1340	1286	1530	0.925006	0.989378	0.925006	identical protein binding
127	421148	ENSGALG00000000094	1490	1468	1343	1484	1451	1763	1323	1077	1230	1415	1089	1269	1246	1387	1256	1340	1286	1530	0.925006	0.989378	0.925006	adiponectin binding
128	421148	ENSGALG00000000094	1490	1468	1343	1484	1451	1763	1323	1077	1230	1415	1089	1269	1246	1387	1256	1340	1286	1530	0.925006	0.989378	0.925006	adipokinetic hormone receptor activity
129	421148	ENSGALG00000000094	1490	1468	1343	1484	1451	1763	1323	1077	1230	1415	1089	1269	1246	1387	1256	1340	1286	1530	0.925006	0.989378	0.925006	hormone-mediated signaling pathway
130	421148	ENSGALG00000000094	1490	1468	1343	1484	1451	1763	1323	1077	1230	1415	1089	1269	1246	1387	1256	1340	1286	1530	0.925006	0.989378	0.925006	negative regulation of epithelial cell migration
131	421148	ENSGALG00000000094	1490	1468	1343	1484	1451	1763	1323	1077	1230	1415	1089	1269	1246	1387	1256	1340	1286	1530	0.925006	0.989378	0.925006	negative regulation of epithelial to mesenchymal transition
132	421148	ENSGALG00000000094	1490	1468	1343	1484	1451	1763	1323	1077	1230	1415	1089	1269	1246	1387	1256	1340	1286	1530	0.925006	0.989378	0.925006	regulation of glucose metabolic process
133	421148	ENSGALG00000000094	1490	1468	1343	1484	1451	1763	1323	1077	1230	1415	1089	1269	1246	1387	1256	1340	1286	1530	0.925006	0.989378	0.925006	regulation of lipid metabolic process
134	421148	ENSGALG00000000094	1490	1468	1343	1484	1451	1763	1323	1077	1230	1415	1089	1269	1246	1387	1256	1340	1286	1530	0.925006	0.989378	0.925006	fatty acid oxidation
135	421148	ENSGALG00000000094	1490	1468	1343	1484	1451	1763	1323	1077	1230	1415	1089	1269	1246	1387	1256	1340	1286	1530	0.925006	0.989378	0.925006	glucose homeostasis
136	421148	ENSGALG00000000094	1490	1468	1343	1484	1451	1763	1323	1077	1230	1415	1089	1269	1246	1387	1256	1340	1286	1530	0.925006	0.989378	0.925006	negative regulation of receptor signaling pathway via JAK-STAT
137	421148	ENSGALG00000000094	1490	1468	1343	1484	1451	1763	1323	1077	1230	1415	1089	1269	1246	1387	1256	1340	1286	1530	0.925006	0.989378	0.925006	positive regulation of cold-induced thermogenesis
138	421148	ENSGALG00000000094	1490	1468	1343	1484	1451	1763	1323	1077	1230	1415	1089	1269	1246	1387	1256	1340	1286	1530	0.925006	0.989378	0.925006	negative regulation of NIK/NF-kappaB signaling
139	421148	ENSGALG00000000094	1490	1468	1343	1484	1451	1763	1323	1077	1230	1415	1089	1269	1246	1387	1256	1340	1286	1530	0.925006	0.989378	0.925006	intrinsic component of plasma membrane
140	421149	ENSGALG00000000102	0	0	1	0	0	0	0	2	0	0	0	0	0	0	2	0	0	0	NA	NA	NA	nucleotide binding
141	421149	ENSGALG00000000102	0	0	1	0	0	0	0	2	0	0	0	0	0	0	2	0	0	0	NA	NA	NA	ATP binding
142	421149	ENSGALG00000000102	0	0	1	0	0	0	0	2	0	0	0	0	0	0	2	0	0	0	NA	NA	NA	transferase activity
143	421149	ENSGALG00000000102	0	0	1	0	0	0	0	2	0	0	0	0	0	0	2	0	0	0	NA	NA	NA	nucleus
144	421149	ENSGALG00000000102	0	0	1	0	0	0	0	2	0	0	0	0	0	0	2	0	0	0	NA	NA	NA	chromatin binding
145	421149	ENSGALG00000000102	0	0	1	0	0	0	0	2	0	0	0	0	0	0	2	0	0	0	NA	NA	NA	ubiquitin-protein transferase activity
146	421149	ENSGALG00000000102	0	0	1	0	0	0	0	2	0	0	0	0	0	0	2	0	0	0	NA	NA	NA	ubiquitin protein ligase binding
147	421149	ENSGALG00000000102	0	0	1	0	0	0	0	2	0	0	0	0	0	0	2	0	0	0	NA	NA	NA	ubiquitin conjugating enzyme activity
148	421149	ENSGALG00000000102	0	0	1	0	0	0	0	2	0	0	0	0	0	0	2	0	0	0	NA	NA	NA	DNA repair
149	421149	ENSGALG00000000102	0	0	1	0	0	0	0	2	0	0	0	0	0	0	2	0	0	0	NA	NA	NA	protein monoubiquitination
150	421149	ENSGALG00000000102	0	0	1	0	0	0	0	2	0	0	0	0	0	0	2	0	0	0	NA	NA	NA	cellular response to DNA damage stimulus
151	421149	ENSGALG00000000102	0	0	1	0	0	0	0	2	0	0	0	0	0	0	2	0	0	0	NA	NA	NA	protein K29-linked ubiquitination
152	421149	ENSGALG00000000102	0	0	1	0	0	0	0	2	0	0	0	0	0	0	2	0	0	0	NA	NA	NA	protein K27-linked ubiquitination
153	421149	ENSGALG00000000102	0	0	1	0	0	0	0	2	0	0	0	0	0	0	2	0	0	0	NA	NA	NA	protein autoubiquitination
154	421149	ENSGALG00000000102	0	0	1	0	0	0	0	2	0	0	0	0	0	0	2	0	0	0	NA	NA	NA	protein K63-linked ubiquitination
155	421149	ENSGALG00000000102	0	0	1	0	0	0	0	2	0	0	0	0	0	0	2	0	0	0	NA	NA	NA	protein K48-linked ubiquitination
156	421149	ENSGALG00000000102	0	0	1	0	0	0	0	2	0	0	0	0	0	0	2	0	0	0	NA	NA	NA	protein K11-linked ubiquitination
157	421149	ENSGALG00000000102	0	0	1	0	0	0	0	2	0	0	0	0	0	0	2	0	0	0	NA	NA	NA	protein K6-linked ubiquitination
158	421149	ENSGALG00000000102	0	0	1	0	0	0	0	2	0	0	0	0	0	0	2	0	0	0	NA	NA	NA	nucleoplasm
159	421149	ENSGALG00000000102	0	0	1	0	0	0	0	2	0	0	0	0	0	0	2	0	0	0	NA	NA	NA	nucleolus
160	421149	ENSGALG00000000102	0	0	1	0	0	0	0	2	0	0	0	0	0	0	2	0	0	0	NA	NA	NA	protein polyubiquitination
161	395100	ENSGALG00000000104	844	826	986	901	1103	816	513	911	893	767	1094	959	551	956	818	1042	771	920	0.897047	0.9786	0.897047	protein-chromophore linkage
162	395100	ENSGALG00000000104	844	826	986	901	1103	816	513	911	893	767	1094	959	551	956	818	1042	771	920	0.897047	0.9786	0.897047	cytosol
163	395100	ENSGALG00000000104	844	826	986	901	1103	816	513	911	893	767	1094	959	551	956	818	1042	771	920	0.897047	0.9786	0.897047	nucleus
164	395100	ENSGALG00000000104	844	826	986	901	1103	816	513	911	893	767	1094	959	551	956	818	1042	771	920	0.897047	0.9786	0.897047	response to absence of light
165	417040	ENSGALG00000000107	23	3	3	6	2	0	4	9	3	7	10	26	3	4	1	0	0	0	0.384078	0.93607	0.384078	cytoplasm
166	417040	ENSGALG00000000107	23	3	3	6	2	0	4	9	3	7	10	26	3	4	1	0	0	0	0.384078	0.93607	0.384078	metal ion binding
167	417040	ENSGALG00000000107	23	3	3	6	2	0	4	9	3	7	10	26	3	4	1	0	0	0	0.384078	0.93607	0.384078	ubiquitin protein ligase activity
168	417040	ENSGALG00000000107	23	3	3	6	2	0	4	9	3	7	10	26	3	4	1	0	0	0	0.384078	0.93607	0.384078	zinc ion binding
169	417040	ENSGALG00000000107	23	3	3	6	2	0	4	9	3	7	10	26	3	4	1	0	0	0	0.384078	0.93607	0.384078	protein ubiquitination
170	417040	ENSGALG00000000107	23	3	3	6	2	0	4	9	3	7	10	26	3	4	1	0	0	0	0.384078	0.93607	0.384078	protein binding
171	769005	ENSGALG00000000109	2001	1283	1703	2079	2909	1780	1066	710	707	1092	940	597	821	1300	1205	907	1293	1101	0.768979	0.920698	0.768979	tryptophan catabolic process to kynurenine
172	769005	ENSGALG00000000109	2001	1283	1703	2079	2909	1780	1066	710	707	1092	940	597	821	1300	1205	907	1293	1101	0.768979	0.920698	0.768979	cytoplasm
173	769005	ENSGALG00000000109	2001	1283	1703	2079	2909	1780	1066	710	707	1092	940	597	821	1300	1205	907	1293	1101	0.768979	0.920698	0.768979	nucleus
174	769005	ENSGALG00000000109	2001	1283	1703	2079	2909	1780	1066	710	707	1092	940	597	821	1300	1205	907	1293	1101	0.768979	0.920698	0.768979	cytosol
175	769005	ENSGALG00000000109	2001	1283	1703	2079	2909	1780	1066	710	707	1092	940	597	821	1300	1205	907	1293	1101	0.768979	0.920698	0.768979	hydrolase activity
176	769005	ENSGALG00000000109	2001	1283	1703	2079	2909	1780	1066	710	707	1092	940	597	821	1300	1205	907	1293	1101	0.768979	0.920698	0.768979	NAD biosynthetic process
177	769005	ENSGALG00000000109	2001	1283	1703	2079	2909	1780	1066	710	707	1092	940	597	821	1300	1205	907	1293	1101	0.768979	0.920698	0.768979	tryptophan catabolic process
178	769005	ENSGALG00000000109	2001	1283	1703	2079	2909	1780	1066	710	707	1092	940	597	821	1300	1205	907	1293	1101	0.768979	0.920698	0.768979	'de novo' NAD biosynthetic process from tryptophan
179	769005	ENSGALG00000000109	2001	1283	1703	2079	2909	1780	1066	710	707	1092	940	597	821	1300	1205	907	1293	1101	0.768979	0.920698	0.768979	arylformamidase activity
180	396214	ENSGALG00000000112	0	0	0	0	0	0	0	0	0	0	0	0	0	0	0	0	0	1	NA	NA	NA	membrane
181	396214	ENSGALG00000000112	0	0	0	0	0	0	0	0	0	0	0	0	0	0	0	0	0	1	NA	NA	NA	integral component of membrane
182	396214	ENSGALG00000000112	0	0	0	0	0	0	0	0	0	0	0	0	0	0	0	0	0	1	NA	NA	NA	plasma membrane
183	396214	ENSGALG00000000112	0	0	0	0	0	0	0	0	0	0	0	0	0	0	0	0	0	1	NA	NA	NA	neuron projection development
184	396214	ENSGALG00000000112	0	0	0	0	0	0	0	0	0	0	0	0	0	0	0	0	0	1	NA	NA	NA	structural constituent of myelin sheath
185	396214	ENSGALG00000000112	0	0	0	0	0	0	0	0	0	0	0	0	0	0	0	0	0	1	NA	NA	NA	myelin sheath
186	396214	ENSGALG00000000112	0	0	0	0	0	0	0	0	0	0	0	0	0	0	0	0	0	1	NA	NA	NA	inflammatory response
187	396214	ENSGALG00000000112	0	0	0	0	0	0	0	0	0	0	0	0	0	0	0	0	0	1	NA	NA	NA	axon ensheathment
188	396214	ENSGALG00000000112	0	0	0	0	0	0	0	0	0	0	0	0	0	0	0	0	0	1	NA	NA	NA	positive regulation of gene expression
189	396214	ENSGALG00000000112	0	0	0	0	0	0	0	0	0	0	0	0	0	0	0	0	0	1	NA	NA	NA	astrocyte development
190	396214	ENSGALG00000000112	0	0	0	0	0	0	0	0	0	0	0	0	0	0	0	0	0	1	NA	NA	NA	central nervous system myelination
191	396214	ENSGALG00000000112	0	0	0	0	0	0	0	0	0	0	0	0	0	0	0	0	0	1	NA	NA	NA	myelination
192	396214	ENSGALG00000000112	0	0	0	0	0	0	0	0	0	0	0	0	0	0	0	0	0	1	NA	NA	NA	long-chain fatty acid biosynthetic process
193	396214	ENSGALG00000000112	0	0	0	0	0	0	0	0	0	0	0	0	0	0	0	0	0	1	NA	NA	NA	axon development
194	395192	ENSGALG00000000115	66	21	24	16	4	27	5	5	3	3	6	6	0	10	8	6	16	8	0.691727	0.81381	0.691727
195	395177	ENSGALG00000000120	0	0	0	0	0	0	1	0	1	0	1	0	0	0	0	1	0	0	NA	NA	NA	extracellular space
196	395177	ENSGALG00000000120	0	0	0	0	0	0	1	0	1	0	1	0	0	0	0	1	0	0	NA	NA	NA	extracellular region
197	395177	ENSGALG00000000120	0	0	0	0	0	0	1	0	1	0	1	0	0	0	0	1	0	0	NA	NA	NA	growth factor activity
198	395177	ENSGALG00000000120	0	0	0	0	0	0	1	0	1	0	1	0	0	0	0	1	0	0	NA	NA	NA	cytokine activity
199	395177	ENSGALG00000000120	0	0	0	0	0	0	1	0	1	0	1	0	0	0	0	1	0	0	NA	NA	NA	positive regulation of pathway-restricted SMAD protein phosphorylation
200	395177	ENSGALG00000000120	0	0	0	0	0	0	1	0	1	0	1	0	0	0	0	1	0	0	NA	NA	NA	SMAD protein signal transduction
201	395177	ENSGALG00000000120	0	0	0	0	0	0	1	0	1	0	1	0	0	0	0	1	0	0	NA	NA	NA	hormone activity
202	395177	ENSGALG00000000120	0	0	0	0	0	0	1	0	1	0	1	0	0	0	0	1	0	0	NA	NA	NA	telethonin binding
203	395177	ENSGALG00000000120	0	0	0	0	0	0	1	0	1	0	1	0	0	0	0	1	0	0	NA	NA	NA	receptor serine/threonine kinase binding
204	395177	ENSGALG00000000120	0	0	0	0	0	0	1	0	1	0	1	0	0	0	0	1	0	0	NA	NA	NA	heart development
205	395177	ENSGALG00000000120	0	0	0	0	0	0	1	0	1	0	1	0	0	0	0	1	0	0	NA	NA	NA	adult heart development
206	395177	ENSGALG00000000120	0	0	0	0	0	0	1	0	1	0	1	0	0	0	0	1	0	0	NA	NA	NA	negative regulation of endothelial cell migration
207	395177	ENSGALG00000000120	0	0	0	0	0	0	1	0	1	0	1	0	0	0	0	1	0	0	NA	NA	NA	positive regulation of cardiac muscle hypertrophy
208	395177	ENSGALG00000000120	0	0	0	0	0	0	1	0	1	0	1	0	0	0	0	1	0	0	NA	NA	NA	negative regulation of cardiac muscle hypertrophy
209	395177	ENSGALG00000000120	0	0	0	0	0	0	1	0	1	0	1	0	0	0	0	1	0	0	NA	NA	NA	positive regulation of gene expression
210	395177	ENSGALG00000000120	0	0	0	0	0	0	1	0	1	0	1	0	0	0	0	1	0	0	NA	NA	NA	negative regulation of cell growth
211	395177	ENSGALG00000000120	0	0	0	0	0	0	1	0	1	0	1	0	0	0	0	1	0	0	NA	NA	NA	negative regulation of cell migration
212	395177	ENSGALG00000000120	0	0	0	0	0	0	1	0	1	0	1	0	0	0	0	1	0	0	NA	NA	NA	BMP signaling pathway
213	395177	ENSGALG00000000120	0	0	0	0	0	0	1	0	1	0	1	0	0	0	0	1	0	0	NA	NA	NA	activin receptor signaling pathway
214	395177	ENSGALG00000000120	0	0	0	0	0	0	1	0	1	0	1	0	0	0	0	1	0	0	NA	NA	NA	positive regulation of transcription, DNA-templated
215	395177	ENSGALG00000000120	0	0	0	0	0	0	1	0	1	0	1	0	0	0	0	1	0	0	NA	NA	NA	atrial cardiac muscle tissue morphogenesis
216	395177	ENSGALG00000000120	0	0	0	0	0	0	1	0	1	0	1	0	0	0	0	1	0	0	NA	NA	NA	ventricular cardiac muscle tissue morphogenesis
217	395177	ENSGALG00000000120	0	0	0	0	0	0	1	0	1	0	1	0	0	0	0	1	0	0	NA	NA	NA	ventricular cardiac muscle cell development
218	395177	ENSGALG00000000120	0	0	0	0	0	0	1	0	1	0	1	0	0	0	0	1	0	0	NA	NA	NA	regulation of cardiac muscle contraction
219	395177	ENSGALG00000000120	0	0	0	0	0	0	1	0	1	0	1	0	0	0	0	1	0	0	NA	NA	NA	cardiac muscle cell proliferation
220	395177	ENSGALG00000000120	0	0	0	0	0	0	1	0	1	0	1	0	0	0	0	1	0	0	NA	NA	NA	positive regulation of cardiac muscle cell proliferation
221	395177	ENSGALG00000000120	0	0	0	0	0	0	1	0	1	0	1	0	0	0	0	1	0	0	NA	NA	NA	positive regulation of sarcomere organization
222	395177	ENSGALG00000000120	0	0	0	0	0	0	1	0	1	0	1	0	0	0	0	1	0	0	NA	NA	NA	heart trabecula formation
223	395177	ENSGALG00000000120	0	0	0	0	0	0	1	0	1	0	1	0	0	0	0	1	0	0	NA	NA	NA	pathway-restricted SMAD protein phosphorylation
224	395177	ENSGALG00000000120	0	0	0	0	0	0	1	0	1	0	1	0	0	0	0	1	0	0	NA	NA	NA	positive regulation of cartilage development
225	395177	ENSGALG00000000120	0	0	0	0	0	0	1	0	1	0	1	0	0	0	0	1	0	0	NA	NA	NA	regulation of cardiac muscle hypertrophy in response to stress
226	395177	ENSGALG00000000120	0	0	0	0	0	0	1	0	1	0	1	0	0	0	0	1	0	0	NA	NA	NA	positive regulation of cell proliferation involved in heart morphogenesis
227	395177	ENSGALG00000000120	0	0	0	0	0	0	1	0	1	0	1	0	0	0	0	1	0	0	NA	NA	NA	cytoplasm
228	395177	ENSGALG00000000120	0	0	0	0	0	0	1	0	1	0	1	0	0	0	0	1	0	0	NA	NA	NA	cell surface
229	395177	ENSGALG00000000120	0	0	0	0	0	0	1	0	1	0	1	0	0	0	0	1	0	0	NA	NA	NA	Z disc
230	395177	ENSGALG00000000120	0	0	0	0	0	0	1	0	1	0	1	0	0	0	0	1	0	0	NA	NA	NA	kidney development
231	417044	ENSGALG00000000122	3718	3149	2826	3876	2436	4270	7221	5836	7887	4627	6714	6539	5416	5883	5239	6349	5369	6433	0.652088	0.999663	0.652088	membrane
232	417044	ENSGALG00000000122	3718	3149	2826	3876	2436	4270	7221	5836	7887	4627	6714	6539	5416	5883	5239	6349	5369	6433	0.652088	0.999663	0.652088	nucleus
233	417044	ENSGALG00000000122	3718	3149	2826	3876	2436	4270	7221	5836	7887	4627	6714	6539	5416	5883	5239	6349	5369	6433	0.652088	0.999663	0.652088	signal transduction
234	417044	ENSGALG00000000122	3718	3149	2826	3876	2436	4270	7221	5836	7887	4627	6714	6539	5416	5883	5239	6349	5369	6433	0.652088	0.999663	0.652088	plasma membrane
235	417044	ENSGALG00000000122	3718	3149	2826	3876	2436	4270	7221	5836	7887	4627	6714	6539	5416	5883	5239	6349	5369	6433	0.652088	0.999663	0.652088	cytosol
236	417044	ENSGALG00000000122	3718	3149	2826	3876	2436	4270	7221	5836	7887	4627	6714	6539	5416	5883	5239	6349	5369	6433	0.652088	0.999663	0.652088	cytoplasm
237	417044	ENSGALG00000000122	3718	3149	2826	3876	2436	4270	7221	5836	7887	4627	6714	6539	5416	5883	5239	6349	5369	6433	0.652088	0.999663	0.652088	ribosome binding
238	417044	ENSGALG00000000122	3718	3149	2826	3876	2436	4270	7221	5836	7887	4627	6714	6539	5416	5883	5239	6349	5369	6433	0.652088	0.999663	0.652088	ribosome
239	417044	ENSGALG00000000122	3718	3149	2826	3876	2436	4270	7221	5836	7887	4627	6714	6539	5416	5883	5239	6349	5369	6433	0.652088	0.999663	0.652088	protein ubiquitination
240	417044	ENSGALG00000000122	3718	3149	2826	3876	2436	4270	7221	5836	7887	4627	6714	6539	5416	5883	5239	6349	5369	6433	0.652088	0.999663	0.652088	protein kinase C binding
241	417044	ENSGALG00000000122	3718	3149	2826	3876	2436	4270	7221	5836	7887	4627	6714	6539	5416	5883	5239	6349	5369	6433	0.652088	0.999663	0.652088	perinuclear region of cytoplasm
242	417044	ENSGALG00000000122	3718	3149	2826	3876	2436	4270	7221	5836	7887	4627	6714	6539	5416	5883	5239	6349	5369	6433	0.652088	0.999663	0.652088	cytosolic small ribosomal subunit
243	417044	ENSGALG00000000122	3718	3149	2826	3876	2436	4270	7221	5836	7887	4627	6714	6539	5416	5883	5239	6349	5369	6433	0.652088	0.999663	0.652088	positive regulation of protein phosphorylation
244	417044	ENSGALG00000000122	3718	3149	2826	3876	2436	4270	7221	5836	7887	4627	6714	6539	5416	5883	5239	6349	5369	6433	0.652088	0.999663	0.652088	enzyme binding
245	417044	ENSGALG00000000122	3718	3149	2826	3876	2436	4270	7221	5836	7887	4627	6714	6539	5416	5883	5239	6349	5369	6433	0.652088	0.999663	0.652088	cell projection
246	417044	ENSGALG00000000122	3718	3149	2826	3876	2436	4270	7221	5836	7887	4627	6714	6539	5416	5883	5239	6349	5369	6433	0.652088	0.999663	0.652088	rescue of stalled ribosome
247	417044	ENSGALG00000000122	3718	3149	2826	3876	2436	4270	7221	5836	7887	4627	6714	6539	5416	5883	5239	6349	5369	6433	0.652088	0.999663	0.652088	negative regulation of protein tyrosine kinase activity
248	417044	ENSGALG00000000122	3718	3149	2826	3876	2436	4270	7221	5836	7887	4627	6714	6539	5416	5883	5239	6349	5369	6433	0.652088	0.999663	0.652088	dendrite
249	417044	ENSGALG00000000122	3718	3149	2826	3876	2436	4270	7221	5836	7887	4627	6714	6539	5416	5883	5239	6349	5369	6433	0.652088	0.999663	0.652088	ion channel inhibitor activity
250	417044	ENSGALG00000000122	3718	3149	2826	3876	2436	4270	7221	5836	7887	4627	6714	6539	5416	5883	5239	6349	5369	6433	0.652088	0.999663	0.652088	cysteine-type endopeptidase activator activity involved in apoptotic process
251	417044	ENSGALG00000000122	3718	3149	2826	3876	2436	4270	7221	5836	7887	4627	6714	6539	5416	5883	5239	6349	5369	6433	0.652088	0.999663	0.652088	protein phosphatase binding
252	417044	ENSGALG00000000122	3718	3149	2826	3876	2436	4270	7221	5836	7887	4627	6714	6539	5416	5883	5239	6349	5369	6433	0.652088	0.999663	0.652088	protein tyrosine kinase inhibitor activity
253	417044	ENSGALG00000000122	3718	3149	2826	3876	2436	4270	7221	5836	7887	4627	6714	6539	5416	5883	5239	6349	5369	6433	0.652088	0.999663	0.652088	cyclin binding
254	417044	ENSGALG00000000122	3718	3149	2826	3876	2436	4270	7221	5836	7887	4627	6714	6539	5416	5883	5239	6349	5369	6433	0.652088	0.999663	0.652088	receptor tyrosine kinase binding
255	417044	ENSGALG00000000122	3718	3149	2826	3876	2436	4270	7221	5836	7887	4627	6714	6539	5416	5883	5239	6349	5369	6433	0.652088	0.999663	0.652088	signaling adaptor activity
256	417044	ENSGALG00000000122	3718	3149	2826	3876	2436	4270	7221	5836	7887	4627	6714	6539	5416	5883	5239	6349	5369	6433	0.652088	0.999663	0.652088	SH2 domain binding
257	417044	ENSGALG00000000122	3718	3149	2826	3876	2436	4270	7221	5836	7887	4627	6714	6539	5416	5883	5239	6349	5369	6433	0.652088	0.999663	0.652088	protein homodimerization activity
258	417044	ENSGALG00000000122	3718	3149	2826	3876	2436	4270	7221	5836	7887	4627	6714	6539	5416	5883	5239	6349	5369	6433	0.652088	0.999663	0.652088	translation
259	417044	ENSGALG00000000122	3718	3149	2826	3876	2436	4270	7221	5836	7887	4627	6714	6539	5416	5883	5239	6349	5369	6433	0.652088	0.999663	0.652088	activation of cysteine-type endopeptidase activity involved in apoptotic process
260	417044	ENSGALG00000000122	3718	3149	2826	3876	2436	4270	7221	5836	7887	4627	6714	6539	5416	5883	5239	6349	5369	6433	0.652088	0.999663	0.652088	negative regulation of gene expression
261	417044	ENSGALG00000000122	3718	3149	2826	3876	2436	4270	7221	5836	7887	4627	6714	6539	5416	5883	5239	6349	5369	6433	0.652088	0.999663	0.652088	negative regulation of cell growth
262	417044	ENSGALG00000000122	3718	3149	2826	3876	2436	4270	7221	5836	7887	4627	6714	6539	5416	5883	5239	6349	5369	6433	0.652088	0.999663	0.652088	positive regulation of cell migration
263	417044	ENSGALG00000000122	3718	3149	2826	3876	2436	4270	7221	5836	7887	4627	6714	6539	5416	5883	5239	6349	5369	6433	0.652088	0.999663	0.652088	positive regulation of proteasomal ubiquitin-dependent protein catabolic process
264	417044	ENSGALG00000000122	3718	3149	2826	3876	2436	4270	7221	5836	7887	4627	6714	6539	5416	5883	5239	6349	5369	6433	0.652088	0.999663	0.652088	negative regulation of peptidyl-serine phosphorylation
265	417044	ENSGALG00000000122	3718	3149	2826	3876	2436	4270	7221	5836	7887	4627	6714	6539	5416	5883	5239	6349	5369	6433	0.652088	0.999663	0.652088	positive regulation of Golgi to plasma membrane protein transport
266	417044	ENSGALG00000000122	3718	3149	2826	3876	2436	4270	7221	5836	7887	4627	6714	6539	5416	5883	5239	6349	5369	6433	0.652088	0.999663	0.652088	positive regulation of apoptotic process
267	417044	ENSGALG00000000122	3718	3149	2826	3876	2436	4270	7221	5836	7887	4627	6714	6539	5416	5883	5239	6349	5369	6433	0.652088	0.999663	0.652088	pigmentation
268	417044	ENSGALG00000000122	3718	3149	2826	3876	2436	4270	7221	5836	7887	4627	6714	6539	5416	5883	5239	6349	5369	6433	0.652088	0.999663	0.652088	positive regulation of GTPase activity
269	417044	ENSGALG00000000122	3718	3149	2826	3876	2436	4270	7221	5836	7887	4627	6714	6539	5416	5883	5239	6349	5369	6433	0.652088	0.999663	0.652088	negative regulation of phagocytosis
270	417044	ENSGALG00000000122	3718	3149	2826	3876	2436	4270	7221	5836	7887	4627	6714	6539	5416	5883	5239	6349	5369	6433	0.652088	0.999663	0.652088	positive regulation of cyclic-nucleotide phosphodiesterase activity
271	417044	ENSGALG00000000122	3718	3149	2826	3876	2436	4270	7221	5836	7887	4627	6714	6539	5416	5883	5239	6349	5369	6433	0.652088	0.999663	0.652088	regulation of cell cycle
272	417044	ENSGALG00000000122	3718	3149	2826	3876	2436	4270	7221	5836	7887	4627	6714	6539	5416	5883	5239	6349	5369	6433	0.652088	0.999663	0.652088	negative regulation of protein kinase B signaling
273	417044	ENSGALG00000000122	3718	3149	2826	3876	2436	4270	7221	5836	7887	4627	6714	6539	5416	5883	5239	6349	5369	6433	0.652088	0.999663	0.652088	positive regulation of mitochondrial depolarization
274	417044	ENSGALG00000000122	3718	3149	2826	3876	2436	4270	7221	5836	7887	4627	6714	6539	5416	5883	5239	6349	5369	6433	0.652088	0.999663	0.652088	cellular response to glucose stimulus
275	417044	ENSGALG00000000122	3718	3149	2826	3876	2436	4270	7221	5836	7887	4627	6714	6539	5416	5883	5239	6349	5369	6433	0.652088	0.999663	0.652088	cellular response to growth factor stimulus
276	417044	ENSGALG00000000122	3718	3149	2826	3876	2436	4270	7221	5836	7887	4627	6714	6539	5416	5883	5239	6349	5369	6433	0.652088	0.999663	0.652088	negative regulation of hydrogen peroxide-induced neuron death
277	417044	ENSGALG00000000122	3718	3149	2826	3876	2436	4270	7221	5836	7887	4627	6714	6539	5416	5883	5239	6349	5369	6433	0.652088	0.999663	0.652088	positive regulation of intrinsic apoptotic signaling pathway
278	417044	ENSGALG00000000122	3718	3149	2826	3876	2436	4270	7221	5836	7887	4627	6714	6539	5416	5883	5239	6349	5369	6433	0.652088	0.999663	0.652088	phagocytic cup
279	417044	ENSGALG00000000122	3718	3149	2826	3876	2436	4270	7221	5836	7887	4627	6714	6539	5416	5883	5239	6349	5369	6433	0.652088	0.999663	0.652088	nucleoplasm
280	417044	ENSGALG00000000122	3718	3149	2826	3876	2436	4270	7221	5836	7887	4627	6714	6539	5416	5883	5239	6349	5369	6433	0.652088	0.999663	0.652088	mitochondrion
281	417044	ENSGALG00000000122	3718	3149	2826	3876	2436	4270	7221	5836	7887	4627	6714	6539	5416	5883	5239	6349	5369	6433	0.652088	0.999663	0.652088	midbody
282	417044	ENSGALG00000000122	3718	3149	2826	3876	2436	4270	7221	5836	7887	4627	6714	6539	5416	5883	5239	6349	5369	6433	0.652088	0.999663	0.652088	neuron projection
283	417044	ENSGALG00000000122	3718	3149	2826	3876	2436	4270	7221	5836	7887	4627	6714	6539	5416	5883	5239	6349	5369	6433	0.652088	0.999663	0.652088	neuronal cell body
284	417044	ENSGALG00000000122	3718	3149	2826	3876	2436	4270	7221	5836	7887	4627	6714	6539	5416	5883	5239	6349	5369	6433	0.652088	0.999663	0.652088	intracellular membrane-bounded organelle
285	417044	ENSGALG00000000122	3718	3149	2826	3876	2436	4270	7221	5836	7887	4627	6714	6539	5416	5883	5239	6349	5369	6433	0.652088	0.999663	0.652088	cell body
286	417044	ENSGALG00000000122	3718	3149	2826	3876	2436	4270	7221	5836	7887	4627	6714	6539	5416	5883	5239	6349	5369	6433	0.652088	0.999663	0.652088	IRE1-RACK1-PP2A complex
287	417044	ENSGALG00000000122	3718	3149	2826	3876	2436	4270	7221	5836	7887	4627	6714	6539	5416	5883	5239	6349	5369	6433	0.652088	0.999663	0.652088	perikaryon
288	417044	ENSGALG00000000122	3718	3149	2826	3876	2436	4270	7221	5836	7887	4627	6714	6539	5416	5883	5239	6349	5369	6433	0.652088	0.999663	0.652088	negative regulation of Wnt signaling pathway
289	417044	ENSGALG00000000122	3718	3149	2826	3876	2436	4270	7221	5836	7887	4627	6714	6539	5416	5883	5239	6349	5369	6433	0.652088	0.999663	0.652088	regulation of protein localization
290	417044	ENSGALG00000000122	3718	3149	2826	3876	2436	4270	7221	5836	7887	4627	6714	6539	5416	5883	5239	6349	5369	6433	0.652088	0.999663	0.652088	regulation of cell division
291	417044	ENSGALG00000000122	3718	3149	2826	3876	2436	4270	7221	5836	7887	4627	6714	6539	5416	5883	5239	6349	5369	6433	0.652088	0.999663	0.652088	regulation of establishment of cell polarity
292	417044	ENSGALG00000000122	3718	3149	2826	3876	2436	4270	7221	5836	7887	4627	6714	6539	5416	5883	5239	6349	5369	6433	0.652088	0.999663	0.652088	positive regulation of gastrulation
293	417044	ENSGALG00000000122	3718	3149	2826	3876	2436	4270	7221	5836	7887	4627	6714	6539	5416	5883	5239	6349	5369	6433	0.652088	0.999663	0.652088	protein binding
294	417044	ENSGALG00000000122	3718	3149	2826	3876	2436	4270	7221	5836	7887	4627	6714	6539	5416	5883	5239	6349	5369	6433	0.652088	0.999663	0.652088	BH3 domain binding
295	417044	ENSGALG00000000122	3718	3149	2826	3876	2436	4270	7221	5836	7887	4627	6714	6539	5416	5883	5239	6349	5369	6433	0.652088	0.999663	0.652088	positive regulation of protein-containing complex assembly
296	417044	ENSGALG00000000122	3718	3149	2826	3876	2436	4270	7221	5836	7887	4627	6714	6539	5416	5883	5239	6349	5369	6433	0.652088	0.999663	0.652088	negative regulation of protein binding
297	425450	ENSGALG00000000129	1857	1473	1578	1799	1515	1869	1573	1142	1330	1439	1515	1303	1327	1669	1617	1661	1594	1603	0.992365	0.999702	0.992365	nucleus
298	425450	ENSGALG00000000129	1857	1473	1578	1799	1515	1869	1573	1142	1330	1439	1515	1303	1327	1669	1617	1661	1594	1603	0.992365	0.999702	0.992365	negative regulation of transcription by RNA polymerase II
299	425450	ENSGALG00000000129	1857	1473	1578	1799	1515	1869	1573	1142	1330	1439	1515	1303	1327	1669	1617	1661	1594	1603	0.992365	0.999702	0.992365	DNA-binding transcription factor activity
300	425450	ENSGALG00000000129	1857	1473	1578	1799	1515	1869	1573	1142	1330	1439	1515	1303	1327	1669	1617	1661	1594	1603	0.992365	0.999702	0.992365	protein binding
301	693259	ENSGALG00000000136	0	3	4	7	15	1	0	1	4	0	0	1	0	0	1	1	1	0	0.561732	NA	0.561732	membrane
302	693259	ENSGALG00000000136	0	3	4	7	15	1	0	1	4	0	0	1	0	0	1	1	1	0	0.561732	NA	0.561732	integral component of membrane
303	396180	ENSGALG00000000137	337	364	307	291	255	338	279	222	227	237	211	193	248	283	336	351	251	269	0.998821	0.956479	0.998821	nucleus
304	396180	ENSGALG00000000137	337	364	307	291	255	338	279	222	227	237	211	193	248	283	336	351	251	269	0.998821	0.956479	0.998821	cytoplasm
305	396180	ENSGALG00000000137	337	364	307	291	255	338	279	222	227	237	211	193	248	283	336	351	251	269	0.998821	0.956479	0.998821	cytosol
306	396180	ENSGALG00000000137	337	364	307	291	255	338	279	222	227	237	211	193	248	283	336	351	251	269	0.998821	0.956479	0.998821	RNA binding
307	396180	ENSGALG00000000137	337	364	307	291	255	338	279	222	227	237	211	193	248	283	336	351	251	269	0.998821	0.956479	0.998821	mRNA splicing, via spliceosome
308	396180	ENSGALG00000000137	337	364	307	291	255	338	279	222	227	237	211	193	248	283	336	351	251	269	0.998821	0.956479	0.998821	mRNA processing
309	396180	ENSGALG00000000137	337	364	307	291	255	338	279	222	227	237	211	193	248	283	336	351	251	269	0.998821	0.956479	0.998821	spliceosomal snRNP assembly
310	396180	ENSGALG00000000137	337	364	307	291	255	338	279	222	227	237	211	193	248	283	336	351	251	269	0.998821	0.956479	0.998821	RNA splicing
311	396180	ENSGALG00000000137	337	364	307	291	255	338	279	222	227	237	211	193	248	283	336	351	251	269	0.998821	0.956479	0.998821	U1 snRNP
312	396180	ENSGALG00000000137	337	364	307	291	255	338	279	222	227	237	211	193	248	283	336	351	251	269	0.998821	0.956479	0.998821	spliceosomal complex
313	396180	ENSGALG00000000137	337	364	307	291	255	338	279	222	227	237	211	193	248	283	336	351	251	269	0.998821	0.956479	0.998821	U2 snRNP
314	396180	ENSGALG00000000137	337	364	307	291	255	338	279	222	227	237	211	193	248	283	336	351	251	269	0.998821	0.956479	0.998821	precatalytic spliceosome
315	396180	ENSGALG00000000137	337	364	307	291	255	338	279	222	227	237	211	193	248	283	336	351	251	269	0.998821	0.956479	0.998821	U4/U6 x U5 tri-snRNP complex
316	396180	ENSGALG00000000137	337	364	307	291	255	338	279	222	227	237	211	193	248	283	336	351	251	269	0.998821	0.956479	0.998821	U5 snRNP
317	396180	ENSGALG00000000137	337	364	307	291	255	338	279	222	227	237	211	193	248	283	336	351	251	269	0.998821	0.956479	0.998821	U4 snRNP
318	396180	ENSGALG00000000137	337	364	307	291	255	338	279	222	227	237	211	193	248	283	336	351	251	269	0.998821	0.956479	0.998821	U7 snRNP
319	396180	ENSGALG00000000137	337	364	307	291	255	338	279	222	227	237	211	193	248	283	336	351	251	269	0.998821	0.956479	0.998821	U12-type spliceosomal complex
320	396180	ENSGALG00000000137	337	364	307	291	255	338	279	222	227	237	211	193	248	283	336	351	251	269	0.998821	0.956479	0.998821	telomerase holoenzyme complex
321	396180	ENSGALG00000000137	337	364	307	291	255	338	279	222	227	237	211	193	248	283	336	351	251	269	0.998821	0.956479	0.998821	methylosome
322	396180	ENSGALG00000000137	337	364	307	291	255	338	279	222	227	237	211	193	248	283	336	351	251	269	0.998821	0.956479	0.998821	pICln-Sm protein complex
323	396180	ENSGALG00000000137	337	364	307	291	255	338	279	222	227	237	211	193	248	283	336	351	251	269	0.998821	0.956479	0.998821	SMN-Sm protein complex
324	396180	ENSGALG00000000137	337	364	307	291	255	338	279	222	227	237	211	193	248	283	336	351	251	269	0.998821	0.956479	0.998821	U2-type precatalytic spliceosome
325	396180	ENSGALG00000000137	337	364	307	291	255	338	279	222	227	237	211	193	248	283	336	351	251	269	0.998821	0.956479	0.998821	U2-type catalytic step 2 spliceosome
326	396180	ENSGALG00000000137	337	364	307	291	255	338	279	222	227	237	211	193	248	283	336	351	251	269	0.998821	0.956479	0.998821	catalytic step 2 spliceosome
327	396180	ENSGALG00000000137	337	364	307	291	255	338	279	222	227	237	211	193	248	283	336	351	251	269	0.998821	0.956479	0.998821	hair cycle
328	693256	ENSGALG00000000141	528	139	670	255	235	213	118	80	83	254	130	142	223	184	158	175	130	91	0.0866203	0.956479	0.0866203	membrane
329	693256	ENSGALG00000000141	528	139	670	255	235	213	118	80	83	254	130	142	223	184	158	175	130	91	0.0866203	0.956479	0.0866203	immune response
330	693256	ENSGALG00000000141	528	139	670	255	235	213	118	80	83	254	130	142	223	184	158	175	130	91	0.0866203	0.956479	0.0866203	antigen processing and presentation
331	693256	ENSGALG00000000141	528	139	670	255	235	213	118	80	83	254	130	142	223	184	158	175	130	91	0.0866203	0.956479	0.0866203	MHC class II protein complex
332	693256	ENSGALG00000000141	528	139	670	255	235	213	118	80	83	254	130	142	223	184	158	175	130	91	0.0866203	0.956479	0.0866203	adaptive immune response
333	693256	ENSGALG00000000141	528	139	670	255	235	213	118	80	83	254	130	142	223	184	158	175	130	91	0.0866203	0.956479	0.0866203	antigen processing and presentation of peptide or polysaccharide antigen via MHC class II
334	693256	ENSGALG00000000141	528	139	670	255	235	213	118	80	83	254	130	142	223	184	158	175	130	91	0.0866203	0.956479	0.0866203	integral component of membrane
335	421152	ENSGALG00000000142	1050	1355	1216	1085	1215	1235	2584	2103	2636	1855	2514	2044	1953	1526	1442	1719	2035	1945	0.830226	0.929202	0.830226	phosphotransferase activity, for other substituted phosphate groups
336	421152	ENSGALG00000000142	1050	1355	1216	1085	1215	1235	2584	2103	2636	1855	2514	2044	1953	1526	1442	1719	2035	1945	0.830226	0.929202	0.830226	transferase activity
337	421152	ENSGALG00000000142	1050	1355	1216	1085	1215	1235	2584	2103	2636	1855	2514	2044	1953	1526	1442	1719	2035	1945	0.830226	0.929202	0.830226	membrane
338	421152	ENSGALG00000000142	1050	1355	1216	1085	1215	1235	2584	2103	2636	1855	2514	2044	1953	1526	1442	1719	2035	1945	0.830226	0.929202	0.830226	integral component of membrane
339	421152	ENSGALG00000000142	1050	1355	1216	1085	1215	1235	2584	2103	2636	1855	2514	2044	1953	1526	1442	1719	2035	1945	0.830226	0.929202	0.830226	endoplasmic reticulum membrane
340	421152	ENSGALG00000000142	1050	1355	1216	1085	1215	1235	2584	2103	2636	1855	2514	2044	1953	1526	1442	1719	2035	1945	0.830226	0.929202	0.830226	Golgi apparatus
341	421152	ENSGALG00000000142	1050	1355	1216	1085	1215	1235	2584	2103	2636	1855	2514	2044	1953	1526	1442	1719	2035	1945	0.830226	0.929202	0.830226	CDP-choline pathway
342	421152	ENSGALG00000000142	1050	1355	1216	1085	1215	1235	2584	2103	2636	1855	2514	2044	1953	1526	1442	1719	2035	1945	0.830226	0.929202	0.830226	phospholipid biosynthetic process
343	421152	ENSGALG00000000142	1050	1355	1216	1085	1215	1235	2584	2103	2636	1855	2514	2044	1953	1526	1442	1719	2035	1945	0.830226	0.929202	0.830226	phosphatidylethanolamine biosynthetic process
344	421152	ENSGALG00000000142	1050	1355	1216	1085	1215	1235	2584	2103	2636	1855	2514	2044	1953	1526	1442	1719	2035	1945	0.830226	0.929202	0.830226	ethanolaminephosphotransferase activity
345	421152	ENSGALG00000000142	1050	1355	1216	1085	1215	1235	2584	2103	2636	1855	2514	2044	1953	1526	1442	1719	2035	1945	0.830226	0.929202	0.830226	diacylglycerol cholinephosphotransferase activity
346	421152	ENSGALG00000000142	1050	1355	1216	1085	1215	1235	2584	2103	2636	1855	2514	2044	1953	1526	1442	1719	2035	1945	0.830226	0.929202	0.830226	phosphatidylcholine biosynthetic process
347	425418	ENSGALG00000000146	3252	3196	2963	3786	3326	3683	5839	4575	5079	4234	4807	4250	4725	4849	4094	4226	4984	4410	0.194468	0.914102	0.194468	DNA binding
348	425418	ENSGALG00000000146	3252	3196	2963	3786	3326	3683	5839	4575	5079	4234	4807	4250	4725	4849	4094	4226	4984	4410	0.194468	0.914102	0.194468	nucleus
349	425418	ENSGALG00000000146	3252	3196	2963	3786	3326	3683	5839	4575	5079	4234	4807	4250	4725	4849	4094	4226	4984	4410	0.194468	0.914102	0.194468	nucleic acid binding
350	425418	ENSGALG00000000146	3252	3196	2963	3786	3326	3683	5839	4575	5079	4234	4807	4250	4725	4849	4094	4226	4984	4410	0.194468	0.914102	0.194468	nucleobase-containing compound metabolic process
351	425418	ENSGALG00000000146	3252	3196	2963	3786	3326	3683	5839	4575	5079	4234	4807	4250	4725	4849	4094	4226	4984	4410	0.194468	0.914102	0.194468	transcription elongation factor complex
352	425418	ENSGALG00000000146	3252	3196	2963	3786	3326	3683	5839	4575	5079	4234	4807	4250	4725	4849	4094	4226	4984	4410	0.194468	0.914102	0.194468	transcription elongation from RNA polymerase II promoter
353	425418	ENSGALG00000000146	3252	3196	2963	3786	3326	3683	5839	4575	5079	4234	4807	4250	4725	4849	4094	4226	4984	4410	0.194468	0.914102	0.194468	transcriptionally active chromatin
354	425418	ENSGALG00000000146	3252	3196	2963	3786	3326	3683	5839	4575	5079	4234	4807	4250	4725	4849	4094	4226	4984	4410	0.194468	0.914102	0.194468	histone binding
355	425418	ENSGALG00000000146	3252	3196	2963	3786	3326	3683	5839	4575	5079	4234	4807	4250	4725	4849	4094	4226	4984	4410	0.194468	0.914102	0.194468	positive regulation of transcription elongation from RNA polymerase II promoter
356	425418	ENSGALG00000000146	3252	3196	2963	3786	3326	3683	5839	4575	5079	4234	4807	4250	4725	4849	4094	4226	4984	4410	0.194468	0.914102	0.194468	regulation of mRNA processing
357	425418	ENSGALG00000000146	3252	3196	2963	3786	3326	3683	5839	4575	5079	4234	4807	4250	4725	4849	4094	4226	4984	4410	0.194468	0.914102	0.194468	nucleosome binding
358	425418	ENSGALG00000000146	3252	3196	2963	3786	3326	3683	5839	4575	5079	4234	4807	4250	4725	4849	4094	4226	4984	4410	0.194468	0.914102	0.194468	regulation of mRNA export from nucleus
359	425418	ENSGALG00000000146	3252	3196	2963	3786	3326	3683	5839	4575	5079	4234	4807	4250	4725	4849	4094	4226	4984	4410	0.194468	0.914102	0.194468	nucleosome organization
360	425418	ENSGALG00000000146	3252	3196	2963	3786	3326	3683	5839	4575	5079	4234	4807	4250	4725	4849	4094	4226	4984	4410	0.194468	0.914102	0.194468	mRNA transcription by RNA polymerase II
361	425418	ENSGALG00000000146	3252	3196	2963	3786	3326	3683	5839	4575	5079	4234	4807	4250	4725	4849	4094	4226	4984	4410	0.194468	0.914102	0.194468	regulation of isotype switching
362	425418	ENSGALG00000000146	3252	3196	2963	3786	3326	3683	5839	4575	5079	4234	4807	4250	4725	4849	4094	4226	4984	4410	0.194468	0.914102	0.194468	regulation of muscle cell differentiation
363	425418	ENSGALG00000000146	3252	3196	2963	3786	3326	3683	5839	4575	5079	4234	4807	4250	4725	4849	4094	4226	4984	4410	0.194468	0.914102	0.194468	negative regulation of histone H3-K27 methylation
364	425418	ENSGALG00000000146	3252	3196	2963	3786	3326	3683	5839	4575	5079	4234	4807	4250	4725	4849	4094	4226	4984	4410	0.194468	0.914102	0.194468	chromatin maintenance
365	425418	ENSGALG00000000146	3252	3196	2963	3786	3326	3683	5839	4575	5079	4234	4807	4250	4725	4849	4094	4226	4984	4410	0.194468	0.914102	0.194468	blastocyst formation
366	425468	ENSGALG00000000150	1959	2149	1935	2364	2107	2401	2834	2206	2936	2380	3721	3329	2160	2818	2857	2866	2113	2441	0.967158	0.931658	0.967158	structural constituent of ribosome
367	425468	ENSGALG00000000150	1959	2149	1935	2364	2107	2401	2834	2206	2936	2380	3721	3329	2160	2818	2857	2866	2113	2441	0.967158	0.931658	0.967158	translation
368	425468	ENSGALG00000000150	1959	2149	1935	2364	2107	2401	2834	2206	2936	2380	3721	3329	2160	2818	2857	2866	2113	2441	0.967158	0.931658	0.967158	ribosome
369	425468	ENSGALG00000000150	1959	2149	1935	2364	2107	2401	2834	2206	2936	2380	3721	3329	2160	2818	2857	2866	2113	2441	0.967158	0.931658	0.967158	cytosolic large ribosomal subunit
370	425468	ENSGALG00000000150	1959	2149	1935	2364	2107	2401	2834	2206	2936	2380	3721	3329	2160	2818	2857	2866	2113	2441	0.967158	0.931658	0.967158	rRNA binding
371	425468	ENSGALG00000000150	1959	2149	1935	2364	2107	2401	2834	2206	2936	2380	3721	3329	2160	2818	2857	2866	2113	2441	0.967158	0.931658	0.967158	cytoplasmic translation
372	415600	ENSGALG00000000151	0	0	0	0	0	0	0	0	0	0	0	0	0	0	0	0	0	0	NA	NA	NA	metal ion binding
373	415600	ENSGALG00000000151	0	0	0	0	0	0	0	0	0	0	0	0	0	0	0	0	0	0	NA	NA	NA	extracellular region
374	415600	ENSGALG00000000151	0	0	0	0	0	0	0	0	0	0	0	0	0	0	0	0	0	0	NA	NA	NA	extracellular matrix
375	415600	ENSGALG00000000151	0	0	0	0	0	0	0	0	0	0	0	0	0	0	0	0	0	0	NA	NA	NA	hydrolase activity
376	415600	ENSGALG00000000151	0	0	0	0	0	0	0	0	0	0	0	0	0	0	0	0	0	0	NA	NA	NA	peptidase activity
377	415600	ENSGALG00000000151	0	0	0	0	0	0	0	0	0	0	0	0	0	0	0	0	0	0	NA	NA	NA	proteolysis
378	415600	ENSGALG00000000151	0	0	0	0	0	0	0	0	0	0	0	0	0	0	0	0	0	0	NA	NA	NA	metalloendopeptidase activity
379	415600	ENSGALG00000000151	0	0	0	0	0	0	0	0	0	0	0	0	0	0	0	0	0	0	NA	NA	NA	metallopeptidase activity
380	415600	ENSGALG00000000151	0	0	0	0	0	0	0	0	0	0	0	0	0	0	0	0	0	0	NA	NA	NA	extracellular matrix organization
381	421153	ENSGALG00000000154	155	107	161	519	142	342	1649	977	1307	632	1252	1142	743	1132	717	281	1215	1162	0.201796	0.779942	0.201796	guanyl-nucleotide exchange factor activity
382	421153	ENSGALG00000000154	155	107	161	519	142	342	1649	977	1307	632	1252	1142	743	1132	717	281	1215	1162	0.201796	0.779942	0.201796	cytosol
383	421153	ENSGALG00000000154	155	107	161	519	142	342	1649	977	1307	632	1252	1142	743	1132	717	281	1215	1162	0.201796	0.779942	0.201796	nucleoplasm
384	421153	ENSGALG00000000154	155	107	161	519	142	342	1649	977	1307	632	1252	1142	743	1132	717	281	1215	1162	0.201796	0.779942	0.201796	Rab guanyl-nucleotide exchange factor activity
385	417049	ENSGALG00000000156	184790	135685	134309	141085	197642	127761	178428	85175	80488	125431	57399	44006	99189	83364	103517	80852	118789	163439	0.657191	0.959208	0.657191	chromatin organization
386	417049	ENSGALG00000000156	184790	135685	134309	141085	197642	127761	178428	85175	80488	125431	57399	44006	99189	83364	103517	80852	118789	163439	0.657191	0.959208	0.657191	chromatin binding
387	417049	ENSGALG00000000156	184790	135685	134309	141085	197642	127761	178428	85175	80488	125431	57399	44006	99189	83364	103517	80852	118789	163439	0.657191	0.959208	0.657191	lysine-acetylated histone binding
388	417049	ENSGALG00000000156	184790	135685	134309	141085	197642	127761	178428	85175	80488	125431	57399	44006	99189	83364	103517	80852	118789	163439	0.657191	0.959208	0.657191	nucleosome assembly
389	417049	ENSGALG00000000156	184790	135685	134309	141085	197642	127761	178428	85175	80488	125431	57399	44006	99189	83364	103517	80852	118789	163439	0.657191	0.959208	0.657191	regulation of transcription by RNA polymerase II
390	417049	ENSGALG00000000156	184790	135685	134309	141085	197642	127761	178428	85175	80488	125431	57399	44006	99189	83364	103517	80852	118789	163439	0.657191	0.959208	0.657191	nucleus
391	417049	ENSGALG00000000156	184790	135685	134309	141085	197642	127761	178428	85175	80488	125431	57399	44006	99189	83364	103517	80852	118789	163439	0.657191	0.959208	0.657191	nucleoplasm
392	417049	ENSGALG00000000156	184790	135685	134309	141085	197642	127761	178428	85175	80488	125431	57399	44006	99189	83364	103517	80852	118789	163439	0.657191	0.959208	0.657191	cytoplasm
393	417049	ENSGALG00000000156	184790	135685	134309	141085	197642	127761	178428	85175	80488	125431	57399	44006	99189	83364	103517	80852	118789	163439	0.657191	0.959208	0.657191	nuclear speck
394	417049	ENSGALG00000000156	184790	135685	134309	141085	197642	127761	178428	85175	80488	125431	57399	44006	99189	83364	103517	80852	118789	163439	0.657191	0.959208	0.657191	protein binding
395	417050	ENSGALG00000000158	125	177	291	198	200	103	950	168	90	140	113	235	112	130	121	67	363	139	0.685415	0.938231	0.685415	membrane
396	417050	ENSGALG00000000158	125	177	291	198	200	103	950	168	90	140	113	235	112	130	121	67	363	139	0.685415	0.938231	0.685415	integral component of membrane
397	417050	ENSGALG00000000158	125	177	291	198	200	103	950	168	90	140	113	235	112	130	121	67	363	139	0.685415	0.938231	0.685415	immune response
398	417050	ENSGALG00000000158	125	177	291	198	200	103	950	168	90	140	113	235	112	130	121	67	363	139	0.685415	0.938231	0.685415	antigen processing and presentation
399	417050	ENSGALG00000000158	125	177	291	198	200	103	950	168	90	140	113	235	112	130	121	67	363	139	0.685415	0.938231	0.685415	MHC class II protein complex
400	417050	ENSGALG00000000158	125	177	291	198	200	103	950	168	90	140	113	235	112	130	121	67	363	139	0.685415	0.938231	0.685415	MHC class II protein complex binding
401	417050	ENSGALG00000000158	125	177	291	198	200	103	950	168	90	140	113	235	112	130	121	67	363	139	0.685415	0.938231	0.685415	peptide antigen assembly with MHC class II protein complex
402	417050	ENSGALG00000000158	125	177	291	198	200	103	950	168	90	140	113	235	112	130	121	67	363	139	0.685415	0.938231	0.685415	cell surface
403	417050	ENSGALG00000000158	125	177	291	198	200	103	950	168	90	140	113	235	112	130	121	67	363	139	0.685415	0.938231	0.685415	intracellular membrane-bounded organelle
404	415601	ENSGALG00000000161	0	3	0	0	0	0	0	3	2	0	2	1	1	0	1	1	0	0	NA	NA	NA	cytoplasm
405	415601	ENSGALG00000000161	0	3	0	0	0	0	0	3	2	0	2	1	1	0	1	1	0	0	NA	NA	NA	catalytic activity
406	421154	ENSGALG00000000164	11	3	8	5	6	9	12	1	8	9	2	3	2	5	15	1	6	12	0.948263	0.999663	0.948263	A band
407	421154	ENSGALG00000000164	11	3	8	5	6	9	12	1	8	9	2	3	2	5	15	1	6	12	0.948263	0.999663	0.948263	protein binding
408	374212	ENSGALG00000000168	0	0	1	0	0	0	0	0	0	0	0	0	0	0	0	0	0	0	NA	NA	NA	membrane
409	374212	ENSGALG00000000168	0	0	1	0	0	0	0	0	0	0	0	0	0	0	0	0	0	0	NA	NA	NA	integral component of membrane
410	374212	ENSGALG00000000168	0	0	1	0	0	0	0	0	0	0	0	0	0	0	0	0	0	0	NA	NA	NA	G protein-coupled receptor activity
411	374212	ENSGALG00000000168	0	0	1	0	0	0	0	0	0	0	0	0	0	0	0	0	0	0	NA	NA	NA	signal transduction
412	374212	ENSGALG00000000168	0	0	1	0	0	0	0	0	0	0	0	0	0	0	0	0	0	0	NA	NA	NA	G protein-coupled receptor signaling pathway
413	374212	ENSGALG00000000168	0	0	1	0	0	0	0	0	0	0	0	0	0	0	0	0	0	0	NA	NA	NA	plasma membrane
414	374212	ENSGALG00000000168	0	0	1	0	0	0	0	0	0	0	0	0	0	0	0	0	0	0	NA	NA	NA	G protein-coupled adenosine receptor activity
415	374212	ENSGALG00000000168	0	0	1	0	0	0	0	0	0	0	0	0	0	0	0	0	0	0	NA	NA	NA	G protein-coupled adenosine receptor signaling pathway
416	374212	ENSGALG00000000168	0	0	1	0	0	0	0	0	0	0	0	0	0	0	0	0	0	0	NA	NA	NA	negative regulation of leukocyte migration
417	374212	ENSGALG00000000168	0	0	1	0	0	0	0	0	0	0	0	0	0	0	0	0	0	0	NA	NA	NA	regulation of glomerular filtration
418	374212	ENSGALG00000000168	0	0	1	0	0	0	0	0	0	0	0	0	0	0	0	0	0	0	NA	NA	NA	negative regulation of inflammatory response
419	374212	ENSGALG00000000168	0	0	1	0	0	0	0	0	0	0	0	0	0	0	0	0	0	0	NA	NA	NA	regulation of sensory perception of pain
420	374212	ENSGALG00000000168	0	0	1	0	0	0	0	0	0	0	0	0	0	0	0	0	0	0	NA	NA	NA	excitatory postsynaptic potential
421	374212	ENSGALG00000000168	0	0	1	0	0	0	0	0	0	0	0	0	0	0	0	0	0	0	NA	NA	NA	negative regulation of mucus secretion
422	374212	ENSGALG00000000168	0	0	1	0	0	0	0	0	0	0	0	0	0	0	0	0	0	0	NA	NA	NA	negative regulation of long-term synaptic depression
423	374212	ENSGALG00000000168	0	0	1	0	0	0	0	0	0	0	0	0	0	0	0	0	0	0	NA	NA	NA	dendritic spine
424	374212	ENSGALG00000000168	0	0	1	0	0	0	0	0	0	0	0	0	0	0	0	0	0	0	NA	NA	NA	synapse
425	374004	ENSGALG00000000172	0	0	0	0	0	0	0	0	0	0	0	0	0	0	0	0	0	0	NA	NA	NA	nucleus
426	374004	ENSGALG00000000172	0	0	0	0	0	0	0	0	0	0	0	0	0	0	0	0	0	0	NA	NA	NA	DNA binding
427	374004	ENSGALG00000000172	0	0	0	0	0	0	0	0	0	0	0	0	0	0	0	0	0	0	NA	NA	NA	RNA polymerase II cis-regulatory region sequence-specific DNA binding
428	374004	ENSGALG00000000172	0	0	0	0	0	0	0	0	0	0	0	0	0	0	0	0	0	0	NA	NA	NA	DNA-binding transcription activator activity, RNA polymerase II-specific
429	374004	ENSGALG00000000172	0	0	0	0	0	0	0	0	0	0	0	0	0	0	0	0	0	0	NA	NA	NA	regulation of transcription, DNA-templated
430	374004	ENSGALG00000000172	0	0	0	0	0	0	0	0	0	0	0	0	0	0	0	0	0	0	NA	NA	NA	multicellular organism development
431	374004	ENSGALG00000000172	0	0	0	0	0	0	0	0	0	0	0	0	0	0	0	0	0	0	NA	NA	NA	positive regulation of transcription by RNA polymerase II
432	374004	ENSGALG00000000172	0	0	0	0	0	0	0	0	0	0	0	0	0	0	0	0	0	0	NA	NA	NA	protein dimerization activity
433	374004	ENSGALG00000000172	0	0	0	0	0	0	0	0	0	0	0	0	0	0	0	0	0	0	NA	NA	NA	DNA-binding transcription factor activity, RNA polymerase II-specific
434	374004	ENSGALG00000000172	0	0	0	0	0	0	0	0	0	0	0	0	0	0	0	0	0	0	NA	NA	NA	cell differentiation
435	374004	ENSGALG00000000172	0	0	0	0	0	0	0	0	0	0	0	0	0	0	0	0	0	0	NA	NA	NA	DNA-binding transcription factor activity
436	374004	ENSGALG00000000172	0	0	0	0	0	0	0	0	0	0	0	0	0	0	0	0	0	0	NA	NA	NA	response to heat
437	374004	ENSGALG00000000172	0	0	0	0	0	0	0	0	0	0	0	0	0	0	0	0	0	0	NA	NA	NA	muscle organ development
438	374004	ENSGALG00000000172	0	0	0	0	0	0	0	0	0	0	0	0	0	0	0	0	0	0	NA	NA	NA	RNA polymerase II regulatory region sequence-specific DNA binding
439	374004	ENSGALG00000000172	0	0	0	0	0	0	0	0	0	0	0	0	0	0	0	0	0	0	NA	NA	NA	cis-regulatory region sequence-specific DNA binding
440	374004	ENSGALG00000000172	0	0	0	0	0	0	0	0	0	0	0	0	0	0	0	0	0	0	NA	NA	NA	chromatin DNA binding
441	374004	ENSGALG00000000172	0	0	0	0	0	0	0	0	0	0	0	0	0	0	0	0	0	0	NA	NA	NA	sequence-specific DNA binding
442	374004	ENSGALG00000000172	0	0	0	0	0	0	0	0	0	0	0	0	0	0	0	0	0	0	NA	NA	NA	E-box binding
443	374004	ENSGALG00000000172	0	0	0	0	0	0	0	0	0	0	0	0	0	0	0	0	0	0	NA	NA	NA	ossification
444	374004	ENSGALG00000000172	0	0	0	0	0	0	0	0	0	0	0	0	0	0	0	0	0	0	NA	NA	NA	skeletal muscle tissue development
445	374004	ENSGALG00000000172	0	0	0	0	0	0	0	0	0	0	0	0	0	0	0	0	0	0	NA	NA	NA	negative regulation of cell population proliferation
446	374004	ENSGALG00000000172	0	0	0	0	0	0	0	0	0	0	0	0	0	0	0	0	0	0	NA	NA	NA	positive regulation of myotube differentiation
447	374004	ENSGALG00000000172	0	0	0	0	0	0	0	0	0	0	0	0	0	0	0	0	0	0	NA	NA	NA	positive regulation of muscle atrophy
448	374004	ENSGALG00000000172	0	0	0	0	0	0	0	0	0	0	0	0	0	0	0	0	0	0	NA	NA	NA	regulation of skeletal muscle satellite cell proliferation
449	374004	ENSGALG00000000172	0	0	0	0	0	0	0	0	0	0	0	0	0	0	0	0	0	0	NA	NA	NA	striated muscle atrophy
450	374004	ENSGALG00000000172	0	0	0	0	0	0	0	0	0	0	0	0	0	0	0	0	0	0	NA	NA	NA	response to denervation involved in regulation of muscle adaptation
451	374004	ENSGALG00000000172	0	0	0	0	0	0	0	0	0	0	0	0	0	0	0	0	0	0	NA	NA	NA	myotube differentiation
452	374004	ENSGALG00000000172	0	0	0	0	0	0	0	0	0	0	0	0	0	0	0	0	0	0	NA	NA	NA	myoblast differentiation
453	374004	ENSGALG00000000172	0	0	0	0	0	0	0	0	0	0	0	0	0	0	0	0	0	0	NA	NA	NA	positive regulation of myoblast differentiation
454	374004	ENSGALG00000000172	0	0	0	0	0	0	0	0	0	0	0	0	0	0	0	0	0	0	NA	NA	NA	positive regulation of transcription, DNA-templated
455	374004	ENSGALG00000000172	0	0	0	0	0	0	0	0	0	0	0	0	0	0	0	0	0	0	NA	NA	NA	skeletal muscle fiber development
456	374004	ENSGALG00000000172	0	0	0	0	0	0	0	0	0	0	0	0	0	0	0	0	0	0	NA	NA	NA	positive regulation of skeletal muscle fiber development
457	374004	ENSGALG00000000172	0	0	0	0	0	0	0	0	0	0	0	0	0	0	0	0	0	0	NA	NA	NA	transdifferentiation
458	374004	ENSGALG00000000172	0	0	0	0	0	0	0	0	0	0	0	0	0	0	0	0	0	0	NA	NA	NA	positive regulation of cell cycle arrest
459	374004	ENSGALG00000000172	0	0	0	0	0	0	0	0	0	0	0	0	0	0	0	0	0	0	NA	NA	NA	cellular response to lithium ion
460	374004	ENSGALG00000000172	0	0	0	0	0	0	0	0	0	0	0	0	0	0	0	0	0	0	NA	NA	NA	cellular response to tumor necrosis factor
461	374004	ENSGALG00000000172	0	0	0	0	0	0	0	0	0	0	0	0	0	0	0	0	0	0	NA	NA	NA	cellular response to growth factor stimulus
462	374004	ENSGALG00000000172	0	0	0	0	0	0	0	0	0	0	0	0	0	0	0	0	0	0	NA	NA	NA	cellular response to estradiol stimulus
463	374004	ENSGALG00000000172	0	0	0	0	0	0	0	0	0	0	0	0	0	0	0	0	0	0	NA	NA	NA	regulation of myoblast fusion
464	374004	ENSGALG00000000172	0	0	0	0	0	0	0	0	0	0	0	0	0	0	0	0	0	0	NA	NA	NA	nucleoplasm
465	374004	ENSGALG00000000172	0	0	0	0	0	0	0	0	0	0	0	0	0	0	0	0	0	0	NA	NA	NA	skeletal muscle cell differentiation
466	374004	ENSGALG00000000172	0	0	0	0	0	0	0	0	0	0	0	0	0	0	0	0	0	0	NA	NA	NA	positive regulation of myoblast fusion
467	374004	ENSGALG00000000172	0	0	0	0	0	0	0	0	0	0	0	0	0	0	0	0	0	0	NA	NA	NA	identical protein binding
468	374004	ENSGALG00000000172	0	0	0	0	0	0	0	0	0	0	0	0	0	0	0	0	0	0	NA	NA	NA	bHLH transcription factor binding
469	374004	ENSGALG00000000172	0	0	0	0	0	0	0	0	0	0	0	0	0	0	0	0	0	0	NA	NA	NA	response to muscle activity involved in regulation of muscle adaptation
470	374004	ENSGALG00000000172	0	0	0	0	0	0	0	0	0	0	0	0	0	0	0	0	0	0	NA	NA	NA	response to electrical stimulus involved in regulation of muscle adaptation
471	374004	ENSGALG00000000172	0	0	0	0	0	0	0	0	0	0	0	0	0	0	0	0	0	0	NA	NA	NA	muscle cell fate commitment
472	374004	ENSGALG00000000172	0	0	0	0	0	0	0	0	0	0	0	0	0	0	0	0	0	0	NA	NA	NA	transcription factor complex
473	374004	ENSGALG00000000172	0	0	0	0	0	0	0	0	0	0	0	0	0	0	0	0	0	0	NA	NA	NA	protein-DNA complex
474	374004	ENSGALG00000000172	0	0	0	0	0	0	0	0	0	0	0	0	0	0	0	0	0	0	NA	NA	NA	sequence-specific double-stranded DNA binding
475	374004	ENSGALG00000000172	0	0	0	0	0	0	0	0	0	0	0	0	0	0	0	0	0	0	NA	NA	NA	muscle cell differentiation
476	769933	ENSGALG00000000184	0	0	0	0	0	0	0	0	0	0	0	0	0	0	0	0	0	0	NA	NA	NA	fatty acid transport
477	769933	ENSGALG00000000184	0	0	0	0	0	0	0	0	0	0	0	0	0	0	0	0	0	0	NA	NA	NA	nucleotide binding
478	769933	ENSGALG00000000184	0	0	0	0	0	0	0	0	0	0	0	0	0	0	0	0	0	0	NA	NA	NA	integral component of membrane
479	769933	ENSGALG00000000184	0	0	0	0	0	0	0	0	0	0	0	0	0	0	0	0	0	0	NA	NA	NA	catalytic activity
480	769933	ENSGALG00000000184	0	0	0	0	0	0	0	0	0	0	0	0	0	0	0	0	0	0	NA	NA	NA	long-chain fatty acid metabolic process
481	769933	ENSGALG00000000184	0	0	0	0	0	0	0	0	0	0	0	0	0	0	0	0	0	0	NA	NA	NA	long-chain fatty acid-CoA ligase activity
482	769933	ENSGALG00000000184	0	0	0	0	0	0	0	0	0	0	0	0	0	0	0	0	0	0	NA	NA	NA	very long-chain fatty acid-CoA ligase activity
483	769933	ENSGALG00000000184	0	0	0	0	0	0	0	0	0	0	0	0	0	0	0	0	0	0	NA	NA	NA	long-chain fatty acid transporter activity
484	769933	ENSGALG00000000184	0	0	0	0	0	0	0	0	0	0	0	0	0	0	0	0	0	0	NA	NA	NA	long-chain fatty acid transport
485	425491	ENSGALG00000000186	7	3	3	1	1	5	2	0	1	3	0	3	5	1	1	5	1	1	0.765743	NA	0.765743	membrane
486	425491	ENSGALG00000000186	7	3	3	1	1	5	2	0	1	3	0	3	5	1	1	5	1	1	0.765743	NA	0.765743	integral component of membrane
487	425491	ENSGALG00000000186	7	3	3	1	1	5	2	0	1	3	0	3	5	1	1	5	1	1	0.765743	NA	0.765743	mitochondrion
488	425491	ENSGALG00000000186	7	3	3	1	1	5	2	0	1	3	0	3	5	1	1	5	1	1	0.765743	NA	0.765743	positive regulation of apoptotic process
489	425491	ENSGALG00000000186	7	3	3	1	1	5	2	0	1	3	0	3	5	1	1	5	1	1	0.765743	NA	0.765743	activation of cysteine-type endopeptidase activity involved in apoptotic process
490	415602	ENSGALG00000000189	1369	1583	856	760	711	682	1016	1498	921	1010	1036	1684	1926	772	1818	1599	926	943	0.384078	0.942186	0.384078	nucleotide binding
491	415602	ENSGALG00000000189	1369	1583	856	760	711	682	1016	1498	921	1010	1036	1684	1926	772	1818	1599	926	943	0.384078	0.942186	0.384078	ATP binding
492	415602	ENSGALG00000000189	1369	1583	856	760	711	682	1016	1498	921	1010	1036	1684	1926	772	1818	1599	926	943	0.384078	0.942186	0.384078	nucleus
493	415602	ENSGALG00000000189	1369	1583	856	760	711	682	1016	1498	921	1010	1036	1684	1926	772	1818	1599	926	943	0.384078	0.942186	0.384078	nucleic acid binding
494	415602	ENSGALG00000000189	1369	1583	856	760	711	682	1016	1498	921	1010	1036	1684	1926	772	1818	1599	926	943	0.384078	0.942186	0.384078	RNA binding
495	415602	ENSGALG00000000189	1369	1583	856	760	711	682	1016	1498	921	1010	1036	1684	1926	772	1818	1599	926	943	0.384078	0.942186	0.384078	helicase activity
496	415602	ENSGALG00000000189	1369	1583	856	760	711	682	1016	1498	921	1010	1036	1684	1926	772	1818	1599	926	943	0.384078	0.942186	0.384078	RNA helicase activity
497	415602	ENSGALG00000000189	1369	1583	856	760	711	682	1016	1498	921	1010	1036	1684	1926	772	1818	1599	926	943	0.384078	0.942186	0.384078	RNA-dependent ATPase activity
498	415602	ENSGALG00000000189	1369	1583	856	760	711	682	1016	1498	921	1010	1036	1684	1926	772	1818	1599	926	943	0.384078	0.942186	0.384078	3'-5' RNA helicase activity
499	415602	ENSGALG00000000189	1369	1583	856	760	711	682	1016	1498	921	1010	1036	1684	1926	772	1818	1599	926	943	0.384078	0.942186	0.384078	RNA polymerase binding
500	415602	ENSGALG00000000189	1369	1583	856	760	711	682	1016	1498	921	1010	1036	1684	1926	772	1818	1599	926	943	0.384078	0.942186	0.384078	N6-methyladenosine-containing RNA binding
501	415602	ENSGALG00000000189	1369	1583	856	760	711	682	1016	1498	921	1010	1036	1684	1926	772	1818	1599	926	943	0.384078	0.942186	0.384078	spermatid development
502	415602	ENSGALG00000000189	1369	1583	856	760	711	682	1016	1498	921	1010	1036	1684	1926	772	1818	1599	926	943	0.384078	0.942186	0.384078	response to tumor necrosis factor
503	415602	ENSGALG00000000189	1369	1583	856	760	711	682	1016	1498	921	1010	1036	1684	1926	772	1818	1599	926	943	0.384078	0.942186	0.384078	positive regulation by host of viral genome replication
504	415602	ENSGALG00000000189	1369	1583	856	760	711	682	1016	1498	921	1010	1036	1684	1926	772	1818	1599	926	943	0.384078	0.942186	0.384078	oocyte development
505	415602	ENSGALG00000000189	1369	1583	856	760	711	682	1016	1498	921	1010	1036	1684	1926	772	1818	1599	926	943	0.384078	0.942186	0.384078	germline cell cycle switching, mitotic to meiotic cell cycle
506	415602	ENSGALG00000000189	1369	1583	856	760	711	682	1016	1498	921	1010	1036	1684	1926	772	1818	1599	926	943	0.384078	0.942186	0.384078	response to interleukin-1
507	415602	ENSGALG00000000189	1369	1583	856	760	711	682	1016	1498	921	1010	1036	1684	1926	772	1818	1599	926	943	0.384078	0.942186	0.384078	cytoplasm
508	415602	ENSGALG00000000189	1369	1583	856	760	711	682	1016	1498	921	1010	1036	1684	1926	772	1818	1599	926	943	0.384078	0.942186	0.384078	endoplasmic reticulum
509	415602	ENSGALG00000000189	1369	1583	856	760	711	682	1016	1498	921	1010	1036	1684	1926	772	1818	1599	926	943	0.384078	0.942186	0.384078	ribonucleoprotein granule
510	419520	ENSGALG00000000195	479	497	494	356	503	446	632	672	696	597	623	718	606	674	558	643	581	639	0.881322	0.941681	0.881322	L-ascorbic acid transmembrane transport
511	419520	ENSGALG00000000195	479	497	494	356	503	446	632	672	696	597	623	718	606	674	558	643	581	639	0.881322	0.941681	0.881322	sodium-dependent L-ascorbate transmembrane transporter activity
512	419520	ENSGALG00000000195	479	497	494	356	503	446	632	672	696	597	623	718	606	674	558	643	581	639	0.881322	0.941681	0.881322	membrane
513	419520	ENSGALG00000000195	479	497	494	356	503	446	632	672	696	597	623	718	606	674	558	643	581	639	0.881322	0.941681	0.881322	integral component of membrane
514	419520	ENSGALG00000000195	479	497	494	356	503	446	632	672	696	597	623	718	606	674	558	643	581	639	0.881322	0.941681	0.881322	transmembrane transport
515	419520	ENSGALG00000000195	479	497	494	356	503	446	632	672	696	597	623	718	606	674	558	643	581	639	0.881322	0.941681	0.881322	transmembrane transporter activity
516	419520	ENSGALG00000000195	479	497	494	356	503	446	632	672	696	597	623	718	606	674	558	643	581	639	0.881322	0.941681	0.881322	L-ascorbic acid metabolic process
517	419520	ENSGALG00000000195	479	497	494	356	503	446	632	672	696	597	623	718	606	674	558	643	581	639	0.881322	0.941681	0.881322	skeletal muscle fiber development
518	419520	ENSGALG00000000195	479	497	494	356	503	446	632	672	696	597	623	718	606	674	558	643	581	639	0.881322	0.941681	0.881322	apical plasma membrane
519	419520	ENSGALG00000000195	479	497	494	356	503	446	632	672	696	597	623	718	606	674	558	643	581	639	0.881322	0.941681	0.881322	contractile fiber
520	419520	ENSGALG00000000195	479	497	494	356	503	446	632	672	696	597	623	718	606	674	558	643	581	639	0.881322	0.941681	0.881322	L-ascorbate:sodium symporter activity
521	419520	ENSGALG00000000195	479	497	494	356	503	446	632	672	696	597	623	718	606	674	558	643	581	639	0.881322	0.941681	0.881322	L-ascorbic acid transmembrane transporter activity
522	419520	ENSGALG00000000195	479	497	494	356	503	446	632	672	696	597	623	718	606	674	558	643	581	639	0.881322	0.941681	0.881322	transepithelial L-ascorbic acid transport
523	419520	ENSGALG00000000195	479	497	494	356	503	446	632	672	696	597	623	718	606	674	558	643	581	639	0.881322	0.941681	0.881322	cytoplasm
524	419520	ENSGALG00000000195	479	497	494	356	503	446	632	672	696	597	623	718	606	674	558	643	581	639	0.881322	0.941681	0.881322	plasma membrane
525	419520	ENSGALG00000000195	479	497	494	356	503	446	632	672	696	597	623	718	606	674	558	643	581	639	0.881322	0.941681	0.881322	basal plasma membrane
526	419520	ENSGALG00000000195	479	497	494	356	503	446	632	672	696	597	623	718	606	674	558	643	581	639	0.881322	0.941681	0.881322	basolateral plasma membrane
527	419939	ENSGALG00000000201	548	404	591	426	347	693	806	1015	852	929	774	857	741	878	863	1125	995	1114	0.997952	0.85699	0.997952	endosome
528	419939	ENSGALG00000000201	548	404	591	426	347	693	806	1015	852	929	774	857	741	878	863	1125	995	1114	0.997952	0.85699	0.997952	autophagy
529	419939	ENSGALG00000000201	548	404	591	426	347	693	806	1015	852	929	774	857	741	878	863	1125	995	1114	0.997952	0.85699	0.997952	lysosome
530	419939	ENSGALG00000000201	548	404	591	426	347	693	806	1015	852	929	774	857	741	878	863	1125	995	1114	0.997952	0.85699	0.997952	lysosome localization
531	419939	ENSGALG00000000201	548	404	591	426	347	693	806	1015	852	929	774	857	741	878	863	1125	995	1114	0.997952	0.85699	0.997952	positive regulation of bone resorption
532	419939	ENSGALG00000000201	548	404	591	426	347	693	806	1015	852	929	774	857	741	878	863	1125	995	1114	0.997952	0.85699	0.997952	positive regulation of ruffle assembly
533	419939	ENSGALG00000000201	548	404	591	426	347	693	806	1015	852	929	774	857	741	878	863	1125	995	1114	0.997952	0.85699	0.997952	nucleolus
534	419939	ENSGALG00000000201	548	404	591	426	347	693	806	1015	852	929	774	857	741	878	863	1125	995	1114	0.997952	0.85699	0.997952	intracellular membrane-bounded organelle
535	415603	ENSGALG00000000208	0	0	0	0	0	0	0	0	0	0	0	1	0	0	1	0	0	0	NA	NA	NA	calcium ion binding
536	415603	ENSGALG00000000208	0	0	0	0	0	0	0	0	0	0	0	1	0	0	1	0	0	0	NA	NA	NA	negative regulation of epithelial cell migration
537	415603	ENSGALG00000000208	0	0	0	0	0	0	0	0	0	0	0	1	0	0	1	0	0	0	NA	NA	NA	establishment of protein localization
538	415603	ENSGALG00000000208	0	0	0	0	0	0	0	0	0	0	0	1	0	0	1	0	0	0	NA	NA	NA	negative regulation of epithelial cell proliferation
539	415603	ENSGALG00000000208	0	0	0	0	0	0	0	0	0	0	0	1	0	0	1	0	0	0	NA	NA	NA	negative regulation of canonical Wnt signaling pathway
540	415603	ENSGALG00000000208	0	0	0	0	0	0	0	0	0	0	0	1	0	0	1	0	0	0	NA	NA	NA	nucleus
541	415603	ENSGALG00000000208	0	0	0	0	0	0	0	0	0	0	0	1	0	0	1	0	0	0	NA	NA	NA	nucleoplasm
542	415603	ENSGALG00000000208	0	0	0	0	0	0	0	0	0	0	0	1	0	0	1	0	0	0	NA	NA	NA	cytoplasm
543	415603	ENSGALG00000000208	0	0	0	0	0	0	0	0	0	0	0	1	0	0	1	0	0	0	NA	NA	NA	cytosol
544	415603	ENSGALG00000000208	0	0	0	0	0	0	0	0	0	0	0	1	0	0	1	0	0	0	NA	NA	NA	plasma membrane
545	415603	ENSGALG00000000208	0	0	0	0	0	0	0	0	0	0	0	1	0	0	1	0	0	0	NA	NA	NA	cytoplasmic ribonucleoprotein granule
546	415603	ENSGALG00000000208	0	0	0	0	0	0	0	0	0	0	0	1	0	0	1	0	0	0	NA	NA	NA
547	396452	ENSGALG00000000209	56	15	39	20	21	17	13	5	10	46	14	27	9	19	13	9	12	22	0.0980166	0.920698	0.0980166	membrane
548	396452	ENSGALG00000000209	56	15	39	20	21	17	13	5	10	46	14	27	9	19	13	9	12	22	0.0980166	0.920698	0.0980166	nucleus
549	396452	ENSGALG00000000209	56	15	39	20	21	17	13	5	10	46	14	27	9	19	13	9	12	22	0.0980166	0.920698	0.0980166	cytoplasm
550	396452	ENSGALG00000000209	56	15	39	20	21	17	13	5	10	46	14	27	9	19	13	9	12	22	0.0980166	0.920698	0.0980166	metal ion binding
551	396452	ENSGALG00000000209	56	15	39	20	21	17	13	5	10	46	14	27	9	19	13	9	12	22	0.0980166	0.920698	0.0980166	plasma membrane
552	396452	ENSGALG00000000209	56	15	39	20	21	17	13	5	10	46	14	27	9	19	13	9	12	22	0.0980166	0.920698	0.0980166	anchored component of membrane
553	396452	ENSGALG00000000209	56	15	39	20	21	17	13	5	10	46	14	27	9	19	13	9	12	22	0.0980166	0.920698	0.0980166	calcium ion binding
554	396452	ENSGALG00000000209	56	15	39	20	21	17	13	5	10	46	14	27	9	19	13	9	12	22	0.0980166	0.920698	0.0980166	protein homooligomerization
555	396452	ENSGALG00000000209	56	15	39	20	21	17	13	5	10	46	14	27	9	19	13	9	12	22	0.0980166	0.920698	0.0980166	protein binding
556	396452	ENSGALG00000000209	56	15	39	20	21	17	13	5	10	46	14	27	9	19	13	9	12	22	0.0980166	0.920698	0.0980166	negative regulation of endopeptidase activity
557	396452	ENSGALG00000000209	56	15	39	20	21	17	13	5	10	46	14	27	9	19	13	9	12	22	0.0980166	0.920698	0.0980166	positive regulation of gene expression
558	396452	ENSGALG00000000209	56	15	39	20	21	17	13	5	10	46	14	27	9	19	13	9	12	22	0.0980166	0.920698	0.0980166	basement membrane
559	396452	ENSGALG00000000209	56	15	39	20	21	17	13	5	10	46	14	27	9	19	13	9	12	22	0.0980166	0.920698	0.0980166	amyloid-beta binding
560	396452	ENSGALG00000000209	56	15	39	20	21	17	13	5	10	46	14	27	9	19	13	9	12	22	0.0980166	0.920698	0.0980166	protease binding
561	396452	ENSGALG00000000209	56	15	39	20	21	17	13	5	10	46	14	27	9	19	13	9	12	22	0.0980166	0.920698	0.0980166	copper ion binding
562	396452	ENSGALG00000000209	56	15	39	20	21	17	13	5	10	46	14	27	9	19	13	9	12	22	0.0980166	0.920698	0.0980166	glycosaminoglycan binding
563	396452	ENSGALG00000000209	56	15	39	20	21	17	13	5	10	46	14	27	9	19	13	9	12	22	0.0980166	0.920698	0.0980166	microtubule binding
564	396452	ENSGALG00000000209	56	15	39	20	21	17	13	5	10	46	14	27	9	19	13	9	12	22	0.0980166	0.920698	0.0980166	tubulin binding
565	396452	ENSGALG00000000209	56	15	39	20	21	17	13	5	10	46	14	27	9	19	13	9	12	22	0.0980166	0.920698	0.0980166	aspartic-type endopeptidase inhibitor activity
566	396452	ENSGALG00000000209	56	15	39	20	21	17	13	5	10	46	14	27	9	19	13	9	12	22	0.0980166	0.920698	0.0980166	type 5 metabotropic glutamate receptor binding
567	396452	ENSGALG00000000209	56	15	39	20	21	17	13	5	10	46	14	27	9	19	13	9	12	22	0.0980166	0.920698	0.0980166	signaling receptor activity
568	396452	ENSGALG00000000209	56	15	39	20	21	17	13	5	10	46	14	27	9	19	13	9	12	22	0.0980166	0.920698	0.0980166	identical protein binding
569	396452	ENSGALG00000000209	56	15	39	20	21	17	13	5	10	46	14	27	9	19	13	9	12	22	0.0980166	0.920698	0.0980166	protein-containing complex binding
570	396452	ENSGALG00000000209	56	15	39	20	21	17	13	5	10	46	14	27	9	19	13	9	12	22	0.0980166	0.920698	0.0980166	cupric ion binding
571	396452	ENSGALG00000000209	56	15	39	20	21	17	13	5	10	46	14	27	9	19	13	9	12	22	0.0980166	0.920698	0.0980166	cuprous ion binding
572	396452	ENSGALG00000000209	56	15	39	20	21	17	13	5	10	46	14	27	9	19	13	9	12	22	0.0980166	0.920698	0.0980166	negative regulation of protein phosphorylation
573	396452	ENSGALG00000000209	56	15	39	20	21	17	13	5	10	46	14	27	9	19	13	9	12	22	0.0980166	0.920698	0.0980166	response to oxidative stress
574	396452	ENSGALG00000000209	56	15	39	20	21	17	13	5	10	46	14	27	9	19	13	9	12	22	0.0980166	0.920698	0.0980166	learning or memory
575	396452	ENSGALG00000000209	56	15	39	20	21	17	13	5	10	46	14	27	9	19	13	9	12	22	0.0980166	0.920698	0.0980166	positive regulation of receptor biosynthetic process
576	396452	ENSGALG00000000209	56	15	39	20	21	17	13	5	10	46	14	27	9	19	13	9	12	22	0.0980166	0.920698	0.0980166	positive regulation of cell death
577	396452	ENSGALG00000000209	56	15	39	20	21	17	13	5	10	46	14	27	9	19	13	9	12	22	0.0980166	0.920698	0.0980166	protein destabilization
578	396452	ENSGALG00000000209	56	15	39	20	21	17	13	5	10	46	14	27	9	19	13	9	12	22	0.0980166	0.920698	0.0980166	activation of protein kinase activity
579	396452	ENSGALG00000000209	56	15	39	20	21	17	13	5	10	46	14	27	9	19	13	9	12	22	0.0980166	0.920698	0.0980166	negative regulation of interferon-gamma production
580	396452	ENSGALG00000000209	56	15	39	20	21	17	13	5	10	46	14	27	9	19	13	9	12	22	0.0980166	0.920698	0.0980166	negative regulation of interleukin-17 production
581	396452	ENSGALG00000000209	56	15	39	20	21	17	13	5	10	46	14	27	9	19	13	9	12	22	0.0980166	0.920698	0.0980166	negative regulation of interleukin-2 production
582	396452	ENSGALG00000000209	56	15	39	20	21	17	13	5	10	46	14	27	9	19	13	9	12	22	0.0980166	0.920698	0.0980166	regulation of protein localization
583	396452	ENSGALG00000000209	56	15	39	20	21	17	13	5	10	46	14	27	9	19	13	9	12	22	0.0980166	0.920698	0.0980166	calcium-mediated signaling using intracellular calcium source
584	396452	ENSGALG00000000209	56	15	39	20	21	17	13	5	10	46	14	27	9	19	13	9	12	22	0.0980166	0.920698	0.0980166	cellular response to drug
585	396452	ENSGALG00000000209	56	15	39	20	21	17	13	5	10	46	14	27	9	19	13	9	12	22	0.0980166	0.920698	0.0980166	negative regulation of apoptotic process
586	396452	ENSGALG00000000209	56	15	39	20	21	17	13	5	10	46	14	27	9	19	13	9	12	22	0.0980166	0.920698	0.0980166	negative regulation of DNA-binding transcription factor activity
587	396452	ENSGALG00000000209	56	15	39	20	21	17	13	5	10	46	14	27	9	19	13	9	12	22	0.0980166	0.920698	0.0980166	positive regulation of neuron apoptotic process
588	396452	ENSGALG00000000209	56	15	39	20	21	17	13	5	10	46	14	27	9	19	13	9	12	22	0.0980166	0.920698	0.0980166	negative regulation of activated T cell proliferation
589	396452	ENSGALG00000000209	56	15	39	20	21	17	13	5	10	46	14	27	9	19	13	9	12	22	0.0980166	0.920698	0.0980166	regulation of peptidyl-tyrosine phosphorylation
590	396452	ENSGALG00000000209	56	15	39	20	21	17	13	5	10	46	14	27	9	19	13	9	12	22	0.0980166	0.920698	0.0980166	positive regulation of peptidyl-tyrosine phosphorylation
591	396452	ENSGALG00000000209	56	15	39	20	21	17	13	5	10	46	14	27	9	19	13	9	12	22	0.0980166	0.920698	0.0980166	negative regulation of T cell receptor signaling pathway
592	396452	ENSGALG00000000209	56	15	39	20	21	17	13	5	10	46	14	27	9	19	13	9	12	22	0.0980166	0.920698	0.0980166	positive regulation of protein tyrosine kinase activity
593	396452	ENSGALG00000000209	56	15	39	20	21	17	13	5	10	46	14	27	9	19	13	9	12	22	0.0980166	0.920698	0.0980166	negative regulation of calcineurin-NFAT signaling cascade
594	396452	ENSGALG00000000209	56	15	39	20	21	17	13	5	10	46	14	27	9	19	13	9	12	22	0.0980166	0.920698	0.0980166	cellular response to copper ion
595	396452	ENSGALG00000000209	56	15	39	20	21	17	13	5	10	46	14	27	9	19	13	9	12	22	0.0980166	0.920698	0.0980166	positive regulation of protein targeting to membrane
596	396452	ENSGALG00000000209	56	15	39	20	21	17	13	5	10	46	14	27	9	19	13	9	12	22	0.0980166	0.920698	0.0980166	modulation of age-related behavioral decline
597	396452	ENSGALG00000000209	56	15	39	20	21	17	13	5	10	46	14	27	9	19	13	9	12	22	0.0980166	0.920698	0.0980166	protein insertion into plasma membrane
598	396452	ENSGALG00000000209	56	15	39	20	21	17	13	5	10	46	14	27	9	19	13	9	12	22	0.0980166	0.920698	0.0980166	regulation of glutamate receptor signaling pathway
599	396452	ENSGALG00000000209	56	15	39	20	21	17	13	5	10	46	14	27	9	19	13	9	12	22	0.0980166	0.920698	0.0980166	positive regulation of neuron death
600	396452	ENSGALG00000000209	56	15	39	20	21	17	13	5	10	46	14	27	9	19	13	9	12	22	0.0980166	0.920698	0.0980166	regulation of potassium ion transmembrane transport
601	396452	ENSGALG00000000209	56	15	39	20	21	17	13	5	10	46	14	27	9	19	13	9	12	22	0.0980166	0.920698	0.0980166	negative regulation of amyloid-beta formation
602	396452	ENSGALG00000000209	56	15	39	20	21	17	13	5	10	46	14	27	9	19	13	9	12	22	0.0980166	0.920698	0.0980166	regulation of intracellular calcium activated chloride channel activity
603	396452	ENSGALG00000000209	56	15	39	20	21	17	13	5	10	46	14	27	9	19	13	9	12	22	0.0980166	0.920698	0.0980166	negative regulation of dendritic spine maintenance
604	396452	ENSGALG00000000209	56	15	39	20	21	17	13	5	10	46	14	27	9	19	13	9	12	22	0.0980166	0.920698	0.0980166	negative regulation of amyloid precursor protein catabolic process
605	396452	ENSGALG00000000209	56	15	39	20	21	17	13	5	10	46	14	27	9	19	13	9	12	22	0.0980166	0.920698	0.0980166	positive regulation of protein localization to plasma membrane
606	396452	ENSGALG00000000209	56	15	39	20	21	17	13	5	10	46	14	27	9	19	13	9	12	22	0.0980166	0.920698	0.0980166	response to amyloid-beta
607	396452	ENSGALG00000000209	56	15	39	20	21	17	13	5	10	46	14	27	9	19	13	9	12	22	0.0980166	0.920698	0.0980166	cellular response to amyloid-beta
608	396452	ENSGALG00000000209	56	15	39	20	21	17	13	5	10	46	14	27	9	19	13	9	12	22	0.0980166	0.920698	0.0980166	regulation of calcium ion import across plasma membrane
609	396452	ENSGALG00000000209	56	15	39	20	21	17	13	5	10	46	14	27	9	19	13	9	12	22	0.0980166	0.920698	0.0980166	neuron projection maintenance
610	396452	ENSGALG00000000209	56	15	39	20	21	17	13	5	10	46	14	27	9	19	13	9	12	22	0.0980166	0.920698	0.0980166	endoplasmic reticulum
611	396452	ENSGALG00000000209	56	15	39	20	21	17	13	5	10	46	14	27	9	19	13	9	12	22	0.0980166	0.920698	0.0980166	Golgi apparatus
612	396452	ENSGALG00000000209	56	15	39	20	21	17	13	5	10	46	14	27	9	19	13	9	12	22	0.0980166	0.920698	0.0980166	cytosol
613	396452	ENSGALG00000000209	56	15	39	20	21	17	13	5	10	46	14	27	9	19	13	9	12	22	0.0980166	0.920698	0.0980166	cell surface
614	396452	ENSGALG00000000209	56	15	39	20	21	17	13	5	10	46	14	27	9	19	13	9	12	22	0.0980166	0.920698	0.0980166	inclusion body
615	396452	ENSGALG00000000209	56	15	39	20	21	17	13	5	10	46	14	27	9	19	13	9	12	22	0.0980166	0.920698	0.0980166	dendrite
616	396452	ENSGALG00000000209	56	15	39	20	21	17	13	5	10	46	14	27	9	19	13	9	12	22	0.0980166	0.920698	0.0980166	nuclear membrane
617	396452	ENSGALG00000000209	56	15	39	20	21	17	13	5	10	46	14	27	9	19	13	9	12	22	0.0980166	0.920698	0.0980166	synaptic cleft
618	396452	ENSGALG00000000209	56	15	39	20	21	17	13	5	10	46	14	27	9	19	13	9	12	22	0.0980166	0.920698	0.0980166	terminal bouton
619	396452	ENSGALG00000000209	56	15	39	20	21	17	13	5	10	46	14	27	9	19	13	9	12	22	0.0980166	0.920698	0.0980166	intracellular membrane-bounded organelle
620	396452	ENSGALG00000000209	56	15	39	20	21	17	13	5	10	46	14	27	9	19	13	9	12	22	0.0980166	0.920698	0.0980166	membrane raft
621	769972	ENSGALG00000000215	1285	1384	941	626	763	639	752	925	668	694	742	1216	1309	684	1182	1016	622	658	0.187355	0.942475	0.187355	cytoplasm
622	769972	ENSGALG00000000215	1285	1384	941	626	763	639	752	925	668	694	742	1216	1309	684	1182	1016	622	658	0.187355	0.942475	0.187355	RNA binding
623	769972	ENSGALG00000000215	1285	1384	941	626	763	639	752	925	668	694	742	1216	1309	684	1182	1016	622	658	0.187355	0.942475	0.187355	hydrolase activity
624	769972	ENSGALG00000000215	1285	1384	941	626	763	639	752	925	668	694	742	1216	1309	684	1182	1016	622	658	0.187355	0.942475	0.187355	RNA phosphodiester bond hydrolysis, exonucleolytic
625	769972	ENSGALG00000000215	1285	1384	941	626	763	639	752	925	668	694	742	1216	1309	684	1182	1016	622	658	0.187355	0.942475	0.187355	P-body
626	769972	ENSGALG00000000215	1285	1384	941	626	763	639	752	925	668	694	742	1216	1309	684	1182	1016	622	658	0.187355	0.942475	0.187355	5'-3' exoribonuclease activity
627	769972	ENSGALG00000000215	1285	1384	941	626	763	639	752	925	668	694	742	1216	1309	684	1182	1016	622	658	0.187355	0.942475	0.187355	manganese ion binding
628	769972	ENSGALG00000000215	1285	1384	941	626	763	639	752	925	668	694	742	1216	1309	684	1182	1016	622	658	0.187355	0.942475	0.187355	m7G(5')pppN diphosphatase activity
629	769972	ENSGALG00000000215	1285	1384	941	626	763	639	752	925	668	694	742	1216	1309	684	1182	1016	622	658	0.187355	0.942475	0.187355	mRNA catabolic process
630	769972	ENSGALG00000000215	1285	1384	941	626	763	639	752	925	668	694	742	1216	1309	684	1182	1016	622	658	0.187355	0.942475	0.187355	negative regulation of telomere maintenance via telomerase
631	769972	ENSGALG00000000215	1285	1384	941	626	763	639	752	925	668	694	742	1216	1309	684	1182	1016	622	658	0.187355	0.942475	0.187355	regulation of mRNA stability
632	769972	ENSGALG00000000215	1285	1384	941	626	763	639	752	925	668	694	742	1216	1309	684	1182	1016	622	658	0.187355	0.942475	0.187355	histone mRNA catabolic process
633	769972	ENSGALG00000000215	1285	1384	941	626	763	639	752	925	668	694	742	1216	1309	684	1182	1016	622	658	0.187355	0.942475	0.187355	regulation of telomerase RNA localization to Cajal body
634	769972	ENSGALG00000000215	1285	1384	941	626	763	639	752	925	668	694	742	1216	1309	684	1182	1016	622	658	0.187355	0.942475	0.187355	nucleoplasm
635	769972	ENSGALG00000000215	1285	1384	941	626	763	639	752	925	668	694	742	1216	1309	684	1182	1016	622	658	0.187355	0.942475	0.187355	RISC complex
636	769972	ENSGALG00000000215	1285	1384	941	626	763	639	752	925	668	694	742	1216	1309	684	1182	1016	622	658	0.187355	0.942475	0.187355	cell junction
637	769972	ENSGALG00000000215	1285	1384	941	626	763	639	752	925	668	694	742	1216	1309	684	1182	1016	622	658	0.187355	0.942475	0.187355	cytoplasmic ribonucleoprotein granule
638	769972	ENSGALG00000000215	1285	1384	941	626	763	639	752	925	668	694	742	1216	1309	684	1182	1016	622	658	0.187355	0.942475	0.187355	deadenylation-dependent decapping of nuclear-transcribed mRNA
639	421155	ENSGALG00000000217	3	0	2	0	3	1	5	34	19	5	6	50	22	7	5	9	3	5	0.9624	0.981271	0.9624	presynaptic active zone
640	421155	ENSGALG00000000217	3	0	2	0	3	1	5	34	19	5	6	50	22	7	5	9	3	5	0.9624	0.981271	0.9624	synapse organization
641	421155	ENSGALG00000000217	3	0	2	0	3	1	5	34	19	5	6	50	22	7	5	9	3	5	0.9624	0.981271	0.9624	synapse
642	421155	ENSGALG00000000217	3	0	2	0	3	1	5	34	19	5	6	50	22	7	5	9	3	5	0.9624	0.981271	0.9624	protein binding
643	770061	ENSGALG00000000218	298	495	201	156	190	158	192	355	182	199	231	439	452	177	401	298	133	147	0.367252	0.986616	0.367252	cytoplasm
644	770061	ENSGALG00000000218	298	495	201	156	190	158	192	355	182	199	231	439	452	177	401	298	133	147	0.367252	0.986616	0.367252	SRP-dependent cotranslational protein targeting to membrane
645	770061	ENSGALG00000000218	298	495	201	156	190	158	192	355	182	199	231	439	452	177	401	298	133	147	0.367252	0.986616	0.367252	signal recognition particle
646	770061	ENSGALG00000000218	298	495	201	156	190	158	192	355	182	199	231	439	452	177	401	298	133	147	0.367252	0.986616	0.367252	7S RNA binding
647	770061	ENSGALG00000000218	298	495	201	156	190	158	192	355	182	199	231	439	452	177	401	298	133	147	0.367252	0.986616	0.367252	signal recognition particle, endoplasmic reticulum targeting
648	770061	ENSGALG00000000218	298	495	201	156	190	158	192	355	182	199	231	439	452	177	401	298	133	147	0.367252	0.986616	0.367252	ribosome binding
649	770061	ENSGALG00000000218	298	495	201	156	190	158	192	355	182	199	231	439	452	177	401	298	133	147	0.367252	0.986616	0.367252	SRP-dependent cotranslational protein targeting to membrane, signal sequence recognition
650	770061	ENSGALG00000000218	298	495	201	156	190	158	192	355	182	199	231	439	452	177	401	298	133	147	0.367252	0.986616	0.367252	response to drug
651	770061	ENSGALG00000000218	298	495	201	156	190	158	192	355	182	199	231	439	452	177	401	298	133	147	0.367252	0.986616	0.367252	nucleolus
652	415607	ENSGALG00000000220	11	7	20	6	4	5	6	19	12	4	8	28	7	6	7	9	4	7	0.62734	0.91588	0.62734	cytoplasm
653	415607	ENSGALG00000000220	11	7	20	6	4	5	6	19	12	4	8	28	7	6	7	9	4	7	0.62734	0.91588	0.62734	positive regulation of apoptotic process
654	415607	ENSGALG00000000220	11	7	20	6	4	5	6	19	12	4	8	28	7	6	7	9	4	7	0.62734	0.91588	0.62734	nucleus
655	415607	ENSGALG00000000220	11	7	20	6	4	5	6	19	12	4	8	28	7	6	7	9	4	7	0.62734	0.91588	0.62734	microtubule binding
656	415607	ENSGALG00000000220	11	7	20	6	4	5	6	19	12	4	8	28	7	6	7	9	4	7	0.62734	0.91588	0.62734	Wnt signaling pathway
657	415607	ENSGALG00000000220	11	7	20	6	4	5	6	19	12	4	8	28	7	6	7	9	4	7	0.62734	0.91588	0.62734	cell migration
658	415607	ENSGALG00000000220	11	7	20	6	4	5	6	19	12	4	8	28	7	6	7	9	4	7	0.62734	0.91588	0.62734	negative regulation of cell population proliferation
659	415607	ENSGALG00000000220	11	7	20	6	4	5	6	19	12	4	8	28	7	6	7	9	4	7	0.62734	0.91588	0.62734	beta-catenin binding
660	415607	ENSGALG00000000220	11	7	20	6	4	5	6	19	12	4	8	28	7	6	7	9	4	7	0.62734	0.91588	0.62734	positive regulation of protein catabolic process
661	415607	ENSGALG00000000220	11	7	20	6	4	5	6	19	12	4	8	28	7	6	7	9	4	7	0.62734	0.91588	0.62734	cell fate specification
662	415607	ENSGALG00000000220	11	7	20	6	4	5	6	19	12	4	8	28	7	6	7	9	4	7	0.62734	0.91588	0.62734	cellular response to DNA damage stimulus
663	415607	ENSGALG00000000220	11	7	20	6	4	5	6	19	12	4	8	28	7	6	7	9	4	7	0.62734	0.91588	0.62734	cytoplasmic microtubule
664	415607	ENSGALG00000000220	11	7	20	6	4	5	6	19	12	4	8	28	7	6	7	9	4	7	0.62734	0.91588	0.62734	negative regulation of canonical Wnt signaling pathway
665	415607	ENSGALG00000000220	11	7	20	6	4	5	6	19	12	4	8	28	7	6	7	9	4	7	0.62734	0.91588	0.62734	regulation of cell differentiation
666	415607	ENSGALG00000000220	11	7	20	6	4	5	6	19	12	4	8	28	7	6	7	9	4	7	0.62734	0.91588	0.62734	mitotic cytokinesis
667	415607	ENSGALG00000000220	11	7	20	6	4	5	6	19	12	4	8	28	7	6	7	9	4	7	0.62734	0.91588	0.62734	gamma-catenin binding
668	415607	ENSGALG00000000220	11	7	20	6	4	5	6	19	12	4	8	28	7	6	7	9	4	7	0.62734	0.91588	0.62734	negative regulation of microtubule depolymerization
669	415607	ENSGALG00000000220	11	7	20	6	4	5	6	19	12	4	8	28	7	6	7	9	4	7	0.62734	0.91588	0.62734	cell cycle arrest
670	415607	ENSGALG00000000220	11	7	20	6	4	5	6	19	12	4	8	28	7	6	7	9	4	7	0.62734	0.91588	0.62734	pattern specification process
671	415607	ENSGALG00000000220	11	7	20	6	4	5	6	19	12	4	8	28	7	6	7	9	4	7	0.62734	0.91588	0.62734	negative regulation of Wnt signaling pathway
672	415607	ENSGALG00000000220	11	7	20	6	4	5	6	19	12	4	8	28	7	6	7	9	4	7	0.62734	0.91588	0.62734	beta-catenin destruction complex
673	415607	ENSGALG00000000220	11	7	20	6	4	5	6	19	12	4	8	28	7	6	7	9	4	7	0.62734	0.91588	0.62734	protein binding
674	415607	ENSGALG00000000220	11	7	20	6	4	5	6	19	12	4	8	28	7	6	7	9	4	7	0.62734	0.91588	0.62734	protein kinase regulator activity
675	415607	ENSGALG00000000220	11	7	20	6	4	5	6	19	12	4	8	28	7	6	7	9	4	7	0.62734	0.91588	0.62734	protein kinase binding
676	415607	ENSGALG00000000220	11	7	20	6	4	5	6	19	12	4	8	28	7	6	7	9	4	7	0.62734	0.91588	0.62734	ubiquitin protein ligase binding
677	415607	ENSGALG00000000220	11	7	20	6	4	5	6	19	12	4	8	28	7	6	7	9	4	7	0.62734	0.91588	0.62734	microtubule plus-end binding
678	415607	ENSGALG00000000220	11	7	20	6	4	5	6	19	12	4	8	28	7	6	7	9	4	7	0.62734	0.91588	0.62734	dynein complex binding
679	415607	ENSGALG00000000220	11	7	20	6	4	5	6	19	12	4	8	28	7	6	7	9	4	7	0.62734	0.91588	0.62734	mitotic spindle assembly checkpoint
680	415607	ENSGALG00000000220	11	7	20	6	4	5	6	19	12	4	8	28	7	6	7	9	4	7	0.62734	0.91588	0.62734	insulin receptor signaling pathway
681	415607	ENSGALG00000000220	11	7	20	6	4	5	6	19	12	4	8	28	7	6	7	9	4	7	0.62734	0.91588	0.62734	positive regulation of cell death
682	415607	ENSGALG00000000220	11	7	20	6	4	5	6	19	12	4	8	28	7	6	7	9	4	7	0.62734	0.91588	0.62734	positive regulation of cell migration
683	415607	ENSGALG00000000220	11	7	20	6	4	5	6	19	12	4	8	28	7	6	7	9	4	7	0.62734	0.91588	0.62734	positive regulation of pseudopodium assembly
684	415607	ENSGALG00000000220	11	7	20	6	4	5	6	19	12	4	8	28	7	6	7	9	4	7	0.62734	0.91588	0.62734	regulation of microtubule-based process
685	415607	ENSGALG00000000220	11	7	20	6	4	5	6	19	12	4	8	28	7	6	7	9	4	7	0.62734	0.91588	0.62734	negative regulation of cyclin-dependent protein serine/threonine kinase activity
686	415607	ENSGALG00000000220	11	7	20	6	4	5	6	19	12	4	8	28	7	6	7	9	4	7	0.62734	0.91588	0.62734	regulation of attachment of spindle microtubules to kinetochore
687	415607	ENSGALG00000000220	11	7	20	6	4	5	6	19	12	4	8	28	7	6	7	9	4	7	0.62734	0.91588	0.62734	protein-containing complex assembly
688	415607	ENSGALG00000000220	11	7	20	6	4	5	6	19	12	4	8	28	7	6	7	9	4	7	0.62734	0.91588	0.62734	positive regulation of protein localization to centrosome
689	415607	ENSGALG00000000220	11	7	20	6	4	5	6	19	12	4	8	28	7	6	7	9	4	7	0.62734	0.91588	0.62734	kinetochore
690	415607	ENSGALG00000000220	11	7	20	6	4	5	6	19	12	4	8	28	7	6	7	9	4	7	0.62734	0.91588	0.62734	centrosome
691	415607	ENSGALG00000000220	11	7	20	6	4	5	6	19	12	4	8	28	7	6	7	9	4	7	0.62734	0.91588	0.62734	microtubule
692	415607	ENSGALG00000000220	11	7	20	6	4	5	6	19	12	4	8	28	7	6	7	9	4	7	0.62734	0.91588	0.62734	plasma membrane
693	415607	ENSGALG00000000220	11	7	20	6	4	5	6	19	12	4	8	28	7	6	7	9	4	7	0.62734	0.91588	0.62734	adherens junction
694	415607	ENSGALG00000000220	11	7	20	6	4	5	6	19	12	4	8	28	7	6	7	9	4	7	0.62734	0.91588	0.62734	bicellular tight junction
695	415607	ENSGALG00000000220	11	7	20	6	4	5	6	19	12	4	8	28	7	6	7	9	4	7	0.62734	0.91588	0.62734	lateral plasma membrane
696	415607	ENSGALG00000000220	11	7	20	6	4	5	6	19	12	4	8	28	7	6	7	9	4	7	0.62734	0.91588	0.62734	catenin complex
697	415607	ENSGALG00000000220	11	7	20	6	4	5	6	19	12	4	8	28	7	6	7	9	4	7	0.62734	0.91588	0.62734	lamellipodium
698	415607	ENSGALG00000000220	11	7	20	6	4	5	6	19	12	4	8	28	7	6	7	9	4	7	0.62734	0.91588	0.62734	ruffle membrane
699	415607	ENSGALG00000000220	11	7	20	6	4	5	6	19	12	4	8	28	7	6	7	9	4	7	0.62734	0.91588	0.62734	perinuclear region of cytoplasm
700	421156	ENSGALG00000000223	8611	9355	7875	9978	9231	10126	16859	10963	12910	10269	13421	12601	12514	12698	10587	9075	12191	11253	0.553847	0.880606	0.553847	membrane
701	421156	ENSGALG00000000223	8611	9355	7875	9978	9231	10126	16859	10963	12910	10269	13421	12601	12514	12698	10587	9075	12191	11253	0.553847	0.880606	0.553847	integral component of membrane
702	421156	ENSGALG00000000223	8611	9355	7875	9978	9231	10126	16859	10963	12910	10269	13421	12601	12514	12698	10587	9075	12191	11253	0.553847	0.880606	0.553847	protein binding
703	421157	ENSGALG00000000226	181	179	200	88	120	177	399	205	257	248	266	342	371	416	250	480	274	463	0.675162	0.801747	0.675162	membrane
704	421157	ENSGALG00000000226	181	179	200	88	120	177	399	205	257	248	266	342	371	416	250	480	274	463	0.675162	0.801747	0.675162	integral component of membrane
705	421157	ENSGALG00000000226	181	179	200	88	120	177	399	205	257	248	266	342	371	416	250	480	274	463	0.675162	0.801747	0.675162	positive regulation of canonical Wnt signaling pathway
706	395155	ENSGALG00000000227	70	112	109	163	84	105	197	109	77	98	66	71	43	57	103	41	71	109	0.511472	0.986616	0.511472	regulation of axon extension
707	395155	ENSGALG00000000227	70	112	109	163	84	105	197	109	77	98	66	71	43	57	103	41	71	109	0.511472	0.986616	0.511472	brain development
708	395155	ENSGALG00000000227	70	112	109	163	84	105	197	109	77	98	66	71	43	57	103	41	71	109	0.511472	0.986616	0.511472	regulation of neuron differentiation
709	395155	ENSGALG00000000227	70	112	109	163	84	105	197	109	77	98	66	71	43	57	103	41	71	109	0.511472	0.986616	0.511472	cytoplasm
710	395155	ENSGALG00000000227	70	112	109	163	84	105	197	109	77	98	66	71	43	57	103	41	71	109	0.511472	0.986616	0.511472	multicellular organism development
711	395155	ENSGALG00000000227	70	112	109	163	84	105	197	109	77	98	66	71	43	57	103	41	71	109	0.511472	0.986616	0.511472	axon guidance
712	395155	ENSGALG00000000227	70	112	109	163	84	105	197	109	77	98	66	71	43	57	103	41	71	109	0.511472	0.986616	0.511472	hydrolase activity
713	395155	ENSGALG00000000227	70	112	109	163	84	105	197	109	77	98	66	71	43	57	103	41	71	109	0.511472	0.986616	0.511472	microtubule binding
714	395155	ENSGALG00000000227	70	112	109	163	84	105	197	109	77	98	66	71	43	57	103	41	71	109	0.511472	0.986616	0.511472	cell differentiation
715	395155	ENSGALG00000000227	70	112	109	163	84	105	197	109	77	98	66	71	43	57	103	41	71	109	0.511472	0.986616	0.511472	nervous system development
716	395155	ENSGALG00000000227	70	112	109	163	84	105	197	109	77	98	66	71	43	57	103	41	71	109	0.511472	0.986616	0.511472	cytoskeleton organization
717	395155	ENSGALG00000000227	70	112	109	163	84	105	197	109	77	98	66	71	43	57	103	41	71	109	0.511472	0.986616	0.511472	hydrolase activity, acting on carbon-nitrogen (but not peptide) bonds
718	395155	ENSGALG00000000227	70	112	109	163	84	105	197	109	77	98	66	71	43	57	103	41	71	109	0.511472	0.986616	0.511472	protein kinase binding
719	395155	ENSGALG00000000227	70	112	109	163	84	105	197	109	77	98	66	71	43	57	103	41	71	109	0.511472	0.986616	0.511472	regulation of neuron projection development
720	395155	ENSGALG00000000227	70	112	109	163	84	105	197	109	77	98	66	71	43	57	103	41	71	109	0.511472	0.986616	0.511472	cytosol
721	395155	ENSGALG00000000227	70	112	109	163	84	105	197	109	77	98	66	71	43	57	103	41	71	109	0.511472	0.986616	0.511472	plasma membrane
722	395155	ENSGALG00000000227	70	112	109	163	84	105	197	109	77	98	66	71	43	57	103	41	71	109	0.511472	0.986616	0.511472	axon
723	395155	ENSGALG00000000227	70	112	109	163	84	105	197	109	77	98	66	71	43	57	103	41	71	109	0.511472	0.986616	0.511472	dendrite
724	395155	ENSGALG00000000227	70	112	109	163	84	105	197	109	77	98	66	71	43	57	103	41	71	109	0.511472	0.986616	0.511472	neuronal cell body
725	425673	ENSGALG00000000233	1484	1142	1003	1172	1140	1675	1726	1273	1337	1406	1100	1137	1995	1223	1356	1851	1699	1590	0.647732	0.993388	0.647732	nucleus
726	425673	ENSGALG00000000233	1484	1142	1003	1172	1140	1675	1726	1273	1337	1406	1100	1137	1995	1223	1356	1851	1699	1590	0.647732	0.993388	0.647732	positive regulation of transcription by RNA polymerase II
727	425673	ENSGALG00000000233	1484	1142	1003	1172	1140	1675	1726	1273	1337	1406	1100	1137	1995	1223	1356	1851	1699	1590	0.647732	0.993388	0.647732	DNA-binding transcription factor activity, RNA polymerase II-specific
728	425673	ENSGALG00000000233	1484	1142	1003	1172	1140	1675	1726	1273	1337	1406	1100	1137	1995	1223	1356	1851	1699	1590	0.647732	0.993388	0.647732	transcription regulatory region sequence-specific DNA binding
729	425673	ENSGALG00000000233	1484	1142	1003	1172	1140	1675	1726	1273	1337	1406	1100	1137	1995	1223	1356	1851	1699	1590	0.647732	0.993388	0.647732	RNA polymerase II cis-regulatory region sequence-specific DNA binding
730	425673	ENSGALG00000000233	1484	1142	1003	1172	1140	1675	1726	1273	1337	1406	1100	1137	1995	1223	1356	1851	1699	1590	0.647732	0.993388	0.647732	DNA-binding transcription repressor activity, RNA polymerase II-specific
731	425673	ENSGALG00000000233	1484	1142	1003	1172	1140	1675	1726	1273	1337	1406	1100	1137	1995	1223	1356	1851	1699	1590	0.647732	0.993388	0.647732	histone deacetylase binding
732	425673	ENSGALG00000000233	1484	1142	1003	1172	1140	1675	1726	1273	1337	1406	1100	1137	1995	1223	1356	1851	1699	1590	0.647732	0.993388	0.647732	negative regulation of transcription by RNA polymerase II
733	425673	ENSGALG00000000233	1484	1142	1003	1172	1140	1675	1726	1273	1337	1406	1100	1137	1995	1223	1356	1851	1699	1590	0.647732	0.993388	0.647732	multicellular organism growth
734	425673	ENSGALG00000000233	1484	1142	1003	1172	1140	1675	1726	1273	1337	1406	1100	1137	1995	1223	1356	1851	1699	1590	0.647732	0.993388	0.647732	nucleoplasm
735	425673	ENSGALG00000000233	1484	1142	1003	1172	1140	1675	1726	1273	1337	1406	1100	1137	1995	1223	1356	1851	1699	1590	0.647732	0.993388	0.647732	nucleic acid binding
736	425673	ENSGALG00000000233	1484	1142	1003	1172	1140	1675	1726	1273	1337	1406	1100	1137	1995	1223	1356	1851	1699	1590	0.647732	0.993388	0.647732	sequence-specific double-stranded DNA binding
737	415608	ENSGALG00000000234	0	1	0	0	0	0	1	0	0	0	2	3	4	2	10	5	1	0	NA	NA	NA	membrane
738	415608	ENSGALG00000000234	0	1	0	0	0	0	1	0	0	0	2	3	4	2	10	5	1	0	NA	NA	NA	cytoskeleton
739	415608	ENSGALG00000000234	0	1	0	0	0	0	1	0	0	0	2	3	4	2	10	5	1	0	NA	NA	NA	actomyosin structure organization
740	419523	ENSGALG00000000235	473	674	627	712	857	574	624	450	499	476	531	441	502	417	453	342	462	461	0.589313	0.879045	0.589313	protein phosphatase regulator activity
741	419523	ENSGALG00000000235	473	674	627	712	857	574	624	450	499	476	531	441	502	417	453	342	462	461	0.589313	0.879045	0.589313	regulation of phosphoprotein phosphatase activity
742	419523	ENSGALG00000000235	473	674	627	712	857	574	624	450	499	476	531	441	502	417	453	342	462	461	0.589313	0.879045	0.589313	protein phosphatase type 2A complex
743	419523	ENSGALG00000000235	473	674	627	712	857	574	624	450	499	476	531	441	502	417	453	342	462	461	0.589313	0.879045	0.589313	protein binding
744	419523	ENSGALG00000000235	473	674	627	712	857	574	624	450	499	476	531	441	502	417	453	342	462	461	0.589313	0.879045	0.589313	cytosol
745	419523	ENSGALG00000000235	473	674	627	712	857	574	624	450	499	476	531	441	502	417	453	342	462	461	0.589313	0.879045	0.589313	peptidyl-serine dephosphorylation
746	419523	ENSGALG00000000235	473	674	627	712	857	574	624	450	499	476	531	441	502	417	453	342	462	461	0.589313	0.879045	0.589313	protein dephosphorylation
747	419523	ENSGALG00000000235	473	674	627	712	857	574	624	450	499	476	531	441	502	417	453	342	462	461	0.589313	0.879045	0.589313	response to morphine
748	419523	ENSGALG00000000235	473	674	627	712	857	574	624	450	499	476	531	441	502	417	453	342	462	461	0.589313	0.879045	0.589313	synapse
749	419523	ENSGALG00000000235	473	674	627	712	857	574	624	450	499	476	531	441	502	417	453	342	462	461	0.589313	0.879045	0.589313	glutamatergic synapse
750	769322	ENSGALG00000000241	7	6	11	0	1	4	31	24	7	2	8	24	43	8	9	14	10	7	0.755351	0.943409	0.755351	cholesterol binding
751	769322	ENSGALG00000000241	7	6	11	0	1	4	31	24	7	2	8	24	43	8	9	14	10	7	0.755351	0.943409	0.755351	lipid binding
752	769322	ENSGALG00000000241	7	6	11	0	1	4	31	24	7	2	8	24	43	8	9	14	10	7	0.755351	0.943409	0.755351	cytosol
753	769322	ENSGALG00000000241	7	6	11	0	1	4	31	24	7	2	8	24	43	8	9	14	10	7	0.755351	0.943409	0.755351	endoplasmic reticulum
754	769322	ENSGALG00000000241	7	6	11	0	1	4	31	24	7	2	8	24	43	8	9	14	10	7	0.755351	0.943409	0.755351	intracellular cholesterol transport
755	769322	ENSGALG00000000241	7	6	11	0	1	4	31	24	7	2	8	24	43	8	9	14	10	7	0.755351	0.943409	0.755351	cholesterol transfer activity
756	769322	ENSGALG00000000241	7	6	11	0	1	4	31	24	7	2	8	24	43	8	9	14	10	7	0.755351	0.943409	0.755351	positive regulation of cholesterol esterification
757	769322	ENSGALG00000000241	7	6	11	0	1	4	31	24	7	2	8	24	43	8	9	14	10	7	0.755351	0.943409	0.755351	cholesterol transport involved in cholesterol storage
758	769322	ENSGALG00000000241	7	6	11	0	1	4	31	24	7	2	8	24	43	8	9	14	10	7	0.755351	0.943409	0.755351	cholesterol import
759	769322	ENSGALG00000000241	7	6	11	0	1	4	31	24	7	2	8	24	43	8	9	14	10	7	0.755351	0.943409	0.755351	positive regulation of bile acid biosynthetic process
760	769322	ENSGALG00000000241	7	6	11	0	1	4	31	24	7	2	8	24	43	8	9	14	10	7	0.755351	0.943409	0.755351	cytoplasm
761	769322	ENSGALG00000000241	7	6	11	0	1	4	31	24	7	2	8	24	43	8	9	14	10	7	0.755351	0.943409	0.755351	cytoplasmic vesicle
762	769322	ENSGALG00000000241	7	6	11	0	1	4	31	24	7	2	8	24	43	8	9	14	10	7	0.755351	0.943409	0.755351	intermembrane lipid transfer
763	395176	ENSGALG00000000242	0	0	0	0	0	0	0	0	0	0	0	0	0	0	0	0	0	0	NA	NA	NA	DNA binding
764	395176	ENSGALG00000000242	0	0	0	0	0	0	0	0	0	0	0	0	0	0	0	0	0	0	NA	NA	NA	metal ion binding
765	395176	ENSGALG00000000242	0	0	0	0	0	0	0	0	0	0	0	0	0	0	0	0	0	0	NA	NA	NA	regulation of transcription, DNA-templated
766	395176	ENSGALG00000000242	0	0	0	0	0	0	0	0	0	0	0	0	0	0	0	0	0	0	NA	NA	NA	multicellular organism development
767	395176	ENSGALG00000000242	0	0	0	0	0	0	0	0	0	0	0	0	0	0	0	0	0	0	NA	NA	NA	nucleus
768	395176	ENSGALG00000000242	0	0	0	0	0	0	0	0	0	0	0	0	0	0	0	0	0	0	NA	NA	NA	DNA-binding transcription activator activity, RNA polymerase II-specific
769	395176	ENSGALG00000000242	0	0	0	0	0	0	0	0	0	0	0	0	0	0	0	0	0	0	NA	NA	NA	DNA-binding transcription factor activity
770	395176	ENSGALG00000000242	0	0	0	0	0	0	0	0	0	0	0	0	0	0	0	0	0	0	NA	NA	NA	positive regulation of transcription by RNA polymerase II
771	395176	ENSGALG00000000242	0	0	0	0	0	0	0	0	0	0	0	0	0	0	0	0	0	0	NA	NA	NA	protein dimerization activity
772	395176	ENSGALG00000000242	0	0	0	0	0	0	0	0	0	0	0	0	0	0	0	0	0	0	NA	NA	NA	RNA polymerase II cis-regulatory region sequence-specific DNA binding
773	395176	ENSGALG00000000242	0	0	0	0	0	0	0	0	0	0	0	0	0	0	0	0	0	0	NA	NA	NA	chromatin binding
774	395176	ENSGALG00000000242	0	0	0	0	0	0	0	0	0	0	0	0	0	0	0	0	0	0	NA	NA	NA	cell fate determination
775	395176	ENSGALG00000000242	0	0	0	0	0	0	0	0	0	0	0	0	0	0	0	0	0	0	NA	NA	NA	positive regulation of chromatin binding
776	395176	ENSGALG00000000242	0	0	0	0	0	0	0	0	0	0	0	0	0	0	0	0	0	0	NA	NA	NA	positive regulation of transcription, DNA-templated
777	395176	ENSGALG00000000242	0	0	0	0	0	0	0	0	0	0	0	0	0	0	0	0	0	0	NA	NA	NA	adipose tissue development
778	395176	ENSGALG00000000242	0	0	0	0	0	0	0	0	0	0	0	0	0	0	0	0	0	0	NA	NA	NA	positive regulation of cold-induced thermogenesis
779	395176	ENSGALG00000000242	0	0	0	0	0	0	0	0	0	0	0	0	0	0	0	0	0	0	NA	NA	NA	brown fat cell differentiation
780	395228	ENSGALG00000000243	4	2	6	0	0	0	1	2	3	0	4	4	0	0	0	0	0	0	NA	NA	NA	nucleus
781	395228	ENSGALG00000000243	4	2	6	0	0	0	1	2	3	0	4	4	0	0	0	0	0	0	NA	NA	NA	nucleic acid binding
782	395228	ENSGALG00000000243	4	2	6	0	0	0	1	2	3	0	4	4	0	0	0	0	0	0	NA	NA	NA	cytoplasm
783	395228	ENSGALG00000000243	4	2	6	0	0	0	1	2	3	0	4	4	0	0	0	0	0	0	NA	NA	NA	RNA binding
784	395228	ENSGALG00000000243	4	2	6	0	0	0	1	2	3	0	4	4	0	0	0	0	0	0	NA	NA	NA	nucleolus
785	395228	ENSGALG00000000243	4	2	6	0	0	0	1	2	3	0	4	4	0	0	0	0	0	0	NA	NA	NA	cytosol
786	723973	ENSGALG00000000244	0	0	0	0	0	0	0	0	0	0	0	0	0	0	0	0	0	0	NA	NA	NA	nucleotide binding
787	723973	ENSGALG00000000244	0	0	0	0	0	0	0	0	0	0	0	0	0	0	0	0	0	0	NA	NA	NA	ATP binding
788	723973	ENSGALG00000000244	0	0	0	0	0	0	0	0	0	0	0	0	0	0	0	0	0	0	NA	NA	NA	protein kinase activity
789	723973	ENSGALG00000000244	0	0	0	0	0	0	0	0	0	0	0	0	0	0	0	0	0	0	NA	NA	NA	protein serine/threonine kinase activity
790	723973	ENSGALG00000000244	0	0	0	0	0	0	0	0	0	0	0	0	0	0	0	0	0	0	NA	NA	NA	protein phosphorylation
791	723973	ENSGALG00000000244	0	0	0	0	0	0	0	0	0	0	0	0	0	0	0	0	0	0	NA	NA	NA	peptidyl-serine phosphorylation
792	723973	ENSGALG00000000244	0	0	0	0	0	0	0	0	0	0	0	0	0	0	0	0	0	0	NA	NA	NA	intracellular signal transduction
793	723973	ENSGALG00000000244	0	0	0	0	0	0	0	0	0	0	0	0	0	0	0	0	0	0	NA	NA	NA	nucleus
794	723973	ENSGALG00000000244	0	0	0	0	0	0	0	0	0	0	0	0	0	0	0	0	0	0	NA	NA	NA	cytoplasm
795	723973	ENSGALG00000000244	0	0	0	0	0	0	0	0	0	0	0	0	0	0	0	0	0	0	NA	NA	NA	calmodulin binding
796	723973	ENSGALG00000000244	0	0	0	0	0	0	0	0	0	0	0	0	0	0	0	0	0	0	NA	NA	NA	calcium-dependent protein serine/threonine kinase activity
797	723973	ENSGALG00000000244	0	0	0	0	0	0	0	0	0	0	0	0	0	0	0	0	0	0	NA	NA	NA	protein autophosphorylation
798	723973	ENSGALG00000000244	0	0	0	0	0	0	0	0	0	0	0	0	0	0	0	0	0	0	NA	NA	NA	calmodulin-dependent protein kinase activity
799	723973	ENSGALG00000000244	0	0	0	0	0	0	0	0	0	0	0	0	0	0	0	0	0	0	NA	NA	NA	long-term memory
800	723973	ENSGALG00000000244	0	0	0	0	0	0	0	0	0	0	0	0	0	0	0	0	0	0	NA	NA	NA	myeloid dendritic cell differentiation
801	723973	ENSGALG00000000244	0	0	0	0	0	0	0	0	0	0	0	0	0	0	0	0	0	0	NA	NA	NA	positive regulation of transcription, DNA-templated
802	723973	ENSGALG00000000244	0	0	0	0	0	0	0	0	0	0	0	0	0	0	0	0	0	0	NA	NA	NA	fibrillar center
803	723973	ENSGALG00000000244	0	0	0	0	0	0	0	0	0	0	0	0	0	0	0	0	0	0	NA	NA	NA	nucleoplasm
804	415609	ENSGALG00000000247	43	66	36	21	15	48	23	65	40	33	25	59	56	26	68	57	37	16	0.813687	0.975777	0.813687	rRNA processing
805	415609	ENSGALG00000000247	43	66	36	21	15	48	23	65	40	33	25	59	56	26	68	57	37	16	0.813687	0.975777	0.813687	small-subunit processome
806	415609	ENSGALG00000000247	43	66	36	21	15	48	23	65	40	33	25	59	56	26	68	57	37	16	0.813687	0.975777	0.813687	Pwp2p-containing subcomplex of 90S preribosome
807	415609	ENSGALG00000000247	43	66	36	21	15	48	23	65	40	33	25	59	56	26	68	57	37	16	0.813687	0.975777	0.813687	retina homeostasis
808	415609	ENSGALG00000000247	43	66	36	21	15	48	23	65	40	33	25	59	56	26	68	57	37	16	0.813687	0.975777	0.813687	regulation of axon extension
809	415609	ENSGALG00000000247	43	66	36	21	15	48	23	65	40	33	25	59	56	26	68	57	37	16	0.813687	0.975777	0.813687	nucleolus
810	415609	ENSGALG00000000247	43	66	36	21	15	48	23	65	40	33	25	59	56	26	68	57	37	16	0.813687	0.975777	0.813687	protein binding
811	378781	ENSGALG00000000249	0	0	1	0	0	0	0	0	0	0	0	0	0	0	0	0	0	0	NA	NA	NA	extracellular space
812	378781	ENSGALG00000000249	0	0	1	0	0	0	0	0	0	0	0	0	0	0	0	0	0	0	NA	NA	NA	metal ion binding
813	378781	ENSGALG00000000249	0	0	1	0	0	0	0	0	0	0	0	0	0	0	0	0	0	0	NA	NA	NA	hormone activity
814	378781	ENSGALG00000000249	0	0	1	0	0	0	0	0	0	0	0	0	0	0	0	0	0	0	NA	NA	NA	extracellular region
815	378781	ENSGALG00000000249	0	0	1	0	0	0	0	0	0	0	0	0	0	0	0	0	0	0	NA	NA	NA	growth factor activity
816	378781	ENSGALG00000000249	0	0	1	0	0	0	0	0	0	0	0	0	0	0	0	0	0	0	NA	NA	NA	apoptotic process
817	378781	ENSGALG00000000249	0	0	1	0	0	0	0	0	0	0	0	0	0	0	0	0	0	0	NA	NA	NA	positive regulation of receptor signaling pathway via JAK-STAT
818	378781	ENSGALG00000000249	0	0	1	0	0	0	0	0	0	0	0	0	0	0	0	0	0	0	NA	NA	NA	growth hormone receptor signaling pathway
819	378781	ENSGALG00000000249	0	0	1	0	0	0	0	0	0	0	0	0	0	0	0	0	0	0	NA	NA	NA	negative regulation of apoptotic process
820	378781	ENSGALG00000000249	0	0	1	0	0	0	0	0	0	0	0	0	0	0	0	0	0	0	NA	NA	NA	protein binding
821	378781	ENSGALG00000000249	0	0	1	0	0	0	0	0	0	0	0	0	0	0	0	0	0	0	NA	NA	NA	positive regulation of gene expression
822	378781	ENSGALG00000000249	0	0	1	0	0	0	0	0	0	0	0	0	0	0	0	0	0	0	NA	NA	NA	negative regulation of gene expression
823	378781	ENSGALG00000000249	0	0	1	0	0	0	0	0	0	0	0	0	0	0	0	0	0	0	NA	NA	NA	response to nutrient levels
824	378781	ENSGALG00000000249	0	0	1	0	0	0	0	0	0	0	0	0	0	0	0	0	0	0	NA	NA	NA	animal organ development
825	378781	ENSGALG00000000249	0	0	1	0	0	0	0	0	0	0	0	0	0	0	0	0	0	0	NA	NA	NA	positive regulation of tyrosine phosphorylation of STAT protein
826	378781	ENSGALG00000000249	0	0	1	0	0	0	0	0	0	0	0	0	0	0	0	0	0	0	NA	NA	NA	growth hormone receptor binding
827	378781	ENSGALG00000000249	0	0	1	0	0	0	0	0	0	0	0	0	0	0	0	0	0	0	NA	NA	NA	cysteine-type endopeptidase activity involved in apoptotic process
828	378781	ENSGALG00000000249	0	0	1	0	0	0	0	0	0	0	0	0	0	0	0	0	0	0	NA	NA	NA	response to food
829	378781	ENSGALG00000000249	0	0	1	0	0	0	0	0	0	0	0	0	0	0	0	0	0	0	NA	NA	NA	cellular response to insulin stimulus
830	378781	ENSGALG00000000249	0	0	1	0	0	0	0	0	0	0	0	0	0	0	0	0	0	0	NA	NA	NA	oviduct epithelium development
831	378781	ENSGALG00000000249	0	0	1	0	0	0	0	0	0	0	0	0	0	0	0	0	0	0	NA	NA	NA	positive regulation of multicellular organism growth
832	378781	ENSGALG00000000249	0	0	1	0	0	0	0	0	0	0	0	0	0	0	0	0	0	0	NA	NA	NA	positive regulation of growth
833	378781	ENSGALG00000000249	0	0	1	0	0	0	0	0	0	0	0	0	0	0	0	0	0	0	NA	NA	NA	regulation of defense response to virus by host
834	378781	ENSGALG00000000249	0	0	1	0	0	0	0	0	0	0	0	0	0	0	0	0	0	0	NA	NA	NA	nucleus
835	378781	ENSGALG00000000249	0	0	1	0	0	0	0	0	0	0	0	0	0	0	0	0	0	0	NA	NA	NA	trans-Golgi network
836	378781	ENSGALG00000000249	0	0	1	0	0	0	0	0	0	0	0	0	0	0	0	0	0	0	NA	NA	NA	plasma membrane
837	378781	ENSGALG00000000249	0	0	1	0	0	0	0	0	0	0	0	0	0	0	0	0	0	0	NA	NA	NA	secretory granule
838	419940	ENSGALG00000000251	28	2	36	6	2	1	0	1	1	0	3	25	2	1	1	2	0	0	0.0836688	0.956479	0.0836688	membrane
839	419940	ENSGALG00000000251	28	2	36	6	2	1	0	1	1	0	3	25	2	1	1	2	0	0	0.0836688	0.956479	0.0836688	integral component of membrane
840	419940	ENSGALG00000000251	28	2	36	6	2	1	0	1	1	0	3	25	2	1	1	2	0	0	0.0836688	0.956479	0.0836688	plasma membrane
841	419940	ENSGALG00000000251	28	2	36	6	2	1	0	1	1	0	3	25	2	1	1	2	0	0	0.0836688	0.956479	0.0836688	external side of plasma membrane
842	419940	ENSGALG00000000251	28	2	36	6	2	1	0	1	1	0	3	25	2	1	1	2	0	0	0.0836688	0.956479	0.0836688	transmembrane signaling receptor activity
843	419940	ENSGALG00000000251	28	2	36	6	2	1	0	1	1	0	3	25	2	1	1	2	0	0	0.0836688	0.956479	0.0836688	cell surface receptor signaling pathway
844	419940	ENSGALG00000000251	28	2	36	6	2	1	0	1	1	0	3	25	2	1	1	2	0	0	0.0836688	0.956479	0.0836688	adaptive immune response
845	419940	ENSGALG00000000251	28	2	36	6	2	1	0	1	1	0	3	25	2	1	1	2	0	0	0.0836688	0.956479	0.0836688	B cell receptor signaling pathway
846	419940	ENSGALG00000000251	28	2	36	6	2	1	0	1	1	0	3	25	2	1	1	2	0	0	0.0836688	0.956479	0.0836688	B cell differentiation
847	419940	ENSGALG00000000251	28	2	36	6	2	1	0	1	1	0	3	25	2	1	1	2	0	0	0.0836688	0.956479	0.0836688	identical protein binding
848	419940	ENSGALG00000000251	28	2	36	6	2	1	0	1	1	0	3	25	2	1	1	2	0	0	0.0836688	0.956479	0.0836688	response to bacterium
849	419940	ENSGALG00000000251	28	2	36	6	2	1	0	1	1	0	3	25	2	1	1	2	0	0	0.0836688	0.956479	0.0836688	B cell receptor complex
850	415610	ENSGALG00000000253	321	364	224	257	211	195	325	482	364	203	258	419	599	293	431	409	273	226	0.990597	0.986616	0.990597	membrane
851	415610	ENSGALG00000000253	321	364	224	257	211	195	325	482	364	203	258	419	599	293	431	409	273	226	0.990597	0.986616	0.990597	integral component of membrane
852	415610	ENSGALG00000000253	321	364	224	257	211	195	325	482	364	203	258	419	599	293	431	409	273	226	0.990597	0.986616	0.990597	mitochondrion
853	415610	ENSGALG00000000253	321	364	224	257	211	195	325	482	364	203	258	419	599	293	431	409	273	226	0.990597	0.986616	0.990597	mitochondrial outer membrane
854	415610	ENSGALG00000000253	321	364	224	257	211	195	325	482	364	203	258	419	599	293	431	409	273	226	0.990597	0.986616	0.990597	mitochondrion organization
855	415610	ENSGALG00000000253	321	364	224	257	211	195	325	482	364	203	258	419	599	293	431	409	273	226	0.990597	0.986616	0.990597	synapse assembly
856	415610	ENSGALG00000000253	321	364	224	257	211	195	325	482	364	203	258	419	599	293	431	409	273	226	0.990597	0.986616	0.990597	dendrite development
857	415610	ENSGALG00000000253	321	364	224	257	211	195	325	482	364	203	258	419	599	293	431	409	273	226	0.990597	0.986616	0.990597	mitochondrial membrane fission
858	415610	ENSGALG00000000253	321	364	224	257	211	195	325	482	364	203	258	419	599	293	431	409	273	226	0.990597	0.986616	0.990597	autophagy of mitochondrion
859	415610	ENSGALG00000000253	321	364	224	257	211	195	325	482	364	203	258	419	599	293	431	409	273	226	0.990597	0.986616	0.990597	mitochondrial transport
860	415610	ENSGALG00000000253	321	364	224	257	211	195	325	482	364	203	258	419	599	293	431	409	273	226	0.990597	0.986616	0.990597	optic nerve development
861	415610	ENSGALG00000000253	321	364	224	257	211	195	325	482	364	203	258	419	599	293	431	409	273	226	0.990597	0.986616	0.990597	cerebellar Purkinje cell differentiation
862	415610	ENSGALG00000000253	321	364	224	257	211	195	325	482	364	203	258	419	599	293	431	409	273	226	0.990597	0.986616	0.990597	myelination in peripheral nervous system
863	415610	ENSGALG00000000253	321	364	224	257	211	195	325	482	364	203	258	419	599	293	431	409	273	226	0.990597	0.986616	0.990597	locomotion involved in locomotory behavior
864	415610	ENSGALG00000000253	321	364	224	257	211	195	325	482	364	203	258	419	599	293	431	409	273	226	0.990597	0.986616	0.990597	peripheral nervous system neuron axonogenesis
865	415611	ENSGALG00000000255	737	1004	582	485	615	469	497	719	494	500	532	740	766	452	665	722	448	429	0.538369	0.956479	0.538369	membrane
866	415611	ENSGALG00000000255	737	1004	582	485	615	469	497	719	494	500	532	740	766	452	665	722	448	429	0.538369	0.956479	0.538369	integral component of membrane
867	415611	ENSGALG00000000255	737	1004	582	485	615	469	497	719	494	500	532	740	766	452	665	722	448	429	0.538369	0.956479	0.538369	metal ion binding
868	415611	ENSGALG00000000255	737	1004	582	485	615	469	497	719	494	500	532	740	766	452	665	722	448	429	0.538369	0.956479	0.538369	catalytic activity
869	415611	ENSGALG00000000255	737	1004	582	485	615	469	497	719	494	500	532	740	766	452	665	722	448	429	0.538369	0.956479	0.538369	hydrolase activity
870	415611	ENSGALG00000000255	737	1004	582	485	615	469	497	719	494	500	532	740	766	452	665	722	448	429	0.538369	0.956479	0.538369	Golgi membrane
871	415611	ENSGALG00000000255	737	1004	582	485	615	469	497	719	494	500	532	740	766	452	665	722	448	429	0.538369	0.956479	0.538369	metabolic process
872	415611	ENSGALG00000000255	737	1004	582	485	615	469	497	719	494	500	532	740	766	452	665	722	448	429	0.538369	0.956479	0.538369	carbohydrate binding
873	415611	ENSGALG00000000255	737	1004	582	485	615	469	497	719	494	500	532	740	766	452	665	722	448	429	0.538369	0.956479	0.538369	carbohydrate metabolic process
874	415611	ENSGALG00000000255	737	1004	582	485	615	469	497	719	494	500	532	740	766	452	665	722	448	429	0.538369	0.956479	0.538369	hydrolase activity, acting on glycosyl bonds
875	415611	ENSGALG00000000255	737	1004	582	485	615	469	497	719	494	500	532	740	766	452	665	722	448	429	0.538369	0.956479	0.538369	N-glycan processing
876	415611	ENSGALG00000000255	737	1004	582	485	615	469	497	719	494	500	532	740	766	452	665	722	448	429	0.538369	0.956479	0.538369	alpha-mannosidase activity
877	415611	ENSGALG00000000255	737	1004	582	485	615	469	497	719	494	500	532	740	766	452	665	722	448	429	0.538369	0.956479	0.538369	mannose metabolic process
878	415611	ENSGALG00000000255	737	1004	582	485	615	469	497	719	494	500	532	740	766	452	665	722	448	429	0.538369	0.956479	0.538369	protein deglycosylation
879	415611	ENSGALG00000000255	737	1004	582	485	615	469	497	719	494	500	532	740	766	452	665	722	448	429	0.538369	0.956479	0.538369	mannosidase activity
880	415611	ENSGALG00000000255	737	1004	582	485	615	469	497	719	494	500	532	740	766	452	665	722	448	429	0.538369	0.956479	0.538369	hydrolase activity, hydrolyzing N-glycosyl compounds
881	415611	ENSGALG00000000255	737	1004	582	485	615	469	497	719	494	500	532	740	766	452	665	722	448	429	0.538369	0.956479	0.538369	liver development
882	415611	ENSGALG00000000255	737	1004	582	485	615	469	497	719	494	500	532	740	766	452	665	722	448	429	0.538369	0.956479	0.538369	mitochondrion organization
883	415611	ENSGALG00000000255	737	1004	582	485	615	469	497	719	494	500	532	740	766	452	665	722	448	429	0.538369	0.956479	0.538369	vacuole organization
884	415611	ENSGALG00000000255	737	1004	582	485	615	469	497	719	494	500	532	740	766	452	665	722	448	429	0.538369	0.956479	0.538369	respiratory gaseous exchange by respiratory system
885	415611	ENSGALG00000000255	737	1004	582	485	615	469	497	719	494	500	532	740	766	452	665	722	448	429	0.538369	0.956479	0.538369	lung alveolus development
886	415611	ENSGALG00000000255	737	1004	582	485	615	469	497	719	494	500	532	740	766	452	665	722	448	429	0.538369	0.956479	0.538369	positive regulation of neurogenesis
887	415611	ENSGALG00000000255	737	1004	582	485	615	469	497	719	494	500	532	740	766	452	665	722	448	429	0.538369	0.956479	0.538369	retina morphogenesis in camera-type eye
888	415611	ENSGALG00000000255	737	1004	582	485	615	469	497	719	494	500	532	740	766	452	665	722	448	429	0.538369	0.956479	0.538369	extracellular space
889	415611	ENSGALG00000000255	737	1004	582	485	615	469	497	719	494	500	532	740	766	452	665	722	448	429	0.538369	0.956479	0.538369	Golgi apparatus
890	415611	ENSGALG00000000255	737	1004	582	485	615	469	497	719	494	500	532	740	766	452	665	722	448	429	0.538369	0.956479	0.538369	Golgi medial cisterna
891	415611	ENSGALG00000000255	737	1004	582	485	615	469	497	719	494	500	532	740	766	452	665	722	448	429	0.538369	0.956479	0.538369	cis-Golgi network
892	415611	ENSGALG00000000255	737	1004	582	485	615	469	497	719	494	500	532	740	766	452	665	722	448	429	0.538369	0.956479	0.538369	in utero embryonic development
893	430115	ENSGALG00000000259	2453	2381	2173	2871	2136	2523	3153	2225	2604	2595	2637	2537	3346	2307	2688	2827	2804	2489	0.851342	0.957632	0.851342	cytoplasm
894	430115	ENSGALG00000000259	2453	2381	2173	2871	2136	2523	3153	2225	2604	2595	2637	2537	3346	2307	2688	2827	2804	2489	0.851342	0.957632	0.851342	ubiquitin-dependent protein catabolic process
895	430115	ENSGALG00000000259	2453	2381	2173	2871	2136	2523	3153	2225	2604	2595	2637	2537	3346	2307	2688	2827	2804	2489	0.851342	0.957632	0.851342	endoplasmic reticulum
896	430115	ENSGALG00000000259	2453	2381	2173	2871	2136	2523	3153	2225	2604	2595	2637	2537	3346	2307	2688	2827	2804	2489	0.851342	0.957632	0.851342	protein homodimerization activity
897	430115	ENSGALG00000000259	2453	2381	2173	2871	2136	2523	3153	2225	2604	2595	2637	2537	3346	2307	2688	2827	2804	2489	0.851342	0.957632	0.851342	protein heterodimerization activity
898	430115	ENSGALG00000000259	2453	2381	2173	2871	2136	2523	3153	2225	2604	2595	2637	2537	3346	2307	2688	2827	2804	2489	0.851342	0.957632	0.851342	proteasome binding
899	430115	ENSGALG00000000259	2453	2381	2173	2871	2136	2523	3153	2225	2604	2595	2637	2537	3346	2307	2688	2827	2804	2489	0.851342	0.957632	0.851342	negative regulation of proteasomal protein catabolic process
900	430115	ENSGALG00000000259	2453	2381	2173	2871	2136	2523	3153	2225	2604	2595	2637	2537	3346	2307	2688	2827	2804	2489	0.851342	0.957632	0.851342	cytosol
901	430115	ENSGALG00000000259	2453	2381	2173	2871	2136	2523	3153	2225	2604	2595	2637	2537	3346	2307	2688	2827	2804	2489	0.851342	0.957632	0.851342	perinuclear region of cytoplasm
902	415612	ENSGALG00000000264	1018	1232	797	900	856	743	1502	1384	1028	951	1044	1519	1969	1000	1362	1176	862	872	0.943886	0.956479	0.943886	regulation of protein kinase A signaling
903	415612	ENSGALG00000000264	1018	1232	797	900	856	743	1502	1384	1028	951	1044	1519	1969	1000	1362	1176	862	872	0.943886	0.956479	0.943886	hippo signaling
904	415612	ENSGALG00000000264	1018	1232	797	900	856	743	1502	1384	1028	951	1044	1519	1969	1000	1362	1176	862	872	0.943886	0.956479	0.943886	ubiquitin-protein transferase activity
905	415612	ENSGALG00000000264	1018	1232	797	900	856	743	1502	1384	1028	951	1044	1519	1969	1000	1362	1176	862	872	0.943886	0.956479	0.943886	protein ubiquitination
906	415612	ENSGALG00000000264	1018	1232	797	900	856	743	1502	1384	1028	951	1044	1519	1969	1000	1362	1176	862	872	0.943886	0.956479	0.943886	metal ion binding
907	415612	ENSGALG00000000264	1018	1232	797	900	856	743	1502	1384	1028	951	1044	1519	1969	1000	1362	1176	862	872	0.943886	0.956479	0.943886	membrane
908	415612	ENSGALG00000000264	1018	1232	797	900	856	743	1502	1384	1028	951	1044	1519	1969	1000	1362	1176	862	872	0.943886	0.956479	0.943886	integral component of membrane
909	415614	ENSGALG00000000273	86	102	76	77	38	57	132	166	122	65	75	176	142	73	132	131	69	91	0.938272	0.956884	0.938272	peptidyl-tyrosine phosphorylation
910	415614	ENSGALG00000000273	86	102	76	77	38	57	132	166	122	65	75	176	142	73	132	131	69	91	0.938272	0.956884	0.938272	nucleotide binding
911	415614	ENSGALG00000000273	86	102	76	77	38	57	132	166	122	65	75	176	142	73	132	131	69	91	0.938272	0.956884	0.938272	ATP binding
912	415614	ENSGALG00000000273	86	102	76	77	38	57	132	166	122	65	75	176	142	73	132	131	69	91	0.938272	0.956884	0.938272	kinase activity
913	415614	ENSGALG00000000273	86	102	76	77	38	57	132	166	122	65	75	176	142	73	132	131	69	91	0.938272	0.956884	0.938272	transferase activity
914	415614	ENSGALG00000000273	86	102	76	77	38	57	132	166	122	65	75	176	142	73	132	131	69	91	0.938272	0.956884	0.938272	phosphorylation
915	415614	ENSGALG00000000273	86	102	76	77	38	57	132	166	122	65	75	176	142	73	132	131	69	91	0.938272	0.956884	0.938272	protein kinase activity
916	415614	ENSGALG00000000273	86	102	76	77	38	57	132	166	122	65	75	176	142	73	132	131	69	91	0.938272	0.956884	0.938272	protein phosphorylation
917	415614	ENSGALG00000000273	86	102	76	77	38	57	132	166	122	65	75	176	142	73	132	131	69	91	0.938272	0.956884	0.938272	protein tyrosine kinase activity
918	415614	ENSGALG00000000273	86	102	76	77	38	57	132	166	122	65	75	176	142	73	132	131	69	91	0.938272	0.956884	0.938272	non-membrane spanning protein tyrosine kinase activity
919	415614	ENSGALG00000000273	86	102	76	77	38	57	132	166	122	65	75	176	142	73	132	131	69	91	0.938272	0.956884	0.938272	signaling receptor binding
920	415614	ENSGALG00000000273	86	102	76	77	38	57	132	166	122	65	75	176	142	73	132	131	69	91	0.938272	0.956884	0.938272	innate immune response
921	415614	ENSGALG00000000273	86	102	76	77	38	57	132	166	122	65	75	176	142	73	132	131	69	91	0.938272	0.956884	0.938272	transmembrane receptor protein tyrosine kinase signaling pathway
922	415614	ENSGALG00000000273	86	102	76	77	38	57	132	166	122	65	75	176	142	73	132	131	69	91	0.938272	0.956884	0.938272	cytoplasm
923	415614	ENSGALG00000000273	86	102	76	77	38	57	132	166	122	65	75	176	142	73	132	131	69	91	0.938272	0.956884	0.938272	chemotaxis
924	415614	ENSGALG00000000273	86	102	76	77	38	57	132	166	122	65	75	176	142	73	132	131	69	91	0.938272	0.956884	0.938272	cell adhesion
925	415614	ENSGALG00000000273	86	102	76	77	38	57	132	166	122	65	75	176	142	73	132	131	69	91	0.938272	0.956884	0.938272	cytoskeleton
926	415614	ENSGALG00000000273	86	102	76	77	38	57	132	166	122	65	75	176	142	73	132	131	69	91	0.938272	0.956884	0.938272	cell differentiation
927	415614	ENSGALG00000000273	86	102	76	77	38	57	132	166	122	65	75	176	142	73	132	131	69	91	0.938272	0.956884	0.938272	positive regulation of cell migration
928	415614	ENSGALG00000000273	86	102	76	77	38	57	132	166	122	65	75	176	142	73	132	131	69	91	0.938272	0.956884	0.938272	positive regulation of NF-kappaB transcription factor activity
929	415614	ENSGALG00000000273	86	102	76	77	38	57	132	166	122	65	75	176	142	73	132	131	69	91	0.938272	0.956884	0.938272	extrinsic component of cytoplasmic side of plasma membrane
930	415614	ENSGALG00000000273	86	102	76	77	38	57	132	166	122	65	75	176	142	73	132	131	69	91	0.938272	0.956884	0.938272	regulation of cell population proliferation
931	415614	ENSGALG00000000273	86	102	76	77	38	57	132	166	122	65	75	176	142	73	132	131	69	91	0.938272	0.956884	0.938272	peptidyl-tyrosine autophosphorylation
932	415614	ENSGALG00000000273	86	102	76	77	38	57	132	166	122	65	75	176	142	73	132	131	69	91	0.938272	0.956884	0.938272	actin cytoskeleton reorganization
933	415614	ENSGALG00000000273	86	102	76	77	38	57	132	166	122	65	75	176	142	73	132	131	69	91	0.938272	0.956884	0.938272	cell population proliferation
934	415614	ENSGALG00000000273	86	102	76	77	38	57	132	166	122	65	75	176	142	73	132	131	69	91	0.938272	0.956884	0.938272	regulation of mast cell degranulation
935	415614	ENSGALG00000000273	86	102	76	77	38	57	132	166	122	65	75	176	142	73	132	131	69	91	0.938272	0.956884	0.938272	epidermal growth factor receptor binding
936	415614	ENSGALG00000000273	86	102	76	77	38	57	132	166	122	65	75	176	142	73	132	131	69	91	0.938272	0.956884	0.938272	protein phosphatase 1 binding
937	415614	ENSGALG00000000273	86	102	76	77	38	57	132	166	122	65	75	176	142	73	132	131	69	91	0.938272	0.956884	0.938272	lipid binding
938	415614	ENSGALG00000000273	86	102	76	77	38	57	132	166	122	65	75	176	142	73	132	131	69	91	0.938272	0.956884	0.938272	microtubule cytoskeleton organization
939	415614	ENSGALG00000000273	86	102	76	77	38	57	132	166	122	65	75	176	142	73	132	131	69	91	0.938272	0.956884	0.938272	regulation of protein phosphorylation
940	415614	ENSGALG00000000273	86	102	76	77	38	57	132	166	122	65	75	176	142	73	132	131	69	91	0.938272	0.956884	0.938272	signal transduction
941	415614	ENSGALG00000000273	86	102	76	77	38	57	132	166	122	65	75	176	142	73	132	131	69	91	0.938272	0.956884	0.938272	tyrosine phosphorylation of STAT protein
942	415614	ENSGALG00000000273	86	102	76	77	38	57	132	166	122	65	75	176	142	73	132	131	69	91	0.938272	0.956884	0.938272	positive regulation of cell population proliferation
943	415614	ENSGALG00000000273	86	102	76	77	38	57	132	166	122	65	75	176	142	73	132	131	69	91	0.938272	0.956884	0.938272	regulation of lamellipodium assembly
944	415614	ENSGALG00000000273	86	102	76	77	38	57	132	166	122	65	75	176	142	73	132	131	69	91	0.938272	0.956884	0.938272	regulation of fibroblast migration
945	415614	ENSGALG00000000273	86	102	76	77	38	57	132	166	122	65	75	176	142	73	132	131	69	91	0.938272	0.956884	0.938272	cytokine-mediated signaling pathway
946	415614	ENSGALG00000000273	86	102	76	77	38	57	132	166	122	65	75	176	142	73	132	131	69	91	0.938272	0.956884	0.938272	positive regulation of actin filament polymerization
947	415614	ENSGALG00000000273	86	102	76	77	38	57	132	166	122	65	75	176	142	73	132	131	69	91	0.938272	0.956884	0.938272	response to lipopolysaccharide
948	415614	ENSGALG00000000273	86	102	76	77	38	57	132	166	122	65	75	176	142	73	132	131	69	91	0.938272	0.956884	0.938272	cellular response to insulin stimulus
949	415614	ENSGALG00000000273	86	102	76	77	38	57	132	166	122	65	75	176	142	73	132	131	69	91	0.938272	0.956884	0.938272	negative regulation of mast cell activation involved in immune response
950	415614	ENSGALG00000000273	86	102	76	77	38	57	132	166	122	65	75	176	142	73	132	131	69	91	0.938272	0.956884	0.938272	substrate adhesion-dependent cell spreading
951	415614	ENSGALG00000000273	86	102	76	77	38	57	132	166	122	65	75	176	142	73	132	131	69	91	0.938272	0.956884	0.938272	cellular response to reactive oxygen species
952	415614	ENSGALG00000000273	86	102	76	77	38	57	132	166	122	65	75	176	142	73	132	131	69	91	0.938272	0.956884	0.938272	extracellular matrix-cell signaling
953	415614	ENSGALG00000000273	86	102	76	77	38	57	132	166	122	65	75	176	142	73	132	131	69	91	0.938272	0.956884	0.938272	cellular response to macrophage colony-stimulating factor stimulus
954	415614	ENSGALG00000000273	86	102	76	77	38	57	132	166	122	65	75	176	142	73	132	131	69	91	0.938272	0.956884	0.938272	response to platelet-derived growth factor
955	415614	ENSGALG00000000273	86	102	76	77	38	57	132	166	122	65	75	176	142	73	132	131	69	91	0.938272	0.956884	0.938272	insulin receptor signaling pathway via phosphatidylinositol 3-kinase
956	415614	ENSGALG00000000273	86	102	76	77	38	57	132	166	122	65	75	176	142	73	132	131	69	91	0.938272	0.956884	0.938272	Fc-epsilon receptor signaling pathway
957	415614	ENSGALG00000000273	86	102	76	77	38	57	132	166	122	65	75	176	142	73	132	131	69	91	0.938272	0.956884	0.938272	Kit signaling pathway
958	415614	ENSGALG00000000273	86	102	76	77	38	57	132	166	122	65	75	176	142	73	132	131	69	91	0.938272	0.956884	0.938272	regulation of epidermal growth factor receptor signaling pathway
959	415614	ENSGALG00000000273	86	102	76	77	38	57	132	166	122	65	75	176	142	73	132	131	69	91	0.938272	0.956884	0.938272	cell-cell adhesion mediated by cadherin
960	415614	ENSGALG00000000273	86	102	76	77	38	57	132	166	122	65	75	176	142	73	132	131	69	91	0.938272	0.956884	0.938272	protein autophosphorylation
961	415614	ENSGALG00000000273	86	102	76	77	38	57	132	166	122	65	75	176	142	73	132	131	69	91	0.938272	0.956884	0.938272	platelet-derived growth factor receptor signaling pathway
962	415614	ENSGALG00000000273	86	102	76	77	38	57	132	166	122	65	75	176	142	73	132	131	69	91	0.938272	0.956884	0.938272	diapedesis
963	415614	ENSGALG00000000273	86	102	76	77	38	57	132	166	122	65	75	176	142	73	132	131	69	91	0.938272	0.956884	0.938272	interleukin-6-mediated signaling pathway
964	415614	ENSGALG00000000273	86	102	76	77	38	57	132	166	122	65	75	176	142	73	132	131	69	91	0.938272	0.956884	0.938272	nuclear chromatin
965	415614	ENSGALG00000000273	86	102	76	77	38	57	132	166	122	65	75	176	142	73	132	131	69	91	0.938272	0.956884	0.938272	nucleus
966	415614	ENSGALG00000000273	86	102	76	77	38	57	132	166	122	65	75	176	142	73	132	131	69	91	0.938272	0.956884	0.938272	cytosol
967	415614	ENSGALG00000000273	86	102	76	77	38	57	132	166	122	65	75	176	142	73	132	131	69	91	0.938272	0.956884	0.938272	actin cytoskeleton
968	415614	ENSGALG00000000273	86	102	76	77	38	57	132	166	122	65	75	176	142	73	132	131	69	91	0.938272	0.956884	0.938272	microtubule cytoskeleton
969	415614	ENSGALG00000000273	86	102	76	77	38	57	132	166	122	65	75	176	142	73	132	131	69	91	0.938272	0.956884	0.938272	lamellipodium
970	415614	ENSGALG00000000273	86	102	76	77	38	57	132	166	122	65	75	176	142	73	132	131	69	91	0.938272	0.956884	0.938272	cell junction
971	771308	ENSGALG00000000274	0	0	0	0	0	0	0	0	0	0	1	0	0	0	0	0	0	0	NA	NA	NA	membrane
972	771308	ENSGALG00000000274	0	0	0	0	0	0	0	0	0	0	1	0	0	0	0	0	0	0	NA	NA	NA	integral component of membrane
973	771308	ENSGALG00000000274	0	0	0	0	0	0	0	0	0	0	1	0	0	0	0	0	0	0	NA	NA	NA	G protein-coupled receptor activity
974	771308	ENSGALG00000000274	0	0	0	0	0	0	0	0	0	0	1	0	0	0	0	0	0	0	NA	NA	NA	G protein-coupled receptor signaling pathway
975	771308	ENSGALG00000000274	0	0	0	0	0	0	0	0	0	0	1	0	0	0	0	0	0	0	NA	NA	NA	plasma membrane
976	771308	ENSGALG00000000274	0	0	0	0	0	0	0	0	0	0	1	0	0	0	0	0	0	0	NA	NA	NA	G protein-coupled peptide receptor activity
977	771308	ENSGALG00000000274	0	0	0	0	0	0	0	0	0	0	1	0	0	0	0	0	0	0	NA	NA	NA	transmembrane signaling receptor activity
978	771308	ENSGALG00000000274	0	0	0	0	0	0	0	0	0	0	1	0	0	0	0	0	0	0	NA	NA	NA	cell surface receptor signaling pathway
979	771308	ENSGALG00000000274	0	0	0	0	0	0	0	0	0	0	1	0	0	0	0	0	0	0	NA	NA	NA	peptide hormone binding
980	771308	ENSGALG00000000274	0	0	0	0	0	0	0	0	0	0	1	0	0	0	0	0	0	0	NA	NA	NA	adenylate cyclase-modulating G protein-coupled receptor signaling pathway
981	771308	ENSGALG00000000274	0	0	0	0	0	0	0	0	0	0	1	0	0	0	0	0	0	0	NA	NA	NA	vasoactive intestinal polypeptide receptor activity
982	419526	ENSGALG00000000275	457	607	661	578	612	645	625	412	491	542	623	484	579	586	476	501	493	536	0.993774	0.956479	0.993774	intracellular signal transduction
983	419526	ENSGALG00000000275	457	607	661	578	612	645	625	412	491	542	623	484	579	586	476	501	493	536	0.993774	0.956479	0.993774	protein homooligomerization
984	419526	ENSGALG00000000275	457	607	661	578	612	645	625	412	491	542	623	484	579	586	476	501	493	536	0.993774	0.956479	0.993774	identical protein binding
985	419526	ENSGALG00000000275	457	607	661	578	612	645	625	412	491	542	623	484	579	586	476	501	493	536	0.993774	0.956479	0.993774	protein self-association
986	419526	ENSGALG00000000275	457	607	661	578	612	645	625	412	491	542	623	484	579	586	476	501	493	536	0.993774	0.956479	0.993774	cullin family protein binding
987	419526	ENSGALG00000000275	457	607	661	578	612	645	625	412	491	542	623	484	579	586	476	501	493	536	0.993774	0.956479	0.993774	protein binding
988	415615	ENSGALG00000000276	6	4	9	0	6	5	4	6	4	8	5	15	3	1	4	8	1	1	0.660862	0.956479	0.660862	nucleus
989	415615	ENSGALG00000000276	6	4	9	0	6	5	4	6	4	8	5	15	3	1	4	8	1	1	0.660862	0.956479	0.660862	cytosol
990	415615	ENSGALG00000000276	6	4	9	0	6	5	4	6	4	8	5	15	3	1	4	8	1	1	0.660862	0.956479	0.660862	SCF ubiquitin ligase complex
991	415615	ENSGALG00000000276	6	4	9	0	6	5	4	6	4	8	5	15	3	1	4	8	1	1	0.660862	0.956479	0.660862	SCF-dependent proteasomal ubiquitin-dependent protein catabolic process
992	415615	ENSGALG00000000276	6	4	9	0	6	5	4	6	4	8	5	15	3	1	4	8	1	1	0.660862	0.956479	0.660862	entrainment of circadian clock by photoperiod
993	415615	ENSGALG00000000276	6	4	9	0	6	5	4	6	4	8	5	15	3	1	4	8	1	1	0.660862	0.956479	0.660862	regulation of cell cycle
994	415615	ENSGALG00000000276	6	4	9	0	6	5	4	6	4	8	5	15	3	1	4	8	1	1	0.660862	0.956479	0.660862	G2/M transition of mitotic cell cycle
995	415615	ENSGALG00000000276	6	4	9	0	6	5	4	6	4	8	5	15	3	1	4	8	1	1	0.660862	0.956479	0.660862	protein polyubiquitination
996	415615	ENSGALG00000000276	6	4	9	0	6	5	4	6	4	8	5	15	3	1	4	8	1	1	0.660862	0.956479	0.660862	protein quality control for misfolded or incompletely synthesized proteins
997	415615	ENSGALG00000000276	6	4	9	0	6	5	4	6	4	8	5	15	3	1	4	8	1	1	0.660862	0.956479	0.660862	regulation of smoothened signaling pathway
998	415615	ENSGALG00000000276	6	4	9	0	6	5	4	6	4	8	5	15	3	1	4	8	1	1	0.660862	0.956479	0.660862	protein ubiquitination
999	415615	ENSGALG00000000276	6	4	9	0	6	5	4	6	4	8	5	15	3	1	4	8	1	1	0.660862	0.956479	0.660862	proteasome-mediated ubiquitin-dependent protein catabolic process
1000	415615	ENSGALG00000000276	6	4	9	0	6	5	4	6	4	8	5	15	3	1	4	8	1	1	0.660862	0.956479	0.660862	nucleoplasm
1001	415615	ENSGALG00000000276	6	4	9	0	6	5	4	6	4	8	5	15	3	1	4	8	1	1	0.660862	0.956479	0.660862	cytoplasm
1002	415615	ENSGALG00000000276	6	4	9	0	6	5	4	6	4	8	5	15	3	1	4	8	1	1	0.660862	0.956479	0.660862	protein binding
1003	770134	ENSGALG00000000277	7	11	11	11	19	8	8	10	3	7	7	7	2	1	7	3	2	2	0.931999	0.956479	0.931999	gonadotropin hormone-releasing hormone activity
1004	770134	ENSGALG00000000277	7	11	11	11	19	8	8	10	3	7	7	7	2	1	7	3	2	2	0.931999	0.956479	0.931999	extracellular space
1005	770134	ENSGALG00000000277	7	11	11	11	19	8	8	10	3	7	7	7	2	1	7	3	2	2	0.931999	0.956479	0.931999	hormone activity
1006	770134	ENSGALG00000000277	7	11	11	11	19	8	8	10	3	7	7	7	2	1	7	3	2	2	0.931999	0.956479	0.931999	signal transduction
1007	770134	ENSGALG00000000277	7	11	11	11	19	8	8	10	3	7	7	7	2	1	7	3	2	2	0.931999	0.956479	0.931999	extracellular region
1008	770134	ENSGALG00000000277	7	11	11	11	19	8	8	10	3	7	7	7	2	1	7	3	2	2	0.931999	0.956479	0.931999	multicellular organism development
1009	770134	ENSGALG00000000277	7	11	11	11	19	8	8	10	3	7	7	7	2	1	7	3	2	2	0.931999	0.956479	0.931999	axon
1010	770134	ENSGALG00000000277	7	11	11	11	19	8	8	10	3	7	7	7	2	1	7	3	2	2	0.931999	0.956479	0.931999	perikaryon
1011	770134	ENSGALG00000000277	7	11	11	11	19	8	8	10	3	7	7	7	2	1	7	3	2	2	0.931999	0.956479	0.931999	regulation of gene expression
1012	770134	ENSGALG00000000277	7	11	11	11	19	8	8	10	3	7	7	7	2	1	7	3	2	2	0.931999	0.956479	0.931999	luteinizing hormone secretion
1013	770134	ENSGALG00000000277	7	11	11	11	19	8	8	10	3	7	7	7	2	1	7	3	2	2	0.931999	0.956479	0.931999	positive regulation of luteinizing hormone secretion
1014	770134	ENSGALG00000000277	7	11	11	11	19	8	8	10	3	7	7	7	2	1	7	3	2	2	0.931999	0.956479	0.931999	response to alkaloid
1015	770134	ENSGALG00000000277	7	11	11	11	19	8	8	10	3	7	7	7	2	1	7	3	2	2	0.931999	0.956479	0.931999	response to ethanol
1016	770134	ENSGALG00000000277	7	11	11	11	19	8	8	10	3	7	7	7	2	1	7	3	2	2	0.931999	0.956479	0.931999	regulation of hormone biosynthetic process
1017	770134	ENSGALG00000000277	7	11	11	11	19	8	8	10	3	7	7	7	2	1	7	3	2	2	0.931999	0.956479	0.931999	response to steroid hormone
1018	770134	ENSGALG00000000277	7	11	11	11	19	8	8	10	3	7	7	7	2	1	7	3	2	2	0.931999	0.956479	0.931999	response to serotonin
1019	770134	ENSGALG00000000277	7	11	11	11	19	8	8	10	3	7	7	7	2	1	7	3	2	2	0.931999	0.956479	0.931999	regulation of ovarian follicle development
1020	770134	ENSGALG00000000277	7	11	11	11	19	8	8	10	3	7	7	7	2	1	7	3	2	2	0.931999	0.956479	0.931999	regulation of testosterone secretion
1021	770134	ENSGALG00000000277	7	11	11	11	19	8	8	10	3	7	7	7	2	1	7	3	2	2	0.931999	0.956479	0.931999	negative regulation of neuron migration
1022	770134	ENSGALG00000000277	7	11	11	11	19	8	8	10	3	7	7	7	2	1	7	3	2	2	0.931999	0.956479	0.931999	protein binding
1023	770134	ENSGALG00000000277	7	11	11	11	19	8	8	10	3	7	7	7	2	1	7	3	2	2	0.931999	0.956479	0.931999	gonadotropin-releasing hormone receptor binding
1024	770134	ENSGALG00000000277	7	11	11	11	19	8	8	10	3	7	7	7	2	1	7	3	2	2	0.931999	0.956479	0.931999	reproduction
1025	396100	ENSGALG00000000280	0	0	0	0	0	0	0	0	0	0	0	0	0	0	0	0	0	0	NA	NA	NA	membrane
1026	396100	ENSGALG00000000280	0	0	0	0	0	0	0	0	0	0	0	0	0	0	0	0	0	0	NA	NA	NA	plasma membrane
1027	396100	ENSGALG00000000280	0	0	0	0	0	0	0	0	0	0	0	0	0	0	0	0	0	0	NA	NA	NA	anchored component of external side of plasma membrane
1028	396100	ENSGALG00000000280	0	0	0	0	0	0	0	0	0	0	0	0	0	0	0	0	0	0	NA	NA	NA	axon guidance
1029	396100	ENSGALG00000000280	0	0	0	0	0	0	0	0	0	0	0	0	0	0	0	0	0	0	NA	NA	NA	anchored component of membrane
1030	396100	ENSGALG00000000280	0	0	0	0	0	0	0	0	0	0	0	0	0	0	0	0	0	0	NA	NA	NA	ephrin receptor binding
1031	396100	ENSGALG00000000280	0	0	0	0	0	0	0	0	0	0	0	0	0	0	0	0	0	0	NA	NA	NA	ephrin receptor signaling pathway
1032	396100	ENSGALG00000000280	0	0	0	0	0	0	0	0	0	0	0	0	0	0	0	0	0	0	NA	NA	NA	regulation of actin cytoskeleton organization
1033	396100	ENSGALG00000000280	0	0	0	0	0	0	0	0	0	0	0	0	0	0	0	0	0	0	NA	NA	NA	regulation of cell-cell adhesion
1034	396100	ENSGALG00000000280	0	0	0	0	0	0	0	0	0	0	0	0	0	0	0	0	0	0	NA	NA	NA	negative chemotaxis
1035	396100	ENSGALG00000000280	0	0	0	0	0	0	0	0	0	0	0	0	0	0	0	0	0	0	NA	NA	NA	neurotrophin TRKB receptor binding
1036	396100	ENSGALG00000000280	0	0	0	0	0	0	0	0	0	0	0	0	0	0	0	0	0	0	NA	NA	NA	chemorepellent activity
1037	396100	ENSGALG00000000280	0	0	0	0	0	0	0	0	0	0	0	0	0	0	0	0	0	0	NA	NA	NA	regulation of cell morphogenesis
1038	396100	ENSGALG00000000280	0	0	0	0	0	0	0	0	0	0	0	0	0	0	0	0	0	0	NA	NA	NA	retinal ganglion cell axon guidance
1039	396100	ENSGALG00000000280	0	0	0	0	0	0	0	0	0	0	0	0	0	0	0	0	0	0	NA	NA	NA	regulation of GTPase activity
1040	396100	ENSGALG00000000280	0	0	0	0	0	0	0	0	0	0	0	0	0	0	0	0	0	0	NA	NA	NA	collateral sprouting
1041	396100	ENSGALG00000000280	0	0	0	0	0	0	0	0	0	0	0	0	0	0	0	0	0	0	NA	NA	NA	positive regulation of collateral sprouting
1042	396100	ENSGALG00000000280	0	0	0	0	0	0	0	0	0	0	0	0	0	0	0	0	0	0	NA	NA	NA	positive regulation of peptidyl-tyrosine phosphorylation
1043	396100	ENSGALG00000000280	0	0	0	0	0	0	0	0	0	0	0	0	0	0	0	0	0	0	NA	NA	NA	regulation of focal adhesion assembly
1044	396100	ENSGALG00000000280	0	0	0	0	0	0	0	0	0	0	0	0	0	0	0	0	0	0	NA	NA	NA	positive regulation of synapse assembly
1045	396100	ENSGALG00000000280	0	0	0	0	0	0	0	0	0	0	0	0	0	0	0	0	0	0	NA	NA	NA	regulation of insulin secretion involved in cellular response to glucose stimulus
1046	396100	ENSGALG00000000280	0	0	0	0	0	0	0	0	0	0	0	0	0	0	0	0	0	0	NA	NA	NA	regulation of microtubule cytoskeleton organization
1047	396100	ENSGALG00000000280	0	0	0	0	0	0	0	0	0	0	0	0	0	0	0	0	0	0	NA	NA	NA	cellular response to follicle-stimulating hormone stimulus
1048	396100	ENSGALG00000000280	0	0	0	0	0	0	0	0	0	0	0	0	0	0	0	0	0	0	NA	NA	NA	negative regulation of substrate adhesion-dependent cell spreading
1049	396100	ENSGALG00000000280	0	0	0	0	0	0	0	0	0	0	0	0	0	0	0	0	0	0	NA	NA	NA	cellular response to forskolin
1050	396100	ENSGALG00000000280	0	0	0	0	0	0	0	0	0	0	0	0	0	0	0	0	0	0	NA	NA	NA	basement membrane
1051	396100	ENSGALG00000000280	0	0	0	0	0	0	0	0	0	0	0	0	0	0	0	0	0	0	NA	NA	NA	adherens junction
1052	396100	ENSGALG00000000280	0	0	0	0	0	0	0	0	0	0	0	0	0	0	0	0	0	0	NA	NA	NA	cell periphery
1053	396230	ENSGALG00000000284	0	0	0	0	0	0	0	0	0	0	0	0	0	0	0	0	0	0	NA	NA	NA	nucleus
1054	396230	ENSGALG00000000284	0	0	0	0	0	0	0	0	0	0	0	0	0	0	0	0	0	0	NA	NA	NA	DNA binding
1055	396230	ENSGALG00000000284	0	0	0	0	0	0	0	0	0	0	0	0	0	0	0	0	0	0	NA	NA	NA	DNA-binding transcription activator activity, RNA polymerase II-specific
1056	396230	ENSGALG00000000284	0	0	0	0	0	0	0	0	0	0	0	0	0	0	0	0	0	0	NA	NA	NA	regulation of transcription, DNA-templated
1057	396230	ENSGALG00000000284	0	0	0	0	0	0	0	0	0	0	0	0	0	0	0	0	0	0	NA	NA	NA	multicellular organism development
1058	396230	ENSGALG00000000284	0	0	0	0	0	0	0	0	0	0	0	0	0	0	0	0	0	0	NA	NA	NA	DNA-binding transcription factor activity
1059	396230	ENSGALG00000000284	0	0	0	0	0	0	0	0	0	0	0	0	0	0	0	0	0	0	NA	NA	NA	anterior/posterior pattern specification
1060	396230	ENSGALG00000000284	0	0	0	0	0	0	0	0	0	0	0	0	0	0	0	0	0	0	NA	NA	NA	embryonic skeletal system morphogenesis
1061	396230	ENSGALG00000000284	0	0	0	0	0	0	0	0	0	0	0	0	0	0	0	0	0	0	NA	NA	NA	RNA polymerase II regulatory region sequence-specific DNA binding
1062	396230	ENSGALG00000000284	0	0	0	0	0	0	0	0	0	0	0	0	0	0	0	0	0	0	NA	NA	NA	activating transcription factor binding
1063	396230	ENSGALG00000000284	0	0	0	0	0	0	0	0	0	0	0	0	0	0	0	0	0	0	NA	NA	NA	skeletal system development
1064	396230	ENSGALG00000000284	0	0	0	0	0	0	0	0	0	0	0	0	0	0	0	0	0	0	NA	NA	NA	DNA-binding transcription factor activity, RNA polymerase II-specific
1065	396230	ENSGALG00000000284	0	0	0	0	0	0	0	0	0	0	0	0	0	0	0	0	0	0	NA	NA	NA	sequence-specific DNA binding
1066	396230	ENSGALG00000000284	0	0	0	0	0	0	0	0	0	0	0	0	0	0	0	0	0	0	NA	NA	NA	negative regulation of transcription by RNA polymerase II
1067	396230	ENSGALG00000000284	0	0	0	0	0	0	0	0	0	0	0	0	0	0	0	0	0	0	NA	NA	NA	morphogenesis of an epithelial sheet
1068	396230	ENSGALG00000000284	0	0	0	0	0	0	0	0	0	0	0	0	0	0	0	0	0	0	NA	NA	NA	cell population proliferation
1069	396230	ENSGALG00000000284	0	0	0	0	0	0	0	0	0	0	0	0	0	0	0	0	0	0	NA	NA	NA	hemopoiesis
1070	396230	ENSGALG00000000284	0	0	0	0	0	0	0	0	0	0	0	0	0	0	0	0	0	0	NA	NA	NA	positive regulation of transcription by RNA polymerase II
1071	396230	ENSGALG00000000284	0	0	0	0	0	0	0	0	0	0	0	0	0	0	0	0	0	0	NA	NA	NA	somatic stem cell division
1072	396230	ENSGALG00000000284	0	0	0	0	0	0	0	0	0	0	0	0	0	0	0	0	0	0	NA	NA	NA	spleen development
1073	396230	ENSGALG00000000284	0	0	0	0	0	0	0	0	0	0	0	0	0	0	0	0	0	0	NA	NA	NA	bone marrow development
1074	396230	ENSGALG00000000284	0	0	0	0	0	0	0	0	0	0	0	0	0	0	0	0	0	0	NA	NA	NA	skeletal system morphogenesis
1075	396230	ENSGALG00000000284	0	0	0	0	0	0	0	0	0	0	0	0	0	0	0	0	0	0	NA	NA	NA	definitive hemopoiesis
1076	396230	ENSGALG00000000284	0	0	0	0	0	0	0	0	0	0	0	0	0	0	0	0	0	0	NA	NA	NA	hematopoietic stem cell differentiation
1077	396230	ENSGALG00000000284	0	0	0	0	0	0	0	0	0	0	0	0	0	0	0	0	0	0	NA	NA	NA	positive regulation of stem cell differentiation
1078	396230	ENSGALG00000000284	0	0	0	0	0	0	0	0	0	0	0	0	0	0	0	0	0	0	NA	NA	NA	nucleoplasm
1079	396230	ENSGALG00000000284	0	0	0	0	0	0	0	0	0	0	0	0	0	0	0	0	0	0	NA	NA	NA	centrosome
1080	396230	ENSGALG00000000284	0	0	0	0	0	0	0	0	0	0	0	0	0	0	0	0	0	0	NA	NA	NA	sequence-specific double-stranded DNA binding
1081	100858010	ENSGALG00000000293	0	0	1	0	1	1	1	1	1	0	1	1	0	2	0	0	0	0	NA	NA	NA	extracellular region
1082	100858010	ENSGALG00000000293	0	0	1	0	1	1	1	1	1	0	1	1	0	2	0	0	0	0	NA	NA	NA	extracellular space
1083	100858010	ENSGALG00000000293	0	0	1	0	1	1	1	1	1	0	1	1	0	2	0	0	0	0	NA	NA	NA	endopeptidase inhibitor activity
1084	100858010	ENSGALG00000000293	0	0	1	0	1	1	1	1	1	0	1	1	0	2	0	0	0	0	NA	NA	NA	negative regulation of endopeptidase activity
1085	100858010	ENSGALG00000000293	0	0	1	0	1	1	1	1	1	0	1	1	0	2	0	0	0	0	NA	NA	NA	serine-type endopeptidase inhibitor activity
1086	100858010	ENSGALG00000000293	0	0	1	0	1	1	1	1	1	0	1	1	0	2	0	0	0	0	NA	NA	NA	peptidase inhibitor activity
1087	100858010	ENSGALG00000000293	0	0	1	0	1	1	1	1	1	0	1	1	0	2	0	0	0	0	NA	NA	NA	negative regulation of peptidase activity
1088	771410	ENSGALG00000000295	163	127	166	137	154	193	197	120	126	106	82	127	193	183	141	101	202	98	0.617583	0.931658	0.617583	homophilic cell adhesion via plasma membrane adhesion molecules
1089	771410	ENSGALG00000000295	163	127	166	137	154	193	197	120	126	106	82	127	193	183	141	101	202	98	0.617583	0.931658	0.617583	synapse
1090	771410	ENSGALG00000000295	163	127	166	137	154	193	197	120	126	106	82	127	193	183	141	101	202	98	0.617583	0.931658	0.617583	synapse assembly
1091	771410	ENSGALG00000000295	163	127	166	137	154	193	197	120	126	106	82	127	193	183	141	101	202	98	0.617583	0.931658	0.617583	retina layer formation
1092	771410	ENSGALG00000000295	163	127	166	137	154	193	197	120	126	106	82	127	193	183	141	101	202	98	0.617583	0.931658	0.617583	protein binding
1093	426230	ENSGALG00000000296	1715	1950	1813	1814	1936	1839	2477	1889	2325	2044	2340	1964	2173	2143	1908	2021	2017	2343	0.857515	0.999663	0.857515	membrane
1094	426230	ENSGALG00000000296	1715	1950	1813	1814	1936	1839	2477	1889	2325	2044	2340	1964	2173	2143	1908	2021	2017	2343	0.857515	0.999663	0.857515	integral component of membrane
1095	421158	ENSGALG00000000299	2	1	2	1	0	6	4	0	1	1	1	1	2	1	0	4	7	1	0.893689	NA	0.893689	desmosome
1096	421158	ENSGALG00000000299	2	1	2	1	0	6	4	0	1	1	1	1	2	1	0	4	7	1	0.893689	NA	0.893689	nucleus
1097	421158	ENSGALG00000000299	2	1	2	1	0	6	4	0	1	1	1	1	2	1	0	4	7	1	0.893689	NA	0.893689	plasma membrane
1098	421158	ENSGALG00000000299	2	1	2	1	0	6	4	0	1	1	1	1	2	1	0	4	7	1	0.893689	NA	0.893689	cytoplasm
1099	421158	ENSGALG00000000299	2	1	2	1	0	6	4	0	1	1	1	1	2	1	0	4	7	1	0.893689	NA	0.893689	cell adhesion
1100	421158	ENSGALG00000000299	2	1	2	1	0	6	4	0	1	1	1	1	2	1	0	4	7	1	0.893689	NA	0.893689	cell-cell adhesion
1101	421158	ENSGALG00000000299	2	1	2	1	0	6	4	0	1	1	1	1	2	1	0	4	7	1	0.893689	NA	0.893689	cadherin binding
1102	421158	ENSGALG00000000299	2	1	2	1	0	6	4	0	1	1	1	1	2	1	0	4	7	1	0.893689	NA	0.893689	cell junction
1103	421158	ENSGALG00000000299	2	1	2	1	0	6	4	0	1	1	1	1	2	1	0	4	7	1	0.893689	NA	0.893689	cell-cell junction
1104	421158	ENSGALG00000000299	2	1	2	1	0	6	4	0	1	1	1	1	2	1	0	4	7	1	0.893689	NA	0.893689	cell-cell junction assembly
1105	421158	ENSGALG00000000299	2	1	2	1	0	6	4	0	1	1	1	1	2	1	0	4	7	1	0.893689	NA	0.893689	adherens junction
1106	421158	ENSGALG00000000299	2	1	2	1	0	6	4	0	1	1	1	1	2	1	0	4	7	1	0.893689	NA	0.893689	lamin binding
1107	421158	ENSGALG00000000299	2	1	2	1	0	6	4	0	1	1	1	1	2	1	0	4	7	1	0.893689	NA	0.893689	positive regulation of gene expression
1108	421158	ENSGALG00000000299	2	1	2	1	0	6	4	0	1	1	1	1	2	1	0	4	7	1	0.893689	NA	0.893689	intermediate filament bundle assembly
1109	421158	ENSGALG00000000299	2	1	2	1	0	6	4	0	1	1	1	1	2	1	0	4	7	1	0.893689	NA	0.893689	negative regulation of mRNA catabolic process
1110	421158	ENSGALG00000000299	2	1	2	1	0	6	4	0	1	1	1	1	2	1	0	4	7	1	0.893689	NA	0.893689	nucleoplasm
1111	421158	ENSGALG00000000299	2	1	2	1	0	6	4	0	1	1	1	1	2	1	0	4	7	1	0.893689	NA	0.893689	messenger ribonucleoprotein complex
1112	421158	ENSGALG00000000299	2	1	2	1	0	6	4	0	1	1	1	1	2	1	0	4	7	1	0.893689	NA	0.893689	protein binding
1113	396433	ENSGALG00000000302	0	0	0	0	0	0	0	0	0	0	0	0	0	0	0	0	0	0	NA	NA	NA	calcium ion binding
1114	396433	ENSGALG00000000302	0	0	0	0	0	0	0	0	0	0	0	0	0	0	0	0	0	0	NA	NA	NA	regulation of muscle contraction
1115	396433	ENSGALG00000000302	0	0	0	0	0	0	0	0	0	0	0	0	0	0	0	0	0	0	NA	NA	NA	troponin complex
1116	396433	ENSGALG00000000302	0	0	0	0	0	0	0	0	0	0	0	0	0	0	0	0	0	0	NA	NA	NA	skeletal muscle contraction
1117	396433	ENSGALG00000000302	0	0	0	0	0	0	0	0	0	0	0	0	0	0	0	0	0	0	NA	NA	NA	tropomyosin binding
1118	396433	ENSGALG00000000302	0	0	0	0	0	0	0	0	0	0	0	0	0	0	0	0	0	0	NA	NA	NA	muscle contraction
1119	396433	ENSGALG00000000302	0	0	0	0	0	0	0	0	0	0	0	0	0	0	0	0	0	0	NA	NA	NA	sarcomere organization
1120	396433	ENSGALG00000000302	0	0	0	0	0	0	0	0	0	0	0	0	0	0	0	0	0	0	NA	NA	NA	cardiac muscle contraction
1121	396433	ENSGALG00000000302	0	0	0	0	0	0	0	0	0	0	0	0	0	0	0	0	0	0	NA	NA	NA	calcium-dependent ATPase activity
1122	396433	ENSGALG00000000302	0	0	0	0	0	0	0	0	0	0	0	0	0	0	0	0	0	0	NA	NA	NA	troponin C binding
1123	396433	ENSGALG00000000302	0	0	0	0	0	0	0	0	0	0	0	0	0	0	0	0	0	0	NA	NA	NA	troponin I binding
1124	396433	ENSGALG00000000302	0	0	0	0	0	0	0	0	0	0	0	0	0	0	0	0	0	0	NA	NA	NA	actin binding
1125	396433	ENSGALG00000000302	0	0	0	0	0	0	0	0	0	0	0	0	0	0	0	0	0	0	NA	NA	NA	regulation of heart contraction
1126	396433	ENSGALG00000000302	0	0	0	0	0	0	0	0	0	0	0	0	0	0	0	0	0	0	NA	NA	NA	muscle filament sliding
1127	396433	ENSGALG00000000302	0	0	0	0	0	0	0	0	0	0	0	0	0	0	0	0	0	0	NA	NA	NA	negative regulation of ATPase activity
1128	396433	ENSGALG00000000302	0	0	0	0	0	0	0	0	0	0	0	0	0	0	0	0	0	0	NA	NA	NA	positive regulation of ATPase activity
1129	396433	ENSGALG00000000302	0	0	0	0	0	0	0	0	0	0	0	0	0	0	0	0	0	0	NA	NA	NA	response to calcium ion
1130	396433	ENSGALG00000000302	0	0	0	0	0	0	0	0	0	0	0	0	0	0	0	0	0	0	NA	NA	NA	ventricular cardiac muscle tissue morphogenesis
1131	396433	ENSGALG00000000302	0	0	0	0	0	0	0	0	0	0	0	0	0	0	0	0	0	0	NA	NA	NA	striated muscle thin filament
1132	396433	ENSGALG00000000302	0	0	0	0	0	0	0	0	0	0	0	0	0	0	0	0	0	0	NA	NA	NA	cardiac myofibril
1133	396433	ENSGALG00000000302	0	0	0	0	0	0	0	0	0	0	0	0	0	0	0	0	0	0	NA	NA	NA	cardiac Troponin complex
1134	421160	ENSGALG00000000309	0	0	0	0	0	0	0	0	0	0	0	0	0	0	0	0	0	0	NA	NA	NA	structural molecule activity
1135	419527	ENSGALG00000000311	22	5	22	4	5	7	23	23	19	26	31	47	10	12	17	13	14	9	0.121162	0.796976	0.121162	cytoplasm
1136	419527	ENSGALG00000000311	22	5	22	4	5	7	23	23	19	26	31	47	10	12	17	13	14	9	0.121162	0.796976	0.121162	GTPase activator activity
1137	419527	ENSGALG00000000311	22	5	22	4	5	7	23	23	19	26	31	47	10	12	17	13	14	9	0.121162	0.796976	0.121162	positive regulation of GTPase activity
1138	419527	ENSGALG00000000311	22	5	22	4	5	7	23	23	19	26	31	47	10	12	17	13	14	9	0.121162	0.796976	0.121162	guanyl-nucleotide exchange factor activity
1139	419527	ENSGALG00000000311	22	5	22	4	5	7	23	23	19	26	31	47	10	12	17	13	14	9	0.121162	0.796976	0.121162	small GTPase mediated signal transduction
1140	419527	ENSGALG00000000311	22	5	22	4	5	7	23	23	19	26	31	47	10	12	17	13	14	9	0.121162	0.796976	0.121162	cell migration
1141	419527	ENSGALG00000000311	22	5	22	4	5	7	23	23	19	26	31	47	10	12	17	13	14	9	0.121162	0.796976	0.121162	positive regulation of epithelial cell migration
1142	419527	ENSGALG00000000311	22	5	22	4	5	7	23	23	19	26	31	47	10	12	17	13	14	9	0.121162	0.796976	0.121162	positive regulation of substrate adhesion-dependent cell spreading
1143	419527	ENSGALG00000000311	22	5	22	4	5	7	23	23	19	26	31	47	10	12	17	13	14	9	0.121162	0.796976	0.121162	negative regulation of vascular smooth muscle contraction
1144	419527	ENSGALG00000000311	22	5	22	4	5	7	23	23	19	26	31	47	10	12	17	13	14	9	0.121162	0.796976	0.121162	positive regulation of vascular associated smooth muscle cell migration
1145	419527	ENSGALG00000000311	22	5	22	4	5	7	23	23	19	26	31	47	10	12	17	13	14	9	0.121162	0.796976	0.121162	cytosol
1146	419527	ENSGALG00000000311	22	5	22	4	5	7	23	23	19	26	31	47	10	12	17	13	14	9	0.121162	0.796976	0.121162	plasma membrane
1147	419527	ENSGALG00000000311	22	5	22	4	5	7	23	23	19	26	31	47	10	12	17	13	14	9	0.121162	0.796976	0.121162	protein binding
1148	421161	ENSGALG00000000313	0	0	0	0	0	0	0	0	0	0	0	0	0	0	0	0	0	0	NA	NA	NA	troponin complex
1149	421161	ENSGALG00000000313	0	0	0	0	0	0	0	0	0	0	0	0	0	0	0	0	0	0	NA	NA	NA	skeletal muscle contraction
1150	421161	ENSGALG00000000313	0	0	0	0	0	0	0	0	0	0	0	0	0	0	0	0	0	0	NA	NA	NA	muscle contraction
1151	421161	ENSGALG00000000313	0	0	0	0	0	0	0	0	0	0	0	0	0	0	0	0	0	0	NA	NA	NA	transition between fast and slow fiber
1152	421161	ENSGALG00000000313	0	0	0	0	0	0	0	0	0	0	0	0	0	0	0	0	0	0	NA	NA	NA	ventricular cardiac muscle tissue morphogenesis
1153	421161	ENSGALG00000000313	0	0	0	0	0	0	0	0	0	0	0	0	0	0	0	0	0	0	NA	NA	NA	cardiac muscle contraction
1154	NA	ENSGALG00000000314	523	915	464	342	652	607	3671	5696	3885	1628	3530	3687	2823	2441	2871	2246	2446	1882	0.815912	0.992513	0.815912	axon development
1155	NA	ENSGALG00000000314	523	915	464	342	652	607	3671	5696	3885	1628	3530	3687	2823	2441	2871	2246	2446	1882	0.815912	0.992513	0.815912	neurofilament
1156	NA	ENSGALG00000000314	523	915	464	342	652	607	3671	5696	3885	1628	3530	3687	2823	2441	2871	2246	2446	1882	0.815912	0.992513	0.815912	intermediate filament
1157	NA	ENSGALG00000000314	523	915	464	342	652	607	3671	5696	3885	1628	3530	3687	2823	2441	2871	2246	2446	1882	0.815912	0.992513	0.815912	structural molecule activity
1158	NA	ENSGALG00000000314	523	915	464	342	652	607	3671	5696	3885	1628	3530	3687	2823	2441	2871	2246	2446	1882	0.815912	0.992513	0.815912	axon cytoplasm
1159	NA	ENSGALG00000000314	523	915	464	342	652	607	3671	5696	3885	1628	3530	3687	2823	2441	2871	2246	2446	1882	0.815912	0.992513	0.815912	structural constituent of cytoskeleton
1160	NA	ENSGALG00000000314	523	915	464	342	652	607	3671	5696	3885	1628	3530	3687	2823	2441	2871	2246	2446	1882	0.815912	0.992513	0.815912	protein C-terminus binding
1161	NA	ENSGALG00000000314	523	915	464	342	652	607	3671	5696	3885	1628	3530	3687	2823	2441	2871	2246	2446	1882	0.815912	0.992513	0.815912	protein-macromolecule adaptor activity
1162	NA	ENSGALG00000000314	523	915	464	342	652	607	3671	5696	3885	1628	3530	3687	2823	2441	2871	2246	2446	1882	0.815912	0.992513	0.815912	identical protein binding
1163	NA	ENSGALG00000000314	523	915	464	342	652	607	3671	5696	3885	1628	3530	3687	2823	2441	2871	2246	2446	1882	0.815912	0.992513	0.815912	structural constituent of postsynaptic intermediate filament cytoskeleton
1164	NA	ENSGALG00000000314	523	915	464	342	652	607	3671	5696	3885	1628	3530	3687	2823	2441	2871	2246	2446	1882	0.815912	0.992513	0.815912	microtubule cytoskeleton organization
1165	NA	ENSGALG00000000314	523	915	464	342	652	607	3671	5696	3885	1628	3530	3687	2823	2441	2871	2246	2446	1882	0.815912	0.992513	0.815912	anterograde axonal transport
1166	NA	ENSGALG00000000314	523	915	464	342	652	607	3671	5696	3885	1628	3530	3687	2823	2441	2871	2246	2446	1882	0.815912	0.992513	0.815912	retrograde axonal transport
1167	NA	ENSGALG00000000314	523	915	464	342	652	607	3671	5696	3885	1628	3530	3687	2823	2441	2871	2246	2446	1882	0.815912	0.992513	0.815912	peripheral nervous system axon regeneration
1168	NA	ENSGALG00000000314	523	915	464	342	652	607	3671	5696	3885	1628	3530	3687	2823	2441	2871	2246	2446	1882	0.815912	0.992513	0.815912	axonal transport of mitochondrion
1169	NA	ENSGALG00000000314	523	915	464	342	652	607	3671	5696	3885	1628	3530	3687	2823	2441	2871	2246	2446	1882	0.815912	0.992513	0.815912	regulation of axon diameter
1170	NA	ENSGALG00000000314	523	915	464	342	652	607	3671	5696	3885	1628	3530	3687	2823	2441	2871	2246	2446	1882	0.815912	0.992513	0.815912	neurofilament bundle assembly
1171	NA	ENSGALG00000000314	523	915	464	342	652	607	3671	5696	3885	1628	3530	3687	2823	2441	2871	2246	2446	1882	0.815912	0.992513	0.815912	locomotion
1172	NA	ENSGALG00000000314	523	915	464	342	652	607	3671	5696	3885	1628	3530	3687	2823	2441	2871	2246	2446	1882	0.815912	0.992513	0.815912	negative regulation of neuron apoptotic process
1173	NA	ENSGALG00000000314	523	915	464	342	652	607	3671	5696	3885	1628	3530	3687	2823	2441	2871	2246	2446	1882	0.815912	0.992513	0.815912	intermediate filament organization
1174	NA	ENSGALG00000000314	523	915	464	342	652	607	3671	5696	3885	1628	3530	3687	2823	2441	2871	2246	2446	1882	0.815912	0.992513	0.815912	intermediate filament bundle assembly
1175	NA	ENSGALG00000000314	523	915	464	342	652	607	3671	5696	3885	1628	3530	3687	2823	2441	2871	2246	2446	1882	0.815912	0.992513	0.815912	neuron projection morphogenesis
1176	NA	ENSGALG00000000314	523	915	464	342	652	607	3671	5696	3885	1628	3530	3687	2823	2441	2871	2246	2446	1882	0.815912	0.992513	0.815912	positive regulation of axonogenesis
1177	NA	ENSGALG00000000314	523	915	464	342	652	607	3671	5696	3885	1628	3530	3687	2823	2441	2871	2246	2446	1882	0.815912	0.992513	0.815912	neuromuscular process controlling balance
1178	NA	ENSGALG00000000314	523	915	464	342	652	607	3671	5696	3885	1628	3530	3687	2823	2441	2871	2246	2446	1882	0.815912	0.992513	0.815912	neurofilament cytoskeleton organization
1179	NA	ENSGALG00000000314	523	915	464	342	652	607	3671	5696	3885	1628	3530	3687	2823	2441	2871	2246	2446	1882	0.815912	0.992513	0.815912	postsynaptic intermediate filament cytoskeleton organization
1180	NA	ENSGALG00000000314	523	915	464	342	652	607	3671	5696	3885	1628	3530	3687	2823	2441	2871	2246	2446	1882	0.815912	0.992513	0.815912	cytoplasm
1181	NA	ENSGALG00000000314	523	915	464	342	652	607	3671	5696	3885	1628	3530	3687	2823	2441	2871	2246	2446	1882	0.815912	0.992513	0.815912	axon
1182	NA	ENSGALG00000000314	523	915	464	342	652	607	3671	5696	3885	1628	3530	3687	2823	2441	2871	2246	2446	1882	0.815912	0.992513	0.815912	neuromuscular junction
1183	NA	ENSGALG00000000314	523	915	464	342	652	607	3671	5696	3885	1628	3530	3687	2823	2441	2871	2246	2446	1882	0.815912	0.992513	0.815912	neuron projection
1184	NA	ENSGALG00000000314	523	915	464	342	652	607	3671	5696	3885	1628	3530	3687	2823	2441	2871	2246	2446	1882	0.815912	0.992513	0.815912	Schaffer collateral - CA1 synapse
1185	NA	ENSGALG00000000314	523	915	464	342	652	607	3671	5696	3885	1628	3530	3687	2823	2441	2871	2246	2446	1882	0.815912	0.992513	0.815912	presynaptic intermediate filament cytoskeleton
1186	396206	ENSGALG00000000317	0	3	0	0	3	1	1	7	42	7	10	36	12	1	8	2	8	7	0.969476	0.982955	0.969476	neurofilament
1187	396206	ENSGALG00000000317	0	3	0	0	3	1	1	7	42	7	10	36	12	1	8	2	8	7	0.969476	0.982955	0.969476	neurofilament bundle assembly
1188	396206	ENSGALG00000000317	0	3	0	0	3	1	1	7	42	7	10	36	12	1	8	2	8	7	0.969476	0.982955	0.969476	intermediate filament
1189	396206	ENSGALG00000000317	0	3	0	0	3	1	1	7	42	7	10	36	12	1	8	2	8	7	0.969476	0.982955	0.969476	cytoskeleton
1190	396206	ENSGALG00000000317	0	3	0	0	3	1	1	7	42	7	10	36	12	1	8	2	8	7	0.969476	0.982955	0.969476	structural molecule activity
1191	396206	ENSGALG00000000317	0	3	0	0	3	1	1	7	42	7	10	36	12	1	8	2	8	7	0.969476	0.982955	0.969476	axon
1192	396176	ENSGALG00000000318	67	20	64	47	19	17	6	72	13	36	47	115	5	19	25	5	7	9	0.450895	0.984846	0.450895	nucleus
1193	396176	ENSGALG00000000318	67	20	64	47	19	17	6	72	13	36	47	115	5	19	25	5	7	9	0.450895	0.984846	0.450895	cytoplasm
1194	396176	ENSGALG00000000318	67	20	64	47	19	17	6	72	13	36	47	115	5	19	25	5	7	9	0.450895	0.984846	0.450895	metal ion binding
1195	396176	ENSGALG00000000318	67	20	64	47	19	17	6	72	13	36	47	115	5	19	25	5	7	9	0.450895	0.984846	0.450895	cytoskeleton
1196	396176	ENSGALG00000000318	67	20	64	47	19	17	6	72	13	36	47	115	5	19	25	5	7	9	0.450895	0.984846	0.450895	actin cytoskeleton organization
1197	396176	ENSGALG00000000318	67	20	64	47	19	17	6	72	13	36	47	115	5	19	25	5	7	9	0.450895	0.984846	0.450895	Z disc
1198	396176	ENSGALG00000000318	67	20	64	47	19	17	6	72	13	36	47	115	5	19	25	5	7	9	0.450895	0.984846	0.450895	phosphoprotein binding
1199	396176	ENSGALG00000000318	67	20	64	47	19	17	6	72	13	36	47	115	5	19	25	5	7	9	0.450895	0.984846	0.450895	structural constituent of muscle
1200	396176	ENSGALG00000000318	67	20	64	47	19	17	6	72	13	36	47	115	5	19	25	5	7	9	0.450895	0.984846	0.450895	sarcomere organization
1201	396176	ENSGALG00000000318	67	20	64	47	19	17	6	72	13	36	47	115	5	19	25	5	7	9	0.450895	0.984846	0.450895	focal adhesion
1202	396176	ENSGALG00000000318	67	20	64	47	19	17	6	72	13	36	47	115	5	19	25	5	7	9	0.450895	0.984846	0.450895	stress fiber
1203	396176	ENSGALG00000000318	67	20	64	47	19	17	6	72	13	36	47	115	5	19	25	5	7	9	0.450895	0.984846	0.450895	actinin binding
1204	396176	ENSGALG00000000318	67	20	64	47	19	17	6	72	13	36	47	115	5	19	25	5	7	9	0.450895	0.984846	0.450895	muscle tissue development
1205	396176	ENSGALG00000000318	67	20	64	47	19	17	6	72	13	36	47	115	5	19	25	5	7	9	0.450895	0.984846	0.450895	alpha-actinin binding
1206	396176	ENSGALG00000000318	67	20	64	47	19	17	6	72	13	36	47	115	5	19	25	5	7	9	0.450895	0.984846	0.450895	cell leading edge
1207	419803	ENSGALG00000000329	5426	6683	7310	7926	6145	8240	7796	9685	11907	8861	7877	11202	7565	12037	9021	7885	8706	12498	0.789666	0.963102	0.789666	cytosol
1208	419803	ENSGALG00000000329	5426	6683	7310	7926	6145	8240	7796	9685	11907	8861	7877	11202	7565	12037	9021	7885	8706	12498	0.789666	0.963102	0.789666	one-carbon metabolic process
1209	419803	ENSGALG00000000329	5426	6683	7310	7926	6145	8240	7796	9685	11907	8861	7877	11202	7565	12037	9021	7885	8706	12498	0.789666	0.963102	0.789666	S-adenosylmethionine cycle
1210	419803	ENSGALG00000000329	5426	6683	7310	7926	6145	8240	7796	9685	11907	8861	7877	11202	7565	12037	9021	7885	8706	12498	0.789666	0.963102	0.789666	identical protein binding
1211	419803	ENSGALG00000000329	5426	6683	7310	7926	6145	8240	7796	9685	11907	8861	7877	11202	7565	12037	9021	7885	8706	12498	0.789666	0.963102	0.789666	mRNA polyadenylation
1212	419803	ENSGALG00000000329	5426	6683	7310	7926	6145	8240	7796	9685	11907	8861	7877	11202	7565	12037	9021	7885	8706	12498	0.789666	0.963102	0.789666	protein export from nucleus
1213	419803	ENSGALG00000000329	5426	6683	7310	7926	6145	8240	7796	9685	11907	8861	7877	11202	7565	12037	9021	7885	8706	12498	0.789666	0.963102	0.789666	positive regulation of sodium ion transport
1214	419803	ENSGALG00000000329	5426	6683	7310	7926	6145	8240	7796	9685	11907	8861	7877	11202	7565	12037	9021	7885	8706	12498	0.789666	0.963102	0.789666	regulation of mRNA 3'-end processing
1215	419803	ENSGALG00000000329	5426	6683	7310	7926	6145	8240	7796	9685	11907	8861	7877	11202	7565	12037	9021	7885	8706	12498	0.789666	0.963102	0.789666	regulation of ion transmembrane transporter activity
1216	419803	ENSGALG00000000329	5426	6683	7310	7926	6145	8240	7796	9685	11907	8861	7877	11202	7565	12037	9021	7885	8706	12498	0.789666	0.963102	0.789666	angiotensin-activated signaling pathway
1217	419803	ENSGALG00000000329	5426	6683	7310	7926	6145	8240	7796	9685	11907	8861	7877	11202	7565	12037	9021	7885	8706	12498	0.789666	0.963102	0.789666	epithelial fluid transport
1218	419803	ENSGALG00000000329	5426	6683	7310	7926	6145	8240	7796	9685	11907	8861	7877	11202	7565	12037	9021	7885	8706	12498	0.789666	0.963102	0.789666	regulation of anion transport
1219	419803	ENSGALG00000000329	5426	6683	7310	7926	6145	8240	7796	9685	11907	8861	7877	11202	7565	12037	9021	7885	8706	12498	0.789666	0.963102	0.789666	response to calcium ion
1220	419803	ENSGALG00000000329	5426	6683	7310	7926	6145	8240	7796	9685	11907	8861	7877	11202	7565	12037	9021	7885	8706	12498	0.789666	0.963102	0.789666	intracellular membrane-bounded organelle
1221	419803	ENSGALG00000000329	5426	6683	7310	7926	6145	8240	7796	9685	11907	8861	7877	11202	7565	12037	9021	7885	8706	12498	0.789666	0.963102	0.789666	adenosylhomocysteinase activity
1222	419803	ENSGALG00000000329	5426	6683	7310	7926	6145	8240	7796	9685	11907	8861	7877	11202	7565	12037	9021	7885	8706	12498	0.789666	0.963102	0.789666	apoptotic process
1223	419803	ENSGALG00000000329	5426	6683	7310	7926	6145	8240	7796	9685	11907	8861	7877	11202	7565	12037	9021	7885	8706	12498	0.789666	0.963102	0.789666	mitochondrion-endoplasmic reticulum membrane tethering
1224	419803	ENSGALG00000000329	5426	6683	7310	7926	6145	8240	7796	9685	11907	8861	7877	11202	7565	12037	9021	7885	8706	12498	0.789666	0.963102	0.789666	mitochondria-associated endoplasmic reticulum membrane
1225	NA	ENSGALG00000000336	22	7	39	5	7	5	1	6	3	12	2	10	3	3	0	1	2	1	0.218974	0.943409	0.218974	protein kinase binding
1226	NA	ENSGALG00000000336	22	7	39	5	7	5	1	6	3	12	2	10	3	3	0	1	2	1	0.218974	0.943409	0.218974	signal transduction
1227	NA	ENSGALG00000000336	22	7	39	5	7	5	1	6	3	12	2	10	3	3	0	1	2	1	0.218974	0.943409	0.218974	cytoplasm
1228	NA	ENSGALG00000000336	22	7	39	5	7	5	1	6	3	12	2	10	3	3	0	1	2	1	0.218974	0.943409	0.218974	phosphatase regulator activity
1229	NA	ENSGALG00000000336	22	7	39	5	7	5	1	6	3	12	2	10	3	3	0	1	2	1	0.218974	0.943409	0.218974	regulation of catalytic activity
1230	NA	ENSGALG00000000336	22	7	39	5	7	5	1	6	3	12	2	10	3	3	0	1	2	1	0.218974	0.943409	0.218974	protein binding
1231	NA	ENSGALG00000000336	22	7	39	5	7	5	1	6	3	12	2	10	3	3	0	1	2	1	0.218974	0.943409	0.218974	negative regulation of catalytic activity
1232	NA	ENSGALG00000000336	22	7	39	5	7	5	1	6	3	12	2	10	3	3	0	1	2	1	0.218974	0.943409	0.218974	Z disc
1233	NA	ENSGALG00000000336	22	7	39	5	7	5	1	6	3	12	2	10	3	3	0	1	2	1	0.218974	0.943409	0.218974	enzyme inhibitor activity
1234	NA	ENSGALG00000000336	22	7	39	5	7	5	1	6	3	12	2	10	3	3	0	1	2	1	0.218974	0.943409	0.218974	A band
1235	NA	ENSGALG00000000337	0	0	0	0	0	0	0	0	0	0	0	0	0	0	0	0	0	0	NA	NA	NA	membrane
1236	NA	ENSGALG00000000337	0	0	0	0	0	0	0	0	0	0	0	0	0	0	0	0	0	0	NA	NA	NA	integral component of membrane
1237	425968	ENSGALG00000000341	0	0	0	0	0	0	0	0	0	0	0	0	0	0	0	0	0	0	NA	NA	NA
1238	428274	ENSGALG00000000349	1144	1423	1391	1307	1287	1761	1924	1277	1852	1311	1574	1584	1227	1567	1562	1395	1480	1577	0.650268	0.977502	0.650268	nucleotide binding
1239	428274	ENSGALG00000000349	1144	1423	1391	1307	1287	1761	1924	1277	1852	1311	1574	1584	1227	1567	1562	1395	1480	1577	0.650268	0.977502	0.650268	ATP binding
1240	428274	ENSGALG00000000349	1144	1423	1391	1307	1287	1761	1924	1277	1852	1311	1574	1584	1227	1567	1562	1395	1480	1577	0.650268	0.977502	0.650268	cytoplasm
1241	428274	ENSGALG00000000349	1144	1423	1391	1307	1287	1761	1924	1277	1852	1311	1574	1584	1227	1567	1562	1395	1480	1577	0.650268	0.977502	0.650268	hydrolase activity
1242	428274	ENSGALG00000000349	1144	1423	1391	1307	1287	1761	1924	1277	1852	1311	1574	1584	1227	1567	1562	1395	1480	1577	0.650268	0.977502	0.650268	protein catabolic process
1243	428274	ENSGALG00000000349	1144	1423	1391	1307	1287	1761	1924	1277	1852	1311	1574	1584	1227	1567	1562	1395	1480	1577	0.650268	0.977502	0.650268	proteasome complex
1244	428274	ENSGALG00000000349	1144	1423	1391	1307	1287	1761	1924	1277	1852	1311	1574	1584	1227	1567	1562	1395	1480	1577	0.650268	0.977502	0.650268	modulation of chemical synaptic transmission
1245	428274	ENSGALG00000000349	1144	1423	1391	1307	1287	1761	1924	1277	1852	1311	1574	1584	1227	1567	1562	1395	1480	1577	0.650268	0.977502	0.650268	cytosolic proteasome complex
1246	428274	ENSGALG00000000349	1144	1423	1391	1307	1287	1761	1924	1277	1852	1311	1574	1584	1227	1567	1562	1395	1480	1577	0.650268	0.977502	0.650268	postsynapse
1247	428274	ENSGALG00000000349	1144	1423	1391	1307	1287	1761	1924	1277	1852	1311	1574	1584	1227	1567	1562	1395	1480	1577	0.650268	0.977502	0.650268	signaling receptor binding
1248	428274	ENSGALG00000000349	1144	1423	1391	1307	1287	1761	1924	1277	1852	1311	1574	1584	1227	1567	1562	1395	1480	1577	0.650268	0.977502	0.650268	transcription factor binding
1249	428274	ENSGALG00000000349	1144	1423	1391	1307	1287	1761	1924	1277	1852	1311	1574	1584	1227	1567	1562	1395	1480	1577	0.650268	0.977502	0.650268	thyrotropin-releasing hormone receptor binding
1250	428274	ENSGALG00000000349	1144	1423	1391	1307	1287	1761	1924	1277	1852	1311	1574	1584	1227	1567	1562	1395	1480	1577	0.650268	0.977502	0.650268	regulation of transcription by RNA polymerase II
1251	428274	ENSGALG00000000349	1144	1423	1391	1307	1287	1761	1924	1277	1852	1311	1574	1584	1227	1567	1562	1395	1480	1577	0.650268	0.977502	0.650268	proteasome-mediated ubiquitin-dependent protein catabolic process
1252	428274	ENSGALG00000000349	1144	1423	1391	1307	1287	1761	1924	1277	1852	1311	1574	1584	1227	1567	1562	1395	1480	1577	0.650268	0.977502	0.650268	negative regulation of transcription, DNA-templated
1253	428274	ENSGALG00000000349	1144	1423	1391	1307	1287	1761	1924	1277	1852	1311	1574	1584	1227	1567	1562	1395	1480	1577	0.650268	0.977502	0.650268	nucleus
1254	428274	ENSGALG00000000349	1144	1423	1391	1307	1287	1761	1924	1277	1852	1311	1574	1584	1227	1567	1562	1395	1480	1577	0.650268	0.977502	0.650268	proteasome regulatory particle
1255	428274	ENSGALG00000000349	1144	1423	1391	1307	1287	1761	1924	1277	1852	1311	1574	1584	1227	1567	1562	1395	1480	1577	0.650268	0.977502	0.650268	proteasome accessory complex
1256	428274	ENSGALG00000000349	1144	1423	1391	1307	1287	1761	1924	1277	1852	1311	1574	1584	1227	1567	1562	1395	1480	1577	0.650268	0.977502	0.650268	cytoplasmic vesicle
1257	428274	ENSGALG00000000349	1144	1423	1391	1307	1287	1761	1924	1277	1852	1311	1574	1584	1227	1567	1562	1395	1480	1577	0.650268	0.977502	0.650268	TBP-class protein binding
1258	428274	ENSGALG00000000349	1144	1423	1391	1307	1287	1761	1924	1277	1852	1311	1574	1584	1227	1567	1562	1395	1480	1577	0.650268	0.977502	0.650268	proteasome regulatory particle, base subcomplex
1259	428274	ENSGALG00000000349	1144	1423	1391	1307	1287	1761	1924	1277	1852	1311	1574	1584	1227	1567	1562	1395	1480	1577	0.650268	0.977502	0.650268	nuclear proteasome complex
1260	428274	ENSGALG00000000349	1144	1423	1391	1307	1287	1761	1924	1277	1852	1311	1574	1584	1227	1567	1562	1395	1480	1577	0.650268	0.977502	0.650268	positive regulation of RNA polymerase II transcriptional preinitiation complex assembly
1261	420053	ENSGALG00000000352	1515	1680	1554	1585	1464	1485	1345	1215	1471	1238	1375	1170	1488	1324	1452	1504	1351	1350	0.960992	0.984846	0.960992	membrane
1262	420053	ENSGALG00000000352	1515	1680	1554	1585	1464	1485	1345	1215	1471	1238	1375	1170	1488	1324	1452	1504	1351	1350	0.960992	0.984846	0.960992	mitochondrion
1263	420053	ENSGALG00000000352	1515	1680	1554	1585	1464	1485	1345	1215	1471	1238	1375	1170	1488	1324	1452	1504	1351	1350	0.960992	0.984846	0.960992	mitochondrial inner membrane
1264	420053	ENSGALG00000000352	1515	1680	1554	1585	1464	1485	1345	1215	1471	1238	1375	1170	1488	1324	1452	1504	1351	1350	0.960992	0.984846	0.960992	protein transport
1265	420053	ENSGALG00000000352	1515	1680	1554	1585	1464	1485	1345	1215	1471	1238	1375	1170	1488	1324	1452	1504	1351	1350	0.960992	0.984846	0.960992	chaperone binding
1266	420053	ENSGALG00000000352	1515	1680	1554	1585	1464	1485	1345	1215	1471	1238	1375	1170	1488	1324	1452	1504	1351	1350	0.960992	0.984846	0.960992	protein import into mitochondrial matrix
1267	420053	ENSGALG00000000352	1515	1680	1554	1585	1464	1485	1345	1215	1471	1238	1375	1170	1488	1324	1452	1504	1351	1350	0.960992	0.984846	0.960992	mitochondrial matrix
1268	419529	ENSGALG00000000357	10	7	7	17	21	10	4	1	2	10	1	2	1	7	6	5	5	10	0.98846	0.979577	0.98846	proteolysis
1269	419529	ENSGALG00000000357	10	7	7	17	21	10	4	1	2	10	1	2	1	7	6	5	5	10	0.98846	0.979577	0.98846	metalloendopeptidase activity
1270	419529	ENSGALG00000000357	10	7	7	17	21	10	4	1	2	10	1	2	1	7	6	5	5	10	0.98846	0.979577	0.98846	metallopeptidase activity
1271	428201	ENSGALG00000000364	0	0	0	0	0	0	0	1	1	0	0	1	0	0	0	1	0	0	NA	NA	NA	extracellular space
1272	428201	ENSGALG00000000364	0	0	0	0	0	0	0	1	1	0	0	1	0	0	0	1	0	0	NA	NA	NA	hormone activity
1273	428201	ENSGALG00000000364	0	0	0	0	0	0	0	1	1	0	0	1	0	0	0	1	0	0	NA	NA	NA	signal transduction
1274	428201	ENSGALG00000000364	0	0	0	0	0	0	0	1	1	0	0	1	0	0	0	1	0	0	NA	NA	NA	extracellular region
1275	428201	ENSGALG00000000364	0	0	0	0	0	0	0	1	1	0	0	1	0	0	0	1	0	0	NA	NA	NA	cellular calcium ion homeostasis
1276	428201	ENSGALG00000000364	0	0	0	0	0	0	0	1	1	0	0	1	0	0	0	1	0	0	NA	NA	NA	endothelial cell morphogenesis
1277	428201	ENSGALG00000000364	0	0	0	0	0	0	0	1	1	0	0	1	0	0	0	1	0	0	NA	NA	NA	growth plate cartilage axis specification
1278	428201	ENSGALG00000000364	0	0	0	0	0	0	0	1	1	0	0	1	0	0	0	1	0	0	NA	NA	NA	negative regulation of endothelial cell migration
1279	428201	ENSGALG00000000364	0	0	0	0	0	0	0	1	1	0	0	1	0	0	0	1	0	0	NA	NA	NA	negative regulation of cell migration
1280	428201	ENSGALG00000000364	0	0	0	0	0	0	0	1	1	0	0	1	0	0	0	1	0	0	NA	NA	NA	chondrocyte proliferation
1281	428201	ENSGALG00000000364	0	0	0	0	0	0	0	1	1	0	0	1	0	0	0	1	0	0	NA	NA	NA	regulation of anion transport
1282	428201	ENSGALG00000000364	0	0	0	0	0	0	0	1	1	0	0	1	0	0	0	1	0	0	NA	NA	NA	negative regulation of calcium ion transport
1283	428201	ENSGALG00000000364	0	0	0	0	0	0	0	1	1	0	0	1	0	0	0	1	0	0	NA	NA	NA	bone development
1284	428201	ENSGALG00000000364	0	0	0	0	0	0	0	1	1	0	0	1	0	0	0	1	0	0	NA	NA	NA	regulation of cardiac muscle cell contraction
1285	428201	ENSGALG00000000364	0	0	0	0	0	0	0	1	1	0	0	1	0	0	0	1	0	0	NA	NA	NA	positive regulation of calcium ion import
1286	428201	ENSGALG00000000364	0	0	0	0	0	0	0	1	1	0	0	1	0	0	0	1	0	0	NA	NA	NA	negative regulation of renal phosphate excretion
1287	428201	ENSGALG00000000364	0	0	0	0	0	0	0	1	1	0	0	1	0	0	0	1	0	0	NA	NA	NA	nucleus
1288	428201	ENSGALG00000000364	0	0	0	0	0	0	0	1	1	0	0	1	0	0	0	1	0	0	NA	NA	NA	cytoplasm
1289	396037	ENSGALG00000000365	0	0	1	0	0	1	5	3	2	0	0	1	1	0	2	0	0	0	NA	NA	NA	nucleus
1290	396037	ENSGALG00000000365	0	0	1	0	0	1	5	3	2	0	0	1	1	0	2	0	0	0	NA	NA	NA	DNA binding
1291	396037	ENSGALG00000000365	0	0	1	0	0	1	5	3	2	0	0	1	1	0	2	0	0	0	NA	NA	NA	RNA polymerase II cis-regulatory region sequence-specific DNA binding
1292	396037	ENSGALG00000000365	0	0	1	0	0	1	5	3	2	0	0	1	1	0	2	0	0	0	NA	NA	NA	regulation of transcription, DNA-templated
1293	396037	ENSGALG00000000365	0	0	1	0	0	1	5	3	2	0	0	1	1	0	2	0	0	0	NA	NA	NA	DNA-binding transcription factor activity
1294	396037	ENSGALG00000000365	0	0	1	0	0	1	5	3	2	0	0	1	1	0	2	0	0	0	NA	NA	NA	positive regulation of transcription by RNA polymerase II
1295	396037	ENSGALG00000000365	0	0	1	0	0	1	5	3	2	0	0	1	1	0	2	0	0	0	NA	NA	NA	cell differentiation
1296	396037	ENSGALG00000000365	0	0	1	0	0	1	5	3	2	0	0	1	1	0	2	0	0	0	NA	NA	NA	sequence-specific DNA binding
1297	396037	ENSGALG00000000365	0	0	1	0	0	1	5	3	2	0	0	1	1	0	2	0	0	0	NA	NA	NA	DNA-binding transcription factor activity, RNA polymerase II-specific
1298	419945	ENSGALG00000000367	0	0	0	0	0	0	0	0	0	0	0	0	0	0	0	0	0	0	NA	NA	NA	membrane
1299	419945	ENSGALG00000000367	0	0	0	0	0	0	0	0	0	0	0	0	0	0	0	0	0	0	NA	NA	NA	integral component of membrane
1300	419945	ENSGALG00000000367	0	0	0	0	0	0	0	0	0	0	0	0	0	0	0	0	0	0	NA	NA	NA	plasma membrane
1301	419945	ENSGALG00000000367	0	0	0	0	0	0	0	0	0	0	0	0	0	0	0	0	0	0	NA	NA	NA	cation transmembrane transport
1302	419945	ENSGALG00000000367	0	0	0	0	0	0	0	0	0	0	0	0	0	0	0	0	0	0	NA	NA	NA	sodium ion transport
1303	419945	ENSGALG00000000367	0	0	0	0	0	0	0	0	0	0	0	0	0	0	0	0	0	0	NA	NA	NA	sodium channel activity
1304	419945	ENSGALG00000000367	0	0	0	0	0	0	0	0	0	0	0	0	0	0	0	0	0	0	NA	NA	NA	ligand-gated sodium channel activity
1305	419945	ENSGALG00000000367	0	0	0	0	0	0	0	0	0	0	0	0	0	0	0	0	0	0	NA	NA	NA	sodium ion transmembrane transport
1306	419945	ENSGALG00000000367	0	0	0	0	0	0	0	0	0	0	0	0	0	0	0	0	0	0	NA	NA	NA	ion channel activity
1307	419945	ENSGALG00000000367	0	0	0	0	0	0	0	0	0	0	0	0	0	0	0	0	0	0	NA	NA	NA	cation channel activity
1308	419945	ENSGALG00000000367	0	0	0	0	0	0	0	0	0	0	0	0	0	0	0	0	0	0	NA	NA	NA	ion gated channel activity
1309	419945	ENSGALG00000000367	0	0	0	0	0	0	0	0	0	0	0	0	0	0	0	0	0	0	NA	NA	NA	regulation of systemic arterial blood pressure by aortic arch baroreceptor feedback
1310	419945	ENSGALG00000000367	0	0	0	0	0	0	0	0	0	0	0	0	0	0	0	0	0	0	NA	NA	NA	cation transport
1311	419945	ENSGALG00000000367	0	0	0	0	0	0	0	0	0	0	0	0	0	0	0	0	0	0	NA	NA	NA	phototransduction
1312	419945	ENSGALG00000000367	0	0	0	0	0	0	0	0	0	0	0	0	0	0	0	0	0	0	NA	NA	NA	sensory perception of sound
1313	419945	ENSGALG00000000367	0	0	0	0	0	0	0	0	0	0	0	0	0	0	0	0	0	0	NA	NA	NA	response to mechanical stimulus
1314	419945	ENSGALG00000000367	0	0	0	0	0	0	0	0	0	0	0	0	0	0	0	0	0	0	NA	NA	NA	response to acidic pH
1315	419945	ENSGALG00000000367	0	0	0	0	0	0	0	0	0	0	0	0	0	0	0	0	0	0	NA	NA	NA	regulation of vasoconstriction
1316	419945	ENSGALG00000000367	0	0	0	0	0	0	0	0	0	0	0	0	0	0	0	0	0	0	NA	NA	NA	ion transmembrane transport
1317	419945	ENSGALG00000000367	0	0	0	0	0	0	0	0	0	0	0	0	0	0	0	0	0	0	NA	NA	NA	regulation of ion transmembrane transport
1318	419945	ENSGALG00000000367	0	0	0	0	0	0	0	0	0	0	0	0	0	0	0	0	0	0	NA	NA	NA	protein localization to synapse
1319	419945	ENSGALG00000000367	0	0	0	0	0	0	0	0	0	0	0	0	0	0	0	0	0	0	NA	NA	NA	regulation of membrane potential
1320	419945	ENSGALG00000000367	0	0	0	0	0	0	0	0	0	0	0	0	0	0	0	0	0	0	NA	NA	NA	negative regulation of apoptotic process
1321	419945	ENSGALG00000000367	0	0	0	0	0	0	0	0	0	0	0	0	0	0	0	0	0	0	NA	NA	NA	sensory perception of sour taste
1322	419945	ENSGALG00000000367	0	0	0	0	0	0	0	0	0	0	0	0	0	0	0	0	0	0	NA	NA	NA	detection of mechanical stimulus involved in sensory perception
1323	419945	ENSGALG00000000367	0	0	0	0	0	0	0	0	0	0	0	0	0	0	0	0	0	0	NA	NA	NA	positive regulation of synapse assembly
1324	419945	ENSGALG00000000367	0	0	0	0	0	0	0	0	0	0	0	0	0	0	0	0	0	0	NA	NA	NA	integral component of plasma membrane
1325	419945	ENSGALG00000000367	0	0	0	0	0	0	0	0	0	0	0	0	0	0	0	0	0	0	NA	NA	NA	neuron projection
1326	419945	ENSGALG00000000367	0	0	0	0	0	0	0	0	0	0	0	0	0	0	0	0	0	0	NA	NA	NA	neuronal cell body
1327	419945	ENSGALG00000000367	0	0	0	0	0	0	0	0	0	0	0	0	0	0	0	0	0	0	NA	NA	NA	dendritic spine
1328	419945	ENSGALG00000000367	0	0	0	0	0	0	0	0	0	0	0	0	0	0	0	0	0	0	NA	NA	NA	synapse
1329	374218	ENSGALG00000000371	0	0	0	0	0	0	0	0	0	0	0	0	0	0	0	0	0	0	NA	NA	NA	membrane
1330	374218	ENSGALG00000000371	0	0	0	0	0	0	0	0	0	0	0	0	0	0	0	0	0	0	NA	NA	NA	integral component of membrane
1331	374218	ENSGALG00000000371	0	0	0	0	0	0	0	0	0	0	0	0	0	0	0	0	0	0	NA	NA	NA	G protein-coupled receptor activity
1332	374218	ENSGALG00000000371	0	0	0	0	0	0	0	0	0	0	0	0	0	0	0	0	0	0	NA	NA	NA	G protein-coupled receptor signaling pathway
1333	374218	ENSGALG00000000371	0	0	0	0	0	0	0	0	0	0	0	0	0	0	0	0	0	0	NA	NA	NA	plasma membrane
1334	374218	ENSGALG00000000371	0	0	0	0	0	0	0	0	0	0	0	0	0	0	0	0	0	0	NA	NA	NA	G protein-coupled peptide receptor activity
1335	374218	ENSGALG00000000371	0	0	0	0	0	0	0	0	0	0	0	0	0	0	0	0	0	0	NA	NA	NA	adenylate cyclase-activating G protein-coupled receptor signaling pathway
1336	374218	ENSGALG00000000371	0	0	0	0	0	0	0	0	0	0	0	0	0	0	0	0	0	0	NA	NA	NA	neuron projection
1337	374218	ENSGALG00000000371	0	0	0	0	0	0	0	0	0	0	0	0	0	0	0	0	0	0	NA	NA	NA	transmembrane signaling receptor activity
1338	374218	ENSGALG00000000371	0	0	0	0	0	0	0	0	0	0	0	0	0	0	0	0	0	0	NA	NA	NA	cell surface receptor signaling pathway
1339	374218	ENSGALG00000000371	0	0	0	0	0	0	0	0	0	0	0	0	0	0	0	0	0	0	NA	NA	NA	peptide hormone binding
1340	374218	ENSGALG00000000371	0	0	0	0	0	0	0	0	0	0	0	0	0	0	0	0	0	0	NA	NA	NA	adenylate cyclase-modulating G protein-coupled receptor signaling pathway
1341	374218	ENSGALG00000000371	0	0	0	0	0	0	0	0	0	0	0	0	0	0	0	0	0	0	NA	NA	NA	corticotropin-releasing hormone binding
1342	374218	ENSGALG00000000371	0	0	0	0	0	0	0	0	0	0	0	0	0	0	0	0	0	0	NA	NA	NA	corticotrophin-releasing factor receptor activity
1343	374218	ENSGALG00000000371	0	0	0	0	0	0	0	0	0	0	0	0	0	0	0	0	0	0	NA	NA	NA	corticotropin-releasing hormone receptor activity
1344	374218	ENSGALG00000000371	0	0	0	0	0	0	0	0	0	0	0	0	0	0	0	0	0	0	NA	NA	NA	hormone-mediated signaling pathway
1345	374218	ENSGALG00000000371	0	0	0	0	0	0	0	0	0	0	0	0	0	0	0	0	0	0	NA	NA	NA	adrenal gland development
1346	374218	ENSGALG00000000371	0	0	0	0	0	0	0	0	0	0	0	0	0	0	0	0	0	0	NA	NA	NA	fear response
1347	374218	ENSGALG00000000371	0	0	0	0	0	0	0	0	0	0	0	0	0	0	0	0	0	0	NA	NA	NA	behavioral response to ethanol
1348	374218	ENSGALG00000000371	0	0	0	0	0	0	0	0	0	0	0	0	0	0	0	0	0	0	NA	NA	NA	corticotropin secretion
1349	374218	ENSGALG00000000371	0	0	0	0	0	0	0	0	0	0	0	0	0	0	0	0	0	0	NA	NA	NA	general adaptation syndrome, behavioral process
1350	374218	ENSGALG00000000371	0	0	0	0	0	0	0	0	0	0	0	0	0	0	0	0	0	0	NA	NA	NA	cellular response to corticotropin-releasing hormone stimulus
1351	374218	ENSGALG00000000371	0	0	0	0	0	0	0	0	0	0	0	0	0	0	0	0	0	0	NA	NA	NA	regulation of corticosterone secretion
1352	421165	ENSGALG00000000374	8	0	13	7	3	2	0	0	0	10	1	11	0	1	0	2	0	1	0.187581	NA	0.187581	plasma membrane
1353	421165	ENSGALG00000000374	8	0	13	7	3	2	0	0	0	10	1	11	0	1	0	2	0	1	0.187581	NA	0.187581	metal ion binding
1354	421165	ENSGALG00000000374	8	0	13	7	3	2	0	0	0	10	1	11	0	1	0	2	0	1	0.187581	NA	0.187581	hydrolase activity
1355	421165	ENSGALG00000000374	8	0	13	7	3	2	0	0	0	10	1	11	0	1	0	2	0	1	0.187581	NA	0.187581	peptidase activity
1356	421165	ENSGALG00000000374	8	0	13	7	3	2	0	0	0	10	1	11	0	1	0	2	0	1	0.187581	NA	0.187581	proteolysis
1357	421165	ENSGALG00000000374	8	0	13	7	3	2	0	0	0	10	1	11	0	1	0	2	0	1	0.187581	NA	0.187581	extracellular space
1358	421165	ENSGALG00000000374	8	0	13	7	3	2	0	0	0	10	1	11	0	1	0	2	0	1	0.187581	NA	0.187581	extracellular region
1359	421165	ENSGALG00000000374	8	0	13	7	3	2	0	0	0	10	1	11	0	1	0	2	0	1	0.187581	NA	0.187581	zinc ion binding
1360	421165	ENSGALG00000000374	8	0	13	7	3	2	0	0	0	10	1	11	0	1	0	2	0	1	0.187581	NA	0.187581	metallopeptidase activity
1361	421165	ENSGALG00000000374	8	0	13	7	3	2	0	0	0	10	1	11	0	1	0	2	0	1	0.187581	NA	0.187581	secretory granule
1362	421165	ENSGALG00000000374	8	0	13	7	3	2	0	0	0	10	1	11	0	1	0	2	0	1	0.187581	NA	0.187581	aminopeptidase activity
1363	421165	ENSGALG00000000374	8	0	13	7	3	2	0	0	0	10	1	11	0	1	0	2	0	1	0.187581	NA	0.187581	negative regulation of blood pressure
1364	419530	ENSGALG00000000378	6560	7344	5315	11948	10058	5865	28473	15957	16281	10466	15794	14124	23228	11569	13647	8547	9021	11903	0.160449	0.315906	0.160449	ATP transmembrane transporter activity
1365	419530	ENSGALG00000000378	6560	7344	5315	11948	10058	5865	28473	15957	16281	10466	15794	14124	23228	11569	13647	8547	9021	11903	0.160449	0.315906	0.160449	membrane
1366	419530	ENSGALG00000000378	6560	7344	5315	11948	10058	5865	28473	15957	16281	10466	15794	14124	23228	11569	13647	8547	9021	11903	0.160449	0.315906	0.160449	integral component of membrane
1367	419530	ENSGALG00000000378	6560	7344	5315	11948	10058	5865	28473	15957	16281	10466	15794	14124	23228	11569	13647	8547	9021	11903	0.160449	0.315906	0.160449	transmembrane transport
1368	419530	ENSGALG00000000378	6560	7344	5315	11948	10058	5865	28473	15957	16281	10466	15794	14124	23228	11569	13647	8547	9021	11903	0.160449	0.315906	0.160449	iron ion transmembrane transporter activity
1369	419530	ENSGALG00000000378	6560	7344	5315	11948	10058	5865	28473	15957	16281	10466	15794	14124	23228	11569	13647	8547	9021	11903	0.160449	0.315906	0.160449	ATP transport
1370	419530	ENSGALG00000000378	6560	7344	5315	11948	10058	5865	28473	15957	16281	10466	15794	14124	23228	11569	13647	8547	9021	11903	0.160449	0.315906	0.160449	iron import into the mitochondrion
1371	419530	ENSGALG00000000378	6560	7344	5315	11948	10058	5865	28473	15957	16281	10466	15794	14124	23228	11569	13647	8547	9021	11903	0.160449	0.315906	0.160449	mitochondrial inner membrane
1372	374209	ENSGALG00000000379	1420	296	842	669	256	108	88	960	132	577	781	1795	108	275	335	70	124	98	0.298858	0.999779	0.298858	integrin-mediated signaling pathway
1373	374209	ENSGALG00000000379	1420	296	842	669	256	108	88	960	132	577	781	1795	108	275	335	70	124	98	0.298858	0.999779	0.298858	membrane
1374	374209	ENSGALG00000000379	1420	296	842	669	256	108	88	960	132	577	781	1795	108	275	335	70	124	98	0.298858	0.999779	0.298858	integral component of membrane
1375	374209	ENSGALG00000000379	1420	296	842	669	256	108	88	960	132	577	781	1795	108	275	335	70	124	98	0.298858	0.999779	0.298858	cell adhesion
1376	374209	ENSGALG00000000379	1420	296	842	669	256	108	88	960	132	577	781	1795	108	275	335	70	124	98	0.298858	0.999779	0.298858	cell migration
1377	374209	ENSGALG00000000379	1420	296	842	669	256	108	88	960	132	577	781	1795	108	275	335	70	124	98	0.298858	0.999779	0.298858	integrin binding
1378	374209	ENSGALG00000000379	1420	296	842	669	256	108	88	960	132	577	781	1795	108	275	335	70	124	98	0.298858	0.999779	0.298858	cell-matrix adhesion
1379	374209	ENSGALG00000000379	1420	296	842	669	256	108	88	960	132	577	781	1795	108	275	335	70	124	98	0.298858	0.999779	0.298858	focal adhesion
1380	374209	ENSGALG00000000379	1420	296	842	669	256	108	88	960	132	577	781	1795	108	275	335	70	124	98	0.298858	0.999779	0.298858	integrin complex
1381	374209	ENSGALG00000000379	1420	296	842	669	256	108	88	960	132	577	781	1795	108	275	335	70	124	98	0.298858	0.999779	0.298858	cell adhesion mediated by integrin
1382	374209	ENSGALG00000000379	1420	296	842	669	256	108	88	960	132	577	781	1795	108	275	335	70	124	98	0.298858	0.999779	0.298858	fibronectin binding
1383	374209	ENSGALG00000000379	1420	296	842	669	256	108	88	960	132	577	781	1795	108	275	335	70	124	98	0.298858	0.999779	0.298858	identical protein binding
1384	374209	ENSGALG00000000379	1420	296	842	669	256	108	88	960	132	577	781	1795	108	275	335	70	124	98	0.298858	0.999779	0.298858	external side of plasma membrane
1385	374209	ENSGALG00000000379	1420	296	842	669	256	108	88	960	132	577	781	1795	108	275	335	70	124	98	0.298858	0.999779	0.298858	protein kinase C binding
1386	374209	ENSGALG00000000379	1420	296	842	669	256	108	88	960	132	577	781	1795	108	275	335	70	124	98	0.298858	0.999779	0.298858	enzyme binding
1387	374209	ENSGALG00000000379	1420	296	842	669	256	108	88	960	132	577	781	1795	108	275	335	70	124	98	0.298858	0.999779	0.298858	positive regulation of cell-matrix adhesion
1388	374209	ENSGALG00000000379	1420	296	842	669	256	108	88	960	132	577	781	1795	108	275	335	70	124	98	0.298858	0.999779	0.298858	cell-substrate junction assembly
1389	374209	ENSGALG00000000379	1420	296	842	669	256	108	88	960	132	577	781	1795	108	275	335	70	124	98	0.298858	0.999779	0.298858	positive regulation of gene expression
1390	374209	ENSGALG00000000379	1420	296	842	669	256	108	88	960	132	577	781	1795	108	275	335	70	124	98	0.298858	0.999779	0.298858	positive regulation of fibroblast migration
1391	374209	ENSGALG00000000379	1420	296	842	669	256	108	88	960	132	577	781	1795	108	275	335	70	124	98	0.298858	0.999779	0.298858	regulation of cell migration
1392	374209	ENSGALG00000000379	1420	296	842	669	256	108	88	960	132	577	781	1795	108	275	335	70	124	98	0.298858	0.999779	0.298858	positive regulation of cell migration
1393	374209	ENSGALG00000000379	1420	296	842	669	256	108	88	960	132	577	781	1795	108	275	335	70	124	98	0.298858	0.999779	0.298858	regulation of protein localization
1394	374209	ENSGALG00000000379	1420	296	842	669	256	108	88	960	132	577	781	1795	108	275	335	70	124	98	0.298858	0.999779	0.298858	regulation of actin cytoskeleton organization
1395	374209	ENSGALG00000000379	1420	296	842	669	256	108	88	960	132	577	781	1795	108	275	335	70	124	98	0.298858	0.999779	0.298858	positive regulation of osteoblast proliferation
1396	374209	ENSGALG00000000379	1420	296	842	669	256	108	88	960	132	577	781	1795	108	275	335	70	124	98	0.298858	0.999779	0.298858	cellular response to platelet-derived growth factor stimulus
1397	374209	ENSGALG00000000379	1420	296	842	669	256	108	88	960	132	577	781	1795	108	275	335	70	124	98	0.298858	0.999779	0.298858	apoptotic cell clearance
1398	374209	ENSGALG00000000379	1420	296	842	669	256	108	88	960	132	577	781	1795	108	275	335	70	124	98	0.298858	0.999779	0.298858	platelet-derived growth factor receptor signaling pathway
1399	374209	ENSGALG00000000379	1420	296	842	669	256	108	88	960	132	577	781	1795	108	275	335	70	124	98	0.298858	0.999779	0.298858	positive regulation of fibroblast proliferation
1400	374209	ENSGALG00000000379	1420	296	842	669	256	108	88	960	132	577	781	1795	108	275	335	70	124	98	0.298858	0.999779	0.298858	regulation of serotonin uptake
1401	374209	ENSGALG00000000379	1420	296	842	669	256	108	88	960	132	577	781	1795	108	275	335	70	124	98	0.298858	0.999779	0.298858	regulation of protein tyrosine kinase activity
1402	374209	ENSGALG00000000379	1420	296	842	669	256	108	88	960	132	577	781	1795	108	275	335	70	124	98	0.298858	0.999779	0.298858	platelet aggregation
1403	374209	ENSGALG00000000379	1420	296	842	669	256	108	88	960	132	577	781	1795	108	275	335	70	124	98	0.298858	0.999779	0.298858	positive regulation of substrate adhesion-dependent cell spreading
1404	374209	ENSGALG00000000379	1420	296	842	669	256	108	88	960	132	577	781	1795	108	275	335	70	124	98	0.298858	0.999779	0.298858	regulation of extracellular matrix organization
1405	374209	ENSGALG00000000379	1420	296	842	669	256	108	88	960	132	577	781	1795	108	275	335	70	124	98	0.298858	0.999779	0.298858	positive regulation of T cell migration
1406	374209	ENSGALG00000000379	1420	296	842	669	256	108	88	960	132	577	781	1795	108	275	335	70	124	98	0.298858	0.999779	0.298858	cell surface
1407	374209	ENSGALG00000000379	1420	296	842	669	256	108	88	960	132	577	781	1795	108	275	335	70	124	98	0.298858	0.999779	0.298858	apical plasma membrane
1408	374209	ENSGALG00000000379	1420	296	842	669	256	108	88	960	132	577	781	1795	108	275	335	70	124	98	0.298858	0.999779	0.298858	alphav-beta3 integrin-PKCalpha complex
1409	374209	ENSGALG00000000379	1420	296	842	669	256	108	88	960	132	577	781	1795	108	275	335	70	124	98	0.298858	0.999779	0.298858	synapse
1410	374209	ENSGALG00000000379	1420	296	842	669	256	108	88	960	132	577	781	1795	108	275	335	70	124	98	0.298858	0.999779	0.298858	alpha9-beta1 integrin-ADAM8 complex
1411	419531	ENSGALG00000000390	620	978	847	834	806	778	1056	813	958	919	1017	935	1048	748	1061	913	730	936	0.982452	0.964461	0.982452	nucleotide binding
1412	419531	ENSGALG00000000390	620	978	847	834	806	778	1056	813	958	919	1017	935	1048	748	1061	913	730	936	0.982452	0.964461	0.982452	ATP binding
1413	419531	ENSGALG00000000390	620	978	847	834	806	778	1056	813	958	919	1017	935	1048	748	1061	913	730	936	0.982452	0.964461	0.982452	membrane
1414	419531	ENSGALG00000000390	620	978	847	834	806	778	1056	813	958	919	1017	935	1048	748	1061	913	730	936	0.982452	0.964461	0.982452	integral component of membrane
1415	419531	ENSGALG00000000390	620	978	847	834	806	778	1056	813	958	919	1017	935	1048	748	1061	913	730	936	0.982452	0.964461	0.982452	hydrolase activity
1416	419531	ENSGALG00000000390	620	978	847	834	806	778	1056	813	958	919	1017	935	1048	748	1061	913	730	936	0.982452	0.964461	0.982452	uridine-diphosphatase activity
1417	419531	ENSGALG00000000390	620	978	847	834	806	778	1056	813	958	919	1017	935	1048	748	1061	913	730	936	0.982452	0.964461	0.982452	UDP catabolic process
1418	419531	ENSGALG00000000390	620	978	847	834	806	778	1056	813	958	919	1017	935	1048	748	1061	913	730	936	0.982452	0.964461	0.982452	integral component of Golgi membrane
1419	419531	ENSGALG00000000390	620	978	847	834	806	778	1056	813	958	919	1017	935	1048	748	1061	913	730	936	0.982452	0.964461	0.982452	integral component of autophagosome membrane
1420	419805	ENSGALG00000000394	0	0	1	0	0	1	0	0	0	0	0	1	0	0	1	0	0	0	NA	NA	NA	membrane
1421	419805	ENSGALG00000000394	0	0	1	0	0	1	0	0	0	0	0	1	0	0	1	0	0	0	NA	NA	NA	integral component of membrane
1422	419805	ENSGALG00000000394	0	0	1	0	0	1	0	0	0	0	0	1	0	0	1	0	0	0	NA	NA	NA	integral component of plasma membrane
1423	419805	ENSGALG00000000394	0	0	1	0	0	1	0	0	0	0	0	1	0	0	1	0	0	0	NA	NA	NA	synaptic vesicle
1424	419805	ENSGALG00000000394	0	0	1	0	0	1	0	0	0	0	0	1	0	0	1	0	0	0	NA	NA	NA	glycine transport
1425	419805	ENSGALG00000000394	0	0	1	0	0	1	0	0	0	0	0	1	0	0	1	0	0	0	NA	NA	NA	transmembrane transport
1426	419805	ENSGALG00000000394	0	0	1	0	0	1	0	0	0	0	0	1	0	0	1	0	0	0	NA	NA	NA	symporter activity
1427	419805	ENSGALG00000000394	0	0	1	0	0	1	0	0	0	0	0	1	0	0	1	0	0	0	NA	NA	NA	leucine transport
1428	419805	ENSGALG00000000394	0	0	1	0	0	1	0	0	0	0	0	1	0	0	1	0	0	0	NA	NA	NA	neurotransmitter:sodium symporter activity
1429	419805	ENSGALG00000000394	0	0	1	0	0	1	0	0	0	0	0	1	0	0	1	0	0	0	NA	NA	NA	brain development
1430	419805	ENSGALG00000000394	0	0	1	0	0	1	0	0	0	0	0	1	0	0	1	0	0	0	NA	NA	NA	proline transport
1431	419805	ENSGALG00000000394	0	0	1	0	0	1	0	0	0	0	0	1	0	0	1	0	0	0	NA	NA	NA	alanine transport
1432	419948	ENSGALG00000000396	16	16	20	16	5	36	16	34	43	18	31	40	25	43	30	41	35	26	0.957933	0.995855	0.957933	transferase activity
1433	419948	ENSGALG00000000396	16	16	20	16	5	36	16	34	43	18	31	40	25	43	30	41	35	26	0.957933	0.995855	0.957933	methyltransferase activity
1434	419948	ENSGALG00000000396	16	16	20	16	5	36	16	34	43	18	31	40	25	43	30	41	35	26	0.957933	0.995855	0.957933	methylation
1435	419948	ENSGALG00000000396	16	16	20	16	5	36	16	34	43	18	31	40	25	43	30	41	35	26	0.957933	0.995855	0.957933	tRNA processing
1436	419948	ENSGALG00000000396	16	16	20	16	5	36	16	34	43	18	31	40	25	43	30	41	35	26	0.957933	0.995855	0.957933	tRNA methylation
1437	419948	ENSGALG00000000396	16	16	20	16	5	36	16	34	43	18	31	40	25	43	30	41	35	26	0.957933	0.995855	0.957933	tRNA (cytosine-3-)-methyltransferase activity
1438	419948	ENSGALG00000000396	16	16	20	16	5	36	16	34	43	18	31	40	25	43	30	41	35	26	0.957933	0.995855	0.957933	tRNA (cytosine) methyltransferase activity
1439	421167	ENSGALG00000000397	734	638	731	564	881	765	243	274	399	338	251	235	352	435	438	453	498	468	0.824761	0.972417	0.824761	cytosol
1440	421167	ENSGALG00000000397	734	638	731	564	881	765	243	274	399	338	251	235	352	435	438	453	498	468	0.824761	0.972417	0.824761	cytoplasm
1441	421167	ENSGALG00000000397	734	638	731	564	881	765	243	274	399	338	251	235	352	435	438	453	498	468	0.824761	0.972417	0.824761	intracellular protein transport
1442	421167	ENSGALG00000000397	734	638	731	564	881	765	243	274	399	338	251	235	352	435	438	453	498	468	0.824761	0.972417	0.824761	nuclear envelope
1443	421167	ENSGALG00000000397	734	638	731	564	881	765	243	274	399	338	251	235	352	435	438	453	498	468	0.824761	0.972417	0.824761	Ran GTPase binding
1444	421167	ENSGALG00000000397	734	638	731	564	881	765	243	274	399	338	251	235	352	435	438	453	498	468	0.824761	0.972417	0.824761	protein import into nucleus
1445	421167	ENSGALG00000000397	734	638	731	564	881	765	243	274	399	338	251	235	352	435	438	453	498	468	0.824761	0.972417	0.824761	nuclear import signal receptor activity
1446	430912	ENSGALG00000000399	0	0	0	0	1	0	0	1	0	0	2	3	1	0	0	2	0	0	NA	NA	NA	phosphatase activity
1447	430912	ENSGALG00000000399	0	0	0	0	1	0	0	1	0	0	2	3	1	0	0	2	0	0	NA	NA	NA	protein dephosphorylation
1448	430912	ENSGALG00000000399	0	0	0	0	1	0	0	1	0	0	2	3	1	0	0	2	0	0	NA	NA	NA	dephosphorylation
1449	430912	ENSGALG00000000399	0	0	0	0	1	0	0	1	0	0	2	3	1	0	0	2	0	0	NA	NA	NA	protein tyrosine/serine/threonine phosphatase activity
1450	430912	ENSGALG00000000399	0	0	0	0	1	0	0	1	0	0	2	3	1	0	0	2	0	0	NA	NA	NA	MAP kinase tyrosine/serine/threonine phosphatase activity
1451	430912	ENSGALG00000000399	0	0	0	0	1	0	0	1	0	0	2	3	1	0	0	2	0	0	NA	NA	NA	inactivation of MAPK activity
1452	419806	ENSGALG00000000400	0	0	0	0	1	0	0	0	0	0	0	0	0	0	0	0	0	0	NA	NA	NA	membrane
1453	419806	ENSGALG00000000400	0	0	0	0	1	0	0	0	0	0	0	0	0	0	0	0	0	0	NA	NA	NA	integral component of membrane
1454	419806	ENSGALG00000000400	0	0	0	0	1	0	0	0	0	0	0	0	0	0	0	0	0	0	NA	NA	NA	transmembrane transport
1455	419806	ENSGALG00000000400	0	0	0	0	1	0	0	0	0	0	0	0	0	0	0	0	0	0	NA	NA	NA	ion channel activity
1456	419806	ENSGALG00000000400	0	0	0	0	1	0	0	0	0	0	0	0	0	0	0	0	0	0	NA	NA	NA	voltage-gated ion channel activity
1457	419806	ENSGALG00000000400	0	0	0	0	1	0	0	0	0	0	0	0	0	0	0	0	0	0	NA	NA	NA	voltage-gated potassium channel activity
1458	419806	ENSGALG00000000400	0	0	0	0	1	0	0	0	0	0	0	0	0	0	0	0	0	0	NA	NA	NA	potassium channel activity
1459	419806	ENSGALG00000000400	0	0	0	0	1	0	0	0	0	0	0	0	0	0	0	0	0	0	NA	NA	NA	ion transport
1460	419806	ENSGALG00000000400	0	0	0	0	1	0	0	0	0	0	0	0	0	0	0	0	0	0	NA	NA	NA	potassium ion transport
1461	419806	ENSGALG00000000400	0	0	0	0	1	0	0	0	0	0	0	0	0	0	0	0	0	0	NA	NA	NA	regulation of ion transmembrane transport
1462	419806	ENSGALG00000000400	0	0	0	0	1	0	0	0	0	0	0	0	0	0	0	0	0	0	NA	NA	NA	potassium ion transmembrane transport
1463	419806	ENSGALG00000000400	0	0	0	0	1	0	0	0	0	0	0	0	0	0	0	0	0	0	NA	NA	NA	protein homooligomerization
1464	419806	ENSGALG00000000400	0	0	0	0	1	0	0	0	0	0	0	0	0	0	0	0	0	0	NA	NA	NA	voltage-gated potassium channel complex
1465	419806	ENSGALG00000000400	0	0	0	0	1	0	0	0	0	0	0	0	0	0	0	0	0	0	NA	NA	NA	protein binding
1466	419806	ENSGALG00000000400	0	0	0	0	1	0	0	0	0	0	0	0	0	0	0	0	0	0	NA	NA	NA	axon
1467	419806	ENSGALG00000000400	0	0	0	0	1	0	0	0	0	0	0	0	0	0	0	0	0	0	NA	NA	NA	neuronal cell body
1468	419806	ENSGALG00000000400	0	0	0	0	1	0	0	0	0	0	0	0	0	0	0	0	0	0	NA	NA	NA	delayed rectifier potassium channel activity
1469	419806	ENSGALG00000000400	0	0	0	0	1	0	0	0	0	0	0	0	0	0	0	0	0	0	NA	NA	NA	dendrite membrane
1470	419806	ENSGALG00000000400	0	0	0	0	1	0	0	0	0	0	0	0	0	0	0	0	0	0	NA	NA	NA	neuronal cell body membrane
1471	419806	ENSGALG00000000400	0	0	0	0	1	0	0	0	0	0	0	0	0	0	0	0	0	0	NA	NA	NA	regulation of neurotransmitter secretion
1472	419806	ENSGALG00000000400	0	0	0	0	1	0	0	0	0	0	0	0	0	0	0	0	0	0	NA	NA	NA	neuromuscular junction
1473	419806	ENSGALG00000000400	0	0	0	0	1	0	0	0	0	0	0	0	0	0	0	0	0	0	NA	NA	NA	axon terminus
1474	100859595	ENSGALG00000000401	663	572	515	553	631	786	562	762	785	718	707	697	654	735	639	806	888	946	0.835142	0.94656	0.835142	nucleus
1475	100859595	ENSGALG00000000401	663	572	515	553	631	786	562	762	785	718	707	697	654	735	639	806	888	946	0.835142	0.94656	0.835142	nucleic acid binding
1476	100859595	ENSGALG00000000401	663	572	515	553	631	786	562	762	785	718	707	697	654	735	639	806	888	946	0.835142	0.94656	0.835142	RNA binding
1477	100859595	ENSGALG00000000401	663	572	515	553	631	786	562	762	785	718	707	697	654	735	639	806	888	946	0.835142	0.94656	0.835142	mRNA splicing, via spliceosome
1478	100859595	ENSGALG00000000401	663	572	515	553	631	786	562	762	785	718	707	697	654	735	639	806	888	946	0.835142	0.94656	0.835142	mRNA binding
1479	100859595	ENSGALG00000000401	663	572	515	553	631	786	562	762	785	718	707	697	654	735	639	806	888	946	0.835142	0.94656	0.835142	negative regulation of transcription by RNA polymerase II
1480	100859595	ENSGALG00000000401	663	572	515	553	631	786	562	762	785	718	707	697	654	735	639	806	888	946	0.835142	0.94656	0.835142	regulation of alternative mRNA splicing, via spliceosome
1481	100859595	ENSGALG00000000401	663	572	515	553	631	786	562	762	785	718	707	697	654	735	639	806	888	946	0.835142	0.94656	0.835142	RNA methylation
1482	100859595	ENSGALG00000000401	663	572	515	553	631	786	562	762	785	718	707	697	654	735	639	806	888	946	0.835142	0.94656	0.835142	branching involved in blood vessel morphogenesis
1483	100859595	ENSGALG00000000401	663	572	515	553	631	786	562	762	785	718	707	697	654	735	639	806	888	946	0.835142	0.94656	0.835142	positive regulation of transcription of Notch receptor target
1484	100859595	ENSGALG00000000401	663	572	515	553	631	786	562	762	785	718	707	697	654	735	639	806	888	946	0.835142	0.94656	0.835142	thrombopoietin-mediated signaling pathway
1485	100859595	ENSGALG00000000401	663	572	515	553	631	786	562	762	785	718	707	697	654	735	639	806	888	946	0.835142	0.94656	0.835142	negative regulation of myeloid cell differentiation
1486	100859595	ENSGALG00000000401	663	572	515	553	631	786	562	762	785	718	707	697	654	735	639	806	888	946	0.835142	0.94656	0.835142	regulation of megakaryocyte differentiation
1487	100859595	ENSGALG00000000401	663	572	515	553	631	786	562	762	785	718	707	697	654	735	639	806	888	946	0.835142	0.94656	0.835142	spleen development
1488	100859595	ENSGALG00000000401	663	572	515	553	631	786	562	762	785	718	707	697	654	735	639	806	888	946	0.835142	0.94656	0.835142	ventricular septum morphogenesis
1489	100859595	ENSGALG00000000401	663	572	515	553	631	786	562	762	785	718	707	697	654	735	639	806	888	946	0.835142	0.94656	0.835142	nucleoplasm
1490	100859595	ENSGALG00000000401	663	572	515	553	631	786	562	762	785	718	707	697	654	735	639	806	888	946	0.835142	0.94656	0.835142	nuclear speck
1491	100859595	ENSGALG00000000401	663	572	515	553	631	786	562	762	785	718	707	697	654	735	639	806	888	946	0.835142	0.94656	0.835142	RNA N6-methyladenosine methyltransferase complex
1492	100859595	ENSGALG00000000401	663	572	515	553	631	786	562	762	785	718	707	697	654	735	639	806	888	946	0.835142	0.94656	0.835142	dosage compensation by inactivation of X chromosome
1493	100859595	ENSGALG00000000401	663	572	515	553	631	786	562	762	785	718	707	697	654	735	639	806	888	946	0.835142	0.94656	0.835142	placenta blood vessel development
1494	419533	ENSGALG00000000402	46	40	48	42	24	64	38	21	28	35	14	15	19	16	36	21	41	31	0.881322	0.956884	0.881322	protein-lysine 6-oxidase activity
1495	419533	ENSGALG00000000402	46	40	48	42	24	64	38	21	28	35	14	15	19	16	36	21	41	31	0.881322	0.956884	0.881322	peptidyl-lysine oxidation
1496	419533	ENSGALG00000000402	46	40	48	42	24	64	38	21	28	35	14	15	19	16	36	21	41	31	0.881322	0.956884	0.881322	scavenger receptor activity
1497	419533	ENSGALG00000000402	46	40	48	42	24	64	38	21	28	35	14	15	19	16	36	21	41	31	0.881322	0.956884	0.881322	copper ion binding
1498	419533	ENSGALG00000000402	46	40	48	42	24	64	38	21	28	35	14	15	19	16	36	21	41	31	0.881322	0.956884	0.881322	calcium ion binding
1499	419533	ENSGALG00000000402	46	40	48	42	24	64	38	21	28	35	14	15	19	16	36	21	41	31	0.881322	0.956884	0.881322	oxidoreductase activity, acting on the CH-NH2 group of donors, oxygen as acceptor
1500	419533	ENSGALG00000000402	46	40	48	42	24	64	38	21	28	35	14	15	19	16	36	21	41	31	0.881322	0.956884	0.881322	oligosaccharide binding
1501	419533	ENSGALG00000000402	46	40	48	42	24	64	38	21	28	35	14	15	19	16	36	21	41	31	0.881322	0.956884	0.881322	negative regulation of transcription by RNA polymerase II
1502	419533	ENSGALG00000000402	46	40	48	42	24	64	38	21	28	35	14	15	19	16	36	21	41	31	0.881322	0.956884	0.881322	response to hypoxia
1503	419533	ENSGALG00000000402	46	40	48	42	24	64	38	21	28	35	14	15	19	16	36	21	41	31	0.881322	0.956884	0.881322	epithelial to mesenchymal transition
1504	419533	ENSGALG00000000402	46	40	48	42	24	64	38	21	28	35	14	15	19	16	36	21	41	31	0.881322	0.956884	0.881322	endothelial cell proliferation
1505	419533	ENSGALG00000000402	46	40	48	42	24	64	38	21	28	35	14	15	19	16	36	21	41	31	0.881322	0.956884	0.881322	sprouting angiogenesis
1506	419533	ENSGALG00000000402	46	40	48	42	24	64	38	21	28	35	14	15	19	16	36	21	41	31	0.881322	0.956884	0.881322	cellular protein modification process
1507	419533	ENSGALG00000000402	46	40	48	42	24	64	38	21	28	35	14	15	19	16	36	21	41	31	0.881322	0.956884	0.881322	endocytosis
1508	419533	ENSGALG00000000402	46	40	48	42	24	64	38	21	28	35	14	15	19	16	36	21	41	31	0.881322	0.956884	0.881322	positive regulation of epithelial to mesenchymal transition
1509	419533	ENSGALG00000000402	46	40	48	42	24	64	38	21	28	35	14	15	19	16	36	21	41	31	0.881322	0.956884	0.881322	collagen fibril organization
1510	419533	ENSGALG00000000402	46	40	48	42	24	64	38	21	28	35	14	15	19	16	36	21	41	31	0.881322	0.956884	0.881322	positive regulation of chondrocyte differentiation
1511	419533	ENSGALG00000000402	46	40	48	42	24	64	38	21	28	35	14	15	19	16	36	21	41	31	0.881322	0.956884	0.881322	endothelial cell migration
1512	419533	ENSGALG00000000402	46	40	48	42	24	64	38	21	28	35	14	15	19	16	36	21	41	31	0.881322	0.956884	0.881322	negative regulation of transcription, DNA-templated
1513	419533	ENSGALG00000000402	46	40	48	42	24	64	38	21	28	35	14	15	19	16	36	21	41	31	0.881322	0.956884	0.881322	response to copper ion
1514	419533	ENSGALG00000000402	46	40	48	42	24	64	38	21	28	35	14	15	19	16	36	21	41	31	0.881322	0.956884	0.881322	oxidation-reduction process
1515	419533	ENSGALG00000000402	46	40	48	42	24	64	38	21	28	35	14	15	19	16	36	21	41	31	0.881322	0.956884	0.881322	heterochromatin organization
1516	419533	ENSGALG00000000402	46	40	48	42	24	64	38	21	28	35	14	15	19	16	36	21	41	31	0.881322	0.956884	0.881322	negative regulation of stem cell population maintenance
1517	419533	ENSGALG00000000402	46	40	48	42	24	64	38	21	28	35	14	15	19	16	36	21	41	31	0.881322	0.956884	0.881322	chromatin
1518	419533	ENSGALG00000000402	46	40	48	42	24	64	38	21	28	35	14	15	19	16	36	21	41	31	0.881322	0.956884	0.881322	extracellular space
1519	419533	ENSGALG00000000402	46	40	48	42	24	64	38	21	28	35	14	15	19	16	36	21	41	31	0.881322	0.956884	0.881322	nucleus
1520	419533	ENSGALG00000000402	46	40	48	42	24	64	38	21	28	35	14	15	19	16	36	21	41	31	0.881322	0.956884	0.881322	nucleoplasm
1521	419533	ENSGALG00000000402	46	40	48	42	24	64	38	21	28	35	14	15	19	16	36	21	41	31	0.881322	0.956884	0.881322	endoplasmic reticulum
1522	419533	ENSGALG00000000402	46	40	48	42	24	64	38	21	28	35	14	15	19	16	36	21	41	31	0.881322	0.956884	0.881322	membrane
1523	419533	ENSGALG00000000402	46	40	48	42	24	64	38	21	28	35	14	15	19	16	36	21	41	31	0.881322	0.956884	0.881322	metal ion binding
1524	419533	ENSGALG00000000402	46	40	48	42	24	64	38	21	28	35	14	15	19	16	36	21	41	31	0.881322	0.956884	0.881322	extracellular region
1525	419533	ENSGALG00000000402	46	40	48	42	24	64	38	21	28	35	14	15	19	16	36	21	41	31	0.881322	0.956884	0.881322	oxidoreductase activity
1526	430917	ENSGALG00000000404	290	402	355	289	323	326	254	353	389	247	364	376	412	346	292	381	285	338	0.919106	0.984846	0.919106	nucleus
1527	430917	ENSGALG00000000404	290	402	355	289	323	326	254	353	389	247	364	376	412	346	292	381	285	338	0.919106	0.984846	0.919106	cytoplasm
1528	430917	ENSGALG00000000404	290	402	355	289	323	326	254	353	389	247	364	376	412	346	292	381	285	338	0.919106	0.984846	0.919106	COP9 signalosome
1529	430917	ENSGALG00000000404	290	402	355	289	323	326	254	353	389	247	364	376	412	346	292	381	285	338	0.919106	0.984846	0.919106	transcription corepressor activity
1530	430917	ENSGALG00000000404	290	402	355	289	323	326	254	353	389	247	364	376	412	346	292	381	285	338	0.919106	0.984846	0.919106	negative regulation of transcription, DNA-templated
1531	430917	ENSGALG00000000404	290	402	355	289	323	326	254	353	389	247	364	376	412	346	292	381	285	338	0.919106	0.984846	0.919106	protein deneddylation
1532	430917	ENSGALG00000000404	290	402	355	289	323	326	254	353	389	247	364	376	412	346	292	381	285	338	0.919106	0.984846	0.919106	protein phosphorylation
1533	430917	ENSGALG00000000404	290	402	355	289	323	326	254	353	389	247	364	376	412	346	292	381	285	338	0.919106	0.984846	0.919106	cell population proliferation
1534	430917	ENSGALG00000000404	290	402	355	289	323	326	254	353	389	247	364	376	412	346	292	381	285	338	0.919106	0.984846	0.919106	skeletal muscle cell differentiation
1535	430917	ENSGALG00000000404	290	402	355	289	323	326	254	353	389	247	364	376	412	346	292	381	285	338	0.919106	0.984846	0.919106	protein binding
1536	430917	ENSGALG00000000404	290	402	355	289	323	326	254	353	389	247	364	376	412	346	292	381	285	338	0.919106	0.984846	0.919106	inner cell mass cell proliferation
1537	420055	ENSGALG00000000407	6	8	2	7	3	4	15	3	3	6	3	10	3	4	7	6	4	1	0.997533	0.993559	0.997533	protein binding
1538	419535	ENSGALG00000000409	5567	5267	4897	6833	6947	5826	7093	5013	5713	5679	6113	5397	6316	5823	5840	5380	5802	5562	0.345044	0.629016	0.345044	nucleus
1539	419535	ENSGALG00000000409	5567	5267	4897	6833	6947	5826	7093	5013	5713	5679	6113	5397	6316	5823	5840	5380	5802	5562	0.345044	0.629016	0.345044	cytoplasm
1540	419535	ENSGALG00000000409	5567	5267	4897	6833	6947	5826	7093	5013	5713	5679	6113	5397	6316	5823	5840	5380	5802	5562	0.345044	0.629016	0.345044	late endosome to vacuole transport via multivesicular body sorting pathway
1541	419535	ENSGALG00000000409	5567	5267	4897	6833	6947	5826	7093	5013	5713	5679	6113	5397	6316	5823	5840	5380	5802	5562	0.345044	0.629016	0.345044	protein transport
1542	419535	ENSGALG00000000409	5567	5267	4897	6833	6947	5826	7093	5013	5713	5679	6113	5397	6316	5823	5840	5380	5802	5562	0.345044	0.629016	0.345044	vacuolar transport
1543	419535	ENSGALG00000000409	5567	5267	4897	6833	6947	5826	7093	5013	5713	5679	6113	5397	6316	5823	5840	5380	5802	5562	0.345044	0.629016	0.345044	vesicle budding from membrane
1544	419535	ENSGALG00000000409	5567	5267	4897	6833	6947	5826	7093	5013	5713	5679	6113	5397	6316	5823	5840	5380	5802	5562	0.345044	0.629016	0.345044	multivesicular body
1545	419535	ENSGALG00000000409	5567	5267	4897	6833	6947	5826	7093	5013	5713	5679	6113	5397	6316	5823	5840	5380	5802	5562	0.345044	0.629016	0.345044	nuclear envelope
1546	419535	ENSGALG00000000409	5567	5267	4897	6833	6947	5826	7093	5013	5713	5679	6113	5397	6316	5823	5840	5380	5802	5562	0.345044	0.629016	0.345044	exit from mitosis
1547	419535	ENSGALG00000000409	5567	5267	4897	6833	6947	5826	7093	5013	5713	5679	6113	5397	6316	5823	5840	5380	5802	5562	0.345044	0.629016	0.345044	nuclear envelope reassembly
1548	419535	ENSGALG00000000409	5567	5267	4897	6833	6947	5826	7093	5013	5713	5679	6113	5397	6316	5823	5840	5380	5802	5562	0.345044	0.629016	0.345044	ESCRT III complex
1549	419535	ENSGALG00000000409	5567	5267	4897	6833	6947	5826	7093	5013	5713	5679	6113	5397	6316	5823	5840	5380	5802	5562	0.345044	0.629016	0.345044	nucleus organization
1550	419535	ENSGALG00000000409	5567	5267	4897	6833	6947	5826	7093	5013	5713	5679	6113	5397	6316	5823	5840	5380	5802	5562	0.345044	0.629016	0.345044	mitotic metaphase plate congression
1551	419535	ENSGALG00000000409	5567	5267	4897	6833	6947	5826	7093	5013	5713	5679	6113	5397	6316	5823	5840	5380	5802	5562	0.345044	0.629016	0.345044	late endosome to vacuole transport
1552	419535	ENSGALG00000000409	5567	5267	4897	6833	6947	5826	7093	5013	5713	5679	6113	5397	6316	5823	5840	5380	5802	5562	0.345044	0.629016	0.345044	midbody abscission
1553	419535	ENSGALG00000000409	5567	5267	4897	6833	6947	5826	7093	5013	5713	5679	6113	5397	6316	5823	5840	5380	5802	5562	0.345044	0.629016	0.345044	protein localization to chromatin
1554	419535	ENSGALG00000000409	5567	5267	4897	6833	6947	5826	7093	5013	5713	5679	6113	5397	6316	5823	5840	5380	5802	5562	0.345044	0.629016	0.345044	chromatin
1555	419535	ENSGALG00000000409	5567	5267	4897	6833	6947	5826	7093	5013	5713	5679	6113	5397	6316	5823	5840	5380	5802	5562	0.345044	0.629016	0.345044	nucleoplasm
1556	419535	ENSGALG00000000409	5567	5267	4897	6833	6947	5826	7093	5013	5713	5679	6113	5397	6316	5823	5840	5380	5802	5562	0.345044	0.629016	0.345044	cytosol
1557	419949	ENSGALG00000000410	1845	1868	1700	1955	2231	1849	2092	1471	1574	1553	1601	1606	1945	1708	1555	1428	1749	1517	0.62641	0.85699	0.62641	nucleotide binding
1558	419949	ENSGALG00000000410	1845	1868	1700	1955	2231	1849	2092	1471	1574	1553	1601	1606	1945	1708	1555	1428	1749	1517	0.62641	0.85699	0.62641	ATP binding
1559	419949	ENSGALG00000000410	1845	1868	1700	1955	2231	1849	2092	1471	1574	1553	1601	1606	1945	1708	1555	1428	1749	1517	0.62641	0.85699	0.62641	protein kinase activity
1560	419949	ENSGALG00000000410	1845	1868	1700	1955	2231	1849	2092	1471	1574	1553	1601	1606	1945	1708	1555	1428	1749	1517	0.62641	0.85699	0.62641	protein serine/threonine kinase activity
1561	419949	ENSGALG00000000410	1845	1868	1700	1955	2231	1849	2092	1471	1574	1553	1601	1606	1945	1708	1555	1428	1749	1517	0.62641	0.85699	0.62641	protein phosphorylation
1562	419949	ENSGALG00000000410	1845	1868	1700	1955	2231	1849	2092	1471	1574	1553	1601	1606	1945	1708	1555	1428	1749	1517	0.62641	0.85699	0.62641	nucleus
1563	419949	ENSGALG00000000410	1845	1868	1700	1955	2231	1849	2092	1471	1574	1553	1601	1606	1945	1708	1555	1428	1749	1517	0.62641	0.85699	0.62641	peptidyl-serine phosphorylation
1564	419949	ENSGALG00000000410	1845	1868	1700	1955	2231	1849	2092	1471	1574	1553	1601	1606	1945	1708	1555	1428	1749	1517	0.62641	0.85699	0.62641	intracellular signal transduction
1565	419949	ENSGALG00000000410	1845	1868	1700	1955	2231	1849	2092	1471	1574	1553	1601	1606	1945	1708	1555	1428	1749	1517	0.62641	0.85699	0.62641	chromosome segregation
1566	419949	ENSGALG00000000410	1845	1868	1700	1955	2231	1849	2092	1471	1574	1553	1601	1606	1945	1708	1555	1428	1749	1517	0.62641	0.85699	0.62641	regulation of chromatin assembly or disassembly
1567	419949	ENSGALG00000000410	1845	1868	1700	1955	2231	1849	2092	1471	1574	1553	1601	1606	1945	1708	1555	1428	1749	1517	0.62641	0.85699	0.62641	cellular response to DNA damage stimulus
1568	419949	ENSGALG00000000410	1845	1868	1700	1955	2231	1849	2092	1471	1574	1553	1601	1606	1945	1708	1555	1428	1749	1517	0.62641	0.85699	0.62641	negative regulation of proteasomal ubiquitin-dependent protein catabolic process
1569	419949	ENSGALG00000000410	1845	1868	1700	1955	2231	1849	2092	1471	1574	1553	1601	1606	1945	1708	1555	1428	1749	1517	0.62641	0.85699	0.62641	cellular response to gamma radiation
1570	419949	ENSGALG00000000410	1845	1868	1700	1955	2231	1849	2092	1471	1574	1553	1601	1606	1945	1708	1555	1428	1749	1517	0.62641	0.85699	0.62641	intermediate filament
1571	419949	ENSGALG00000000410	1845	1868	1700	1955	2231	1849	2092	1471	1574	1553	1601	1606	1945	1708	1555	1428	1749	1517	0.62641	0.85699	0.62641	perinuclear region of cytoplasm
1572	419949	ENSGALG00000000410	1845	1868	1700	1955	2231	1849	2092	1471	1574	1553	1601	1606	1945	1708	1555	1428	1749	1517	0.62641	0.85699	0.62641	identical protein binding
1573	419809	ENSGALG00000000417	25	23	39	22	36	40	26	57	30	30	37	36	12	38	46	40	49	37	0.910487	0.984846	0.910487	membrane
1574	419809	ENSGALG00000000417	25	23	39	22	36	40	26	57	30	30	37	36	12	38	46	40	49	37	0.910487	0.984846	0.910487	integral component of membrane
1575	419809	ENSGALG00000000417	25	23	39	22	36	40	26	57	30	30	37	36	12	38	46	40	49	37	0.910487	0.984846	0.910487	monocarboxylic acid transmembrane transporter activity
1576	419809	ENSGALG00000000417	25	23	39	22	36	40	26	57	30	30	37	36	12	38	46	40	49	37	0.910487	0.984846	0.910487	monocarboxylic acid transport
1577	419809	ENSGALG00000000417	25	23	39	22	36	40	26	57	30	30	37	36	12	38	46	40	49	37	0.910487	0.984846	0.910487	transmembrane transport
1578	419809	ENSGALG00000000417	25	23	39	22	36	40	26	57	30	30	37	36	12	38	46	40	49	37	0.910487	0.984846	0.910487	integral component of plasma membrane
1579	419809	ENSGALG00000000417	25	23	39	22	36	40	26	57	30	30	37	36	12	38	46	40	49	37	0.910487	0.984846	0.910487	transmembrane transporter activity
1580	419811	ENSGALG00000000419	1750	1768	1201	1804	861	1880	1971	1935	2091	1812	1772	1869	2502	1762	1932	2299	1768	1935	0.955736	0.999663	0.955736	Ragulator complex
1581	419811	ENSGALG00000000419	1750	1768	1201	1804	861	1880	1971	1935	2091	1812	1772	1869	2502	1762	1932	2299	1768	1935	0.955736	0.999663	0.955736	negative regulation of cysteine-type endopeptidase activity involved in apoptotic process
1582	419811	ENSGALG00000000419	1750	1768	1201	1804	861	1880	1971	1935	2091	1812	1772	1869	2502	1762	1932	2299	1768	1935	0.955736	0.999663	0.955736	viral genome replication
1583	419811	ENSGALG00000000419	1750	1768	1201	1804	861	1880	1971	1935	2091	1812	1772	1869	2502	1762	1932	2299	1768	1935	0.955736	0.999663	0.955736	cytoplasm
1584	419811	ENSGALG00000000419	1750	1768	1201	1804	861	1880	1971	1935	2091	1812	1772	1869	2502	1762	1932	2299	1768	1935	0.955736	0.999663	0.955736	cellular response to amino acid stimulus
1585	419811	ENSGALG00000000419	1750	1768	1201	1804	861	1880	1971	1935	2091	1812	1772	1869	2502	1762	1932	2299	1768	1935	0.955736	0.999663	0.955736	positive regulation of TORC1 signaling
1586	419811	ENSGALG00000000419	1750	1768	1201	1804	861	1880	1971	1935	2091	1812	1772	1869	2502	1762	1932	2299	1768	1935	0.955736	0.999663	0.955736	negative regulation of apoptotic process
1587	419811	ENSGALG00000000419	1750	1768	1201	1804	861	1880	1971	1935	2091	1812	1772	1869	2502	1762	1932	2299	1768	1935	0.955736	0.999663	0.955736	lysosome
1588	419811	ENSGALG00000000419	1750	1768	1201	1804	861	1880	1971	1935	2091	1812	1772	1869	2502	1762	1932	2299	1768	1935	0.955736	0.999663	0.955736	guanyl-nucleotide exchange factor activity
1589	419811	ENSGALG00000000419	1750	1768	1201	1804	861	1880	1971	1935	2091	1812	1772	1869	2502	1762	1932	2299	1768	1935	0.955736	0.999663	0.955736	cytosol
1590	414829	ENSGALG00000000424	153	141	199	124	108	191	65	134	100	120	80	89	81	84	147	89	100	87	0.937187	0.99514	0.937187	membrane
1591	414829	ENSGALG00000000424	153	141	199	124	108	191	65	134	100	120	80	89	81	84	147	89	100	87	0.937187	0.99514	0.937187	integral component of membrane
1592	414829	ENSGALG00000000424	153	141	199	124	108	191	65	134	100	120	80	89	81	84	147	89	100	87	0.937187	0.99514	0.937187	positive regulation of B cell receptor signaling pathway
1593	414829	ENSGALG00000000424	153	141	199	124	108	191	65	134	100	120	80	89	81	84	147	89	100	87	0.937187	0.99514	0.937187	cytoplasm
1594	414829	ENSGALG00000000424	153	141	199	124	108	191	65	134	100	120	80	89	81	84	147	89	100	87	0.937187	0.99514	0.937187	cytosol
1595	414829	ENSGALG00000000424	153	141	199	124	108	191	65	134	100	120	80	89	81	84	147	89	100	87	0.937187	0.99514	0.937187	cytoplasmic vesicle
1596	414829	ENSGALG00000000424	153	141	199	124	108	191	65	134	100	120	80	89	81	84	147	89	100	87	0.937187	0.99514	0.937187	nuclear membrane
1597	414829	ENSGALG00000000424	153	141	199	124	108	191	65	134	100	120	80	89	81	84	147	89	100	87	0.937187	0.99514	0.937187	blastocyst hatching
1598	420056	ENSGALG00000000430	241	296	298	278	213	304	462	428	478	403	372	392	362	357	342	304	305	386	0.824761	0.995753	0.824761	aspartic endopeptidase activity, intramembrane cleaving
1599	420056	ENSGALG00000000430	241	296	298	278	213	304	462	428	478	403	372	392	362	357	342	304	305	386	0.824761	0.995753	0.824761	membrane
1600	420056	ENSGALG00000000430	241	296	298	278	213	304	462	428	478	403	372	392	362	357	342	304	305	386	0.824761	0.995753	0.824761	integral component of membrane
1601	420056	ENSGALG00000000430	241	296	298	278	213	304	462	428	478	403	372	392	362	357	342	304	305	386	0.824761	0.995753	0.824761	lysosomal membrane
1602	420056	ENSGALG00000000430	241	296	298	278	213	304	462	428	478	403	372	392	362	357	342	304	305	386	0.824761	0.995753	0.824761	aspartic-type endopeptidase activity
1603	420056	ENSGALG00000000430	241	296	298	278	213	304	462	428	478	403	372	392	362	357	342	304	305	386	0.824761	0.995753	0.824761	membrane protein intracellular domain proteolysis
1604	420056	ENSGALG00000000430	241	296	298	278	213	304	462	428	478	403	372	392	362	357	342	304	305	386	0.824761	0.995753	0.824761	membrane protein proteolysis
1605	420056	ENSGALG00000000430	241	296	298	278	213	304	462	428	478	403	372	392	362	357	342	304	305	386	0.824761	0.995753	0.824761	Golgi-associated vesicle membrane
1606	420056	ENSGALG00000000430	241	296	298	278	213	304	462	428	478	403	372	392	362	357	342	304	305	386	0.824761	0.995753	0.824761	integral component of cytoplasmic side of endoplasmic reticulum membrane
1607	420056	ENSGALG00000000430	241	296	298	278	213	304	462	428	478	403	372	392	362	357	342	304	305	386	0.824761	0.995753	0.824761	integral component of lumenal side of endoplasmic reticulum membrane
1608	420056	ENSGALG00000000430	241	296	298	278	213	304	462	428	478	403	372	392	362	357	342	304	305	386	0.824761	0.995753	0.824761	endosome
1609	420056	ENSGALG00000000430	241	296	298	278	213	304	462	428	478	403	372	392	362	357	342	304	305	386	0.824761	0.995753	0.824761	endosome membrane
1610	420056	ENSGALG00000000430	241	296	298	278	213	304	462	428	478	403	372	392	362	357	342	304	305	386	0.824761	0.995753	0.824761	protein homodimerization activity
1611	420056	ENSGALG00000000430	241	296	298	278	213	304	462	428	478	403	372	392	362	357	342	304	305	386	0.824761	0.995753	0.824761	membrane protein ectodomain proteolysis
1612	420056	ENSGALG00000000430	241	296	298	278	213	304	462	428	478	403	372	392	362	357	342	304	305	386	0.824761	0.995753	0.824761	regulation of immune response
1613	420056	ENSGALG00000000430	241	296	298	278	213	304	462	428	478	403	372	392	362	357	342	304	305	386	0.824761	0.995753	0.824761	nucleoplasm
1614	420056	ENSGALG00000000430	241	296	298	278	213	304	462	428	478	403	372	392	362	357	342	304	305	386	0.824761	0.995753	0.824761	centrosome
1615	420056	ENSGALG00000000430	241	296	298	278	213	304	462	428	478	403	372	392	362	357	342	304	305	386	0.824761	0.995753	0.824761	plasma membrane
1616	420056	ENSGALG00000000430	241	296	298	278	213	304	462	428	478	403	372	392	362	357	342	304	305	386	0.824761	0.995753	0.824761	actin cytoskeleton
1617	100857247	ENSGALG00000000433	25	73	48	73	71	55	45	40	42	40	23	41	75	15	46	17	27	16	0.722056	0.622599	0.722056	nucleotide binding
1618	100857247	ENSGALG00000000433	25	73	48	73	71	55	45	40	42	40	23	41	75	15	46	17	27	16	0.722056	0.622599	0.722056	structural constituent of cytoskeleton
1619	100857247	ENSGALG00000000433	25	73	48	73	71	55	45	40	42	40	23	41	75	15	46	17	27	16	0.722056	0.622599	0.722056	microtubule
1620	100857247	ENSGALG00000000433	25	73	48	73	71	55	45	40	42	40	23	41	75	15	46	17	27	16	0.722056	0.622599	0.722056	cytoplasm
1621	100857247	ENSGALG00000000433	25	73	48	73	71	55	45	40	42	40	23	41	75	15	46	17	27	16	0.722056	0.622599	0.722056	microtubule cytoskeleton organization
1622	100857247	ENSGALG00000000433	25	73	48	73	71	55	45	40	42	40	23	41	75	15	46	17	27	16	0.722056	0.622599	0.722056	cytoskeleton
1623	100857247	ENSGALG00000000433	25	73	48	73	71	55	45	40	42	40	23	41	75	15	46	17	27	16	0.722056	0.622599	0.722056	GTPase activity
1624	100857247	ENSGALG00000000433	25	73	48	73	71	55	45	40	42	40	23	41	75	15	46	17	27	16	0.722056	0.622599	0.722056	GTP binding
1625	100857247	ENSGALG00000000433	25	73	48	73	71	55	45	40	42	40	23	41	75	15	46	17	27	16	0.722056	0.622599	0.722056	mitotic cell cycle
1626	100857247	ENSGALG00000000433	25	73	48	73	71	55	45	40	42	40	23	41	75	15	46	17	27	16	0.722056	0.622599	0.722056	microtubule-based process
1627	421170	ENSGALG00000000436	2355	2208	1987	2281	2469	2484	2207	1529	1745	2403	2028	1842	2108	2076	2088	2148	2172	2578	0.963959	0.999663	0.963959	membrane
1628	421170	ENSGALG00000000436	2355	2208	1987	2281	2469	2484	2207	1529	1745	2403	2028	1842	2108	2076	2088	2148	2172	2578	0.963959	0.999663	0.963959	cytosol
1629	421170	ENSGALG00000000436	2355	2208	1987	2281	2469	2484	2207	1529	1745	2403	2028	1842	2108	2076	2088	2148	2172	2578	0.963959	0.999663	0.963959	protein transport
1630	421170	ENSGALG00000000436	2355	2208	1987	2281	2469	2484	2207	1529	1745	2403	2028	1842	2108	2076	2088	2148	2172	2578	0.963959	0.999663	0.963959	guanyl-nucleotide exchange factor activity
1631	421170	ENSGALG00000000436	2355	2208	1987	2281	2469	2484	2207	1529	1745	2403	2028	1842	2108	2076	2088	2148	2172	2578	0.963959	0.999663	0.963959	small GTPase mediated signal transduction
1632	421170	ENSGALG00000000436	2355	2208	1987	2281	2469	2484	2207	1529	1745	2403	2028	1842	2108	2076	2088	2148	2172	2578	0.963959	0.999663	0.963959	zinc ion binding
1633	421170	ENSGALG00000000436	2355	2208	1987	2281	2469	2484	2207	1529	1745	2403	2028	1842	2108	2076	2088	2148	2172	2578	0.963959	0.999663	0.963959	post-Golgi vesicle-mediated transport
1634	395926	ENSGALG00000000437	0	0	1	0	0	0	0	0	0	0	0	0	0	0	0	0	0	0	NA	NA	NA	hydrolase activity
1635	395926	ENSGALG00000000437	0	0	1	0	0	0	0	0	0	0	0	0	0	0	0	0	0	0	NA	NA	NA	peptidase activity
1636	395926	ENSGALG00000000437	0	0	1	0	0	0	0	0	0	0	0	0	0	0	0	0	0	0	NA	NA	NA	proteolysis
1637	395926	ENSGALG00000000437	0	0	1	0	0	0	0	0	0	0	0	0	0	0	0	0	0	0	NA	NA	NA	aspartic-type endopeptidase activity
1638	395926	ENSGALG00000000437	0	0	1	0	0	0	0	0	0	0	0	0	0	0	0	0	0	0	NA	NA	NA	digestion
1639	426644	ENSGALG00000000438	140	118	152	150	93	117	318	397	292	121	161	292	286	226	274	216	197	230	0.515568	0.985893	0.515568	membrane
1640	426644	ENSGALG00000000438	140	118	152	150	93	117	318	397	292	121	161	292	286	226	274	216	197	230	0.515568	0.985893	0.515568	integral component of membrane
1641	426644	ENSGALG00000000438	140	118	152	150	93	117	318	397	292	121	161	292	286	226	274	216	197	230	0.515568	0.985893	0.515568	proteolysis
1642	395116	ENSGALG00000000441	0	0	2	0	0	0	0	0	0	0	1	0	0	0	0	0	0	0	NA	NA	NA	membrane
1643	395116	ENSGALG00000000441	0	0	2	0	0	0	0	0	0	0	1	0	0	0	0	0	0	0	NA	NA	NA	integral component of membrane
1644	395116	ENSGALG00000000441	0	0	2	0	0	0	0	0	0	0	1	0	0	0	0	0	0	0	NA	NA	NA	transmembrane transport
1645	395116	ENSGALG00000000441	0	0	2	0	0	0	0	0	0	0	1	0	0	0	0	0	0	0	NA	NA	NA	ion channel activity
1646	395116	ENSGALG00000000441	0	0	2	0	0	0	0	0	0	0	1	0	0	0	0	0	0	0	NA	NA	NA	voltage-gated ion channel activity
1647	395116	ENSGALG00000000441	0	0	2	0	0	0	0	0	0	0	1	0	0	0	0	0	0	0	NA	NA	NA	voltage-gated potassium channel activity
1648	395116	ENSGALG00000000441	0	0	2	0	0	0	0	0	0	0	1	0	0	0	0	0	0	0	NA	NA	NA	potassium channel activity
1649	395116	ENSGALG00000000441	0	0	2	0	0	0	0	0	0	0	1	0	0	0	0	0	0	0	NA	NA	NA	ion transport
1650	395116	ENSGALG00000000441	0	0	2	0	0	0	0	0	0	0	1	0	0	0	0	0	0	0	NA	NA	NA	potassium ion transport
1651	395116	ENSGALG00000000441	0	0	2	0	0	0	0	0	0	0	1	0	0	0	0	0	0	0	NA	NA	NA	regulation of ion transmembrane transport
1652	395116	ENSGALG00000000441	0	0	2	0	0	0	0	0	0	0	1	0	0	0	0	0	0	0	NA	NA	NA	potassium ion transmembrane transport
1653	395116	ENSGALG00000000441	0	0	2	0	0	0	0	0	0	0	1	0	0	0	0	0	0	0	NA	NA	NA	protein homooligomerization
1654	395116	ENSGALG00000000441	0	0	2	0	0	0	0	0	0	0	1	0	0	0	0	0	0	0	NA	NA	NA	voltage-gated potassium channel complex
1655	395116	ENSGALG00000000441	0	0	2	0	0	0	0	0	0	0	1	0	0	0	0	0	0	0	NA	NA	NA	delayed rectifier potassium channel activity
1656	395116	ENSGALG00000000441	0	0	2	0	0	0	0	0	0	0	1	0	0	0	0	0	0	0	NA	NA	NA	protein binding
1657	395117	ENSGALG00000000442	1	0	6	0	0	0	0	1	0	0	0	2	0	0	0	0	0	0	NA	NA	NA	membrane
1658	395117	ENSGALG00000000442	1	0	6	0	0	0	0	1	0	0	0	2	0	0	0	0	0	0	NA	NA	NA	integral component of membrane
1659	395117	ENSGALG00000000442	1	0	6	0	0	0	0	1	0	0	0	2	0	0	0	0	0	0	NA	NA	NA	transmembrane transport
1660	395117	ENSGALG00000000442	1	0	6	0	0	0	0	1	0	0	0	2	0	0	0	0	0	0	NA	NA	NA	dendrite
1661	395117	ENSGALG00000000442	1	0	6	0	0	0	0	1	0	0	0	2	0	0	0	0	0	0	NA	NA	NA	plasma membrane
1662	395117	ENSGALG00000000442	1	0	6	0	0	0	0	1	0	0	0	2	0	0	0	0	0	0	NA	NA	NA	ion channel activity
1663	395117	ENSGALG00000000442	1	0	6	0	0	0	0	1	0	0	0	2	0	0	0	0	0	0	NA	NA	NA	voltage-gated ion channel activity
1664	395117	ENSGALG00000000442	1	0	6	0	0	0	0	1	0	0	0	2	0	0	0	0	0	0	NA	NA	NA	voltage-gated potassium channel activity
1665	395117	ENSGALG00000000442	1	0	6	0	0	0	0	1	0	0	0	2	0	0	0	0	0	0	NA	NA	NA	potassium channel activity
1666	395117	ENSGALG00000000442	1	0	6	0	0	0	0	1	0	0	0	2	0	0	0	0	0	0	NA	NA	NA	ion transport
1667	395117	ENSGALG00000000442	1	0	6	0	0	0	0	1	0	0	0	2	0	0	0	0	0	0	NA	NA	NA	potassium ion transport
1668	395117	ENSGALG00000000442	1	0	6	0	0	0	0	1	0	0	0	2	0	0	0	0	0	0	NA	NA	NA	regulation of ion transmembrane transport
1669	395117	ENSGALG00000000442	1	0	6	0	0	0	0	1	0	0	0	2	0	0	0	0	0	0	NA	NA	NA	potassium ion transmembrane transport
1670	395117	ENSGALG00000000442	1	0	6	0	0	0	0	1	0	0	0	2	0	0	0	0	0	0	NA	NA	NA	protein homooligomerization
1671	395117	ENSGALG00000000442	1	0	6	0	0	0	0	1	0	0	0	2	0	0	0	0	0	0	NA	NA	NA	voltage-gated potassium channel complex
1672	395117	ENSGALG00000000442	1	0	6	0	0	0	0	1	0	0	0	2	0	0	0	0	0	0	NA	NA	NA	delayed rectifier potassium channel activity
1673	395117	ENSGALG00000000442	1	0	6	0	0	0	0	1	0	0	0	2	0	0	0	0	0	0	NA	NA	NA	axon terminus
1674	395117	ENSGALG00000000442	1	0	6	0	0	0	0	1	0	0	0	2	0	0	0	0	0	0	NA	NA	NA	regulation of dopamine secretion
1675	395117	ENSGALG00000000442	1	0	6	0	0	0	0	1	0	0	0	2	0	0	0	0	0	0	NA	NA	NA	optic nerve structural organization
1676	395117	ENSGALG00000000442	1	0	6	0	0	0	0	1	0	0	0	2	0	0	0	0	0	0	NA	NA	NA	regulation of circadian sleep/wake cycle, non-REM sleep
1677	395117	ENSGALG00000000442	1	0	6	0	0	0	0	1	0	0	0	2	0	0	0	0	0	0	NA	NA	NA	integral component of plasma membrane
1678	395117	ENSGALG00000000442	1	0	6	0	0	0	0	1	0	0	0	2	0	0	0	0	0	0	NA	NA	NA	axon
1679	395117	ENSGALG00000000442	1	0	6	0	0	0	0	1	0	0	0	2	0	0	0	0	0	0	NA	NA	NA	neuronal cell body membrane
1680	395117	ENSGALG00000000442	1	0	6	0	0	0	0	1	0	0	0	2	0	0	0	0	0	0	NA	NA	NA	perikaryon
1681	395117	ENSGALG00000000442	1	0	6	0	0	0	0	1	0	0	0	2	0	0	0	0	0	0	NA	NA	NA	juxtaparanode region of axon
1682	395117	ENSGALG00000000442	1	0	6	0	0	0	0	1	0	0	0	2	0	0	0	0	0	0	NA	NA	NA	protein binding
1683	769589	ENSGALG00000000451	0	0	0	0	0	0	0	1	0	0	0	0	0	0	0	0	0	0	NA	NA	NA	nucleus
1684	373904	ENSGALG00000000452	2928	2629	2298	2860	2844	2812	3125	2152	2336	3173	2797	2691	2744	2963	2404	2441	2560	2608	0.953339	0.934299	0.953339	TRAIL binding
1685	373904	ENSGALG00000000452	2928	2629	2298	2860	2844	2812	3125	2152	2336	3173	2797	2691	2744	2963	2404	2441	2560	2608	0.953339	0.934299	0.953339	membrane
1686	373904	ENSGALG00000000452	2928	2629	2298	2860	2844	2812	3125	2152	2336	3173	2797	2691	2744	2963	2404	2441	2560	2608	0.953339	0.934299	0.953339	integral component of membrane
1687	373904	ENSGALG00000000452	2928	2629	2298	2860	2844	2812	3125	2152	2336	3173	2797	2691	2744	2963	2404	2441	2560	2608	0.953339	0.934299	0.953339	signal transduction
1688	373904	ENSGALG00000000452	2928	2629	2298	2860	2844	2812	3125	2152	2336	3173	2797	2691	2744	2963	2404	2441	2560	2608	0.953339	0.934299	0.953339	plasma membrane
1689	373904	ENSGALG00000000452	2928	2629	2298	2860	2844	2812	3125	2152	2336	3173	2797	2691	2744	2963	2404	2441	2560	2608	0.953339	0.934299	0.953339	apoptotic process
1690	373904	ENSGALG00000000452	2928	2629	2298	2860	2844	2812	3125	2152	2336	3173	2797	2691	2744	2963	2404	2441	2560	2608	0.953339	0.934299	0.953339	protein binding
1691	373904	ENSGALG00000000452	2928	2629	2298	2860	2844	2812	3125	2152	2336	3173	2797	2691	2744	2963	2404	2441	2560	2608	0.953339	0.934299	0.953339	TRAIL-activated apoptotic signaling pathway
1692	373904	ENSGALG00000000452	2928	2629	2298	2860	2844	2812	3125	2152	2336	3173	2797	2691	2744	2963	2404	2441	2560	2608	0.953339	0.934299	0.953339	cell surface
1693	373904	ENSGALG00000000452	2928	2629	2298	2860	2844	2812	3125	2152	2336	3173	2797	2691	2744	2963	2404	2441	2560	2608	0.953339	0.934299	0.953339	positive regulation of apoptotic process
1694	428320	ENSGALG00000000458	0	0	0	3	0	0	1	0	0	0	0	1	0	1	1	0	0	0	NA	NA	NA	membrane
1695	428320	ENSGALG00000000458	0	0	0	3	0	0	1	0	0	0	0	1	0	1	1	0	0	0	NA	NA	NA	integral component of membrane
1696	428320	ENSGALG00000000458	0	0	0	3	0	0	1	0	0	0	0	1	0	1	1	0	0	0	NA	NA	NA	hydrolase activity
1697	428320	ENSGALG00000000458	0	0	0	3	0	0	1	0	0	0	0	1	0	1	1	0	0	0	NA	NA	NA	peptidase activity
1698	428320	ENSGALG00000000458	0	0	0	3	0	0	1	0	0	0	0	1	0	1	1	0	0	0	NA	NA	NA	proteolysis
1699	428320	ENSGALG00000000458	0	0	0	3	0	0	1	0	0	0	0	1	0	1	1	0	0	0	NA	NA	NA	serine-type endopeptidase activity
1700	428320	ENSGALG00000000458	0	0	0	3	0	0	1	0	0	0	0	1	0	1	1	0	0	0	NA	NA	NA	serine-type peptidase activity
1701	428320	ENSGALG00000000458	0	0	0	3	0	0	1	0	0	0	0	1	0	1	1	0	0	0	NA	NA	NA	protein binding
1702	419950	ENSGALG00000000461	304	31	157	130	76	49	44	128	23	116	125	357	12	44	63	24	34	16	0.203025	0.985468	0.203025	membrane
1703	419950	ENSGALG00000000461	304	31	157	130	76	49	44	128	23	116	125	357	12	44	63	24	34	16	0.203025	0.985468	0.203025	integral component of membrane
1704	419950	ENSGALG00000000461	304	31	157	130	76	49	44	128	23	116	125	357	12	44	63	24	34	16	0.203025	0.985468	0.203025	signaling receptor activity
1705	419950	ENSGALG00000000461	304	31	157	130	76	49	44	128	23	116	125	357	12	44	63	24	34	16	0.203025	0.985468	0.203025	endocytosis
1706	419950	ENSGALG00000000461	304	31	157	130	76	49	44	128	23	116	125	357	12	44	63	24	34	16	0.203025	0.985468	0.203025	carbohydrate binding
1707	419950	ENSGALG00000000461	304	31	157	130	76	49	44	128	23	116	125	357	12	44	63	24	34	16	0.203025	0.985468	0.203025	collagen binding
1708	419950	ENSGALG00000000461	304	31	157	130	76	49	44	128	23	116	125	357	12	44	63	24	34	16	0.203025	0.985468	0.203025	collagen catabolic process
1709	396460	ENSGALG00000000466	116	11	166	45	67	31	6	49	11	36	30	59	29	19	37	20	25	21	0.423956	0.956884	0.423956	nucleotide binding
1710	396460	ENSGALG00000000466	116	11	166	45	67	31	6	49	11	36	30	59	29	19	37	20	25	21	0.423956	0.956884	0.423956	ATP binding
1711	396460	ENSGALG00000000466	116	11	166	45	67	31	6	49	11	36	30	59	29	19	37	20	25	21	0.423956	0.956884	0.423956	kinase activity
1712	396460	ENSGALG00000000466	116	11	166	45	67	31	6	49	11	36	30	59	29	19	37	20	25	21	0.423956	0.956884	0.423956	transferase activity
1713	396460	ENSGALG00000000466	116	11	166	45	67	31	6	49	11	36	30	59	29	19	37	20	25	21	0.423956	0.956884	0.423956	phosphorylation
1714	396460	ENSGALG00000000466	116	11	166	45	67	31	6	49	11	36	30	59	29	19	37	20	25	21	0.423956	0.956884	0.423956	membrane
1715	396460	ENSGALG00000000466	116	11	166	45	67	31	6	49	11	36	30	59	29	19	37	20	25	21	0.423956	0.956884	0.423956	protein kinase activity
1716	396460	ENSGALG00000000466	116	11	166	45	67	31	6	49	11	36	30	59	29	19	37	20	25	21	0.423956	0.956884	0.423956	protein phosphorylation
1717	396460	ENSGALG00000000466	116	11	166	45	67	31	6	49	11	36	30	59	29	19	37	20	25	21	0.423956	0.956884	0.423956	protein tyrosine kinase activity
1718	396460	ENSGALG00000000466	116	11	166	45	67	31	6	49	11	36	30	59	29	19	37	20	25	21	0.423956	0.956884	0.423956	non-membrane spanning protein tyrosine kinase activity
1719	396460	ENSGALG00000000466	116	11	166	45	67	31	6	49	11	36	30	59	29	19	37	20	25	21	0.423956	0.956884	0.423956	signaling receptor binding
1720	396460	ENSGALG00000000466	116	11	166	45	67	31	6	49	11	36	30	59	29	19	37	20	25	21	0.423956	0.956884	0.423956	innate immune response
1721	396460	ENSGALG00000000466	116	11	166	45	67	31	6	49	11	36	30	59	29	19	37	20	25	21	0.423956	0.956884	0.423956	transmembrane receptor protein tyrosine kinase signaling pathway
1722	396460	ENSGALG00000000466	116	11	166	45	67	31	6	49	11	36	30	59	29	19	37	20	25	21	0.423956	0.956884	0.423956	plasma membrane
1723	396460	ENSGALG00000000466	116	11	166	45	67	31	6	49	11	36	30	59	29	19	37	20	25	21	0.423956	0.956884	0.423956	cytosol
1724	396460	ENSGALG00000000466	116	11	166	45	67	31	6	49	11	36	30	59	29	19	37	20	25	21	0.423956	0.956884	0.423956	protein dephosphorylation
1725	396460	ENSGALG00000000466	116	11	166	45	67	31	6	49	11	36	30	59	29	19	37	20	25	21	0.423956	0.956884	0.423956	cell differentiation
1726	396460	ENSGALG00000000466	116	11	166	45	67	31	6	49	11	36	30	59	29	19	37	20	25	21	0.423956	0.956884	0.423956	extrinsic component of cytoplasmic side of plasma membrane
1727	396460	ENSGALG00000000466	116	11	166	45	67	31	6	49	11	36	30	59	29	19	37	20	25	21	0.423956	0.956884	0.423956	regulation of cell population proliferation
1728	396460	ENSGALG00000000466	116	11	166	45	67	31	6	49	11	36	30	59	29	19	37	20	25	21	0.423956	0.956884	0.423956	B cell receptor signaling pathway
1729	396460	ENSGALG00000000466	116	11	166	45	67	31	6	49	11	36	30	59	29	19	37	20	25	21	0.423956	0.956884	0.423956	peptidyl-tyrosine autophosphorylation
1730	396460	ENSGALG00000000466	116	11	166	45	67	31	6	49	11	36	30	59	29	19	37	20	25	21	0.423956	0.956884	0.423956	T cell differentiation
1731	396460	ENSGALG00000000466	116	11	166	45	67	31	6	49	11	36	30	59	29	19	37	20	25	21	0.423956	0.956884	0.423956	phosphotyrosine residue binding
1732	396460	ENSGALG00000000466	116	11	166	45	67	31	6	49	11	36	30	59	29	19	37	20	25	21	0.423956	0.956884	0.423956	protein serine/threonine phosphatase activity
1733	396460	ENSGALG00000000466	116	11	166	45	67	31	6	49	11	36	30	59	29	19	37	20	25	21	0.423956	0.956884	0.423956	protein C-terminus binding
1734	396460	ENSGALG00000000466	116	11	166	45	67	31	6	49	11	36	30	59	29	19	37	20	25	21	0.423956	0.956884	0.423956	protein kinase binding
1735	396460	ENSGALG00000000466	116	11	166	45	67	31	6	49	11	36	30	59	29	19	37	20	25	21	0.423956	0.956884	0.423956	protein phosphatase binding
1736	396460	ENSGALG00000000466	116	11	166	45	67	31	6	49	11	36	30	59	29	19	37	20	25	21	0.423956	0.956884	0.423956	SH2 domain binding
1737	396460	ENSGALG00000000466	116	11	166	45	67	31	6	49	11	36	30	59	29	19	37	20	25	21	0.423956	0.956884	0.423956	T cell receptor binding
1738	396460	ENSGALG00000000466	116	11	166	45	67	31	6	49	11	36	30	59	29	19	37	20	25	21	0.423956	0.956884	0.423956	CD4 receptor binding
1739	396460	ENSGALG00000000466	116	11	166	45	67	31	6	49	11	36	30	59	29	19	37	20	25	21	0.423956	0.956884	0.423956	CD8 receptor binding
1740	396460	ENSGALG00000000466	116	11	166	45	67	31	6	49	11	36	30	59	29	19	37	20	25	21	0.423956	0.956884	0.423956	identical protein binding
1741	396460	ENSGALG00000000466	116	11	166	45	67	31	6	49	11	36	30	59	29	19	37	20	25	21	0.423956	0.956884	0.423956	phosphatidylinositol 3-kinase binding
1742	396460	ENSGALG00000000466	116	11	166	45	67	31	6	49	11	36	30	59	29	19	37	20	25	21	0.423956	0.956884	0.423956	ATPase binding
1743	396460	ENSGALG00000000466	116	11	166	45	67	31	6	49	11	36	30	59	29	19	37	20	25	21	0.423956	0.956884	0.423956	cellular zinc ion homeostasis
1744	396460	ENSGALG00000000466	116	11	166	45	67	31	6	49	11	36	30	59	29	19	37	20	25	21	0.423956	0.956884	0.423956	activation of cysteine-type endopeptidase activity involved in apoptotic process
1745	396460	ENSGALG00000000466	116	11	166	45	67	31	6	49	11	36	30	59	29	19	37	20	25	21	0.423956	0.956884	0.423956	peptidyl-tyrosine phosphorylation
1746	396460	ENSGALG00000000466	116	11	166	45	67	31	6	49	11	36	30	59	29	19	37	20	25	21	0.423956	0.956884	0.423956	positive regulation of heterotypic cell-cell adhesion
1747	396460	ENSGALG00000000466	116	11	166	45	67	31	6	49	11	36	30	59	29	19	37	20	25	21	0.423956	0.956884	0.423956	response to drug
1748	396460	ENSGALG00000000466	116	11	166	45	67	31	6	49	11	36	30	59	29	19	37	20	25	21	0.423956	0.956884	0.423956	positive regulation of T cell activation
1749	396460	ENSGALG00000000466	116	11	166	45	67	31	6	49	11	36	30	59	29	19	37	20	25	21	0.423956	0.956884	0.423956	positive regulation of leukocyte cell-cell adhesion
1750	396460	ENSGALG00000000466	116	11	166	45	67	31	6	49	11	36	30	59	29	19	37	20	25	21	0.423956	0.956884	0.423956	positive regulation of intrinsic apoptotic signaling pathway
1751	396460	ENSGALG00000000466	116	11	166	45	67	31	6	49	11	36	30	59	29	19	37	20	25	21	0.423956	0.956884	0.423956	pericentriolar material
1752	396460	ENSGALG00000000466	116	11	166	45	67	31	6	49	11	36	30	59	29	19	37	20	25	21	0.423956	0.956884	0.423956	immunological synapse
1753	396460	ENSGALG00000000466	116	11	166	45	67	31	6	49	11	36	30	59	29	19	37	20	25	21	0.423956	0.956884	0.423956	membrane raft
1754	396460	ENSGALG00000000466	116	11	166	45	67	31	6	49	11	36	30	59	29	19	37	20	25	21	0.423956	0.956884	0.423956	protein binding
1755	428203	ENSGALG00000000469	0	0	0	0	0	0	0	0	0	0	0	0	0	0	0	0	0	0	NA	NA	NA	membrane
1756	428203	ENSGALG00000000469	0	0	0	0	0	0	0	0	0	0	0	0	0	0	0	0	0	0	NA	NA	NA	integral component of membrane
1757	428203	ENSGALG00000000469	0	0	0	0	0	0	0	0	0	0	0	0	0	0	0	0	0	0	NA	NA	NA	G protein-coupled receptor activity
1758	428203	ENSGALG00000000469	0	0	0	0	0	0	0	0	0	0	0	0	0	0	0	0	0	0	NA	NA	NA	signal transduction
1759	428203	ENSGALG00000000469	0	0	0	0	0	0	0	0	0	0	0	0	0	0	0	0	0	0	NA	NA	NA	G protein-coupled receptor signaling pathway
1760	428203	ENSGALG00000000469	0	0	0	0	0	0	0	0	0	0	0	0	0	0	0	0	0	0	NA	NA	NA	integral component of plasma membrane
1761	428203	ENSGALG00000000469	0	0	0	0	0	0	0	0	0	0	0	0	0	0	0	0	0	0	NA	NA	NA	nucleus
1762	428203	ENSGALG00000000469	0	0	0	0	0	0	0	0	0	0	0	0	0	0	0	0	0	0	NA	NA	NA	phospholipase C-activating G protein-coupled receptor signaling pathway
1763	428203	ENSGALG00000000469	0	0	0	0	0	0	0	0	0	0	0	0	0	0	0	0	0	0	NA	NA	NA	plasma membrane
1764	428203	ENSGALG00000000469	0	0	0	0	0	0	0	0	0	0	0	0	0	0	0	0	0	0	NA	NA	NA	cytoplasm
1765	428203	ENSGALG00000000469	0	0	0	0	0	0	0	0	0	0	0	0	0	0	0	0	0	0	NA	NA	NA	positive regulation of MAPK cascade
1766	428203	ENSGALG00000000469	0	0	0	0	0	0	0	0	0	0	0	0	0	0	0	0	0	0	NA	NA	NA	positive regulation of vasoconstriction
1767	428203	ENSGALG00000000469	0	0	0	0	0	0	0	0	0	0	0	0	0	0	0	0	0	0	NA	NA	NA	regulation of muscle contraction
1768	428203	ENSGALG00000000469	0	0	0	0	0	0	0	0	0	0	0	0	0	0	0	0	0	0	NA	NA	NA	positive regulation of cytosolic calcium ion concentration
1769	428203	ENSGALG00000000469	0	0	0	0	0	0	0	0	0	0	0	0	0	0	0	0	0	0	NA	NA	NA	cell-cell signaling
1770	428203	ENSGALG00000000469	0	0	0	0	0	0	0	0	0	0	0	0	0	0	0	0	0	0	NA	NA	NA	adrenergic receptor activity
1771	428203	ENSGALG00000000469	0	0	0	0	0	0	0	0	0	0	0	0	0	0	0	0	0	0	NA	NA	NA	adenylate cyclase-activating adrenergic receptor signaling pathway
1772	428203	ENSGALG00000000469	0	0	0	0	0	0	0	0	0	0	0	0	0	0	0	0	0	0	NA	NA	NA	alpha1-adrenergic receptor activity
1773	428203	ENSGALG00000000469	0	0	0	0	0	0	0	0	0	0	0	0	0	0	0	0	0	0	NA	NA	NA	regulation of vasoconstriction
1774	428203	ENSGALG00000000469	0	0	0	0	0	0	0	0	0	0	0	0	0	0	0	0	0	0	NA	NA	NA	nuclear membrane
1775	428203	ENSGALG00000000469	0	0	0	0	0	0	0	0	0	0	0	0	0	0	0	0	0	0	NA	NA	NA	caveola
1776	428203	ENSGALG00000000469	0	0	0	0	0	0	0	0	0	0	0	0	0	0	0	0	0	0	NA	NA	NA	regulation of cardiac muscle contraction
1777	428203	ENSGALG00000000469	0	0	0	0	0	0	0	0	0	0	0	0	0	0	0	0	0	0	NA	NA	NA	positive regulation of heart rate by epinephrine-norepinephrine
1778	428203	ENSGALG00000000469	0	0	0	0	0	0	0	0	0	0	0	0	0	0	0	0	0	0	NA	NA	NA	protein heterodimerization activity
1779	428203	ENSGALG00000000469	0	0	0	0	0	0	0	0	0	0	0	0	0	0	0	0	0	0	NA	NA	NA	negative regulation of heart rate involved in baroreceptor response to increased systemic arterial blood pressure
1780	428203	ENSGALG00000000469	0	0	0	0	0	0	0	0	0	0	0	0	0	0	0	0	0	0	NA	NA	NA	norepinephrine-epinephrine vasoconstriction involved in regulation of systemic arterial blood pressure
1781	428203	ENSGALG00000000469	0	0	0	0	0	0	0	0	0	0	0	0	0	0	0	0	0	0	NA	NA	NA	positive regulation of the force of heart contraction by epinephrine-norepinephrine
1782	428203	ENSGALG00000000469	0	0	0	0	0	0	0	0	0	0	0	0	0	0	0	0	0	0	NA	NA	NA	adult heart development
1783	428203	ENSGALG00000000469	0	0	0	0	0	0	0	0	0	0	0	0	0	0	0	0	0	0	NA	NA	NA	negative regulation of autophagy
1784	428203	ENSGALG00000000469	0	0	0	0	0	0	0	0	0	0	0	0	0	0	0	0	0	0	NA	NA	NA	positive regulation of cardiac muscle hypertrophy
1785	428203	ENSGALG00000000469	0	0	0	0	0	0	0	0	0	0	0	0	0	0	0	0	0	0	NA	NA	NA	organ growth
1786	428203	ENSGALG00000000469	0	0	0	0	0	0	0	0	0	0	0	0	0	0	0	0	0	0	NA	NA	NA	positive regulation of smooth muscle contraction
1787	428203	ENSGALG00000000469	0	0	0	0	0	0	0	0	0	0	0	0	0	0	0	0	0	0	NA	NA	NA	cell growth involved in cardiac muscle cell development
1788	428203	ENSGALG00000000469	0	0	0	0	0	0	0	0	0	0	0	0	0	0	0	0	0	0	NA	NA	NA	neuron-glial cell signaling
1789	428203	ENSGALG00000000469	0	0	0	0	0	0	0	0	0	0	0	0	0	0	0	0	0	0	NA	NA	NA	positive regulation of non-membrane spanning protein tyrosine kinase activity
1790	428203	ENSGALG00000000469	0	0	0	0	0	0	0	0	0	0	0	0	0	0	0	0	0	0	NA	NA	NA	pilomotor reflex
1791	396222	ENSGALG00000000470	43	26	45	25	42	28	22	47	28	32	16	24	23	44	43	34	32	29	0.951067	0.996456	0.951067	intermediate filament
1792	396222	ENSGALG00000000470	43	26	45	25	42	28	22	47	28	32	16	24	23	44	43	34	32	29	0.951067	0.996456	0.951067	nucleus
1793	396222	ENSGALG00000000470	43	26	45	25	42	28	22	47	28	32	16	24	23	44	43	34	32	29	0.951067	0.996456	0.951067	nuclear envelope
1794	396222	ENSGALG00000000470	43	26	45	25	42	28	22	47	28	32	16	24	23	44	43	34	32	29	0.951067	0.996456	0.951067	lamin filament
1795	396222	ENSGALG00000000470	43	26	45	25	42	28	22	47	28	32	16	24	23	44	43	34	32	29	0.951067	0.996456	0.951067	nuclear membrane
1796	396222	ENSGALG00000000470	43	26	45	25	42	28	22	47	28	32	16	24	23	44	43	34	32	29	0.951067	0.996456	0.951067	identical protein binding
1797	373936	ENSGALG00000000474	246	223	275	214	165	298	439	347	435	212	330	449	291	346	229	277	270	265	0.912898	0.993374	0.912898	cytoplasm
1798	373936	ENSGALG00000000474	246	223	275	214	165	298	439	347	435	212	330	449	291	346	229	277	270	265	0.912898	0.993374	0.912898	cytosol
1799	373936	ENSGALG00000000474	246	223	275	214	165	298	439	347	435	212	330	449	291	346	229	277	270	265	0.912898	0.993374	0.912898	structural constituent of ribosome
1800	373936	ENSGALG00000000474	246	223	275	214	165	298	439	347	435	212	330	449	291	346	229	277	270	265	0.912898	0.993374	0.912898	translation
1801	373936	ENSGALG00000000474	246	223	275	214	165	298	439	347	435	212	330	449	291	346	229	277	270	265	0.912898	0.993374	0.912898	ribosome
1802	373936	ENSGALG00000000474	246	223	275	214	165	298	439	347	435	212	330	449	291	346	229	277	270	265	0.912898	0.993374	0.912898	cytosolic large ribosomal subunit
1803	373936	ENSGALG00000000474	246	223	275	214	165	298	439	347	435	212	330	449	291	346	229	277	270	265	0.912898	0.993374	0.912898	cytoplasmic translation
1804	373936	ENSGALG00000000474	246	223	275	214	165	298	439	347	435	212	330	449	291	346	229	277	270	265	0.912898	0.993374	0.912898	nucleolus
1805	373936	ENSGALG00000000474	246	223	275	214	165	298	439	347	435	212	330	449	291	346	229	277	270	265	0.912898	0.993374	0.912898	polysomal ribosome
1806	419539	ENSGALG00000000476	0	0	0	0	0	0	0	0	0	0	0	0	0	0	0	0	0	0	NA	NA	NA	membrane
1807	419539	ENSGALG00000000476	0	0	0	0	0	0	0	0	0	0	0	0	0	0	0	0	0	0	NA	NA	NA	integral component of membrane
1808	419539	ENSGALG00000000476	0	0	0	0	0	0	0	0	0	0	0	0	0	0	0	0	0	0	NA	NA	NA	extracellular space
1809	419539	ENSGALG00000000476	0	0	0	0	0	0	0	0	0	0	0	0	0	0	0	0	0	0	NA	NA	NA	extracellular matrix
1810	419539	ENSGALG00000000476	0	0	0	0	0	0	0	0	0	0	0	0	0	0	0	0	0	0	NA	NA	NA	protein binding
1811	419951	ENSGALG00000000478	5	1	11	1	0	21	11	16	2	5	23	45	11	0	11	1	0	12	0.91632	0.964461	0.91632	dendritic spine
1812	419951	ENSGALG00000000478	5	1	11	1	0	21	11	16	2	5	23	45	11	0	11	1	0	12	0.91632	0.964461	0.91632	protein binding
1813	419951	ENSGALG00000000478	5	1	11	1	0	21	11	16	2	5	23	45	11	0	11	1	0	12	0.91632	0.964461	0.91632	in utero embryonic development
1814	419812	ENSGALG00000000497	0	0	3	0	4	0	1	2	0	0	1	0	3	0	0	0	0	0	NA	NA	NA	regulation of apoptotic process
1815	419812	ENSGALG00000000497	0	0	3	0	4	0	1	2	0	0	1	0	3	0	0	0	0	0	NA	NA	NA	regulation of extrinsic apoptotic signaling pathway
1816	419953	ENSGALG00000000498	0	0	0	0	0	0	0	0	0	0	0	0	0	0	0	0	0	0	NA	NA	NA	membrane
1817	419953	ENSGALG00000000498	0	0	0	0	0	0	0	0	0	0	0	0	0	0	0	0	0	0	NA	NA	NA	integral component of membrane
1818	419953	ENSGALG00000000498	0	0	0	0	0	0	0	0	0	0	0	0	0	0	0	0	0	0	NA	NA	NA	extracellular space
1819	419953	ENSGALG00000000498	0	0	0	0	0	0	0	0	0	0	0	0	0	0	0	0	0	0	NA	NA	NA	metal ion binding
1820	419953	ENSGALG00000000498	0	0	0	0	0	0	0	0	0	0	0	0	0	0	0	0	0	0	NA	NA	NA	hydrolase activity
1821	419953	ENSGALG00000000498	0	0	0	0	0	0	0	0	0	0	0	0	0	0	0	0	0	0	NA	NA	NA	peptidase activity
1822	419953	ENSGALG00000000498	0	0	0	0	0	0	0	0	0	0	0	0	0	0	0	0	0	0	NA	NA	NA	proteolysis
1823	419953	ENSGALG00000000498	0	0	0	0	0	0	0	0	0	0	0	0	0	0	0	0	0	0	NA	NA	NA	metallopeptidase activity
1824	419953	ENSGALG00000000498	0	0	0	0	0	0	0	0	0	0	0	0	0	0	0	0	0	0	NA	NA	NA	carboxypeptidase activity
1825	419953	ENSGALG00000000498	0	0	0	0	0	0	0	0	0	0	0	0	0	0	0	0	0	0	NA	NA	NA	cell population proliferation
1826	419953	ENSGALG00000000498	0	0	0	0	0	0	0	0	0	0	0	0	0	0	0	0	0	0	NA	NA	NA	actin binding
1827	419953	ENSGALG00000000498	0	0	0	0	0	0	0	0	0	0	0	0	0	0	0	0	0	0	NA	NA	NA	peptidyl-dipeptidase activity
1828	419953	ENSGALG00000000498	0	0	0	0	0	0	0	0	0	0	0	0	0	0	0	0	0	0	NA	NA	NA	kidney development
1829	419953	ENSGALG00000000498	0	0	0	0	0	0	0	0	0	0	0	0	0	0	0	0	0	0	NA	NA	NA	plasma membrane
1830	419953	ENSGALG00000000498	0	0	0	0	0	0	0	0	0	0	0	0	0	0	0	0	0	0	NA	NA	NA	zinc ion binding
1831	419953	ENSGALG00000000498	0	0	0	0	0	0	0	0	0	0	0	0	0	0	0	0	0	0	NA	NA	NA	drug binding
1832	419953	ENSGALG00000000498	0	0	0	0	0	0	0	0	0	0	0	0	0	0	0	0	0	0	NA	NA	NA	endopeptidase activity
1833	419953	ENSGALG00000000498	0	0	0	0	0	0	0	0	0	0	0	0	0	0	0	0	0	0	NA	NA	NA	exopeptidase activity
1834	419953	ENSGALG00000000498	0	0	0	0	0	0	0	0	0	0	0	0	0	0	0	0	0	0	NA	NA	NA	tripeptidyl-peptidase activity
1835	419953	ENSGALG00000000498	0	0	0	0	0	0	0	0	0	0	0	0	0	0	0	0	0	0	NA	NA	NA	chloride ion binding
1836	419953	ENSGALG00000000498	0	0	0	0	0	0	0	0	0	0	0	0	0	0	0	0	0	0	NA	NA	NA	mitogen-activated protein kinase kinase binding
1837	419953	ENSGALG00000000498	0	0	0	0	0	0	0	0	0	0	0	0	0	0	0	0	0	0	NA	NA	NA	bradykinin receptor binding
1838	419953	ENSGALG00000000498	0	0	0	0	0	0	0	0	0	0	0	0	0	0	0	0	0	0	NA	NA	NA	mitogen-activated protein kinase binding
1839	419953	ENSGALG00000000498	0	0	0	0	0	0	0	0	0	0	0	0	0	0	0	0	0	0	NA	NA	NA	metallodipeptidase activity
1840	419953	ENSGALG00000000498	0	0	0	0	0	0	0	0	0	0	0	0	0	0	0	0	0	0	NA	NA	NA	regulation of systemic arterial blood pressure by renin-angiotensin
1841	419953	ENSGALG00000000498	0	0	0	0	0	0	0	0	0	0	0	0	0	0	0	0	0	0	NA	NA	NA	hormone catabolic process
1842	419953	ENSGALG00000000498	0	0	0	0	0	0	0	0	0	0	0	0	0	0	0	0	0	0	NA	NA	NA	peptide catabolic process
1843	419953	ENSGALG00000000498	0	0	0	0	0	0	0	0	0	0	0	0	0	0	0	0	0	0	NA	NA	NA	amyloid-beta metabolic process
1844	419953	ENSGALG00000000498	0	0	0	0	0	0	0	0	0	0	0	0	0	0	0	0	0	0	NA	NA	NA	arachidonic acid secretion
1845	419953	ENSGALG00000000498	0	0	0	0	0	0	0	0	0	0	0	0	0	0	0	0	0	0	NA	NA	NA	regulation of angiotensin metabolic process
1846	419953	ENSGALG00000000498	0	0	0	0	0	0	0	0	0	0	0	0	0	0	0	0	0	0	NA	NA	NA	primitive erythrocyte differentiation
1847	419953	ENSGALG00000000498	0	0	0	0	0	0	0	0	0	0	0	0	0	0	0	0	0	0	NA	NA	NA	lysosome
1848	419953	ENSGALG00000000498	0	0	0	0	0	0	0	0	0	0	0	0	0	0	0	0	0	0	NA	NA	NA	endosome
1849	419953	ENSGALG00000000498	0	0	0	0	0	0	0	0	0	0	0	0	0	0	0	0	0	0	NA	NA	NA	external side of plasma membrane
1850	419953	ENSGALG00000000498	0	0	0	0	0	0	0	0	0	0	0	0	0	0	0	0	0	0	NA	NA	NA	extracellular exosome
1851	419813	ENSGALG00000000504	2	1	1	4	0	2	1	1	5	2	0	2	3	0	0	1	1	0	NA	NA	NA	host cell nucleus
1852	419813	ENSGALG00000000504	2	1	1	4	0	2	1	1	5	2	0	2	3	0	0	1	1	0	NA	NA	NA	nucleus
1853	419813	ENSGALG00000000504	2	1	1	4	0	2	1	1	5	2	0	2	3	0	0	1	1	0	NA	NA	NA	DNA binding
1854	419813	ENSGALG00000000504	2	1	1	4	0	2	1	1	5	2	0	2	3	0	0	1	1	0	NA	NA	NA	regulation of transcription by RNA polymerase II
1855	419813	ENSGALG00000000504	2	1	1	4	0	2	1	1	5	2	0	2	3	0	0	1	1	0	NA	NA	NA	regulation of transcription, DNA-templated
1856	419813	ENSGALG00000000504	2	1	1	4	0	2	1	1	5	2	0	2	3	0	0	1	1	0	NA	NA	NA	DNA-binding transcription factor activity
1857	419813	ENSGALG00000000504	2	1	1	4	0	2	1	1	5	2	0	2	3	0	0	1	1	0	NA	NA	NA	sequence-specific DNA binding
1858	419813	ENSGALG00000000504	2	1	1	4	0	2	1	1	5	2	0	2	3	0	0	1	1	0	NA	NA	NA	DNA-binding transcription factor activity, RNA polymerase II-specific
1859	419813	ENSGALG00000000504	2	1	1	4	0	2	1	1	5	2	0	2	3	0	0	1	1	0	NA	NA	NA	cell differentiation
1860	419813	ENSGALG00000000504	2	1	1	4	0	2	1	1	5	2	0	2	3	0	0	1	1	0	NA	NA	NA	RNA polymerase II regulatory region sequence-specific DNA binding
1861	419813	ENSGALG00000000504	2	1	1	4	0	2	1	1	5	2	0	2	3	0	0	1	1	0	NA	NA	NA	DNA-binding transcription repressor activity, RNA polymerase II-specific
1862	419813	ENSGALG00000000504	2	1	1	4	0	2	1	1	5	2	0	2	3	0	0	1	1	0	NA	NA	NA	negative regulation of transcription by RNA polymerase II
1863	419813	ENSGALG00000000504	2	1	1	4	0	2	1	1	5	2	0	2	3	0	0	1	1	0	NA	NA	NA	nucleoplasm
1864	419813	ENSGALG00000000504	2	1	1	4	0	2	1	1	5	2	0	2	3	0	0	1	1	0	NA	NA	NA	sequence-specific double-stranded DNA binding
1865	414871	ENSGALG00000000505	0	0	0	0	0	0	0	0	0	0	0	0	0	0	0	0	0	0	NA	NA	NA	membrane
1866	414871	ENSGALG00000000505	0	0	0	0	0	0	0	0	0	0	0	0	0	0	0	0	0	0	NA	NA	NA	integral component of membrane
1867	414871	ENSGALG00000000505	0	0	0	0	0	0	0	0	0	0	0	0	0	0	0	0	0	0	NA	NA	NA	transmembrane transport
1868	414871	ENSGALG00000000505	0	0	0	0	0	0	0	0	0	0	0	0	0	0	0	0	0	0	NA	NA	NA	ion channel activity
1869	414871	ENSGALG00000000505	0	0	0	0	0	0	0	0	0	0	0	0	0	0	0	0	0	0	NA	NA	NA	voltage-gated ion channel activity
1870	414871	ENSGALG00000000505	0	0	0	0	0	0	0	0	0	0	0	0	0	0	0	0	0	0	NA	NA	NA	voltage-gated potassium channel activity
1871	414871	ENSGALG00000000505	0	0	0	0	0	0	0	0	0	0	0	0	0	0	0	0	0	0	NA	NA	NA	potassium channel activity
1872	414871	ENSGALG00000000505	0	0	0	0	0	0	0	0	0	0	0	0	0	0	0	0	0	0	NA	NA	NA	ion transport
1873	414871	ENSGALG00000000505	0	0	0	0	0	0	0	0	0	0	0	0	0	0	0	0	0	0	NA	NA	NA	potassium ion transport
1874	414871	ENSGALG00000000505	0	0	0	0	0	0	0	0	0	0	0	0	0	0	0	0	0	0	NA	NA	NA	regulation of ion transmembrane transport
1875	414871	ENSGALG00000000505	0	0	0	0	0	0	0	0	0	0	0	0	0	0	0	0	0	0	NA	NA	NA	potassium ion transmembrane transport
1876	414871	ENSGALG00000000505	0	0	0	0	0	0	0	0	0	0	0	0	0	0	0	0	0	0	NA	NA	NA	integral component of plasma membrane
1877	414871	ENSGALG00000000505	0	0	0	0	0	0	0	0	0	0	0	0	0	0	0	0	0	0	NA	NA	NA	regulation of membrane potential
1878	415851	ENSGALG00000000507	10	7	6	4	16	5	8	6	5	7	6	10	0	13	6	7	26	6	0.983242	0.956479	0.983242	plasma membrane
1879	415851	ENSGALG00000000507	10	7	6	4	16	5	8	6	5	7	6	10	0	13	6	7	26	6	0.983242	0.956479	0.983242	calcium-dependent phospholipid binding
1880	415851	ENSGALG00000000507	10	7	6	4	16	5	8	6	5	7	6	10	0	13	6	7	26	6	0.983242	0.956479	0.983242	cellular response to calcium ion
1881	415851	ENSGALG00000000507	10	7	6	4	16	5	8	6	5	7	6	10	0	13	6	7	26	6	0.983242	0.956479	0.983242	nucleus
1882	415851	ENSGALG00000000507	10	7	6	4	16	5	8	6	5	7	6	10	0	13	6	7	26	6	0.983242	0.956479	0.983242	cytoplasm
1883	771554	ENSGALG00000000510	265	205	329	251	317	214	173	214	207	239	213	231	281	194	185	228	195	209	0.843303	0.995753	0.843303	nucleus
1884	771554	ENSGALG00000000510	265	205	329	251	317	214	173	214	207	239	213	231	281	194	185	228	195	209	0.843303	0.995753	0.843303	nucleoplasm
1885	771554	ENSGALG00000000510	265	205	329	251	317	214	173	214	207	239	213	231	281	194	185	228	195	209	0.843303	0.995753	0.843303	cytosol
1886	771554	ENSGALG00000000510	265	205	329	251	317	214	173	214	207	239	213	231	281	194	185	228	195	209	0.843303	0.995753	0.843303	nuclear matrix
1887	771554	ENSGALG00000000510	265	205	329	251	317	214	173	214	207	239	213	231	281	194	185	228	195	209	0.843303	0.995753	0.843303	nuclear body
1888	771554	ENSGALG00000000510	265	205	329	251	317	214	173	214	207	239	213	231	281	194	185	228	195	209	0.843303	0.995753	0.843303	protein-containing complex
1889	771554	ENSGALG00000000510	265	205	329	251	317	214	173	214	207	239	213	231	281	194	185	228	195	209	0.843303	0.995753	0.843303	Cul4-RING E3 ubiquitin ligase complex
1890	771554	ENSGALG00000000510	265	205	329	251	317	214	173	214	207	239	213	231	281	194	185	228	195	209	0.843303	0.995753	0.843303	protein binding
1891	419814	ENSGALG00000000511	3080	4194	3205	5219	3713	3470	6678	4514	5721	4075	5463	4870	5294	5104	4645	3013	3970	4354	0.479497	0.640767	0.479497	cytoplasm
1892	419814	ENSGALG00000000511	3080	4194	3205	5219	3713	3470	6678	4514	5721	4075	5463	4870	5294	5104	4645	3013	3970	4354	0.479497	0.640767	0.479497	protein binding
1893	419814	ENSGALG00000000511	3080	4194	3205	5219	3713	3470	6678	4514	5721	4075	5463	4870	5294	5104	4645	3013	3970	4354	0.479497	0.640767	0.479497	positive regulation of phosphorylation
1894	419814	ENSGALG00000000511	3080	4194	3205	5219	3713	3470	6678	4514	5721	4075	5463	4870	5294	5104	4645	3013	3970	4354	0.479497	0.640767	0.479497	identical protein binding
1895	415853	ENSGALG00000000513	574	613	510	501	582	666	732	525	564	620	542	464	554	562	576	673	715	699	0.765743	0.924628	0.765743	metal ion binding
1896	415853	ENSGALG00000000513	574	613	510	501	582	666	732	525	564	620	542	464	554	562	576	673	715	699	0.765743	0.924628	0.765743	DNA-binding transcription factor activity
1897	415853	ENSGALG00000000513	574	613	510	501	582	666	732	525	564	620	542	464	554	562	576	673	715	699	0.765743	0.924628	0.765743	positive regulation of transcription by RNA polymerase II
1898	415853	ENSGALG00000000513	574	613	510	501	582	666	732	525	564	620	542	464	554	562	576	673	715	699	0.765743	0.924628	0.765743	nucleus
1899	415853	ENSGALG00000000513	574	613	510	501	582	666	732	525	564	620	542	464	554	562	576	673	715	699	0.765743	0.924628	0.765743	nucleoplasm
1900	415853	ENSGALG00000000513	574	613	510	501	582	666	732	525	564	620	542	464	554	562	576	673	715	699	0.765743	0.924628	0.765743	zinc ion binding
1901	415853	ENSGALG00000000513	574	613	510	501	582	666	732	525	564	620	542	464	554	562	576	673	715	699	0.765743	0.924628	0.765743	transcription regulatory region sequence-specific DNA binding
1902	415853	ENSGALG00000000513	574	613	510	501	582	666	732	525	564	620	542	464	554	562	576	673	715	699	0.765743	0.924628	0.765743	kinetochore
1903	415853	ENSGALG00000000513	574	613	510	501	582	666	732	525	564	620	542	464	554	562	576	673	715	699	0.765743	0.924628	0.765743	nucleic acid binding
1904	415853	ENSGALG00000000513	574	613	510	501	582	666	732	525	564	620	542	464	554	562	576	673	715	699	0.765743	0.924628	0.765743	sequence-specific double-stranded DNA binding
1905	415854	ENSGALG00000000516	8	2	3	4	5	6	11	6	7	5	6	7	3	6	0	4	2	3	0.902007	0.99066	0.902007	interstrand cross-link repair
1906	415854	ENSGALG00000000516	8	2	3	4	5	6	11	6	7	5	6	7	3	6	0	4	2	3	0.902007	0.99066	0.902007	Fanconi anaemia nuclear complex
1907	415854	ENSGALG00000000516	8	2	3	4	5	6	11	6	7	5	6	7	3	6	0	4	2	3	0.902007	0.99066	0.902007	male meiotic nuclear division
1908	415854	ENSGALG00000000516	8	2	3	4	5	6	11	6	7	5	6	7	3	6	0	4	2	3	0.902007	0.99066	0.902007	male gonad development
1909	415854	ENSGALG00000000516	8	2	3	4	5	6	11	6	7	5	6	7	3	6	0	4	2	3	0.902007	0.99066	0.902007	female gonad development
1910	415854	ENSGALG00000000516	8	2	3	4	5	6	11	6	7	5	6	7	3	6	0	4	2	3	0.902007	0.99066	0.902007	regulation of cell population proliferation
1911	415854	ENSGALG00000000516	8	2	3	4	5	6	11	6	7	5	6	7	3	6	0	4	2	3	0.902007	0.99066	0.902007	regulation of regulatory T cell differentiation
1912	415854	ENSGALG00000000516	8	2	3	4	5	6	11	6	7	5	6	7	3	6	0	4	2	3	0.902007	0.99066	0.902007	regulation of inflammatory response
1913	415854	ENSGALG00000000516	8	2	3	4	5	6	11	6	7	5	6	7	3	6	0	4	2	3	0.902007	0.99066	0.902007	regulation of DNA-binding transcription factor activity
1914	415854	ENSGALG00000000516	8	2	3	4	5	6	11	6	7	5	6	7	3	6	0	4	2	3	0.902007	0.99066	0.902007	regulation of CD40 signaling pathway
1915	415854	ENSGALG00000000516	8	2	3	4	5	6	11	6	7	5	6	7	3	6	0	4	2	3	0.902007	0.99066	0.902007	nucleus
1916	415854	ENSGALG00000000516	8	2	3	4	5	6	11	6	7	5	6	7	3	6	0	4	2	3	0.902007	0.99066	0.902007	nucleoplasm
1917	415855	ENSGALG00000000521	0	0	3	0	0	0	1	0	0	0	0	1	0	1	0	4	2	0	NA	NA	NA	membrane
1918	415855	ENSGALG00000000521	0	0	3	0	0	0	1	0	0	0	0	1	0	1	0	4	2	0	NA	NA	NA	plasma membrane
1919	415855	ENSGALG00000000521	0	0	3	0	0	0	1	0	0	0	0	1	0	1	0	4	2	0	NA	NA	NA	cytoplasm
1920	415855	ENSGALG00000000521	0	0	3	0	0	0	1	0	0	0	0	1	0	1	0	4	2	0	NA	NA	NA	actin binding
1921	415855	ENSGALG00000000521	0	0	3	0	0	0	1	0	0	0	0	1	0	1	0	4	2	0	NA	NA	NA	cytoskeleton
1922	415855	ENSGALG00000000521	0	0	3	0	0	0	1	0	0	0	0	1	0	1	0	4	2	0	NA	NA	NA	protein transport
1923	415855	ENSGALG00000000521	0	0	3	0	0	0	1	0	0	0	0	1	0	1	0	4	2	0	NA	NA	NA	vesicle-mediated transport
1924	415855	ENSGALG00000000521	0	0	3	0	0	0	1	0	0	0	0	1	0	1	0	4	2	0	NA	NA	NA	cytoplasmic vesicle membrane
1925	415855	ENSGALG00000000521	0	0	3	0	0	0	1	0	0	0	0	1	0	1	0	4	2	0	NA	NA	NA	actin nucleation
1926	415855	ENSGALG00000000521	0	0	3	0	0	0	1	0	0	0	0	1	0	1	0	4	2	0	NA	NA	NA	actin cytoskeleton organization
1927	415855	ENSGALG00000000521	0	0	3	0	0	0	1	0	0	0	0	1	0	1	0	4	2	0	NA	NA	NA	cleavage furrow formation
1928	415855	ENSGALG00000000521	0	0	3	0	0	0	1	0	0	0	0	1	0	1	0	4	2	0	NA	NA	NA	polar body extrusion after meiotic divisions
1929	415855	ENSGALG00000000521	0	0	3	0	0	0	1	0	0	0	0	1	0	1	0	4	2	0	NA	NA	NA	intracellular transport
1930	415855	ENSGALG00000000521	0	0	3	0	0	0	1	0	0	0	0	1	0	1	0	4	2	0	NA	NA	NA	establishment of meiotic spindle localization
1931	415855	ENSGALG00000000521	0	0	3	0	0	0	1	0	0	0	0	1	0	1	0	4	2	0	NA	NA	NA	formin-nucleated actin cable assembly
1932	415855	ENSGALG00000000521	0	0	3	0	0	0	1	0	0	0	0	1	0	1	0	4	2	0	NA	NA	NA	positive regulation of double-strand break repair
1933	415855	ENSGALG00000000521	0	0	3	0	0	0	1	0	0	0	0	1	0	1	0	4	2	0	NA	NA	NA	cell cortex
1934	415855	ENSGALG00000000521	0	0	3	0	0	0	1	0	0	0	0	1	0	1	0	4	2	0	NA	NA	NA	cleavage furrow
1935	415855	ENSGALG00000000521	0	0	3	0	0	0	1	0	0	0	0	1	0	1	0	4	2	0	NA	NA	NA	cytoplasmic vesicle
1936	428260	ENSGALG00000000523	1103	1269	1205	1308	1374	1076	1873	1249	1294	1109	1273	1090	1256	1187	1296	947	1121	1090	0.423956	0.880606	0.423956	nucleotide binding
1937	428260	ENSGALG00000000523	1103	1269	1205	1308	1374	1076	1873	1249	1294	1109	1273	1090	1256	1187	1296	947	1121	1090	0.423956	0.880606	0.423956	ATP binding
1938	428260	ENSGALG00000000523	1103	1269	1205	1308	1374	1076	1873	1249	1294	1109	1273	1090	1256	1187	1296	947	1121	1090	0.423956	0.880606	0.423956	kinase activity
1939	428260	ENSGALG00000000523	1103	1269	1205	1308	1374	1076	1873	1249	1294	1109	1273	1090	1256	1187	1296	947	1121	1090	0.423956	0.880606	0.423956	transferase activity
1940	428260	ENSGALG00000000523	1103	1269	1205	1308	1374	1076	1873	1249	1294	1109	1273	1090	1256	1187	1296	947	1121	1090	0.423956	0.880606	0.423956	phosphorylation
1941	428260	ENSGALG00000000523	1103	1269	1205	1308	1374	1076	1873	1249	1294	1109	1273	1090	1256	1187	1296	947	1121	1090	0.423956	0.880606	0.423956	protein kinase activity
1942	428260	ENSGALG00000000523	1103	1269	1205	1308	1374	1076	1873	1249	1294	1109	1273	1090	1256	1187	1296	947	1121	1090	0.423956	0.880606	0.423956	protein serine/threonine kinase activity
1943	428260	ENSGALG00000000523	1103	1269	1205	1308	1374	1076	1873	1249	1294	1109	1273	1090	1256	1187	1296	947	1121	1090	0.423956	0.880606	0.423956	protein phosphorylation
1944	428260	ENSGALG00000000523	1103	1269	1205	1308	1374	1076	1873	1249	1294	1109	1273	1090	1256	1187	1296	947	1121	1090	0.423956	0.880606	0.423956	peptidyl-serine phosphorylation
1945	428260	ENSGALG00000000523	1103	1269	1205	1308	1374	1076	1873	1249	1294	1109	1273	1090	1256	1187	1296	947	1121	1090	0.423956	0.880606	0.423956	intracellular signal transduction
1946	428260	ENSGALG00000000523	1103	1269	1205	1308	1374	1076	1873	1249	1294	1109	1273	1090	1256	1187	1296	947	1121	1090	0.423956	0.880606	0.423956	magnesium ion binding
1947	428260	ENSGALG00000000523	1103	1269	1205	1308	1374	1076	1873	1249	1294	1109	1273	1090	1256	1187	1296	947	1121	1090	0.423956	0.880606	0.423956	mitogen-activated protein kinase kinase kinase binding
1948	428260	ENSGALG00000000523	1103	1269	1205	1308	1374	1076	1873	1249	1294	1109	1273	1090	1256	1187	1296	947	1121	1090	0.423956	0.880606	0.423956	cellular protein modification process
1949	428260	ENSGALG00000000523	1103	1269	1205	1308	1374	1076	1873	1249	1294	1109	1273	1090	1256	1187	1296	947	1121	1090	0.423956	0.880606	0.423956	negative regulation of MAP kinase activity
1950	428260	ENSGALG00000000523	1103	1269	1205	1308	1374	1076	1873	1249	1294	1109	1273	1090	1256	1187	1296	947	1121	1090	0.423956	0.880606	0.423956	nucleus
1951	428260	ENSGALG00000000523	1103	1269	1205	1308	1374	1076	1873	1249	1294	1109	1273	1090	1256	1187	1296	947	1121	1090	0.423956	0.880606	0.423956	cytoplasm
1952	428260	ENSGALG00000000523	1103	1269	1205	1308	1374	1076	1873	1249	1294	1109	1273	1090	1256	1187	1296	947	1121	1090	0.423956	0.880606	0.423956	cytosol
1953	419954	ENSGALG00000000525	662	674	734	660	729	826	909	738	901	893	979	834	959	803	745	693	768	837	0.987444	0.929202	0.987444	protein kinase activity
1954	419954	ENSGALG00000000525	662	674	734	660	729	826	909	738	901	893	979	834	959	803	745	693	768	837	0.987444	0.929202	0.987444	ATP binding
1955	419954	ENSGALG00000000525	662	674	734	660	729	826	909	738	901	893	979	834	959	803	745	693	768	837	0.987444	0.929202	0.987444	protein phosphorylation
1956	419954	ENSGALG00000000525	662	674	734	660	729	826	909	738	901	893	979	834	959	803	745	693	768	837	0.987444	0.929202	0.987444	protein binding
1957	419954	ENSGALG00000000525	662	674	734	660	729	826	909	738	901	893	979	834	959	803	745	693	768	837	0.987444	0.929202	0.987444	blood vessel development
1958	419954	ENSGALG00000000525	662	674	734	660	729	826	909	738	901	893	979	834	959	803	745	693	768	837	0.987444	0.929202	0.987444	intracellular signal transduction
1959	419954	ENSGALG00000000525	662	674	734	660	729	826	909	738	901	893	979	834	959	803	745	693	768	837	0.987444	0.929202	0.987444	positive regulation of I-kappaB kinase/NF-kappaB signaling
1960	419954	ENSGALG00000000525	662	674	734	660	729	826	909	738	901	893	979	834	959	803	745	693	768	837	0.987444	0.929202	0.987444	protein autophosphorylation
1961	419954	ENSGALG00000000525	662	674	734	660	729	826	909	738	901	893	979	834	959	803	745	693	768	837	0.987444	0.929202	0.987444	positive regulation of cell proliferation in bone marrow
1962	419954	ENSGALG00000000525	662	674	734	660	729	826	909	738	901	893	979	834	959	803	745	693	768	837	0.987444	0.929202	0.987444	positive regulation of cell migration involved in sprouting angiogenesis
1963	419954	ENSGALG00000000525	662	674	734	660	729	826	909	738	901	893	979	834	959	803	745	693	768	837	0.987444	0.929202	0.987444	positive regulation of p38MAPK cascade
1964	419954	ENSGALG00000000525	662	674	734	660	729	826	909	738	901	893	979	834	959	803	745	693	768	837	0.987444	0.929202	0.987444	negative regulation of cellular senescence
1965	415857	ENSGALG00000000528	973	656	676	858	1022	829	671	432	387	771	645	554	443	607	748	732	548	680	0.916471	0.984846	0.916471	cytoplasm
1966	415857	ENSGALG00000000528	973	656	676	858	1022	829	671	432	387	771	645	554	443	607	748	732	548	680	0.916471	0.984846	0.916471	negative regulation of protein kinase activity
1967	419955	ENSGALG00000000529	137	47	180	91	55	22	19	68	14	69	91	121	7	20	49	15	17	8	0.16137	0.987274	0.16137	metal ion binding
1968	419955	ENSGALG00000000529	137	47	180	91	55	22	19	68	14	69	91	121	7	20	49	15	17	8	0.16137	0.987274	0.16137	nucleoplasm
1969	419955	ENSGALG00000000529	137	47	180	91	55	22	19	68	14	69	91	121	7	20	49	15	17	8	0.16137	0.987274	0.16137	cytosol
1970	419815	ENSGALG00000000533	1842	2270	1884	2388	2717	1590	1744	1464	1610	1398	1475	1111	1547	1381	1620	1528	1532	1361	0.476704	0.956479	0.476704	nucleus
1971	419815	ENSGALG00000000533	1842	2270	1884	2388	2717	1590	1744	1464	1610	1398	1475	1111	1547	1381	1620	1528	1532	1361	0.476704	0.956479	0.476704	nucleic acid binding
1972	419815	ENSGALG00000000533	1842	2270	1884	2388	2717	1590	1744	1464	1610	1398	1475	1111	1547	1381	1620	1528	1532	1361	0.476704	0.956479	0.476704	RNA binding
1973	419815	ENSGALG00000000533	1842	2270	1884	2388	2717	1590	1744	1464	1610	1398	1475	1111	1547	1381	1620	1528	1532	1361	0.476704	0.956479	0.476704	regulation of alternative mRNA splicing, via spliceosome
1974	419815	ENSGALG00000000533	1842	2270	1884	2388	2717	1590	1744	1464	1610	1398	1475	1111	1547	1381	1620	1528	1532	1361	0.476704	0.956479	0.476704	mRNA cis splicing, via spliceosome
1975	419815	ENSGALG00000000533	1842	2270	1884	2388	2717	1590	1744	1464	1610	1398	1475	1111	1547	1381	1620	1528	1532	1361	0.476704	0.956479	0.476704	nuclear speck
1976	419815	ENSGALG00000000533	1842	2270	1884	2388	2717	1590	1744	1464	1610	1398	1475	1111	1547	1381	1620	1528	1532	1361	0.476704	0.956479	0.476704	phospholipase binding
1977	419815	ENSGALG00000000533	1842	2270	1884	2388	2717	1590	1744	1464	1610	1398	1475	1111	1547	1381	1620	1528	1532	1361	0.476704	0.956479	0.476704	mRNA export from nucleus
1978	419815	ENSGALG00000000533	1842	2270	1884	2388	2717	1590	1744	1464	1610	1398	1475	1111	1547	1381	1620	1528	1532	1361	0.476704	0.956479	0.476704	regulation of mRNA splicing, via spliceosome
1979	419815	ENSGALG00000000533	1842	2270	1884	2388	2717	1590	1744	1464	1610	1398	1475	1111	1547	1381	1620	1528	1532	1361	0.476704	0.956479	0.476704	cellular response to leukemia inhibitory factor
1980	419364	ENSGALG00000000535	406	540	588	565	654	527	367	449	426	394	411	415	332	396	440	419	392	456	0.767455	0.984846	0.767455	membrane
1981	419364	ENSGALG00000000535	406	540	588	565	654	527	367	449	426	394	411	415	332	396	440	419	392	456	0.767455	0.984846	0.767455	nucleus
1982	419364	ENSGALG00000000535	406	540	588	565	654	527	367	449	426	394	411	415	332	396	440	419	392	456	0.767455	0.984846	0.767455	plasma membrane
1983	419364	ENSGALG00000000535	406	540	588	565	654	527	367	449	426	394	411	415	332	396	440	419	392	456	0.767455	0.984846	0.767455	cytoplasm
1984	419364	ENSGALG00000000535	406	540	588	565	654	527	367	449	426	394	411	415	332	396	440	419	392	456	0.767455	0.984846	0.767455	extrinsic component of cytoplasmic side of plasma membrane
1985	419364	ENSGALG00000000535	406	540	588	565	654	527	367	449	426	394	411	415	332	396	440	419	392	456	0.767455	0.984846	0.767455	protein kinase binding
1986	419364	ENSGALG00000000535	406	540	588	565	654	527	367	449	426	394	411	415	332	396	440	419	392	456	0.767455	0.984846	0.767455	negative regulation of epidermal growth factor-activated receptor activity
1987	419364	ENSGALG00000000535	406	540	588	565	654	527	367	449	426	394	411	415	332	396	440	419	392	456	0.767455	0.984846	0.767455	negative regulation of protein autophosphorylation
1988	419364	ENSGALG00000000535	406	540	588	565	654	527	367	449	426	394	411	415	332	396	440	419	392	456	0.767455	0.984846	0.767455	negative regulation of epidermal growth factor receptor signaling pathway
1989	419364	ENSGALG00000000535	406	540	588	565	654	527	367	449	426	394	411	415	332	396	440	419	392	456	0.767455	0.984846	0.767455	skin morphogenesis
1990	419364	ENSGALG00000000535	406	540	588	565	654	527	367	449	426	394	411	415	332	396	440	419	392	456	0.767455	0.984846	0.767455	regulation of keratinocyte differentiation
1991	419364	ENSGALG00000000535	406	540	588	565	654	527	367	449	426	394	411	415	332	396	440	419	392	456	0.767455	0.984846	0.767455	lung alveolus development
1992	419364	ENSGALG00000000535	406	540	588	565	654	527	367	449	426	394	411	415	332	396	440	419	392	456	0.767455	0.984846	0.767455	lung vasculature development
1993	419364	ENSGALG00000000535	406	540	588	565	654	527	367	449	426	394	411	415	332	396	440	419	392	456	0.767455	0.984846	0.767455	lung epithelium development
1994	419364	ENSGALG00000000535	406	540	588	565	654	527	367	449	426	394	411	415	332	396	440	419	392	456	0.767455	0.984846	0.767455	cytosol
1995	419956	ENSGALG00000000538	611	764	589	592	694	759	916	542	767	709	756	562	791	727	837	823	789	725	0.824712	0.985354	0.824712	metal ion binding
1996	419956	ENSGALG00000000538	611	764	589	592	694	759	916	542	767	709	756	562	791	727	837	823	789	725	0.824712	0.985354	0.824712	U2-type spliceosomal complex
1997	419956	ENSGALG00000000538	611	764	589	592	694	759	916	542	767	709	756	562	791	727	837	823	789	725	0.824712	0.985354	0.824712	snoRNA splicing
[truncated: 118,428 more rows]
