# Supplementary material for: Transcriptome-based biomarker gene screening and evaluation of the extracellular fatty acid-binding protein (Ex-FABP) on immune and angiogenesis-related genes in chicken erythrocytes of tibial dyschondroplasia
Source: BMC Genomics. 2022 Apr 22;23:323. doi: 10.1186/s12864-022-08494-9 (PMC9034513; doi:10.1186/s12864-022-08494-9)
Supplement: Supplementary file 4 — Additional file 4. [file 12864_2022_8494_MOESM4_ESM.xlsx]

## Sheet: 19 Common DEGs
Additional file 4. Commonly differentially expressed genes
Ensembl Gene ID	Gene Name	Description	Log2 Fold Change
			T15 vs T2	T6 vs T2	T15 vs T2
ENSGALG00000002043	WDR33	WDR33 (WD Repeat Domain 33)	0.95403	0.0615329	0.892496
ENSGALG00000002260	CISH	cytokine inducible SH2 containing protein [Source:NCBI gene;Acc:395335]	3.23648	0.561538	2.67494
ENSGALG00000004170	ADA	adenosine deaminase [Source:NCBI gene;Acc:419194]	1.52553	0.120734	1.40479
ENSGALG00000006211	BCL2L1	BCL2 like 1 [Source:NCBI gene;Acc:373954]	1.27793	0.0332502	1.24468
ENSGALG00000006630	COMMD7	COMM domain containing 7 [Source:NCBI gene;Acc:419286]	1.27741	-0.371658	1.64906
ENSGALG00000007531	ZFYVE27	zinc finger FYVE-type containing 27 [Source:NCBI gene;Acc:423839]	0.909889	-0.00285022	0.912739
ENSGALG00000008431	SMARCA1	SWI/SNF related, matrix associated, actin dependent regulator of chromatin, subfamily a, member 1 [Source:NCBI gene;Acc:422358]	2.06291	-0.625406	2.68831
ENSGALG00000010174	SLC35B2	solute carrier family 35 member B2 [Source:NCBI gene;Acc:428575]	1.34539	0.0219719	1.32342
ENSGALG00000010175	HSP90AB1	heat shock protein 90 alpha family class B member 1 [Source:NCBI gene;Acc:396188]	1.54056	0.419708	1.12085
ENSGALG00000011859	GBE	eye-globin [Source:NCBI gene;Acc:417972]	7.14107	2.10722	5.03384
ENSGALG00000012994	ERC1	ELKS/RAB6-interacting/CAST family member 1 [Source:NCBI gene;Acc:418153]	1.81454	0.387052	1.42749
ENSGALG00000015122	TAF4B	TATA-box binding protein associated factor 4b [Source:NCBI gene;Acc:421086]	1.469	-0.602987	2.07199
ENSGALG00000019325	LOC417973	uncharacterized LOC417973 [Source:NCBI gene;Acc:417973]	7.89505	2.27213	5.62291
ENSGALG00000026518	RUNDC3A	RUN domain containing 3A [Source:NCBI gene;Acc:100858314]	2.1245	0.373555	1.75095
ENSGALG00000026928	KLF4	Kruppel like factor 4 [Source:NCBI gene;Acc:770254]	2.64638	-0.0743026	2.72068
ENSGALG00000007355	VSIG10L	Uncharacterized protein	1.5973	0.0597292	1.53757
ENSGALG00000027593	ZNF292	Zinc finger protein 292	-1.29893	-0.43406	-0.864874
chicken_newGene_4083	NA	NA	2.44787	-0.513893	2.96176
chicken_newGene_4973	NA	NA	4.00054	-0.171823	4.17236
