# Supplementary material for: Transcriptome-based biomarker gene screening and evaluation of the extracellular fatty acid-binding protein (Ex-FABP) on immune and angiogenesis-related genes in chicken erythrocytes of tibial dyschondroplasia
Source: BMC Genomics. 2022 Apr 22;23:323. doi: 10.1186/s12864-022-08494-9 (PMC9034513; doi:10.1186/s12864-022-08494-9)
Supplement: Supplementary file 6 — Additional file 6. [file 12864_2022_8494_MOESM6_ESM.xlsx]

## Sheet: string_interactions 
Additional file 6. Protein-protein interaction of 19 commonly expressed genes
#node1	node2	node1_string_id	node2_string_id	neighborhood_on_chromosome	gene_fusion	phylogenetic_cooccurrence	homology	coexpression	experimentally_determined_interaction	database_annotated	automated_textmining	combined_score
BCL2L1	CISH	9031.ENSGALP00000010012	9031.ENSGALP00000003536	0	0	0	0	0	0	0	0.253	0.253
BCL2L1	KLF4	9031.ENSGALP00000010012	9031.ENSGALP00000041546	0	0	0	0	0	0.042	0	0.184	0.184
BCL2L1	HSP90AB1	9031.ENSGALP00000010012	9031.ENSGALP00000016523	0	0	0	0	0	0.113	0	0.245	0.302
CISH	KLF4	9031.ENSGALP00000003536	9031.ENSGALP00000041546	0	0	0	0	0.096	0	0	0.115	0.166
HSP90AB1	SLC35B2	9031.ENSGALP00000016523	9031.ENSGALP00000016521	0.051	0	0	0	0.057	0	0	0.157	0.179
KLF4	SMARCA1	9031.ENSGALP00000041546	9031.ENSGALP00000013722	0	0	0	0	0	0.123	0	0.085	0.163
SMARCA1	ZNF292	9031.ENSGALP00000013722	9031.ENSGALP00000041204	0	0	0	0	0.156	0.123	0	0.049	0.234
TAF4B	WDR33	9031.ENSGALP00000024358	9031.ENSGALP00000003172	0	0	0	0	0.17	0.307	0	0.084	0.427

## Sheet: string_protein_sequences
>9031.ENSGALP00000006620 (ADA)
MERGVRVFGEPKVELHIHLDGAIRPETILHFGKKRGVPLPGSTVDELMKHVSYQTPLSLK
LFLEKFNHYMPAIAGDREAVRRIAYELVETKAKEGVVYVEVRYSPHLLANCRVEPIPWGQ
AEGDLTPEEVVNLVNQGLQDGERDFRIKARSILCCMRHMPSWSPEVVELCKKYQNNSVVA
IDLAGDELLMASSDHKAAYEEAERCGIHRTVHAGEAGPATMIKEAVYLLKAERIGHGYHV
LEDPELYRELLRTRMHFEVCPWSSYLTGACLPDFRKHPVVQFKKDQANYSINTDDPLIFN
SNIDKDYGIVKEYMDFTEEDFKRVNINAAQSSFLPEKEKQELLNTLYEAYGMVPATS
>9031.ENSGALP00000010012 (BCL2L1)
MSSSNRELVIDFVSYKLSQRGHCWSELEEEDENRTDTAAEAEMDSVLNGSPSWHPPAGHV
VNGATVHRSSLEVHEIVRASDVRQALRDAGDEFELRYRRAFSDLTSQLHITPGTAYQSFE
QVVNELFHDGVNWGRIVAFFSFGGALCVESVDKEMRVLVGRIVSWMTTYLTDHLDPWIQE
NGGWERFVDLYGNNAAAELRKGQETFNKWLLTGATVAGVLLLGSLLSRK
>9031.ENSGALP00000003536 (CISH)
PHPLLAEEKIQRLSLRGIAEDLTEHIMQPLPVPAFPEEPAPTFAAPEPDGSAPQTRDPEE
DLLCIAKTFSYLRESGWYWGSITASEAKQHLQKMPEGTFLVRDSTHPSYLFTLSVKTNRG
PTNVRIEYADSKFRLDSNYLSKPRILAFPDVVSLIQHYVTSCTTESKSEAPYPPPAPLPP
VQKEVAVAAVHLKLLRPLGRRDSIPSLQHLCRLRINRCTTEVERLPLPRRMGDYLKQYPF
QL
>9031.ENSGALP00000010695 (COMMD7)
MGLLSVGRDAGPEAGSGDVQHLNQLSAEQFSALTEVLFSFLTEPKEVERFLTQLSDFAAM
NKISLGPLKNIVKSILLVPNGALKRNLSPEQVRADFVALGLSEEKASYFAEQWKLNAPTL
TRLAVGQTLMINQLIDMEWKFGVTAGSSELEKVGSIFLQLKLVIKKGSQMENVYVELTLP
QFYSFLHEMERAKTTLESFS
>9031.ENSGALP00000021182 (ERC1)
MYGSARSVGKAEPSNQSPGRSPRLPRSPRLGHRRTNSTGGSSGSSTGGGSGKTLSMENIQ
SLNAAYATSGPMYLSDHENVGADTPKSTMTLGRSGGRLPYGVRMTAMGSSPNIASSGVAS
DTIAFGEHHLPPVSMASTVPHSLRQARDNTIMDLQTQLKEVLRENDLLRKDVEVKESKLS
SSMNSIKTFWSPELKKERALRKDEASKITIWKEQYRVLQEENQHMQMTIQALQDELRIQR
DLNQLFQQDSSSRTSEPFVAELTEENFQRLHTEHERQAKELFLLRKTLEEMELRIETQKQ
TLNARDESIKKLLEMLQSKGLSAKATEEDHERTRRLAEAEMHVHHLESLLEQKEKENNML
REEIHRRFENAPDSAKTKALQTVIEMKDSKISSMERGLRDLEEEIQMLKSNGALSTEERE
EEMKQMEVYRSHSKFMKNKVEQLKEELSAKEVQGEDLKKRVAGLQAEIGQVKQELSRKDT
ELLALQTKLETLTNQFSDSKQHIEVLKESLTAKEQRAAILQTEVDALRLRLEEKETMLNK
KTKQIQEIAEEKGTQAGEIHDLKDMLEVKERKVNVLQKKIENLQEQLRDKEKQMSSLKDR
VKSLQADTTNTDTALTTLEEALAEKERTIERLKEQRDRDEREKQEEIDTYKKDIKDLKEK
VGILQGDLTEKESSLLDLKEHASSLASSGLKKDSRLKTLEIALEQKKEECLKMETQLKKA
HEATLEARASPELSDRMQQLEREVTRYREESSKAQAEVDRLLEILKEMENEKNDKDKKIA
ELERQVKDQNKKVANLKHKEQVEKKKSAQMLEEARRREDNLNDSSQQLQDNLRKKDDRIE
ELEEALRESVQITAEREMVLAQEESARINAEKQVEELMMAMEKVKQELESMKAKLSSTQQ
SLAEKETHLTNLRAERRKHLEEVLEMKQEALLAAISEKDANIALLELSSSKKKTQDEVAA
LKREKDRLVQQLKQQTQNRMKLMADNYEDDHLKSSSHSNQTNHKPSPDQIIQPLLELDQN
RSKLKLYIGHLTALCHDRDPLILRGLTPPASYHLDDDRAAWEKELQKMTQEQLRDELEKG
EKESAELQEFANAILQQIADHCPDILEQVVNALEESS
>9031.ENSGALP00000019321 (GBE)
MSFSEAEVQSARGAWEKMYVDAEDNGTAVLVRMFTEHPDTKSYFTHFKGMDSAEEMKQSD
QVRGHGKRVFTAINDMVQHLDNTEAFLGILNPLGQKHATQLKIDPKNFRIICDIILQLME
EKFGGDCKASFEKVTNEICTHLTNIYKEAGW
>9031.ENSGALP00000016523 (HSP90AB1)
MPEQVQHGEDEVETFAFQAEIAQLMSLIINTFYSNKEIFLRELISNASDALDKIRYESLT
DPSKLDTGKDLKIDIVPNPRDRTLTLLDTGIGMTKADLVNNLGTIAKSGTKAFMEALQAG
ADISMIGQFGVGFYSAYLVAEKVVVITKHNDDEQYAWESSAGGSFTVRTDHGEPIGRGTK
VILYLKEDQTEYLEERRVKEVVKKHSQFIGYPITLYVEKEREKEISDDEAEEEKAEKEEE
ESKDEEKPKIEDVGSDEEEEEGEKSKKKKTKKIKEKYIDQEELNKTKPIWTRNPDDITQE
EYGEFYKSLTNDWEDHLAVKHFSVEGQLEFRALLFIPRRAPFDLFENKKKKNNIKLYVRR
VFIMDSCDELIPEYLNFIRGVVDSEDLPLNISREMLQQSKILKVIRKNIVKKCLELFTEL
AEDKENYKKFYEAFSKNLKLGIHEDSTNRKRLSELLRYHTSQSGDEMTSLSEYVSRMKES
QKSIYYITGESKEQVANSAFVERVRKRGFEVVYMTEPIDEYCVQQLKEFDGKTLVSVTKE
GLELPEDEEEKKKMEESKAKFETLCKLMKEILDKKVEKVTISNRLVSSPCCIVTSTYGWT
ANMERIMKAQALRDNSTMGYMMAKKHLEINPDHPIVETLRQKADADKNDKAVKDLVVLLF
ETALLSSGFSLEDPQTHSNRIYRMIKLGLGIDEDEVIAEESSIAPPDEIPPLEGDEDTSR
MEEVD
>9031.ENSGALP00000041546 (KLF4)
MRQPPGECEMALSGTLLPSIATFAAGAAGREKAPRPAGPGNRWREELSQLKRPPPALTAR
PAEPPPSDLETAPALGPRRETEEFNELLDFDFILSNSLMHQEPAAAAAVVVSPAAAPAPA
ASPCPAGPFAYPLPCAEPGGLLYGGGGGGGGGRDGAPAAAPFNLADISDVSPSGGFVAEL
MRPDLDPVYLPAPAALPPLGSLQGKFVVKAVGDYSHPGLSPKSGPPAAAQPPGSEGPGAP
YSPLQPRMCPKIKQEASPPCTLAPPPHGSGPRGPPPQHDFSMGRLLPARTTPSLGPEEML
SSRDCLPPTPGLGHPPLPLPPGYPPAPGYPTFLPEQLPPGTLQYQELMPPGSCLPEETKP
KRGRRSWPRKRTATHTCDYAGCGKTYTKSSHLKAHLRTHTGEKPYHCDWEGCGWKFARSD
ELTRHYRKHTGHRPFQCQRCDRAFSRSDHLALHMKRHF
>9031.ENSGALP00000029980 (LOC417973)
MSYFYGQHEIPEGECTDPDPREVTSEDIRSETFNAPQQISTCGSNTSEKETLNPEVLERL
EKLEEECSVNRSWHVIYEARLQSLETCYSVFSGRVIQKQVPEKEECEKLKERIRDLEARN
QKLLSQAMSMHNQSENVNDPFHLTAVLSMFRTLKLQEWGKCWSSSDRLSYSRASNIIKKL
FDACEKDIEKRKTDILEILGFSSSDNAANSCKQEQMLGIMKLLRDGYYHSDLGICEIIKQ
ADVPLRSMNLKQFAQKCCRVFCLLLLQDSPVKAVWYMDMWPQHYLEYVDQQVITYHKRNK
LQILWPVLTDGQNVIEKGVAYDGM
>9031.ENSGALP00000041518 (RUNDC3A)
APLQGRAWIRVALMEKRISDYITTALRDTRTTRRFYDDGAIMLREESTLLVGMLIGLGAI
DFSFCLKGEVMDGKVPAVIDYTPYLKFTQSYDYLSEEEERGSMGSSTSEDSSPEHPYLPL
VTDEDSWYNKWRKMEQKFRIVYAQKGYLEELVRLRESQLKDLEAENKRLKLRLEEAVVQN
QLEKRELEGVILELQEQLTGLIPCENPQLAQLSKEMVTPLVNQWPSLGTLNGNESGSDSK
LYRRHSFVSTDQLSAENSLSSDSQRLGEGKREGEPWGPLGKDPTPSMLGLCGSLASLPSC
KSLASLKSNECLVSDSNEASPTRSPS
>9031.ENSGALP00000016521 (SLC35B2)
MLAALPAMATGEEMPPALQDSWGDFWLFRFFINAAGYASIVIPGFLLIQYFKRRNYLETG
RGICFPVIKSCVFGSEVKSVHPEDGSLPPRAEPTESSTARQVLKLLFCAAGLQVSYLTWG
VVQERVMTRTYGATETDPGEKFKDSQFLVFMNRILAFTVAGLYCALTKQPRHGAAMYKYS
FASLSNILSSWCQYEALKYISFPTQVLAKASKVIPVMMMGKLVSHKSYEYWEYLTAALIS
VGVSMFLLSSAPNRHVSTVTTFSGVVLLAGYIVFDSFTSNWQDALFTYKMSPVQMMFGVN
VFSCLFTVGSLLEQGALLESVHFMARHSEFTAHAVLLSVCSACGQLFIFYTINQFGAAVF
TIIMTLRQAFAILLSCLIYGHTVTVVGGLGIAVVFMALFLRVYARSRMKKRSKKLPPGET
PVQKV
>9031.ENSGALP00000013722 (SMARCA1)
MEQGPAAASARSDGEVPSTSAASAQEPGAEEKNDPPFQLKLPPKAARPEKEVDPEYEEKM
KADRAKRFEFLLKQTELFAHFIQPAAQKSPTSPLKVKLGRPRIKKDEKQSLISAGDYRHR
RTEQEEDEELLSESRKTSNVCIRFEESPSYVKGGTLRDYQVRGLNWMISLYENGVNGILA
DEMGLGKTLQTIALLGYLKHYRNIPGPHMVLVPKSTLHNWMNEFKRWVPSLRAVCLIGDK
DARAAFIRDVMMPGEWDVCVTSYEMVIKEKSVFKKFNWRYLVIDEAHRIKNEKSKLSEIV
REFKTTNRLLLTGTPLQNNLHELWALLNFLLPDVFNSADDFDSWFDTKNCLGDQKLVERL
HAVLKPFLLRRIKAEVEKSLPPKKEVKIYLGLSKMQREWYTRILMKDIDILNSAGKMDKM
RLLNILMQLRKCCNHPYLFDGAEPGPPYTTDTHLITNSGKMLVLDKLLAKLREQGSRVLL
FSQMTRLLDILEDYCMWRGYEYCRLDGQTPHEEREEAIDTFNAPNSSKFIFMLSTRAGGL
GINLATADVVILYDSDWNPQVDLQAMDRAHRIGQKKPVRVFRLITDNTVEERIVERAEIK
LRLDSIVIQQGRLIDQQSNKLAKDEMLQMIRHGATHVFASKDSELTEEDITTILERGEKK
TAEMNERLQKMGESSLRNFTMDTEMSLYNFEGEDYREKQKLSMMEWIEPPKRERKANYAV
DAYFREALRVSEPKVPKAPRPPKQPNIQDFQFFPPRLFELLEKEILYYRKTIGYKVPRNP
DLPNAAQVQKEEQKKIDESMPLNPEETEEKEKLLTQGFTNWNKRDFNQFIKANEKYGRDD
IDNIAREVEGKSPEEVIEYSAVFWERCNELQDIERIMAQIERGEARIQRRISIKKALDAK
IARYKAPFHQLRIQYGTNKGKNYTEEEDRFLICMLHKMGFDKENVYEELRQCVRNAPQFR
FDWFIKSRTAMEFQRRCNTLISLIEKENMEIEEKERAEKKKRGAKVTASQKRKADLAAEN
SGKKDAKKVKS
>9031.ENSGALP00000024358 (TAF4B)
MDRRAGAKRGTRADSDCTGGTVLIRSSNGQLMLVSQQAIARAQPQPQNNTSVRLSVPTST
PAVRICAVQNSGTQLIKKAVPTPLKTLSQTTNAVTSTVQSPAVIQPAAATASVTAVTAVK
PLSTGTPVKLPVTGPPAQSISQKAVSVKAEGTTVAQTSTSTEMLENVKKCKNFLATLIKL
ASGSGPQATEMGQNVKNLVQNLLEAKIEPEEFTKKLYVELKSSPQPYLVPFLKKSMLALR
QLMPNAQSFIQQCMQQPAPTQEAVSTCTSALTPSMAVATSPVAANSLPVIKPVSASTTVT
AAPVIKPVLSSASVTASLQAMKPVPASAVVTASLRPAPSVLTTTVSTSGLTAIQTVKPVF
TSAVATSSLQSVKPVLVSTVASSAATPLQPLKPVMGTPISIKISQPNSIVTQPVATQQVV
KVKQLVVQQPSGTIVKQVSTLPQSSTLTLQTPVEKRMPLNTLVQTNQFPAGSVLKQVTLP
GNKILSLQASPIQKTKIKENGTTSFSRDEDDINDVTSMAGVSITEESACILATNSELIGT
VTRSCADEPFLLSEALQKKILNIGKRHDIMELNSDVVNLISHATQERLRGLLEKLTVIAQ
HRVSTHKGSETYIVSSDTRAQLKFLEKLDHLEKQRKDEEEREMLLRAAKSRSNKEDPEHL
RLKQKVKE
>9031.ENSGALP00000031708 (VSIG10L)
MTMSITHYVFLLFLEFSLGVEITERKLAAEGSSVMMHAPAVSNMSITEWEYIEDRTPKFI
LQYYANLKVPIIYAAYQGRVVFYKKNGSLLLQQLREADSGIYKATVDLMQDRTRTTILEV
IKPVPQPKLLKSSDSNGCLIKLICLLPHGTVAAVSWKKDGHSLTSQNYYQLTQNFTELWV
RNGEKSNCGSYSCNVSNAISWEEATFNLTITGLSPPLHAALRTTVAALALAVITAISFVI
WLLQPGKHRLGKEARTWLTPPIRGLLGISCLLLFVTSVIWMLEKGPSAAFILHGLYFLAA
AMTLAVNLSFCFLLLYNFQWDHERGCSEPVDVITSCVLAVLAALLLLLLFALWYHKKKMD
ARTQTRSTHGKEEDRGQNQDKEIRLSLQHPGDDIAQEPS
>9031.ENSGALP00000003172 (WDR33)
MATEIGSPPRFFHMPRFQHQAPRQLFYKRPDFAQQQAMQQLTFDGKRMRKAVNRKTIDYN
PSVIKYLENRVWQRDQRDMRAIQPDAGYYNDLVPPIGMLNNPMNAVTTKFVRTSTNKVKC
PVFVVRWTPEGRRLVTGASSGEFTLWNGLTFNFETILQAHDSPVRAMTWSHNDMWMLTAD
HGGYVKYWQSNMNNVKMFQAHKEAIREASFSPTDNKFATCSDDGTVRIWDFLRCHEERIL
RGHGADVKCVDWHPTKGLVVSGSKDSQQPIKFWDPKTGQSLATLHAHKNTVMEVKLNLNG
NWLLTASRDHLCKLFDIRNLKEELQVFRGHKKEATAVAWHPVHEGLFASGGSDGSLLFWH
VGVEKEVGGMEMAHEGMIWSLAWHPLGHILCSGSNDHTSKFWTRNRPGDKMRDRYNLNLL
PGMSEDGVEYDDLEPNSLAVIPGMGIPEQLKIAMEQEQMGKDESNDIEMTIPGLDWGMEE
VMQKDQKKVPQKKVPYAKPIPAQFQQAWMQNKVPLPPPPEPLIDRKEDIKLEEKKKTQAE
IEQEMAALQYTNPQLLEQLKIERLAQKQAEQVQPPPGGSLHGPQPFPGQGPMSQMPQGFQ
QPLPPQQIPMNMPQMGPPGPQGQFRPPGPQGQMGPQGPPLHQGGGGPQGFMGPQGPPGPH
GPQGMPRPQDLHGHQGMQRHPGPHGPMGPPGPQGNAGPQGHLGPQGLPGSQTHLGPQGPP
GPQGNLGPQGQGMQGPPGPRGMQGPLPHGMQGAPGSQGMQGPISQGPLMGLNPRGMQGPP
GPRDNQGPTPQGMMMGHPQEMRGPHMQSGLLGHGPQEMRGLQGPPPQGAMLGPPQEMRGP
QGQQGPPQGSMVGPQGNMQGPQGQPNPSRGPHPSQGPLPFQQQKTPLLGDGPRPPFNQDG
QNPGPPPLIPGLGQQGGQGRLGPHNQGPGLNKDDFRDDFHPDKRFGHRLREFEGRGGPPL
QDEKWRRGGPGPPFPPDHREFEGGGSNRGPPGAWEGRRPSDDRYPRDPEDARFRGRRDES
FRRGGPSRHEGRGPRGRDGFPGPEDFGPDDTFDSPDENLRGRDHGARGRGRGAIRGGRKG
LLPTPDEIPRFEGGRKPESWDGNREPGPRPDHPPHDGHSPANRERSSSLQGMDMASLPPR
KRPWHDGPGTSDPREMDAPGGPPEERGKGRGNSGASQRAPKSARSNSLDGDHHDGFHRDE
AFGGGPAGGSNPSRGGRSGSNWGRGNNMNSGQSRRGASRGGGRGR
>9031.ENSGALP00000042307 (ZFYVE27)
MQAAERDGVAGGLEAAAAVAATGGGEASSEPPSPPKTAAFDLLDLVRSYRRLELYLEPLR
DAAEGVRSLLRWQRPLCSLLVCLGLNFLLLTLDQAAWYSVLALLVLLPALLGYLQETYRV
RPSERELLRRKYHSVRREDLRRVQLSRQEALAQVKCFLIQLEGFLSGLCYNCEAVYRVLY
WENPTVSSQFYGALLGSVCILYLLPLCWVMAILNSTLFLGNSQFYQVIKELKASVEQSLG
TKPLESAPEPAKPLPTDAPPDRTPTPTSTEDLTPGSVEEAEEAEPDEEFKDAIEENQLLV
MEDDEGSQCSADFDLSLPDNGFMSKNDVIRSKVSRLTERLRKRYPSNNFGTCTGCGATFS
VLKKRRSCSNCGNSFCSRCCSFKVPKAVMGATAPEAQRETVFVCAQCNQMLIK
>9031.ENSGALP00000041204 (ZNF292)
MADEEAEQESGSPGGDLLELRRLRERLLELETGLRESAEPAVQAATEYCKQLCQTLLEYA
EKWKTSEDPLPLLEVYTVAIRSYVKARPYLTSECENVAFVLERLALSCIELLLCLPLDLP
ENKWEEFQAFVQVAHKNLMENGSRELHILTTLTQEKGVWKNPVLCGILSQEQLDPEKVNE
FLVFEGPVLLDMRIKHLMKTKQLIQATALAKLCSDHPEISAQGNFKQTYLVCLCSGSPNE
KLMEEIAEVDCKDALEMICNLESDGDEKSALILCAAFLSRQLQQGEMYCAWELTLFWSKL
QQRVEPSIQVYLERCRQLSVLTKTVYHIFFLIKVINSEIDGAGLATCIELCVKALRLESS
ENADVKISICKTISCLLPDDLEVKRACQLSEFLLEPTVDAYYAVEMLYNQPDQKYDEENL
PIPNSLRCELLLVLKTQWPFDPEFWDWKTLKRQCLALMGEEASIVSSIDELNDSEVYEKV
EDCQDETKETSMNGFAGSFDEATSLLKGIRDEKQKKREIKKLRERGFISARFRNWQAYMQ
YCVLCDKEFLGHRIVRHAQKHYKDGIYSCPICAQNFNSKENFVPHVTLHVKKSSKERLAA
MKPLRRLGRPPKIATTNENQKTNSISKQEQRPIKKNSLYSTDFIVFNDNDGSDDENDDKD
KPYVPEIVPVQKPLPVNEFTCPVTFCKKGFKYFKNLIAHAKGHKDNEEAKRFLEMQSKKV
ICQYCRRHFVSVTHLNDHLQMHCGSKPYICIQMKCKAGFNSYAELLTHRKEHQVFRAKCM
FPKCGRVFSEAYLLYDHEAQHYNTYTCKFTGCGKVYRSQNELEKHIEEHNKQPENVQQPE
GQTNQPDLSQPSKANESTDGVAVKEESASAPADNQSSFTEGENYGWNEIKAEPVGSESVN
TSPSILQQSDSLPNAAPEEAAAGSVKTEVAIPVSSVKVLAVNQKIRDNFVRRGKLAATTS
KVDTTKSGAQQLCSTVDSCLPVFQERKEENCLNQSQNVQNISVSSNTLKPEALESKSLEG
QVNIVNTLSVQNQAGYRNSVPISKLEIEDSIKAAANLYNLPLKTLESITFIPPQPSINNS
LVPNVSPAAPVQKFSCQVEGCTRTYNSSQSIGKHMKAAHPDQYATFKMQRKNKKPRKSSN
LQNVENNEKVVCLMPSQVGNASSAAFTAQNKTNSNPTCSSQVQHLSSTLFPTHLENLTNP
MLPVVESVVNPSLSTRIKSEPESVLCSQMENLSGVTLPSQLEDLAKRVMPLNIDGSSDPF
LPLPAENGPMSLFPSPSENAPSSVFSQLENNTNNFSSQLEGNSSSAFPKEETIDQLFPSR
VNNENNFSETGSQHPASEKVKKDRGRGPNGKERKPKHNKRAKWPAIIRDGKFICSRCFRV
FTNPRSLGGHLSKRSYCKPLEGSEISAEALQANGQSLLASMILSSNSLSLQQPQESTFNP
ELCFKDPAFLQLLASENRSAALLQTMFPRANVPNFNTGGNEEGNQIIKQALETAGISSTF
DTTEVLPHVVTTSCVTGTTQINAAVLPNSTMSPLLQTVCNPSTLLTDQNRTLNTKIPSVN
ECKSLPVFATDDLMLKTIENGLCSSSFSNAAAAAQTFAGNTSRVSVISTPNNSVSNNSNK
KGTSASKRKRKATTPLVAPNIAQKVAVNNITATGLLAKSTEGNMQTQGDNFQSNLLANCD
SQAVAENLTQKLSDADNQLFVASIKENFKTNLEAHTALTVKAENGDSQMMATNSCVRTNS
EEHISEDNVIQNFEKTLEIIKSAMNSQMLEVKTEIQDTGTASGQSLQVNNTQTSSGNSSH
SVLLPTHTQFAVHSGNVTAAKTNSTQSETSQKVDNQILEILEGLQKLKLENDSSIQVSES
VCQCPPADTLAPAVPVLPIENKPLIQISSETIIHFSDKVNKPFVCQNQGCNYSAMTKDAL
FKHYGKVHQYTAEMILEIKKHQLKYAPFKCVVASCPKTFTRNSNLRAHCQLVHHFTTEEM
VKLKIKRPYGRRSQNEIVNTTSQPVEINLQTLITENKAAAPLDKEGQIKEALEPVNVLEK
LIPEKNIPERLETPPQVVSVPLEQHNAATFDNAEAKACKVRRHRKEKEERKRRKPVTKPL
EFPTRYSPYRPYRCVHQGCFAAFTIQQNLILHYQAVHKSDLPAFSAEVEEESEPSKEERD
ETETKPTIREFRCEMSDCSRIFQEVPSLIQHYMKLHNMTPEQIRNMKPAPEAGRFSCDQS
QCKSSFTVYFNYVTHLETDHGVKIRPNKVEDDGVFKCDCEGCDRIYATRSNLLRHIFNKH
NDRHKDHLIRPRRLTPGQENISSKANQEKPVKSKQRGLKNKSGKESSRLSEKTKRKKNVN
LENKNVKAMQIQENKAYSLKRGKHVFSIKARNEALSECTSRFVTQYPCMIKGCSSVVTSE
SNIIRHYKCHKLSKAFTSQHRNLLIVSKKHSVPEVKETPFEQEETDKKIDVEGTEPSSLA
SNNDSSTSTLPQKEAEKGEKDEVDELTELFITKLINEDCSSAENQAKISSNVNSDSQETN
SCPSEKQKSNNLKRSKQRKK

## Sheet: string_protein_annotations
#node	identifier	domain_summary_url	annotation	other_names_and_aliases
ADA	9031.ENSGALP00000006620	https://smart.embl.de/smart/DDvec.cgi?smart=357:Pfam_A_deaminase(9|345)+	Adenosine deaminase; Catalyzes the hydrolytic deamination of adenosine and 2- deoxyadenosine. Plays an important role in purine metabolism and in adenosine homeostasis. Modulates signaling by extracellular adenosine, and so contributes indirectly to cellular signaling events. May act as a positive regulator of T-cell coactivation (By similarity); Belongs to the metallo-dependent hydrolases superf…	3.5.4.4,419194,ADA,ADA-201,ADA_CHICK,Adenosine aminohydrolase,Adenosine deaminase,EC 3.5.4.4,ENSGALG00000004170,ENSGALP00000006620,ENSGALT00000006631,F1P2A6,Gallus gallus adenosine deaminase (ADA), mRNA.,Gga.9054,NM_001006290,NM_001006290.2,NP_001006290,NP_001006290.1,Q5ZKP6,RCJMB04_9m8,UPI0000449625,adenosine deaminase,gga:419194
BCL2L1	9031.ENSGALP00000010012	https://smart.embl.de/smart/DDvec.cgi?smart=229:Pfam_BH4(1|26)+BCL(86|184)+TRANS(209|226)+	Bcl-2-like protein 1; Dominant regulator of apoptotic cell death. The long form displays cell death repressor activity, whereas the short isoform promotes apoptosis. Also acts as a regulator of G2 checkpoint and progression to cytokinesis during mitosis (By similarity)	373954,AAB07677.1,AAL35559.1,ADB24791.1,AF432511,Apoptosis regulator Bcl-X,B2CL1_CHICK,BCL-X,BCL2 like 1,BCL2L,BCL2L1,BCL2L1-201,BCL2L1-202,BCLX,Bcl-2-like protein 1,Bcl-xl,CAA80657.1,D2XQ55,ENSGALG00000006211,ENSGALP00000010012,ENSGALP00000010059,ENSGALT00000010026,ENSGALT00000010073,GU230783,Gga.4944,NM_001025304,NM_001025304.1,NP_001020475,NP_001020475.1,Q07816,Q8UWJ1,Q98908,U26645,UPI00001268…
CISH	9031.ENSGALP00000003536	https://smart.embl.de/smart/DDvec.cgi?smart=242:SH2(75|164)+SOCS_box(204|238)+	Cytokine-inducible SH2-containing protein; SOCS family proteins form part of a classical negative feedback system that regulates cytokine signal transduction. CIS is involved in the negative regulation of cytokines that signal through the JAK-STAT5 pathway such as erythropoietin, prolactin and interleukin 3 (IL3) receptor. Inhibits STAT5 trans-activation by suppressing its tyrosine phosphorylatio…	395335,AAD46657.1,AF167297,CIS,CIS-1,CISH,CISH-201,CISH_CHICK,Cytokine-inducible SH2-containing protein,ENSGALG00000002260,ENSGALP00000003536,ENSGALT00000003543,G1K2Y8,Gga.971,NM_204626,NM_204626.1,NP_989957,NP_989957.1,Q9PW70,Suppressor of cytokine signaling,UPI0000ECAE2C,cytokine inducible SH2 containing protein,gga:395335
COMMD7	9031.ENSGALP00000010695	https://smart.embl.de/smart/DDvec.cgi?smart=200:Pfam_COMM_domain(131|200)+	Gallus gallus COMM domain containing 7 (COMMD7), transcript variant 2, mRNA	419286,A0A1L1RYA5,A0A1L1RYA5_CHICK,AADN03007913,COMM domain containing 7,COMMD7,COMMD7-201,E1BU89,ENSGALG00000006630,ENSGALP00000010695,ENSGALT00000010709,NM_001278013,NM_001278013.1,NM_001278014,NM_001278014.1,NP_001264942,NP_001264942.1,NP_001264943,NP_001264943.1,UPI00003AC2BC,gga:419286
ERC1	9031.ENSGALP00000021182	https://smart.embl.de/smart/DDvec.cgi?smart=1117:Pfam_Cast(455|832)+Pfam_Cast(827|982)+Pfam_RBD-FIP(1069|1109)+	ELKS/RAB6-interacting/CAST family member 1	418153,AADN03000991,CAST2,E1BQR7,E1BQR7_CHICK,ELKS,ELKS/RAB6-interacting/CAST family member 1,ENSGALG00000012994,ENSGALP00000021181,ENSGALP00000021182,ENSGALT00000021212,ENSGALT00000021213,ERC1,ERC1-201,KIAA1081,MGC12974,RAB6IP2,UPI000240B1B2,XM_004937931,XM_004937931.1,XM_004937935,XM_004937935.1,XM_416384,XM_416384.4,XP_004937988,XP_004937988.1,XP_004937992,XP_004937992.1,XP_015142263.1,XP_4163…
GBE	9031.ENSGALP00000019321	https://smart.embl.de/smart/DDvec.cgi?smart=151:Pfam_Globin(7|116)+	Eye-globin; Gallus gallus eye-globin (GBE), mRNA; Belongs to the globin family	417972,AJ812228,CAH23230.1,ENSGALG00000011859,ENSGALP00000019321,ENSGALP00000037226,ENSGALT00000019347,ENSGALT00000038020,Eye-globin,GBE,GBE-201,Gallus gallus eye-globin (GBE), mRNA.,NM_001008786,NM_001008786.2,NP_001008786,NP_001008786.1,Q5QRU6,Q5QRU6_CHICK,UPI0000495F4B,eye-globin,gga:417972
HSP90AB1	9031.ENSGALP00000016523	https://smart.embl.de/smart/DDvec.cgi?smart=725:HATPase_c(35|189)+Pfam_HSP90(191|713)+	Heat shock cognate protein HSP 90-beta; Molecular chaperone that promotes the maturation, structural maintenance and proper regulation of specific target proteins involved for instance in cell cycle control and signal transduction. Undergoes a functional cycle that is linked to its ATPase activity. This cycle probably induces conformational changes in the client proteins, thereby causing their ac…	396188,ENSGALG00000010175,ENSGALP00000016523,ENSGALP00000037355,ENSGALT00000016542,ENSGALT00000038147,F1NC33,Gga.4332,HS90B_CHICK,HSP90AB1,HSP90AB1-201,HSPCB,Heat shock cognate protein HSP 90-beta,NM_206959,NM_206959.1,NP_996842,NP_996842.1,Q04619,UPI00003ACCF5,gga:396188
KLF4	9031.ENSGALP00000041546	https://smart.embl.de/smart/DDvec.cgi?smart=458:ZnF_C2H2(375|399)+ZnF_C2H2(405|429)+ZnF_C2H2(435|457)+	Kruppel-like factor 4 (gut)	ENSGALG00000026928,ENSGALP00000041546,ENSGALT00000042652,EZF,GKLF,KLF4,KLF4-201,Kruppel like factor 4,Kruppel-like factor 4 (gut),R4GHJ8,R4GHJ8_CHICK,UPI0002C87B98,XM_001233583,XM_001233583.3,XM_004949369,XM_004949369.1,XP_001233584,XP_001233584.2,XP_004949426,XP_004949426.1,gga:770254
LOC417973	9031.ENSGALP00000029980	https://smart.embl.de/smart/DDvec.cgi?smart=324:COIL(97|136)+	Uncharacterized protein	A0A1L1RJF0,A0A1L1RJF0_CHICK,E1BZ47,ENSGALG00000019325,ENSGALP00000029979,ENSGALP00000029980,ENSGALT00000030616,ENSGALT00000030617,LOC417973,UPI0000ECD23D,Uncharacterized protein,XP_015144782,XP_429539,XP_429539.3,gga:417973
RUNDC3A	9031.ENSGALP00000041518	https://smart.embl.de/smart/DDvec.cgi?smart=326:RUN(5|67)+COIL(147|201)+	RUN domain containing 3A	AADN03008830,ENSGALG00000026518,ENSGALP00000041518,ENSGALT00000045121,R4GHH3,R4GHH3_CHICK,RAP2IP,RPIP8,RUN domain containing 3A,RUNDC3A,RUNDC3A-201,UPI0002C871BC,XM_003642787,XM_003642787.2,XP_003642835,XP_003642835.2,XP_015154851,gga:100858314
SLC35B2	9031.ENSGALP00000016521	https://smart.embl.de/smart/DDvec.cgi?smart=425:TRANS(26|48)+Pfam_UAA(104|405)+	Solute carrier family 35 (adenosine 3'-phospho 5'-phosphosulfate transporter), member B2	428575,AADN03003281,ENSGALG00000010174,ENSGALP00000016521,ENSGALT00000016540,F1NC34,F1NC34_CHICK,MIR4647,SLC35B2,SLC35B2-201,Solute carrier family 35 member B2,UGTrel4,UPI0000E8008B,XM_426131,XM_426131.4,XP_015139267,XP_015139269.1,XP_015139270.1,XP_426131,XP_426131.2,gga:428575,microRNA 4647
SMARCA1	9031.ENSGALP00000013722	https://smart.embl.de/smart/DDvec.cgi?smart=1031:Pfam_DBINO(40|89)+DEXDc(152|344)+HELICc(489|573)+SANT(817|866)+SANT(919|983)+	Uncharacterized protein; SWI/SNF related, matrix associated, actin dependent regulator of chromatin, subfamily a, member 1	3.6.4.-,422358,EC 3.6.4.-,ENSGALG00000008431,ENSGALP00000013722,ENSGALT00000013737,F1P3Q4,F1P3Q4_CHICK,Gga.2597,ISWI,NURF140,SMARCA1,SMARCA1-201,SNF2L,SNF2L1,SNF2LB,SWI,UPI0000E8030E,Uncharacterized protein,XM_420329,XM_420329.4,XP_004940881,XP_004940881.1,XP_420329,XP_420329.2,gga:422358
TAF4B	9031.ENSGALP00000024358	https://smart.embl.de/smart/DDvec.cgi?smart=668:TAFH(166|259)+Pfam_TAF4(512|668)+	TAF4b RNA polymerase II, TATA box binding protein (TBP)-associated factor, 105kDa	AADN03002412,ENSGALG00000015122,ENSGALP00000024358,ENSGALP00000036022,ENSGALP00000036023,ENSGALT00000024404,ENSGALT00000036811,ENSGALT00000036812,F1NK10,F1NK10_CHICK,TAF2C2,TAF4B,TAF4B-201,TAFII105,TATA-box binding protein associated factor 4b,UPI0002C86D74,XM_419170,XM_419170.4,XP_015133479,XP_419170,XP_419170.4,gga:421086
VSIG10L	9031.ENSGALP00000031708	https://smart.embl.de/smart/DDvec.cgi?smart=399:SIGNAL(1|19)+IG_like(23|121)+IG_like(129|211)+TRANS(225|244)+TRANS(259|281)+TRANS(294|316)+TRANS(331|353)+	Uncharacterized protein	A0A1L1RZC3,A0A1L1RZC3_CHICK,E1C272,ENSGALG00000007355,ENSGALP00000011882,ENSGALP00000031708,ENSGALP00000031709,ENSGALP00000031710,ENSGALP00000031711,ENSGALP00000031712,ENSGALP00000031713,ENSGALT00000011896,ENSGALT00000032344,ENSGALT00000032345,ENSGALT00000032346,ENSGALT00000032347,ENSGALT00000032348,ENSGALT00000032349,UPI0000ECC3CC,Uncharacterized protein,VSIG10L,XP_004940800,gga:422293
WDR33	9031.ENSGALP00000003172	https://smart.embl.de/smart/DDvec.cgi?smart=1245:WD40(107|147)+WD40(150|189)+WD40(191|230)+WD40(233|274)+WD40(277|316)+WD40(320|360)+WD40(364|403)+COIL(530|560)+	WD repeat domain 33	A0A1D5PT91,A0A1D5PT91_CHICK,AADN03005862,E1BT84,ENSGALG00000002043,ENSGALP00000003171,ENSGALP00000003172,ENSGALT00000003176,ENSGALT00000003177,FLJ11294,NET14,UPI0002C86754,WD repeat domain 33,WDC146,WDR33,WDR33-201,XM_004936956,XM_004936956.1,XP_004937013,XP_004937013.1,XP_004937016,XP_004937016.1,XP_015132674,gga:424753
ZFYVE27	9031.ENSGALP00000042307	https://smart.embl.de/smart/DDvec.cgi?smart=413:TRANS(95|114)+TRANS(190|212)+FYVE(338|413)+	Protrudin; Key regulator of RAB11-dependent vesicular trafficking during neurite extension through polarized membrane transport. Promotes axonal elongation and contributes to the establishment of neuronal cell polarity. Involved in nerve growth factor-induced neurite formation in VAPA-dependent manner. Contributes to both the formation and stabilization of the tubular ER network. Involved in ER m…	423839,ENSGALG00000007531,ENSGALP00000012167,ENSGALP00000042307,ENSGALT00000012181,ENSGALT00000043515,F1NT08,Gga.22313,NM_001039304,NM_001039304.1,NP_001034393,NP_001034393.1,Protrudin,Q5ZL36,R4GJJ0,RCJMB04_7p9,UPI0000ECB5D1,UPI0002C86AEA,ZFY27_CHICK,ZFYVE27,ZFYVE27-201,ZFYVE27-202,Zinc finger FYVE domain-containing protein 27,gga:423839,zinc finger FYVE-type containing 27
ZNF292	9031.ENSGALP00000041204	https://smart.embl.de/smart/DDvec.cgi?smart=2540:ZnF_C2H2(540|561)+ZnF_C2H2(567|589)+ZnF_C2H2(679|703)+ZnF_C2H2(720|742)+ZnF_C2H2(748|772)+ZnF_C2H2(777|801)+ZnF_C2H2(805|829)+ZnF_C2H2(1094|1119)+ZnF_C2H2(1372|1392)+ZnF_C2H2(1903|1928)+ZnF_C2H2(1948|1973)+ZnF_C2H2(2112|2137)+ZnF_C2H2(2171|2196)+ZnF_C2H2(2215|2240)+ZnF_C2H2(2255|2280)+ZnF_C2H2(2386|2410)+	Zinc finger protein 292	421828,A0A1D5PGH7,A0A1D5PGH7_CHICK,AADN03003617,ENSGALG00000027593,ENSGALP00000041204,ENSGALT00000046053,KIAA0530,R4GGN4,UPI0002C87CE4,XM_419852,XM_419852.4,XP_419852,XP_419852.3,XP_419852.4,ZFP292,ZNF292,ZNF292-201,Zinc finger protein 292,Zn-15,Zn-16,bA393I2.3,gga:421828,zinc finger protein 292

## Sheet: string_network_coordinates
#node	identifier	x_position	y_position	color	annotation
ADA	9031.ENSGALP00000006620	0.547951	0.52581	rgb(255,0,0)	Adenosine deaminase; Catalyzes the hydrolytic deamination of adenosine and 2- deoxyadenosine. Plays an important role in purine metabolism and in adenosine homeostasis. Modulates signaling by extracellular adenosine, and so contributes indirectly to cellular signaling events. May act as a positive regulator of T-cell coactivation (By similarity); Belongs to the metallo-dependent hydrolases superf…
BCL2L1	9031.ENSGALP00000010012	0.410553	0.469701	rgb(223,239,117)	Bcl-2-like protein 1; Dominant regulator of apoptotic cell death. The long form displays cell death repressor activity, whereas the short isoform promotes apoptosis. Also acts as a regulator of G2 checkpoint and progression to cytokinesis during mitosis (By similarity)
CISH	9031.ENSGALP00000003536	0.457582	0.162219	rgb(101,199,255)	Cytokine-inducible SH2-containing protein; SOCS family proteins form part of a classical negative feedback system that regulates cytokine signal transduction. CIS is involved in the negative regulation of cytokines that signal through the JAK-STAT5 pathway such as erythropoietin, prolactin and interleukin 3 (IL3) receptor. Inhibits STAT5 trans-activation by suppressing its tyrosine phosphorylatio…
COMMD7	9031.ENSGALP00000010695	0.581148	0.283416	rgb(154,239,117)	Gallus gallus COMM domain containing 7 (COMMD7), transcript variant 2, mRNA
ERC1	9031.ENSGALP00000021182	0.531352	0.768204	rgb(239,186,117)	ELKS/RAB6-interacting/CAST family member 1
GBE	9031.ENSGALP00000019321	0.647541	0.768204	rgb(150,101,255)	Eye-globin; Gallus gallus eye-globin (GBE), mRNA; Belongs to the globin family
HSP90AB1	9031.ENSGALP00000016523	0.293443	0.644763	rgb(178,171,0)	Heat shock cognate protein HSP 90-beta; Molecular chaperone that promotes the maturation, structural maintenance and proper regulation of specific target proteins involved for instance in cell cycle control and signal transduction. Undergoes a functional cycle that is linked to its ATPase activity. This cycle probably induces conformational changes in the client proteins, thereby causing their ac…
KLF4	9031.ENSGALP00000041546	0.544262	0.413591	rgb(239,220,117)	Kruppel-like factor 4 (gut)
LOC417973	9031.ENSGALP00000029980	0.448361	0.647007	rgb(239,117,117)	Uncharacterized protein
RUNDC3A	9031.ENSGALP00000041518	0.564549	0.162219	rgb(14,178,0)	RUN domain containing 3A
SLC35B2	9031.ENSGALP00000016521	0.182787	0.826559	rgb(189,239,117)	Solute carrier family 35 (adenosine 3'-phospho 5'-phosphosulfate transporter), member B2
SMARCA1	9031.ENSGALP00000013722	0.678893	0.480923	rgb(255,175,101)	Uncharacterized protein; SWI/SNF related, matrix associated, actin dependent regulator of chromatin, subfamily a, member 1
TAF4B	9031.ENSGALP00000024358	0.564549	0.653741	rgb(0,178,157)	TAF4b RNA polymerase II, TATA box binding protein (TBP)-associated factor, 105kDa
VSIG10L	9031.ENSGALP00000031708	0.415164	0.849002	rgb(101,255,163)	Uncharacterized protein
WDR33	9031.ENSGALP00000003172	0.695492	0.606608	rgb(0,28,178)	WD repeat domain 33
ZFYVE27	9031.ENSGALP00000042307	0.680738	0.162219	rgb(187,255,101)	Protrudin; Key regulator of RAB11-dependent vesicular trafficking during neurite extension through polarized membrane transport. Promotes axonal elongation and contributes to the establishment of neuronal cell polarity. Involved in nerve growth factor-induced neurite formation in VAPA-dependent manner. Contributes to both the formation and stabilization of the tubular ER network. Involved in ER m…
ZNF292	9031.ENSGALP00000041204	0.810758	0.534788	rgb(239,151,117)	Zinc finger protein 292

## Sheet: enrichment.Process
#term ID	term description	observed gene count	background gene count	strength	false discovery rate	matching proteins in your network (IDs)	matching proteins in your network (labels)
GO:0009966	regulation of signal transduction	4	265	1.14	0.0346	9031.ENSGALP00000003536,9031.ENSGALP00000006620,9031.ENSGALP00000010012,9031.ENSGALP00000016523	CISH,ADA,BCL2L1,HSP90AB1
GO:0009968	negative regulation of signal transduction	3	88	1.49	0.0346	9031.ENSGALP00000003536,9031.ENSGALP00000006620,9031.ENSGALP00000010012	CISH,ADA,BCL2L1
GO:0040008	regulation of growth	3	74	1.57	0.0346	9031.ENSGALP00000003536,9031.ENSGALP00000010012,9031.ENSGALP00000042307	CISH,BCL2L1,ZFYVE27
GO:1902532	negative regulation of intracellular signal transduction	2	36	1.7	0.0353	9031.ENSGALP00000003536,9031.ENSGALP00000010012	CISH,BCL2L1
GO:0045786	negative regulation of cell cycle	2	38	1.68	0.0356	9031.ENSGALP00000010012,9031.ENSGALP00000016523	BCL2L1,HSP90AB1
GO:0048523	negative regulation of cellular process	4	414	0.95	0.0356	9031.ENSGALP00000003536,9031.ENSGALP00000006620,9031.ENSGALP00000010012,9031.ENSGALP00000016523	CISH,ADA,BCL2L1,HSP90AB1
GO:0071310	cellular response to organic substance	3	183	1.17	0.0357	9031.ENSGALP00000003536,9031.ENSGALP00000010012,9031.ENSGALP00000042307	CISH,BCL2L1,ZFYVE27
GO:0007166	cell surface receptor signaling pathway	3	214	1.11	0.0458	9031.ENSGALP00000003536,9031.ENSGALP00000010012,9031.ENSGALP00000042307	CISH,BCL2L1,ZFYVE27
GO:0010564	regulation of cell cycle process	2	51	1.55	0.0458	9031.ENSGALP00000010012,9031.ENSGALP00000016523	BCL2L1,HSP90AB1
GO:0034097	response to cytokine	2	57	1.51	0.0472	9031.ENSGALP00000003536,9031.ENSGALP00000010012	CISH,BCL2L1

## Sheet: enrichment.Component
#term ID	term description	observed gene count	background gene count	strength	false discovery rate	matching proteins in your network (IDs)	matching proteins in your network (labels)
GO:0031410	cytoplasmic vesicle	4	166	1.34	0.0027	9031.ENSGALP00000006620,9031.ENSGALP00000010012,9031.ENSGALP00000016523,9031.ENSGALP00000042307	ADA,BCL2L1,HSP90AB1,ZFYVE27
