# Supplementary material for: Transcriptome-based biomarker gene screening and evaluation of the extracellular fatty acid-binding protein (Ex-FABP) on immune and angiogenesis-related genes in chicken erythrocytes of tibial dyschondroplasia
Source: BMC Genomics. 2022 Apr 22;23:323. doi: 10.1186/s12864-022-08494-9 (PMC9034513; doi:10.1186/s12864-022-08494-9)
Supplement: Supplementary file 7 — Additional file 7. [file 12864_2022_8494_MOESM7_ESM.xlsx]

## Sheet: GO_T6 vs T2
Additional file 7. Gene ontology of differentially expressed genes under likelihood ration test
	Ontology	ID	Description	Gene Ratio	Bg Ratio	pvalue	p.adjust	qvalue	GeneID	Count
GO:0000776	CC	GO:0000776	kinetochore	1935-04-01	17/1435	0.000564412	0.0694227	0.0606001	ENSGALG00000001163/ENSGALG00000005038/ENSGALG00000016609/ENSGALG00000027454	4
GO:0031410	CC	GO:0031410	cytoplasmic vesicle	1935-09-01	126/1435	0.00229807	0.078453	0.0684827	ENSGALG00000001163/ENSGALG00000004170/ENSGALG00000005656/ENSGALG00000006211/ENSGALG00000007531/ENSGALG00000010175/ENSGALG00000015148/ENSGALG00000016669/ENSGALG00000019696	9
GO:0097708	CC	GO:0097708	intracellular vesicle	1935-09-01	126/1435	0.00229807	0.078453	0.0684827	ENSGALG00000001163/ENSGALG00000004170/ENSGALG00000005656/ENSGALG00000006211/ENSGALG00000007531/ENSGALG00000010175/ENSGALG00000015148/ENSGALG00000016669/ENSGALG00000019696	9
GO:0000775	CC	GO:0000775	chromosome, centromeric region	1935-04-01	25/1435	0.00260952	0.078453	0.0684827	ENSGALG00000001163/ENSGALG00000005038/ENSGALG00000016609/ENSGALG00000027454	4
GO:0031982	CC	GO:0031982	vesicle	1935-09-01	132/1435	0.00318914	0.078453	0.0684827	ENSGALG00000001163/ENSGALG00000004170/ENSGALG00000005656/ENSGALG00000006211/ENSGALG00000007531/ENSGALG00000010175/ENSGALG00000015148/ENSGALG00000016669/ENSGALG00000019696	9
GO:0099503	CC	GO:0099503	secretory vesicle	1935-04-01	28/1435	0.00400884	0.0821813	0.0717372	ENSGALG00000001163/ENSGALG00000006211/ENSGALG00000016669/ENSGALG00000019696	4

## Sheet: GO_T15 vs T2
	Ontology	ID	Description	Gene Ratio	Bg Ratio	pvalue	p.adjust	qvalue	Gene ID	Count
GO:1903827	BP	GO:1903827	regulation of cellular protein localization	1950-08-01	34/1381	1.47664e-05	0.0110276	0.00969281	ENSGALG00000000209/ENSGALG00000001163/ENSGALG00000001329/ENSGALG00000006211/ENSGALG00000010175/ENSGALG00000013624/ENSGALG00000016692/ENSGALG00000016880	8
GO:0006094	BP	GO:0006094	gluconeogenesis	1950-05-01	12/1381	3.32825e-05	0.0110276	0.00969281	ENSGALG00000002377/ENSGALG00000012638/ENSGALG00000013310/ENSGALG00000014442/ENSGALG00000026077	5
GO:0019319	BP	GO:0019319	hexose biosynthetic process	1950-05-01	12/1381	3.32825e-05	0.0110276	0.00969281	ENSGALG00000002377/ENSGALG00000012638/ENSGALG00000013310/ENSGALG00000014442/ENSGALG00000026077	5
GO:0032880	BP	GO:0032880	regulation of protein localization	1950-10-01	63/1381	4.6192e-05	0.0114787	0.0100893	ENSGALG00000000209/ENSGALG00000001163/ENSGALG00000001329/ENSGALG00000006211/ENSGALG00000010175/ENSGALG00000013624/ENSGALG00000014442/ENSGALG00000015148/ENSGALG00000016692/ENSGALG00000016880	10
GO:0000226	BP	GO:0000226	microtubule cytoskeleton organization	1950-08-01	44/1381	0.00010916	0.0181553	0.0159577	ENSGALG00000001163/ENSGALG00000002095/ENSGALG00000005302/ENSGALG00000006657/ENSGALG00000007447/ENSGALG00000010889/ENSGALG00000014442/ENSGALG00000027454	8
GO:0046364	BP	GO:0046364	monosaccharide biosynthetic process	1950-05-01	15/1381	0.000116173	0.0181553	0.0159577	ENSGALG00000002377/ENSGALG00000012638/ENSGALG00000013310/ENSGALG00000014442/ENSGALG00000026077	5
GO:0060341	BP	GO:0060341	regulation of cellular localization	1950-09-01	59/1381	0.000162238	0.0181553	0.0159577	ENSGALG00000000209/ENSGALG00000001163/ENSGALG00000001329/ENSGALG00000004357/ENSGALG00000006211/ENSGALG00000010175/ENSGALG00000013624/ENSGALG00000016692/ENSGALG00000016880	9
GO:0006006	BP	GO:0006006	glucose metabolic process	1950-05-01	16/1381	0.000164384	0.0181553	0.0159577	ENSGALG00000002377/ENSGALG00000012638/ENSGALG00000013310/ENSGALG00000014442/ENSGALG00000026077	5
GO:0019318	BP	GO:0019318	hexose metabolic process	1950-05-01	16/1381	0.000164384	0.0181553	0.0159577	ENSGALG00000002377/ENSGALG00000012638/ENSGALG00000013310/ENSGALG00000014442/ENSGALG00000026077	5
GO:0022402	BP	GO:0022402	cell cycle process	1950-11-01	89/1381	0.000199125	0.019793	0.0173972	ENSGALG00000001163/ENSGALG00000002095/ENSGALG00000005302/ENSGALG00000006211/ENSGALG00000006657/ENSGALG00000007447/ENSGALG00000010175/ENSGALG00000014976/ENSGALG00000015148/ENSGALG00000016692/ENSGALG00000027454	11
GO:0007049	BP	GO:0007049	cell cycle	14/50	146/1381	0.000378912	0.0324836	0.0285517	ENSGALG00000001163/ENSGALG00000001329/ENSGALG00000002095/ENSGALG00000005302/ENSGALG00000006211/ENSGALG00000006657/ENSGALG00000007447/ENSGALG00000010175/ENSGALG00000013310/ENSGALG00000013956/ENSGALG00000014976/ENSGALG00000015148/ENSGALG00000016692/ENSGALG00000027454	14
GO:0005996	BP	GO:0005996	monosaccharide metabolic process	1950-05-01	19/1381	0.00040288	0.0324836	0.0285517	ENSGALG00000002377/ENSGALG00000012638/ENSGALG00000013310/ENSGALG00000014442/ENSGALG00000026077	5
GO:0044283	BP	GO:0044283	small molecule biosynthetic process	1950-08-01	53/1381	0.000424835	0.0324836	0.0285517	ENSGALG00000002377/ENSGALG00000004170/ENSGALG00000012638/ENSGALG00000013310/ENSGALG00000014442/ENSGALG00000015148/ENSGALG00000025796/ENSGALG00000026077	8
GO:0007017	BP	GO:0007017	microtubule-based process	1950-08-01	54/1381	0.000485004	0.0344353	0.0302672	ENSGALG00000001163/ENSGALG00000002095/ENSGALG00000005302/ENSGALG00000006657/ENSGALG00000007447/ENSGALG00000010889/ENSGALG00000014442/ENSGALG00000027454	8
GO:0016051	BP	GO:0016051	carbohydrate biosynthetic process	1950-05-01	21/1381	0.000667257	0.0442169	0.0388648	ENSGALG00000002377/ENSGALG00000012638/ENSGALG00000013310/ENSGALG00000014442/ENSGALG00000026077	5
GO:0008104	BP	GO:0008104	protein localization	14/50	158/1381	0.000872255	0.0483285	0.0424787	ENSGALG00000000209/ENSGALG00000001163/ENSGALG00000001329/ENSGALG00000002095/ENSGALG00000006211/ENSGALG00000006657/ENSGALG00000007531/ENSGALG00000010175/ENSGALG00000010889/ENSGALG00000013624/ENSGALG00000014442/ENSGALG00000015148/ENSGALG00000016692/ENSGALG00000016880	14
GO:0034613	BP	GO:0034613	cellular protein localization	1950-11-01	105/1381	0.000875163	0.0483285	0.0424787	ENSGALG00000000209/ENSGALG00000001163/ENSGALG00000001329/ENSGALG00000002095/ENSGALG00000006211/ENSGALG00000006657/ENSGALG00000007531/ENSGALG00000010175/ENSGALG00000013624/ENSGALG00000016692/ENSGALG00000016880	11
GO:0070727	BP	GO:0070727	cellular macromolecule localization	1950-11-01	105/1381	0.000875163	0.0483285	0.0424787	ENSGALG00000000209/ENSGALG00000001163/ENSGALG00000001329/ENSGALG00000002095/ENSGALG00000006211/ENSGALG00000006657/ENSGALG00000007531/ENSGALG00000010175/ENSGALG00000013624/ENSGALG00000016692/ENSGALG00000016880	11
GO:0007010	BP	GO:0007010	cytoskeleton organization	1950-12-01	127/1381	0.00126265	0.0637795	0.0560595	ENSGALG00000001163/ENSGALG00000001329/ENSGALG00000002095/ENSGALG00000004719/ENSGALG00000005302/ENSGALG00000006657/ENSGALG00000007447/ENSGALG00000010889/ENSGALG00000013310/ENSGALG00000014442/ENSGALG00000015148/ENSGALG00000027454	12
GO:0045861	BP	GO:0045861	negative regulation of proteolysis	1950-05-01	24/1381	0.00128329	0.0637795	0.0560595	ENSGALG00000010175/ENSGALG00000014442/ENSGALG00000016880/ENSGALG00000027070/ENSGALG00000027761	5
GO:0006090	BP	GO:0006090	pyruvate metabolic process	1950-04-01	15/1381	0.00154781	0.0674448	0.0592811	ENSGALG00000002377/ENSGALG00000006300/ENSGALG00000014442/ENSGALG00000026077	4
GO:0007051	BP	GO:0007051	spindle organization	1950-04-01	15/1381	0.00154781	0.0674448	0.0592811	ENSGALG00000002095/ENSGALG00000006657/ENSGALG00000007447/ENSGALG00000027454	4
GO:0042110	BP	GO:0042110	T cell activation	1950-05-01	25/1381	0.00156059	0.0674448	0.0592811	ENSGALG00000000209/ENSGALG00000004170/ENSGALG00000007416/ENSGALG00000013624/ENSGALG00000015148	5
GO:0000776	CC	GO:0000776	kinetochore	1954-05-01	17/1435	0.000274649	0.0447678	0.0410528	ENSGALG00000001163/ENSGALG00000005038/ENSGALG00000016609/ENSGALG00000016692/ENSGALG00000027454	5
GO:0008092	MF	GO:0008092	cytoskeletal protein binding	1945-11-01	99/1269	0.000404856	0.0327762	0.0310045	ENSGALG00000000209/ENSGALG00000001163/ENSGALG00000001329/ENSGALG00000004357/ENSGALG00000004719/ENSGALG00000005644/ENSGALG00000006657/ENSGALG00000010889/ENSGALG00000013310/ENSGALG00000014442/ENSGALG00000015022	11
GO:0015631	MF	GO:0015631	tubulin binding	1945-06-01	30/1269	0.000442922	0.0327762	0.0310045	ENSGALG00000000209/ENSGALG00000001163/ENSGALG00000006657/ENSGALG00000010889/ENSGALG00000014442/ENSGALG00000015022	6
GO:0008017	MF	GO:0008017	microtubule binding	1945-05-01	23/1269	0.000934492	0.0461016	0.0436096	ENSGALG00000000209/ENSGALG00000001163/ENSGALG00000006657/ENSGALG00000010889/ENSGALG00000014442	5

## Sheet: GO_T15 vs T6
	Ontology	ID	Description	Gene Ratio	Bg Ratio	pvalue	p.adjust	qvalue	Gene ID	Count
GO:0031410	CC	GO:0031410	cytoplasmic vesicle	2020-05-07	126/1435	8.80026e-05	0.00294998	0.0027559	ENSGALG00000004170/ENSGALG00000006211/ENSGALG00000007531/ENSGALG00000010175/ENSGALG00000016669	5
GO:0097708	CC	GO:0097708	intracellular vesicle	2020-05-07	126/1435	8.80026e-05	0.00294998	0.0027559	ENSGALG00000004170/ENSGALG00000006211/ENSGALG00000007531/ENSGALG00000010175/ENSGALG00000016669	5
GO:0031982	CC	GO:0031982	vesicle	2020-05-07	132/1435	0.000110624	0.00294998	0.0027559	ENSGALG00000004170/ENSGALG00000006211/ENSGALG00000007531/ENSGALG00000010175/ENSGALG00000016669	5
GO:0000323	CC	GO:0000323	lytic vacuole	2020-02-07	26/1435	0.00627182	0.096807	0.0904382	ENSGALG00000004170/ENSGALG00000006323	2
GO:0005764	CC	GO:0005764	lysosome	2020-02-07	26/1435	0.00627182	0.096807	0.0904382	ENSGALG00000004170/ENSGALG00000006323	2
GO:0099503	CC	GO:0099503	secretory vesicle	2020-02-07	28/1435	0.00726053	0.096807	0.0904382	ENSGALG00000006211/ENSGALG00000016669	2
