# Supplementary material for: Transcriptome-based biomarker gene screening and evaluation of the extracellular fatty acid-binding protein (Ex-FABP) on immune and angiogenesis-related genes in chicken erythrocytes of tibial dyschondroplasia
Source: BMC Genomics. 2022 Apr 22;23:323. doi: 10.1186/s12864-022-08494-9 (PMC9034513; doi:10.1186/s12864-022-08494-9)
Supplement: Supplementary file 9 — Additional file 9. [file 12864_2022_8494_MOESM9_ESM.xlsx]

## Sheet: KEGG_T6 vs T2
Additional file 9. KEGG pathways of differentially expressed genes under likelihood ration
	ID	Description	Gene Ratio	Bg Ratio	pvalue	p.adjust	qvalue	Gene ID	Count
gga04621	gga04621	NOD-like receptor signaling pathway	1955-06-01	128/5019	0.00254781	0.133544	0.126858	415905/771952/373954/396188/395840/420407	6
gga01230	gga01230	Biosynthesis of amino acids	1955-04-01	59/5019	0.00375929	0.133544	0.126858	415991/374193/417185/395492	4
gga01200	gga01200	Carbon metabolism	1955-05-01	102/5019	0.00488574	0.133544	0.126858	415991/423347/426429/374193/395492	5
gga03460	gga03460	Fanconi anemia pathway	1955-03-01	50/5019	0.0169738	0.257588	0.244692	415577/422892/418628	3
gga00531	gga00531	Glycosaminoglycan degradation	1955-02-01	19/5019	0.0178952	0.257588	0.244692	422490/427204	2
gga00010	gga00010	Glycolysis / Gluconeogenesis	1955-03-01	52/5019	0.0188479	0.257588	0.244692	423347/374193/395492	3
gga00030	gga00030	Pentose phosphate pathway	1955-02-01	25/5019	0.0301105	0.352723	0.335064	415991/395492	2
gga04068	gga04068	FoxO signaling pathway	1955-04-01	122/5019	0.0437811	0.448756	0.426289	420148/422497/426054/378914	4
gga04914	gga04914	Progesterone-mediated oocyte maturation	1955-03-01	78/5019	0.0532323	0.485005	0.460724	428167/396188/422675	3
gga04110	gga04110	Cell cycle	1955-03-01	116/5019	0.1334	0.667988	0.634546	422675/418739/378914	3
gga00603	gga00603	Glycosphingolipid biosynthesis - globo and isoglobo series	1955-01-01	13/5019	0.133608	0.667988	0.634546	427204	1
gga04142	gga04142	Lysosome	1955-03-01	119/5019	0.140945	0.667988	0.634546	422490/427204/424540	3
gga00604	gga00604	Glycosphingolipid biosynthesis - ganglio series	1955-01-01	15/5019	0.152543	0.667988	0.634546	427204	1
gga00533	gga00533	Glycosaminoglycan biosynthesis - keratan sulfate	1955-01-01	16/5019	0.161857	0.667988	0.634546	421286	1
gga04140	gga04140	Autophagy - animal	1955-03-01	128/5019	0.164412	0.667988	0.634546	769066/415905/373954	3
gga04115	gga04115	p53 signaling pathway	1955-02-01	67/5019	0.166591	0.667988	0.634546	373954/378914	2
gga00061	gga00061	Fatty acid biosynthesis	1955-01-01	17/5019	0.171071	0.667988	0.634546	416324	1
gga00220	gga00220	Arginine biosynthesis	1955-01-01	17/5019	0.171071	0.667988	0.634546	417185	1
gga00511	gga00511	Other glycan degradation	1955-01-01	18/5019	0.180186	0.667988	0.634546	427204	1
gga04218	gga04218	Cellular senescence	1955-03-01	144/5019	0.208712	0.667988	0.634546	426773/421316/378914	3
gga04012	gga04012	ErbB signaling pathway	1955-02-01	78/5019	0.210256	0.667988	0.634546	426773/378914	2
gga00601	gga00601	Glycosphingolipid biosynthesis - lacto and neolacto series	1955-01-01	24/5019	0.232843	0.667988	0.634546	421286	1
gga03060	gga03060	Protein export	1955-01-01	24/5019	0.232843	0.667988	0.634546	421774	1
gga04912	gga04912	GnRH signaling pathway	1955-02-01	84/5019	0.234571	0.667988	0.634546	415905/427144	2
gga04625	gga04625	C-type lectin receptor signaling pathway	1955-02-01	88/5019	0.250885	0.667988	0.634546	415905/374254	2
gga00020	gga00020	Citrate cycle (TCA cycle)	1955-01-01	28/5019	0.266087	0.667988	0.634546	426429	1
gga00564	gga00564	Glycerophospholipid metabolism	1955-02-01	95/5019	0.279512	0.667988	0.634546	421375/420826	2
gga00630	gga00630	Glyoxylate and dicarboxylate metabolism	1955-01-01	31/5019	0.290088	0.667988	0.634546	423347	1
gga04114	gga04114	Oocyte meiosis	1955-02-01	99/5019	0.29586	0.667988	0.634546	428167/422675	2
gga00620	gga00620	Pyruvate metabolism	1955-01-01	32/5019	0.297916	0.667988	0.634546	423347	1
gga00640	gga00640	Propanoate metabolism	1955-01-01	32/5019	0.297916	0.667988	0.634546	423347	1
gga00071	gga00071	Fatty acid degradation	1955-01-01	33/5019	0.305659	0.667988	0.634546	416324	1
gga00250	gga00250	Alanine, aspartate and glutamate metabolism	1955-01-01	34/5019	0.313318	0.667988	0.634546	417185	1
gga04216	gga04216	Ferroptosis	1955-01-01	34/5019	0.313318	0.667988	0.634546	416324	1
gga00051	gga00051	Fructose and mannose metabolism	1955-01-01	35/5019	0.320895	0.667988	0.634546	395492	1
gga00760	gga00760	Nicotinate and nicotinamide metabolism	1955-01-01	35/5019	0.320895	0.667988	0.634546	422983	1
gga00982	gga00982	Drug metabolism - cytochrome P450	1955-01-01	35/5019	0.320895	0.667988	0.634546	414896	1
gga04020	gga04020	Calcium signaling pathway	1955-03-01	188/5019	0.339919	0.667988	0.634546	771952/415741/101750705	3
gga00980	gga00980	Metabolism of xenobiotics by cytochrome P450	1955-01-01	38/5019	0.343134	0.667988	0.634546	414896	1
gga03022	gga03022	Basal transcription factors	1955-01-01	38/5019	0.343134	0.667988	0.634546	421086	1
gga03440	gga03440	Homologous recombination	1955-01-01	38/5019	0.343134	0.667988	0.634546	415577	1
gga04810	gga04810	Regulation of actin cytoskeleton	1955-03-01	192/5019	0.352068	0.667988	0.634546	396133/396181/427211	3
gga00513	gga00513	Various types of N-glycan biosynthesis	1955-01-01	41/5019	0.364659	0.667988	0.634546	427204	1
gga00330	gga00330	Arginine and proline metabolism	1955-01-01	42/5019	0.371678	0.667988	0.634546	770734	1
gga05132	gga05132	Salmonella infection	1955-03-01	199/5019	0.37328	0.667988	0.634546	386580/396188/374193	3
gga00270	gga00270	Cysteine and methionine metabolism	1955-01-01	43/5019	0.378622	0.667988	0.634546	421918	1
gga04910	gga04910	Insulin signaling pathway	1955-02-01	122/5019	0.388262	0.667988	0.634546	426773/415741	2
gga04514	gga04514	Cell adhesion molecules	1955-02-01	127/5019	0.407743	0.667988	0.634546	386580/396181	2
gga00480	gga00480	Glutathione metabolism	1955-01-01	48/5019	0.412225	0.667988	0.634546	414896	1
gga00520	gga00520	Amino sugar and nucleotide sugar metabolism	1955-01-01	48/5019	0.412225	0.667988	0.634546	427204	1
gga04217	gga04217	Necroptosis	1955-02-01	129/5019	0.415456	0.667988	0.634546	396188/426361	2
gga01212	gga01212	Fatty acid metabolism	1955-01-01	53/5019	0.444042	0.694548	0.659776	416324	1
gga04622	gga04622	RIG-I-like receptor signaling pathway	1955-01-01	57/5019	0.468273	0.694548	0.659776	427144	1
gga00561	gga00561	Glycerolipid metabolism	1955-01-01	60/5019	0.485762	0.694548	0.659776	420826	1
gga00983	gga00983	Drug metabolism - other enzymes	1955-01-01	60/5019	0.485762	0.694548	0.659776	414896	1
gga04137	gga04137	Mitophagy - animal	1955-01-01	61/5019	0.491466	0.694548	0.659776	373954	1
gga05168	gga05168	Herpes simplex virus 1 infection	1955-02-01	152/5019	0.500363	0.694548	0.659776	426773/373954	2
gga03320	gga03320	PPAR signaling pathway	1955-01-01	63/5019	0.502687	0.694548	0.659776	416324	1
gga04141	gga04141	Protein processing in endoplasmic reticulum	1955-02-01	153/5019	0.503881	0.694548	0.659776	396188/421774	2
gga04920	gga04920	Adipocytokine signaling pathway	1955-01-01	64/5019	0.508206	0.694548	0.659776	416324	1
gga04520	gga04520	Adherens junction	1955-01-01	71/5019	0.54519	0.725516	0.689193	427947	1
gga04010	gga04010	MAPK signaling pathway	1955-03-01	260/5019	0.548561	0.725516	0.689193	396406/422380/427144	3
gga04146	gga04146	Peroxisome	1955-01-01	79/5019	0.584122	0.753868	0.716126	416324	1
gga04512	gga04512	ECM-receptor interaction	1955-01-01	84/5019	0.606772	0.753868	0.716126	396133	1
gga04540	gga04540	Gap junction	1955-01-01	84/5019	0.606772	0.753868	0.716126	101750705	1
gga04620	gga04620	Toll-like receptor signaling pathway	1955-01-01	84/5019	0.606772	0.753868	0.716126	418638	1
gga04350	gga04350	TGF-beta signaling pathway	1955-01-01	92/5019	0.640517	0.783917	0.74467	418739	1
gga04060	gga04060	Cytokine-cytokine receptor interaction	1955-02-01	202/5019	0.656347	0.791478	0.751853	396406/426054	2
gga04144	gga04144	Endocytosis	1955-02-01	228/5019	0.721197	0.823293	0.782076	423839/416361	2
gga04080	gga04080	Neuroactive ligand-receptor interaction	1955-03-01	339/5019	0.728687	0.823293	0.782076	771952/101750705/429171	3
gga04270	gga04270	Vascular smooth muscle contraction	1955-01-01	121/5019	0.740648	0.823293	0.782076	415905	1
gga04371	gga04371	Apelin signaling pathway	1955-01-01	122/5019	0.74356	0.823293	0.782076	420148	1
gga04210	gga04210	Apoptosis	1955-01-01	125/5019	0.752106	0.823293	0.782076	373954	1
gga04261	gga04261	Adrenergic signaling in cardiomyocytes	1955-01-01	127/5019	0.757647	0.823293	0.782076	101750705	1
gga00230	gga00230	Purine metabolism	1955-01-01	128/5019	0.760372	0.823293	0.782076	419194	1
gga04120	gga04120	Ubiquitin mediated proteolysis	1955-01-01	133/5019	0.773551	0.823293	0.782076	427144	1
gga04145	gga04145	Phagosome	1955-01-01	138/5019	0.786017	0.823293	0.782076	396181	1
gga05164	gga05164	Influenza A	1955-01-01	140/5019	0.790813	0.823293	0.782076	418638	1
gga04150	gga04150	mTOR signaling pathway	1955-01-01	143/5019	0.797809	0.823293	0.782076	426773	1
gga03013	gga03013	RNA transport	1955-01-01	146/5019	0.804576	0.823293	0.782076	426773	1
gga04530	gga04530	Tight junction	1955-01-01	150/5019	0.813253	0.823293	0.782076	427144	1
gga04510	gga04510	Focal adhesion	1955-01-01	191/5019	0.883014	0.883014	0.838807	396133	1

## Sheet: KEGG_T15 vs T2
	ID	Description	Gene Ratio	Bg Ratio	pvalue	p.adjust	qvalue	GeneID	Count
gga04210	gga04210	Apoptosis	1985-09-01	125/5019	0.000230552	0.0209803	0.0189296	425657/374234/373954/395280/374078/418212/693255/396093/396512	9
gga00010	gga00010	Glycolysis / Gluconeogenesis	1985-05-01	52/5019	0.00172156	0.0783311	0.0706747	396017/396221/423347/374193/395492	5
gga01230	gga01230	Biosynthesis of amino acids	1985-05-01	59/5019	0.00302318	0.0917032	0.0827398	396017/415991/417253/374193/395492	5
gga04621	gga04621	NOD-like receptor signaling pathway	1985-07-01	128/5019	0.00564219	0.12836	0.115813	415905/771952/373954/395280/396188/418212/396093	7
gga01200	gga01200	Carbon metabolism	1985-06-01	102/5019	0.00727514	0.132408	0.119465	396017/415991/423347/426429/374193/395492	6
gga04625	gga04625	C-type lectin receptor signaling pathway	1985-05-01	88/5019	0.0161588	0.212435	0.191671	415905/374254/418212/396093/429451	5
gga04068	gga04068	FoxO signaling pathway	1985-06-01	122/5019	0.0167179	0.212435	0.191671	420148/416667/422497/426054/693255/378914	6
gga05132	gga05132	Salmonella infection	1985-08-01	199/5019	0.0186756	0.212435	0.191671	386580/416246/416861/378913/396188/374193/396093/396512	8
gga04010	gga04010	MAPK signaling pathway	1985-09-01	260/5019	0.030688	0.28713	0.259064	415917/429269/378913/396406/422380/418044/427144/693255/396512	9
gga04520	gga04520	Adherens junction	1985-04-01	71/5019	0.0315527	0.28713	0.259064	416667/418044/427947/396294	4
gga00531	gga00531	Glycosaminoglycan degradation	1985-02-01	19/5019	0.0402253	0.321659	0.290219	771459/427204	2
gga04810	gga04810	Regulation of actin cytoskeleton	1985-07-01	192/5019	0.0430029	0.321659	0.290219	396465/396133/416246/396181/418044/427211/417584	7
gga04110	gga04110	Cell cycle	1985-05-01	116/5019	0.0459513	0.321659	0.290219	416667/422675/418739/693255/378914	5
gga04142	gga04142	Lysosome	1985-05-01	119/5019	0.0503333	0.327166	0.295188	425657/771433/771459/427204/424540	5
gga00030	gga00030	Pentose phosphate pathway	1985-02-01	25/5019	0.0661381	0.379185	0.342122	415991/395492	2
gga04217	gga04217	Necroptosis	1985-05-01	129/5019	0.06667	0.379185	0.342122	419150/395280/417253/396188/426361	5
gga04218	gga04218	Cellular senescence	1985-05-01	144/5019	0.0961113	0.450212	0.406206	426773/421316/418212/693255/378914	5
gga00630	gga00630	Glyoxylate and dicarboxylate metabolism	1985-02-01	31/5019	0.0961264	0.450212	0.406206	417253/423347	2
gga00620	gga00620	Pyruvate metabolism	1985-02-01	32/5019	0.101447	0.450212	0.406206	396221/423347	2
gga00640	gga00640	Propanoate metabolism	1985-02-01	32/5019	0.101447	0.450212	0.406206	396221/423347	2
gga04115	gga04115	p53 signaling pathway	1985-03-01	67/5019	0.103895	0.450212	0.406206	373954/693255/378914	3
gga04216	gga04216	Ferroptosis	1985-02-01	34/5019	0.112323	0.464611	0.419198	396452/416324	2
gga04270	gga04270	Vascular smooth muscle contraction	1985-04-01	121/5019	0.148147	0.571389	0.515539	396465/415905/374065/418212	4
gga00270	gga00270	Cysteine and methionine metabolism	1985-02-01	43/5019	0.164402	0.571389	0.515539	396221/421918	2
gga04540	gga04540	Gap junction	1985-03-01	84/5019	0.169533	0.571389	0.515539	396427/101750705/418212	3
gga04620	gga04620	Toll-like receptor signaling pathway	1985-03-01	84/5019	0.169533	0.571389	0.515539	418638/396093/396512	3
gga04912	gga04912	GnRH signaling pathway	1985-03-01	84/5019	0.169533	0.571389	0.515539	415905/418212/427144	3
gga00603	gga00603	Glycosphingolipid biosynthesis - globo and isoglobo series	1985-01-01	13/5019	0.199339	0.571688	0.515809	427204	1
gga04145	gga04145	Phagosome	1985-04-01	138/5019	0.205082	0.571688	0.515809	693256/425657/396427/396181	4
gga04330	gga04330	Notch signaling pathway	1985-02-01	50/5019	0.20731	0.571688	0.515809	416815/416667	2
gga05164	gga05164	Influenza A	1985-04-01	140/5019	0.212177	0.571688	0.515809	693256/416667/418638/396093	4
gga04510	gga04510	Focal adhesion	1985-05-01	191/5019	0.221622	0.571688	0.515809	396133/378913/395280/418044/396294	5
gga00604	gga00604	Glycosphingolipid biosynthesis - ganglio series	1985-01-01	15/5019	0.2263	0.571688	0.515809	427204	1
gga00533	gga00533	Glycosaminoglycan biosynthesis - keratan sulfate	1985-01-01	16/5019	0.239443	0.571688	0.515809	421286	1
gga04622	gga04622	RIG-I-like receptor signaling pathway	1985-02-01	57/5019	0.251258	0.571688	0.515809	427144/396093	2
gga00061	gga00061	Fatty acid biosynthesis	1985-01-01	17/5019	0.252364	0.571688	0.515809	416324	1
gga00220	gga00220	Arginine biosynthesis	1985-01-01	17/5019	0.252364	0.571688	0.515809	417253	1
gga00910	gga00910	Nitrogen metabolism	1985-01-01	17/5019	0.252364	0.571688	0.515809	417253	1
gga05168	gga05168	Herpes simplex virus 1 infection	1985-04-01	152/5019	0.256088	0.571688	0.515809	693256/426773/373954/396093	4
gga04060	gga04060	Cytokine-cytokine receptor interaction	1985-05-01	202/5019	0.256447	0.571688	0.515809	419620/396406/426054/422062/425564	5
gga04370	gga04370	VEGF signaling pathway	1985-02-01	58/5019	0.257574	0.571688	0.515809	415917/418044	2
gga00511	gga00511	Other glycan degradation	1985-01-01	18/5019	0.265069	0.574316	0.51818	427204	1
gga04920	gga04920	Adipocytokine signaling pathway	1985-02-01	64/5019	0.295475	0.625308	0.564187	416324/396093	2
gga00601	gga00601	Glycosphingolipid biosynthesis - lacto and neolacto series	1985-01-01	24/5019	0.336938	0.669201	0.60379	421286	1
gga03060	gga03060	Protein export	1985-01-01	24/5019	0.336938	0.669201	0.60379	421774	1
gga04910	gga04910	Insulin signaling pathway	1985-03-01	122/5019	0.341522	0.669201	0.60379	426773/429269/415741	3
gga04514	gga04514	Cell adhesion molecules	1985-03-01	127/5019	0.364871	0.669201	0.60379	693256/386580/396181	3
gga00230	gga00230	Purine metabolism	1985-03-01	128/5019	0.369529	0.669201	0.60379	419194/423826/424700	3
gga04140	gga04140	Autophagy - animal	1985-03-01	128/5019	0.369529	0.669201	0.60379	769066/415905/373954	3
gga00020	gga00020	Citrate cycle (TCA cycle)	1985-01-01	28/5019	0.380945	0.669201	0.60379	426429	1
gga04012	gga04012	ErbB signaling pathway	1985-02-01	78/5019	0.3824	0.669201	0.60379	426773/378914	2
gga04914	gga04914	Progesterone-mediated oocyte maturation	1985-02-01	78/5019	0.3824	0.669201	0.60379	396188/422675	2
gga04020	gga04020	Calcium signaling pathway	1985-04-01	188/5019	0.394939	0.678103	0.611823	771952/415741/101750705/418212	4
gga00071	gga00071	Fatty acid degradation	1985-01-01	33/5019	0.431914	0.684558	0.617646	416324	1
gga00250	gga00250	Alanine, aspartate and glutamate metabolism	1985-01-01	34/5019	0.441599	0.684558	0.617646	417253	1
gga00051	gga00051	Fructose and mannose metabolism	1985-01-01	35/5019	0.45112	0.684558	0.617646	395492	1
gga00760	gga00760	Nicotinate and nicotinamide metabolism	1985-01-01	35/5019	0.45112	0.684558	0.617646	422983	1
gga00982	gga00982	Drug metabolism - cytochrome P450	1985-01-01	35/5019	0.45112	0.684558	0.617646	414896	1
gga03013	gga03013	RNA transport	1985-03-01	146/5019	0.451927	0.684558	0.617646	426773/416246/373930	3
gga04350	gga04350	TGF-beta signaling pathway	1985-02-01	92/5019	0.464642	0.684558	0.617646	416667/418739	2
gga00980	gga00980	Metabolism of xenobiotics by cytochrome P450	1985-01-01	38/5019	0.478732	0.684558	0.617646	414896	1
gga03022	gga03022	Basal transcription factors	1985-01-01	38/5019	0.478732	0.684558	0.617646	421086	1
gga04672	gga04672	Intestinal immune network for IgA production	1985-01-01	38/5019	0.478732	0.684558	0.617646	693256	1
gga00564	gga00564	Glycerophospholipid metabolism	1985-02-01	95/5019	0.481447	0.684558	0.617646	421375/420826	2
gga04114	gga04114	Oocyte meiosis	1985-02-01	99/5019	0.503354	0.696248	0.628193	422675/418212	2
gga00513	gga00513	Various types of N-glycan biosynthesis	1985-01-01	41/5019	0.504971	0.696248	0.628193	427204	1
gga00330	gga00330	Arginine and proline metabolism	1985-01-01	42/5019	0.513423	0.697336	0.629176	770734	1
gga04623	gga04623	Cytosolic DNA-sensing pathway	1985-01-01	44/5019	0.529903	0.709135	0.639821	396093	1
gga04144	gga04144	Endocytosis	1985-04-01	228/5019	0.54447	0.718069	0.647882	419150/423839/416361/417584	4
gga00480	gga00480	Glutathione metabolism	1985-01-01	48/5019	0.561226	0.719317	0.649008	414896	1
gga00520	gga00520	Amino sugar and nucleotide sugar metabolism	1985-01-01	48/5019	0.561226	0.719317	0.649008	427204	1
gga03460	gga03460	Fanconi anemia pathway	1985-01-01	50/5019	0.576104	0.728132	0.656961	422892	1
gga01212	gga01212	Fatty acid metabolism	1985-01-01	53/5019	0.597492	0.744819	0.672017	416324	1
gga04371	gga04371	Apelin signaling pathway	1985-02-01	122/5019	0.617392	0.755889	0.682005	420148/418212	2
gga00240	gga00240	Pyrimidine metabolism	1985-01-01	59/5019	0.637119	0.755889	0.682005	423826	1
gga00561	gga00561	Glycerolipid metabolism	1985-01-01	60/5019	0.643338	0.755889	0.682005	420826	1
gga00983	gga00983	Drug metabolism - other enzymes	1985-01-01	60/5019	0.643338	0.755889	0.682005	414896	1
gga04137	gga04137	Mitophagy - animal	1985-01-01	61/5019	0.649451	0.755889	0.682005	373954	1
gga03320	gga03320	PPAR signaling pathway	1985-01-01	63/5019	0.661369	0.755889	0.682005	416324	1
gga04120	gga04120	Ubiquitin mediated proteolysis	1985-02-01	133/5019	0.664518	0.755889	0.682005	395280/427144	2
gga04310	gga04310	Wnt signaling pathway	1985-02-01	142/5019	0.699564	0.776844	0.700912	416667/418044	2
gga03018	gga03018	RNA degradation	1985-01-01	70/5019	0.700013	0.776844	0.700912	396017	1
gga04530	gga04530	Tight junction	1985-02-01	150/5019	0.728158	0.795827	0.71804	396465/427144	2
gga04141	gga04141	Protein processing in endoplasmic reticulum	1985-02-01	153/5019	0.738281	0.795827	0.71804	396188/421774	2
gga04146	gga04146	Peroxisome	1985-01-01	79/5019	0.743355	0.795827	0.71804	416324	1
gga04512	gga04512	ECM-receptor interaction	1985-01-01	84/5019	0.764697	0.809156	0.730065	396133	1
gga04070	gga04070	Phosphatidylinositol signaling system	1985-01-01	89/5019	0.784282	0.818646	0.738628	418212	1
gga04916	gga04916	Melanogenesis	1985-01-01	91/5019	0.791657	0.818646	0.738628	416667	1
gga04080	gga04080	Neuroactive ligand-receptor interaction	1985-04-01	339/5019	0.836085	0.854874	0.771314	419914/771952/101750705/429171	4
gga04261	gga04261	Adrenergic signaling in cardiomyocytes	1985-01-01	127/5019	0.888885	0.898761	0.810912	101750705	1
gga04150	gga04150	mTOR signaling pathway	1985-01-01	143/5019	0.916095	0.916095	0.826552	426773	1

## Sheet: KEGG_T15 vs T6
	ID	Description	Gene Ratio	Bg Ratio	pvalue	p.adjust	qvalue	Gene ID	Count
gga04621	gga04621	NOD-like receptor signaling pathway	2020-03-07	128/5019	0.000526187	0.00789281	0.00720046	373954/396188/395840	3
gga00531	gga00531	Glycosaminoglycan degradation	2020-01-07	19/5019	0.0262157	0.196618	0.179371	422490	1
gga03022	gga03022	Basal transcription factors	2020-01-07	38/5019	0.0518402	0.224933	0.205202	421086	1
gga04137	gga04137	Mitophagy - animal	2020-01-07	61/5019	0.0820841	0.224933	0.205202	373954	1
gga04115	gga04115	p53 signaling pathway	2020-01-07	67/5019	0.0898364	0.224933	0.205202	373954	1
gga04914	gga04914	Progesterone-mediated oocyte maturation	2020-01-07	78/5019	0.103903	0.224933	0.205202	396188	1
gga04142	gga04142	Lysosome	2020-01-07	119/5019	0.154706	0.224933	0.205202	422490	1
gga04210	gga04210	Apoptosis	2020-01-07	125/5019	0.161929	0.224933	0.205202	373954	1
gga00230	gga00230	Purine metabolism	2020-01-07	128/5019	0.16552	0.224933	0.205202	419194	1
gga04140	gga04140	Autophagy - animal	2020-01-07	128/5019	0.16552	0.224933	0.205202	373954	1
gga04217	gga04217	Necroptosis	2020-01-07	129/5019	0.166715	0.224933	0.205202	396188	1
gga05168	gga05168	Herpes simplex virus 1 infection	2020-01-07	152/5019	0.193782	0.224933	0.205202	373954	1
gga04141	gga04141	Protein processing in endoplasmic reticulum	2020-01-07	153/5019	0.194942	0.224933	0.205202	396188	1
gga05132	gga05132	Salmonella infection	2020-01-07	199/5019	0.246759	0.264385	0.241193	396188	1
gga04144	gga04144	Endocytosis	2020-01-07	228/5019	0.277935	0.277935	0.253555	423839	1
