# Supplementary material for: Transcriptome-based biomarker gene screening and evaluation of the extracellular fatty acid-binding protein (Ex-FABP) on immune and angiogenesis-related genes in chicken erythrocytes of tibial dyschondroplasia
Source: BMC Genomics. 2022 Apr 22;23:323. doi: 10.1186/s12864-022-08494-9 (PMC9034513; doi:10.1186/s12864-022-08494-9)
Supplement: Supplementary file 13 — Additional file 13. [file 12864_2022_8494_MOESM13_ESM.xlsx]

## Sheet: string_interactions
Additional file 13. Protein-protein interaction of immunity and angiogenesis-related genes
#node1	node2	node1_string_internal_id	node2_string_internal_id	node1_external_id	node2_external_id	neighborhood_on_chromosome	gene_fusion	phylogenetic_cooccurrence	homology	coexpression	experimentally_determined_interaction	database_annotated	automated_textmining	combined_score
MYD88	TRAF6	3999857	3990001	9031.ENSGALP00000042597	9031.ENSGALP00000012873	0	0	0	0	0.057	0.872	0.9	0.964	0.999
TRAF6	TLR4	3990001	3989441	9031.ENSGALP00000012873	9031.ENSGALP00000011319	0	0	0	0	0.058	0.873	0.9	0.784	0.997
ITGAV	ITGB3	3986706	3985320	9031.ENSGALP00000004173	9031.ENSGALP00000000518	0	0	0	0	0.059	0.865	0.9	0.732	0.996
MYD88	IL1R1	3999857	3995213	9031.ENSGALP00000042597	9031.ENSGALP00000027049	0	0	0	0	0.056	0.824	0.9	0.76	0.995
MYD88	TLR2-2	3999857	3997382	9031.ENSGALP00000042597	9031.ENSGALP00000038134	0	0	0	0	0.064	0.369	0.8	0.95	0.993
MYD88	TLR7	3999857	3996821	9031.ENSGALP00000042597	9031.ENSGALP00000035830	0	0	0	0	0.074	0.369	0.9	0.89	0.992
IL1R1	TRAF6	3995213	3990001	9031.ENSGALP00000027049	9031.ENSGALP00000012873	0	0	0	0	0	0.82	0.9	0.639	0.992
MYD88	TLR4	3999857	3989441	9031.ENSGALP00000042597	9031.ENSGALP00000011319	0	0	0	0.582	0.056	0.873	0.8	0.956	0.984
MYD88	TLR5	3999857	3990915	9031.ENSGALP00000042597	9031.ENSGALP00000015286	0	0	0	0	0.057	0.369	0.8	0.864	0.981
ITGB2	ITGAV	3989744	3986706	9031.ENSGALP00000012130	9031.ENSGALP00000004173	0	0	0	0	0.083	0.455	0.9	0.438	0.968
TLR7	TRAF6	3996821	3990001	9031.ENSGALP00000035830	9031.ENSGALP00000012873	0	0	0	0	0	0.163	0.9	0.621	0.965
TLR3	MYD88	4000300	3999857	9031.ENSGALP00000043092	9031.ENSGALP00000042597	0	0	0	0	0.067	0.369	0	0.945	0.964
TLR3	TRAF6	4000300	3990001	9031.ENSGALP00000043092	9031.ENSGALP00000012873	0	0	0	0	0	0.874	0	0.73	0.964
ITGA2	ITGB3	3994004	3985320	9031.ENSGALP00000023991	9031.ENSGALP00000000518	0	0	0	0	0.059	0.355	0.8	0.581	0.942
TLR3	TLR7	4000300	3996821	9031.ENSGALP00000043092	9031.ENSGALP00000035830	0	0	0	0.621	0.113	0	0.9	0.941	0.94
RAP1B	ITGB3	3991235	3985320	9031.ENSGALP00000016120	9031.ENSGALP00000000518	0	0	0	0	0.087	0.163	0.9	0.146	0.926
TLR2-2	TLR5	3997382	3990915	9031.ENSGALP00000038134	9031.ENSGALP00000015286	0	0	0	0	0.059	0	0	0.916	0.918
TLR2-2	TLR7	3997382	3996821	9031.ENSGALP00000038134	9031.ENSGALP00000035830	0	0	0	0	0.066	0	0	0.911	0.914
GIT1	FYN	3997579	3994087	9031.ENSGALP00000038832	9031.ENSGALP00000024180	0	0	0	0	0.053	0.096	0.9	0.078	0.91
RAC2	IQGAP2	3997116	3994054	9031.ENSGALP00000037001	9031.ENSGALP00000024116	0	0	0	0	0.086	0.309	0.8	0.295	0.899
TLR7	TLR4	3996821	3989441	9031.ENSGALP00000035830	9031.ENSGALP00000011319	0	0	0	0.591	0.787	0	0	0.904	0.865
RAC2	ITGB2	3997116	3989744	9031.ENSGALP00000037001	9031.ENSGALP00000012130	0	0	0	0	0.796	0.068	0	0.227	0.84
VAV1	FYN	3999038	3994087	9031.ENSGALP00000041692	9031.ENSGALP00000024180	0	0	0	0	0.058	0.164	0	0.792	0.821
ITGB2	TLR4	3989744	3989441	9031.ENSGALP00000012130	9031.ENSGALP00000011319	0	0	0	0	0.784	0.06	0	0.169	0.817
TLR7	ITGB2	3996821	3989744	9031.ENSGALP00000035830	9031.ENSGALP00000012130	0	0	0	0	0.772	0.06	0	0.104	0.791
TLR2-2	TLR15	3997382	3990158	9031.ENSGALP00000038134	9031.ENSGALP00000013260	0	0	0	0	0	0	0	0.79	0.79
RAC2	TLR7	3997116	3996821	9031.ENSGALP00000037001	9031.ENSGALP00000035830	0	0	0	0	0.753	0.113	0	0.101	0.786
MYD88	TLR15	3999857	3990158	9031.ENSGALP00000042597	9031.ENSGALP00000013260	0	0	0	0	0	0.369	0	0.673	0.785
TLR2-2	TRAF6	3997382	3990001	9031.ENSGALP00000038134	9031.ENSGALP00000012873	0	0	0	0	0	0.163	0	0.671	0.713
VAV1	RAC2	3999038	3997116	9031.ENSGALP00000041692	9031.ENSGALP00000037001	0	0	0	0	0.124	0.581	0	0.219	0.688
TLR5	TRAF6	3990915	3990001	9031.ENSGALP00000015286	9031.ENSGALP00000012873	0	0	0	0	0	0.163	0	0.602	0.653
IL1R1	TLR4	3995213	3989441	9031.ENSGALP00000027049	9031.ENSGALP00000011319	0	0	0	0	0.057	0	0	0.613	0.619
RAC2	TLR4	3997116	3989441	9031.ENSGALP00000037001	9031.ENSGALP00000011319	0	0	0	0	0.505	0.113	0	0.173	0.605
ITGB2	BLB2	3989744	3988523	9031.ENSGALP00000012130	9031.ENSGALP00000008911	0	0	0	0	0.568	0	0	0	0.568
TLR3	IL1R1	4000300	3995213	9031.ENSGALP00000043092	9031.ENSGALP00000027049	0	0	0	0	0	0	0	0.534	0.534
ITGA2	ITGB2	3994004	3989744	9031.ENSGALP00000023991	9031.ENSGALP00000012130	0	0	0	0	0.059	0.355	0	0.279	0.524
TLR3	IL7	4000300	3996838	9031.ENSGALP00000043092	9031.ENSGALP00000035870	0	0	0	0	0	0	0	0.512	0.512
RAC2	RAP1B	3997116	3991235	9031.ENSGALP00000037001	9031.ENSGALP00000016120	0	0	0.325	0.78	0.095	0.369	0	0.576	0.511
TLR15	TLR4	3990158	3989441	9031.ENSGALP00000013260	9031.ENSGALP00000011319	0	0	0	0.582	0.302	0	0	0.688	0.498
TLR2-2	TLR4	3997382	3989441	9031.ENSGALP00000038134	9031.ENSGALP00000011319	0	0	0	0.555	0.096	0	0	0.97	0.485
TLR5	TLR4	3990915	3989441	9031.ENSGALP00000015286	9031.ENSGALP00000011319	0	0	0	0.593	0.058	0.161	0	0.893	0.474
TLR15	TRAF6	3990158	3990001	9031.ENSGALP00000013260	9031.ENSGALP00000012873	0	0	0	0	0	0.163	0	0.391	0.469
RAC2	BLB2	3997116	3988523	9031.ENSGALP00000037001	9031.ENSGALP00000008911	0	0	0	0	0.466	0	0	0	0.465
TLR3	TLR2-2	4000300	3997382	9031.ENSGALP00000043092	9031.ENSGALP00000038134	0	0	0	0.555	0.058	0	0	0.963	0.461
IL1R1	TLR5	3995213	3990915	9031.ENSGALP00000027049	9031.ENSGALP00000015286	0	0	0	0	0.057	0	0	0.434	0.444
TLR7	IL1R1	3996821	3995213	9031.ENSGALP00000035830	9031.ENSGALP00000027049	0	0	0	0	0	0	0	0.441	0.441
TLR2-2	IL1R1	3997382	3995213	9031.ENSGALP00000038134	9031.ENSGALP00000027049	0	0	0	0	0.058	0	0	0.43	0.44
TLR7	TLR15	3996821	3990158	9031.ENSGALP00000035830	9031.ENSGALP00000013260	0	0	0	0.584	0.232	0	0	0.666	0.44
TLR3	TLR4	4000300	3989441	9031.ENSGALP00000043092	9031.ENSGALP00000011319	0	0	0	0.591	0.078	0	0	0.925	0.425
FYN	LOC419429	3994087	3986300	9031.ENSGALP00000024180	9031.ENSGALP00000003116	0	0	0	0.556	0.059	0.242	0	0.49	0.41

## Sheet: string_protein_sequences
>ITGB3	9031.ENSGALP00000000518	Gallus gallus integrin, beta 3 (platelet glycoprotein IIIa, antigen CD61) (ITGB3), mRNA
MEELRVAFSILVLCAAGSWGSNICATRGVTSCKQCLAVSPLCAWCSAEVVAQSTPRCDLFANLLQNGCGRDFIEFPRSSITVLEERPLSDKGSGGSTTTQMSPQRIQLNLRPDDSQMFRVHVRQVEDYPVDIYYLMDLSNSMKDDLKNIQNLGTKLASEMRKLTSNLRIGFGAFVDKPISPYMYISPPEAIKNPCYEIGEKCLPMFGYKHVLTLTDEVMRFNEEVKKQSVSRNRDAPEGGFDAIIQATVCDEKIGWRNDASHLLVFTTDAKTHIALDGRLAGIVQPNDAQCHIDKDNFYSASTTLDYPSLGLMTEKLSQKNINLIFAVTDTVVGLYQNYSELIPGTTVGTLSRDSSNVLQLIVDAYGKIRSKVELEVRDLPEELSLSFNATCLNDEVIT…
>LOC419429	9031.ENSGALP00000003116	Gallus gallus protein tyrosine phosphatase, non-receptor type 11-like (LOC419429), mRNA; Belongs to the protein-tyrosine phosphatase family. Non-receptor class 2 subfamily
MVRWFHPNISGIEAEKLLLTRGVHGSFLARPSKSNPGDFTLSVRRNDEVTHIKIQNTGDYYDLYGGEKFATLAELVQYYTEQQGLLREKNSNVIELKYPLNCQDPTSERWYHGHLTGKEAEKLLTEKGKPGSFLVRESQSKPGDFVLSVLTNEDKMETGDRKPHVTHVMIHYQPDGKYDVGGGERFDTLTDLVEHYKKNPMVEKSGAVVHLKQPFNATRINAANIENRVRELNKMADHSEKAKQGFWEEFEMLQQQECKLLYPRKEGQRPENKAKNRYKNILPFDTTRVALRDVDESVPGSDYINANYIKSIPEDGRNSEHCKIYIATQGCLQTTVNDFWTMVYQENTHVIVMTTKEVERGRNKCFRYWPDKGCAKEYGCICVRNISEREAQGYYLREL…
>ITGAV	9031.ENSGALP00000004173	Integrin alpha-V; The alpha-V integrins are receptors for vitronectin, cytotactin, fibronectin, fibrinogen, laminin, matrix metalloproteinase-2, osteopontin, prothrombin, thrombospondin and vWF. They recognize the sequence R-G-D in a wide array of ligands. ITGAV:ITGB3 binds to fractalkine (CX3CL1) and may act as its coreceptor in CX3CR1-dependent fractalkine signaling. ITGAV:ITGB3 binds to NRG1 (…
MAALRASLLLSCALTAARAFNLDAERPAVYSGAEGSYFGFAVDFFAPDASSMFLLVGAPKANTSQSNVVEGGQVLQCNWNSNRNCQPIIFDSTGNRDFAPDDPLEFKSHQWFGASVRSKNDKILACAPLYHWRTETKQEREPVGTCYLFDGSKSVEYAPCRSTTIDADGQGFCQGGFSIDFTKGDRVLLGGPGSFYWQGQLISDRVAEILAKYDSKVYSTKYDDQLATRPASAAFDDSYLGYSVAVGDFSGDGIEDFVSGVPRAARTLGMVSIYNGKNMSSMYNFTGEQMAAYFGYSVATTDINGDDYTDLFIGAPLFMDRGSDGKLQEVGQVSICLQRASGGFQIAKLNGFEIFARFGSAIAPLGDLDQDGFNDIAVAAPYGGEDKRGLVYIYNGRAT…
>ENSGALG00000002696	9031.ENSGALP00000004243	Uncharacterized protein; Belongs to the universal ribosomal protein uL22 family
KMVRYSLDPENPTKSCKSRGSNLRVHFKNTRETAQAIKGMHIRKATKYLKDVTLKKQCVPFRRYNGGVGRCAQAKQWGWTQGRWPKKSAEFLLHMLKNAESNAELKGLDVDSLVIEHIQVNKAPKMRRRTYRAHGRINPYMSSPCHIEMILTEKEQIVPKPEEEVAQKKKISQKKLKKQKLMARE
>NCOR2	9031.ENSGALP00000004924	Nuclear receptor corepressor 2
MSGSTQPVTQNWRATEPRYPPHAMSYPVQIARPHADVALLEYQHHSRDYASHLPPGSIMQPQRRRPSLLSEFQPGNERSQELHLRTEAHSYLSDLTKPSDLEFIETKRPRLDLLQDPLLRHSPLLSQGQQAGSEELPKDRGLPGKLEPVSPVSPAHPEAELDLLPARLSKEELIQNMDRVDREITMVEQQISKLKKKQQQLEEEAAKPPEPEKPISPPPIESKHRSLVQIIYDENRKKAEAAHRILEGLGPQVELPLYNQPSDTRQYHENIKINQAMRKKLILYFKRRNHARKQWEQKFCQRYDQLMEAWEKKVERIENNPRRRAKESKVREYYEKQFPEIRKQRELQERMQSRVGQRGSGGLSMSAARSEHEVSEIIDGLSEQENLEKQMRQLAVIPP…
>BLB2	9031.ENSGALP00000008911	MHC class II beta chain 1
MGSGRVPAAGAVLVALLALGARPAAGTRPSAFFQWTFKAECHYLNGTERVRYLVRYVYNRQEYAHFDSDVGKHVADTPLGEPQAEYWNSNAEILENRMNEVDTYCRHNYGVVESFTVQRSVEPKVRVSALQSGSLPETDRLACYVTGFYPPEIEVKWFLNGREETERVVSTDVMQNGDWTYQVLVVLETVPRRGDSYVCRVEHASLRQPISQAWEPPADAGRSK
>TLR4	9031.ENSGALP00000011319	Gallus gallus toll-like receptor 4 (TLR4), mRNA
MPSRAAPTALTLGVLLQLLLVLSLLAGCIPSPCLEVIPSTAFRCTGQNISGVPAEIPNTTLDLDLSFNSLKLLSSNYFSSVPKLQFLDLSRCHIHTIEDNSFVDLYNLSTLILTANSLQHLGLAAFHGLTSLKKLVLVETSISSLSDLPIGHLNTLQELNLGHNNIASLKLPKYFANLTSLRHLSFSSNNITYISKGDLDALRETNRLNLTLVLSLNNIKYIQSGSFAKIHLGELILRSSFENLNAMHSSLQGLAGLQVNRLIVGEFTNILKITAFQNGLLSGLCQVQMQEFVLMCFREFDNDTDTLFDCIGNVTTIRLVDLNLETLSEVPMFSQVKHLEWKKCKFQELPAEKLSLFKELRVLRITKSKDLNGFEQKFGSLTHLEVVDLSENRLSFLTC…
>ITGB2	9031.ENSGALP00000012130	Gallus gallus integrin, beta 2 (complement component 3 receptor 3 and 4 subunit) (ITGB2), mRNA
MPRDCCLWLPAMTWVLLLLTTAFAAECPKIKVGTCKNCIQSGPGCAWCKKLSFTKAGEPDSNRCDTIEQLQQRGCPENEIEFPVNEIKRTQDSAFSNKIQLTPQEVHLKLRIREPAEFDVKFRRATGYPIDIYYLMDLSYSMLDDLENVKKLGGQLLRALESTTPSRRIGFGSFVDKTVLPFVNTHPEKLKNPCPNKDSNCQPPFAFKHILSLTDNAEKFESEVGKQFISGNLDAPEGGLDAMMQAAVCGDLIGWRNVTRLLVYATDDGFHFAGDGKLGGILTPNDGQCHLEDNMYKKSNEFDYPSVGQLVQKLAENNIQPIFAVTSKMVDVYKKLSDMIPKSAVGELNEDSSNIIELIQVAYNNLSSRIILDHSTLPDVLDVKYDSICNNNTGAKNEA…
>TRAF6	9031.ENSGALP00000012873	TNF receptor-associated factor 6, E3 ubiquitin protein ligase
MSLLHSDSSCGGRDLDSGCCTAMASACSGGAKEDSVSVGSGTGNPPSSFTEETQGYDVEFDPPLESKYECPICLMALREAVQTPCGHRFCKGCIVKSIRDAGHKCPVDNEILLENQLFPDNFAKREILSLTVKCPNKGCCLKMELRHLEEHQLHCDFTTVECPQCQGAFQKNHLKEHMTQECPRRQVCCPNCATSMAYEDKELHDQTCPLANVFCEYCNTMLIRQQMPNHYDNDCPTAPVPCFYSAFGCPEKMQRNELARHMQEFTQVHMRMMAQSIQNISVTATNPVPFINGLPFEPALFSHVSRAPYNCNPEVENFKETIQQLEGRLVRQDHQIRELIAKMETQNTHMAELKRTIRDLEGKITEMEAQQCNGIYIWKIENFSGLQKAQEEERPVVMH…
>TLR15	9031.ENSGALP00000013260	Uncharacterized protein; Gallus gallus toll-like receptor 15 (TLR15), mRNA
MVPIGRKVSCCKKENPATHPHSPSCPAASTTKAAAWPGSFRGCSRAARRVGTGNRRMRILIGSLYFYFISFLFSKVNGFLTQRTSPVSSFPFYNYSYLNLSSVSQAQAPKTARALNFSYNAIEKITKRDFEGFHVLEVLDLSHNHIKDIEPGAFENLLSLVSVDLSFNDKNLLVSGLAPHLKLIPTSGASGPSQIYMYFQKSAEAALEPSAPAELLPHLEDPPNPGNVNPRFRQRRTEENKTSPPAATLRPDLCGAPINGLLDLSRTKLSNEELTAKLDADLCQAQLGTVLEFNISHSDLEMDLLSLFILFLPMKDIQSVDASYNRITINNIDVEAICHFPFSNFSFLNISNNPINSLETVCLPESITVIDLSFTNISTIPANFAKKLSKLERMYVQGN…
>TLR5	9031.ENSGALP00000015286	Gallus gallus toll-like receptor 5 (TLR5), mRNA
MMLHQRLIIVFGIALAGDICASRSCYSEDQVSMYNSCNLTGVPPVPKDTAKLFLTYNYIRQVTATSFPLLEDLFLLEIGTQRVFPLYIGKEAFRNLPNLRVLDLGFNNILLLDLDSFAGLQRLTILRLFQNNLGDSILEERYFQDLRSLEELDLSGNQITKLHPHPLFYNLTILKAVNLKFNKISNLCESNLTSFQGKHFSFFSLSTNTLYRTDKMIWAKCPNPFRNITFNSLDVSENGWSTETVQYFCTAIKGTQINYLSFRSHTMGSGFGFNNLKNPDTDTFTGLARSDLHLLDISNGFIFSLNSLIFESLRNLEFLNLFRNKINQIQKQAFFGLENLEILNLSSNLLGELYDYTFEGLHSIMYIDLQQNHIGMIGEKSFSNLVNLKIIDLRDNAIK…
>MAML3	9031.ENSGALP00000015937	Mastermind-like 3 (Drosophila)
MRDFRAGRQQLQETVKRKLEGARSPLNGEQQNGVCDGSFSPTSKRIRKDVPGIEAINSLPNNLPLPAVSPLHQLDMKASLPLQNSGTHGSGLEDLGKNGGLSEIKLPVNGCNELDDGFNVLQNKELKQEPLDDPTCIDTSETSLSNQNKLFSDINLNDQEWQELIDELANTVPEDDIQDLFNEDFEEKKEPDLTRPATETQESASVKSDPSHSPFAHVPLGSPQVRPSSSGPPFSNVSTASSVTSVSSAPPAPIPVGSPANCVVQSPQTPSQAHTPGQTQTRSGNGYLMNPAAATVAGSGPGPVNIPSADLSPAEQLKQMAAQQQQRAKLMQQKQQQHPNQASSWSPVGPPSSPYGGPFSAEKPNSPMMYPQAFNNQNPIVPPMANNPQKTTMNNYLPQ…
>RAP1B	9031.ENSGALP00000016120	Ras-related protein Rap-1b; Probable GTP-binding protein that possesses GTPase activity. May play a role in endothelial cell polarity and endothelial barrier function (By similarity)
MREYKLVVLGSGGVGKSALTVQFVQGIFVEKYDPTIEDSYRKQVEVDAQQCMLEILDTAGTEQFTAMRDLYMKNGQGFALVYSITAQSTFNDLQDLREQILRVKDTDDVPMILVGNKCDLEDERVVGKEQGQNLARQWNNCAFLESSAKSKINVNEIFYDLVRQINRKTPVPGKARKKSSCQLL
>PTCH1	9031.ENSGALP00000020572	Protein patched homolog 1; Acts as a receptor for sonic hedgehog (SHH), indian hedgehog (IHH) and desert hedgehog (DHH). Associates with the smoothened protein (SMO) to transduce the hedgehog's proteins signal; Belongs to the patched family
MASAADALEPESGSSTAGGGSHPVRAARSARGRRRRSGGTRRAAAPDREYLQRPSYCDAAFALEQIAKGRATGRRAPLWLRAKFQRLLFNLGCYIQKNCGKFLVVGLLIFGAFAVGLRAANLETNVEELWVEVGGRVSRELNYTRQKIGEEAMFNPQLMIQTPQEDGTNVLTTEALRQHLDSALQASRVHVYMYNRQWKLEHLCYKSGELITEAGYMDQIIEYLYPCLIITPLDCFWEGAKLQSGTAYLLGKPPLQWINFDPLEFLEELKKINYQVESWEEMLNKAEVGHGYMDRPCLNPADPDCPITAPNKNSTKPLDVALVLSGGCYGLSRKYMHWQEELIIGGTVKNSSGKLVSAQALQTMFQLMTPKQMYEHFKGYEYVSHINWNEDKAAAILEA…
>ITGA2	9031.ENSGALP00000023991	Integrin, alpha 2 (CD49B, alpha 2 subunit of VLA-2 receptor)
MASASAALLLALGFLHNCCEAYNVGLLKAKIFSGPSREQFGYAVQQFINEQGKWLLVGSPWSGYPVNRTGDIYACPVGTPKTTCKKLNLQALINIPNVTEIKEDMNLGLTLIQNSKTGGFLTCGPLWAQQCGSQHYATGVCSEISPSFQILRSFSPAVQKCSSVIDIVVVCDESNSIYPWDAVRAFLKKFVQGLDIGINKTQVGLIQYANNPRVVFKLNEYRTKDDVVNATEKTFQQGGDLTNTFKAIDYARQHAFSAESGGRPTATKVMVVVTDGESHDGSNLKTVIGRCNEDNITRFGIAVLGYLIRNELDTKNLIKEIKGIASHPTEKYFFNVSSEAALLEEAGTLGERIFSIEGTDQGDTFQMEMSQVGFSAYFSEKKDVLLLGAVGAYDWSGTV…
>IQGAP2	9031.ENSGALP00000024116	Gallus gallus IQ motif containing GTPase activating protein 2 (IQGAP2), mRNA
MHHEELAPLQRPRYGSIVDDERLSAEEMDERRRQNIAYEYLCHLEEAKRWMEVCLEEELPPTTELEEGLRNGVYLAKLAKFFAPNLVSDKKIYDVKQERYKRSGLHFRHTDNTVQWLRAMESIGLPKIFYPETTDVYDRKNIPRMIYCIHALSLYLFKLGLAPQIQDLLGKVDFTEEEISNMSKELEKYGIQMPSFSKIGGILASELSVDEAALHAAVIAINEAIEKGIAEQTIATLRNPNAMLLNVDEELAQDYQNELFDAKRRKQSSARLKNGTISDEERDVYEELLTQAEIQGNINKINKLIAVDNINTAIRNCDPSKTLVALMKPEAQLPVVHSFAAAIYQTELFNLQQQNAVNYLAHDELSVAVEMLSAVVLLNQALENKDIQMIRNHLRNPCI…
>FYN	9031.ENSGALP00000024180	Tyrosine-protein kinase Fyn; Tyrosine-protein kinase implicated in the control of cell growth. Plays a role in the regulation of intracellular calcium levels. Required in brain development and mature brain function with important roles in the regulation of axon growth, axon guidance, and neurite extension. Role in CNTN1-mediated signaling
MGCVQCKDKEATKLTDERDGSLTQSSGYRYGTDPTPQHYPSFGVTSIPNYNNFHATGGQGLTVFGGVNSSSHTGTLRTRGGTGVTLFVALYDYEARTEDDLSFHKGEKFQILNSSEGDWWEARSLTTGETGYIPSNYVAPVDSIQAEEWYFGKLGRKDAERQLLSFGNPRGTFLIRESETTKGAYSLSIRDWDDMKGDHVKHYKIRKLDNGGYYITTRAQFETLQQLVQHYSEKADGLCFNLTVIATNNTPQTVGLAKDAWEVARDSLFLEQKLGQGCFAEVWRGTWNGNTKVAIKTLKPGTMSPESFLEEAQIMKKLKHDKLVQLYAVVSEEPIYIVTEYMSKGSLLDFLKDGEGRALKLPNLVDMAAQVAAGMAYIERMNYIHRDLRSANILVGNGL…
>IL1R1	9031.ENSGALP00000027049	Uncharacterized protein; Gallus gallus interleukin 1 receptor, type I (IL1R1), mRNA
MHKMTSTFLLIGHLILLIPLFSAEECVICNYFVLVGEPTAISCPVITLPMLHSDYNLTWYRNGSNMPITTERRARIHQRKGLLWFIPAALEDSGLYECEVRSLNRSKQKIINLKVFKNDNGLCFNGEMKYDQIVKSANAGKIICPDLENFKDEDNINPEIHWYKECKSGFLEDKRLVLAEGENAILILNVTIQDKGNYTCRMVYTYMGKQYNVSRTMNLEVKESPLKMRPEFIYPNNNTIEVELGSHVVMECNVSSGVYGLLPYWQVNDEDVDSFDSTYREQFYEEGMPHGIAVSGTKFNISEVKLKDYAYKFFCHFIYDSQEFTSYIKLEHPVQNIRGYLIGGGISLIFLLFLILIIYKIFKIDIVLWYRSSCHPLLGKKVSDGKIYDAYVLYPKNRE…
>TLR7	9031.ENSGALP00000035830	Gallus gallus toll-like receptor 7 (TLR7), mRNA
MSSVWVHHARTSNALLFVLLFLFPMLLSGRWFPKTLPCDVEAFESTVRVDCSDRRLKEVPRGIPGNATNLTLTINHIPRISPASFTQLENLVEIDFRCNCVPPRLGPKDNVCVTPPSIENGSFAALTRLKSLYLDANQLSKIPRGLPATLRLLSLEANNIFSIKKNTFSELRNIELLYLGQNCYYRNPCNVSFEIEETAFLNLKNLTVLSLKSNNLTFIPPNLSSTLKELYIYNNRIQEVQEHDLSNLYNLEILDLSGNCPRCYNAPYPCTPCPNISIKIHSKAFYSLKKLRILRLHSNSLQSIPSSWFKNIKNLKNLDLSQNFLIKEIGDAEFLKLIPSLVELDLSFNFELQMYSPFLNLSKTFSCLSNLETLRIKGYVFKELREENLDPLLNLRNLT…
>IL7	9031.ENSGALP00000035870	Uncharacterized protein; Gallus gallus interleukin 7 (IL7), mRNA
NPAFFRSIFRVLPLLLVLSPVNSSSCTMGNKTTEIRVKYENILSHDIEELVNMSAEYRDRCCKNKRHEHNKVFFCNDTQEIGSLQSMACNMLRFFNKQKINKEFRRKAALVSCGTLQVLQCKCERHKKEKSINASCSQISGKEQQ
>F13A1	9031.ENSGALP00000036433	Gallus gallus coagulation factor XIII, A1 polypeptide (F13A1), mRNA
MSEPTSTDREKKRPPLNGRRALPSNNSNAEENDVPEMDAFGLIPRGFNPKDYLRVVDIHMFKEPNEINKQQHHTDKYYNPKLIVRRGQPFQIQIDFSRPYDPEKDQIWLEYLIGRYPQPNKGTYIPILIGDVLKPGEWGAKITHRENNSIRLSIMSSATCIIGKFRLYIAIWTPYGIIRTHRNSATDTYILFNPWCQLDAVYLDDEKEREEYVLNDVGIVFHGDVNEVKLRSWSYGQFEENILDACLFLMDKAELELSGRGNPIKICRVASAMINSKDDNGVLAGSWDNLYDYGVPPSAWTGSVDILLEYYSSKQPVRYGQCWVFAGVFNTFLRCLGIPARLITNYSSAHDNNANLQLDFFLDDEGQVDNRLTKDSVWNYHCWNEAWMTRPDLPVGFGG…
>RAC2	9031.ENSGALP00000037001	Gallus gallus ras-related C3 botulinum toxin substrate 2 (rho family, small GTP binding protein Rac2) (RAC2), mRNA; Belongs to the small GTPase superfamily. Rho family
MQAIKCVVVGDGAVGKTCLLISYTTNAFPGEYIPTVFDNYSANVMVDSKPVNLGLWDTAGQEDYDRLRPLSYPQTDVFLICFSLVSPASYENVRAKWFPEVRHHCPSTPIILVGTKLDLRDDKDTIEKLKEKKLSPITYPQGLALAKEIDSVKYLECSALTQRGLKTVFDEAIRAVLCPQPTRTKKRACSLL
>TLR2-2	9031.ENSGALP00000038134	Toll-like receptor 2 type-2; Participates in the innate immune response to microbial agents. Acts via MYD88 and TRAF6, leading to NF-kappa-B activation, cytokine secretion and the inflammatory response. Mediates the response to mycoplasmal macrophage-activating lipopeptide-2kD (MALP-2)
MHTWKMWAICTALAAYLPEEQALRQACLSCDATQSCNCSFMGLDFIPPGLTGKITVLNLAHNRIKVIRTHDLQKAVNLRTLLLQSNQISSIDEDSFGSQGKLELLDLSNNSLAHLSPVWFGPLFSLQHLRIQGNSYSDLGESSPFSSLRNLSSLHLGNPQFSIIRQGNFEGIVFLNTLRIDGDNLSQYEPGSLKSIRKINHMIISIRRIDVFSAVIRDLLHSAIWLDVRKLAFSVPEKIQLLRIMSSSFAKKISLKQCLFTDATVPEIVSILEGMPKLMEVEMKDCTLLGTGKWYKQIHANQSQSLRILTIENLSIEEFYLFTDLQSVLDLLSLFRKVTVENTKVFLVPCKLSQHLLSLEYLDLSANLLGDQSLEHSACQGAWPSLQTLNLSQNSLSDL…
>GIT1	9031.ENSGALP00000038832	GIT ArfGAP 1; Gallus gallus G protein-coupled receptor kinase interactor 1 (GIT1), mRNA
PTKSEFIRAKYQMLAFVHKLPCRDDDGVTAKDLSKQLHSSVRTGNLETCLRLLSLGAQANFFHPEKGTTPLHVAAKAGQILQAELLVVYGADPGAPDVNGRTPIDYARQAAQHELAERLVECQYELTDRLAFYLCGRKPDHKNGHYIIPQMADSLDLSELAKAAKKKLQALSNRLFEELAMDVYDEVDRRENDAVWLTTQNHSTLVTERSAVPFLPVNPEYSATRNQGRQKLARFNAREFATLLIDILGEAKRRQQGKSPLSPTDALDYSLRSQSDLDDQHDYDSVASDEDTDQELLRNASRNNRARSMDSSDLSDGPITLQEYLEVKKALAASEAKVQQLMKVNNSLSDELRRLQREIHKLQSENTQIRQQAVPPHPTPAPSERPEHGHPPGTAPLHR…
>TBXA2R	9031.ENSGALP00000040720	Thromboxane A2 receptor
MGGGDAGPPNMSEPQTCFGVVNLSLSLNVTQHKAIASPWFSTAFGLIGLCSNLFALYVLLSSSRQLSSRSRSSFLVFLCGLVVTDFMGLLVTAAVIIPYHFTKFSWPQVDPGCHLCNFLGFSMVFFGQCPLLLGATMAGERFVGINRPFSRSTSVSKRRAWAVVATVWGFSCALGLLPVLGLGRYTLQYPGSWCFLTLLPDAGNVVFCLLFALLGVCSVLLSFVFNTVSVVTLCRVYHDRESVQRRRDSEVEMMVQLVGIMVIATICWMPLLIFIIQTTLQQLRTGDPLPMLPGQTQQLLLIYIRMVTWNQILDPWVYILFRRAVLQRLHPGLRARPSLLSLYPGPPLRSRICAP
>VAV1	9031.ENSGALP00000041692	Vav 1 guanine nucleotide exchange factor
MGWRWDGSVGVPHCGGWWRGTAELGPAELWGGSSGDDQEMGGGGGGTQLWGRPEGDPILTPNPTGAVRSFGSAKARYDFCARDRTELTLREGDIIRVLSKKGHPGWWKGEIYGRVGWFPANYVEEDYSEYC
>MYD88	9031.ENSGALP00000042597	Myeloid differentiation primary response protein MyD88; Adapter protein involved in the Toll-like receptor and IL-1 receptor signaling pathway in the innate immune response
MATVPVGAGSAPGPEPADLHSVPMVALNYGVRRRLGLYLNPRAATAADWTALAEKLGHDYLEIRRLEALPDPTAALLEEWQSRCPGGATVGQLLELLRQLGRHDVLLELGGSVEEDCKKYLRRKQQEAEQPLQVPAVDSSVPKTSELMGITTRDDPYGHGTEMFDAFICYCQKDLQFVQEMIRELEQTEFKLKLCVFDRDVLPGTCVWSISGELIERRCRRMVVVISDDYLESDECDFQTKFALSLSPGARLKRLIPVKCKTMKNEFPSILRFITICDYTNPCTKKWFWTRLAKSLLLP
>TLR3	9031.ENSGALP00000043092	Gallus gallus toll-like receptor 3 (TLR3), mRNA
MGCSIPCWNSLSFRLVFVCLLCASVGKQCQIRNTMADCSHLKLTQIPSDLPKNITGLDISHNQLKKLDPENLTEYSNLIYLNAGYNIISKLKPGLCKNLPLLQILKLEHNQLHELPDGVFASCSNLTELNLGYNIIEVKNDPFKTLENLNILDLSHNHLKSANLGLQQQLKNLRELVLYSNQITELNKEDLKFLSNTSLNSLDLSSNPLKEFHTGCLHAIGNLFGLILNNVELGENRTKKLCTELSDTAIQNLSLSHVKLSHINRLTLQGLQGTNLTVLNLSKNSLSVIEDDSFQWLSKLEYLNLEDNNIINVSSHLFYGLSSITHLNLINSLTGKIEDFSFQWLHHLEYLIMDNNNFPRITTNMFTGLKNLKYLSLYNCNTNLQRITNKTFVSLANSR…

## Sheet: string_protein_annotations
#node	identifier	domain_summary_url	annotation	other_names_and_aliases
ITGB3	9031.ENSGALP00000000518	https://smart.embl.de/smart/DDvec.cgi?smart=781:SIGNAL(1|20)+INB(31|453)+Pfam_EGF_2(546|576)+Pfam_EGF_2(585|616)+Integrin_B_tail(626|710)+TRANS(711|733)+Integrin_b_cyt(734|780)+	Gallus gallus integrin, beta 3 (platelet glycoprotein IIIa, antigen CD61) (ITGB3), mRNA	374209	374209	CAA51069.1	CAA53095.1	ENSGALG00000000379	ENSGALG00000000379	ENSGALG00000000379	ENSGALP00000000518	ENSGALP00000000518	ENSGALP00000000518	ENSGALP00000030853	ENSGALP00000030854	ENSGALP00000030855	ENSGALP00000030856	ENSGALP00000039791	ENSGALT00000000519	ENSGALT00000000519	ENSGALT00000000519	ENSGALT00000031489	ENSGALT00000031490	ENSGALT00000031491	ENSGALT00000031492	ENSGALT00000040589	F1NS08	F1NS08	F1NS08	Gga.1039	ITGB3	ITGB3	ITGB3	ITGB3	ITGB3	ITGB3	ITGB3-201	Integrin beta	Integrin beta	NM_204315	NM_204315.1	NP_989646	NP_989646	NP_989646.1	NP_989646.1	NP_989646.1	Q788Q4	Q90829	Q90829
LOC419429	9031.ENSGALP00000003116	https://smart.embl.de/smart/DDvec.cgi?smart=592:SH2(2|85)+SH2(108|202)+PTPc(245|521)+	Gallus gallus protein tyrosine phosphatase, non-receptor type 11-like (LOC419429), mRNA; Belongs to the protein-tyrosine phosphatase family. Non-receptor class 2 subfamily	3.1.3.48	419429	A0A1L1RU24	A0A1L1RU24_CHICK	E1BTC5	EC 3.1.3.48	ENSGALG00000002005	ENSGALG00000002005	ENSGALG00000002005	ENSGALP00000003116	ENSGALP00000003116	ENSGALP00000003116	ENSGALP00000039393	ENSGALP00000039393	ENSGALP00000039396	ENSGALT00000003121	ENSGALT00000003121	ENSGALT00000003121	ENSGALT00000040194	ENSGALT00000040194	ENSGALT00000040197	F1NWP7	Gga.25396	LOC419429	LOC419429	LOC419429	NM_001030875	NM_001030875.3	NP_001026046	NP_001026046	NP_001026046.2	NP_001026046.2	Tyrosine-protein phosphatase non-receptor type	UPI0000449728	UPI0000ECA2CE	gga:419429
ITGAV	9031.ENSGALP00000004173	https://smart.embl.de/smart/DDvec.cgi?smart=1034:SIGNAL(1|19)+Int_alpha(34|92)+Int_alpha(236|286)+Int_alpha(290|351)+Int_alpha(354|410)+Int_alpha(418|477)+TRANS(980|1002)+Pfam_Integrin_alpha(1003|1017)+	Integrin alpha-V; The alpha-V integrins are receptors for vitronectin, cytotactin, fibronectin, fibrinogen, laminin, matrix metalloproteinase-2, osteopontin, prothrombin, thrombospondin and vWF. They recognize the sequence R-G-D in a wide array of ligands. ITGAV:ITGB3 binds to fractalkine (CX3CL1) and may act as its coreceptor in CX3CR1-dependent fractalkine signaling. ITGAV:ITGB3 binds to NRG1 (…	396420	ENSGALG00000002655	ENSGALG00000002655	ENSGALG00000002655	ENSGALP00000004173	ENSGALP00000004173	ENSGALP00000004173	ENSGALP00000039365	ENSGALT00000004182	ENSGALT00000004182	ENSGALT00000004182	ENSGALT00000040167	F1NGX1	Gallus gallus integrin, alpha V (ITGAV), mRNA.	Gallus gallus integrin, alpha V (ITGAV), mRNA.	Gga.815	ITAV_CHICK	ITGAV	ITGAV	ITGAV	ITGAV	ITGAV-201	Integrin alpha-V	NM_205439	NM_205439.1	NP_990770	NP_990770	NP_990770.1	NP_990770.1	P26008	UPI00003AE4C5	Vitronectin receptor subunit alpha	gga:396420	integrin subunit alpha V
ENSGALG00000002696	9031.ENSGALP00000004243	https://smart.embl.de/smart/DDvec.cgi?smart=185:Pfam_Ribosomal_L22(18|152)+	Uncharacterized protein; Belongs to the universal ribosomal protein uL22 family	A0A1L1RSL5	A0A1L1RSL5_CHICK	AC202795	ENSGALG00000002696	ENSGALG00000002696	ENSGALG00000002696	ENSGALP00000004243	ENSGALP00000004243	ENSGALP00000004243	ENSGALP00000038880	ENSGALT00000004252	ENSGALT00000004252	ENSGALT00000004252	ENSGALT00000039671	F1NG53	LOC770025	UPI00003AF042	Uncharacterized protein	Uncharacterized protein	Uncharacterized protein	XM_424454	XM_424454.4	XP_424454	XP_424454.1
NCOR2	9031.ENSGALP00000004924	https://smart.embl.de/smart/DDvec.cgi?smart=2496:Pfam_GPS2_interact(142|230)+SANT(430|478)+COIL(509|549)+SANT(607|655)+	Nuclear receptor corepressor 2	AADN03007059	AADN03007133	AADN03007179	CTG26	E1C3T2	E1C3T2	E1C3T2	E1C3T2_CHICK	E1C3T2_CHICK	ENSGALG00000003120	ENSGALG00000003120	ENSGALG00000003120	ENSGALP00000004924	ENSGALP00000004924	ENSGALP00000004924	ENSGALT00000004933	ENSGALT00000004933	ENSGALT00000004933	NCOR2	NCOR2	NCOR2-201	Nuclear receptor corepressor 2	Nuclear receptor corepressor 2	Nuclear receptor corepressor 2	SMRT	SMRTE	TNRC14	TRAC-1	UPI0002C8782B	XP_015131106	gga:416815	nuclear receptor corepressor 2	nuclear receptor corepressor 2
BLB2	9031.ENSGALP00000008911	https://smart.embl.de/smart/DDvec.cgi?smart=224:SIGNAL(1|26)+MHC_II_beta(39|113)+IGc1(138|209)+	MHC class II beta chain 1	693256	693256	A5HUL2	A5HUL2	A5HUL2	A5HUL2_CHICK	A5HUL2_CHICK	AADN03007225	AAQ10934.1	AAV80469.1	AB181880	ADX68955.1	AF539401	AJ248586	AY828507	B-LB	B-LB	B-LB	B-LB2	B-LB21	B-LB21	BAD23841.1	BAF62996.1	BAG69445.1	BLB1	BLB1	BLB1	BLB1	BLB1	BLB1-201	BLB2	BLB2	BLB2	CAB58150.1	ENSGALG00000000141	ENSGALG00000000141	ENSGALG00000000141	ENSGALP00000000193	ENSGALP00000000196	ENSGALP00000000202	ENSGALP00000008911	ENSGALP00000008911	ENSGALT00000000194	ENSGALT00000000197	ENSGALT00000000203	ENSGALT00000008925
TLR4	9031.ENSGALP00000011319	https://smart.embl.de/smart/DDvec.cgi?smart=843:SIGNAL(1|30)+LRR(81|104)+LRR(105|128)+LRR(153|177)+LRR(178|201)+LRR(381|402)+LRR(504|527)+LRR(528|551)+LRR(552|575)+LRRCT(588|638)+TRANS(640|662)+TIR(687|832)+	Gallus gallus toll-like receptor 4 (TLR4), mRNA	ACR19210.1	ACR26283.1	ACR26289.1	ACR26322.1	AFF57532.1	C4PAV4	C4PCF3	C4PCF3	C4PCF3	C4PCF3_CHICK	C4PCF3_CHICK	ENSGALG00000007001	ENSGALG00000007001	ENSGALG00000007001	ENSGALP00000011319	ENSGALP00000011319	ENSGALP00000011319	ENSGALP00000033864	ENSGALP00000033865	ENSGALP00000033866	ENSGALT00000011333	ENSGALT00000011333	ENSGALT00000011333	ENSGALT00000034507	ENSGALT00000034508	ENSGALT00000034509	FJ908711	FJ915487	FJ915493	FJ915527	Gallus gallus toll-like receptor 4 (TLR4), mRNA.	Gallus gallus toll-like receptor 4 (TLR4), mRNA.	Gga.32116	H9NDQ1	JQ280467	NM_001030693	NM_001030693.1	NP_001025864	NP_001025864	NP_001025864.1	TLR4	TLR4	TLR4	TLR4	TLR4	TLR4
ITGB2	9031.ENSGALP00000012130	https://smart.embl.de/smart/DDvec.cgi?smart=773:SIGNAL(1|24)+INB(34|450)+Integrin_B_tail(624|703)+TRANS(704|726)+Integrin_b_cyt(727|773)+	Gallus gallus integrin, beta 2 (complement component 3 receptor 3 and 4 subunit) (ITGB2), mRNA	CD18	CD18	ENSGALG00000007511	ENSGALG00000007511	ENSGALG00000007511	ENSGALP00000012130	ENSGALP00000012130	ENSGALP00000012130	ENSGALP00000032981	ENSGALP00000032983	ENSGALT00000012144	ENSGALT00000012144	ENSGALT00000012144	ENSGALT00000033622	ENSGALT00000033624	F1NM67	F1NM67	F1NM67	F1NM67_CHICK	F1NM67_CHICK	Gga.4507	ITGB2	ITGB2	ITGB2	ITGB2	ITGB2	ITGB2-201	Integrin beta	Integrin beta	NM_205251	NM_205251.1	NP_990582	NP_990582	NP_990582.1	UPI00003AE559	gga:396181	integrin subunit beta 2
TRAF6	9031.ENSGALP00000012873	https://smart.embl.de/smart/DDvec.cgi?smart=545:RING(70|108)+Pfam_zf-TRAF(204|261)+COIL(314|371)+MATH(378|505)+	TNF receptor-associated factor 6, E3 ubiquitin protein ligase	2.3.2.27	423163	423163	E1C626	E1C626	E1C626	E1C626_CHICK	E1C626_CHICK	EC 2.3.2.27	ENSGALG00000007932	ENSGALG00000007932	ENSGALG00000007932	ENSGALP00000012873	ENSGALP00000012873	ENSGALP00000012873	ENSGALT00000012888	ENSGALT00000012888	ENSGALT00000012888	RNF85	TNF receptor associated factor 6	TNF receptor associated factor 6	TNF receptor associated factor 6	TRAF6	TRAF6	TRAF6	TRAF6	TRAF6	TRAF6	TRAF6-201	UPI0002C87B6C	XP_004941602	XP_004941602	XP_004941602.1	XP_004941602.1	XP_004941602.1	XP_004941603	XP_004941603.1	XP_004941603.1	XP_004941603.1	XP_004941604	XP_004941604.1	XP_004941604.1	XP_004941604.1	XP_004941605	XP_004941605.1	XP_004941605.1
TLR15	9031.ENSGALP00000013260	https://smart.embl.de/smart/DDvec.cgi?smart=924:TRANS(59|81)+LRR_TYP(133|156)+LRR(465|490)+LRR(508|531)+LRR(552|573)+LRR(574|597)+LRR(598|621)+LRR(622|643)+LRRCT(657|708)+TRANS(710|732)+TIR(762|905)+	Uncharacterized protein; Gallus gallus toll-like receptor 15 (TLR15), mRNA	ACR26549.1	ACR26553.1	ACR26555.1	ACR26556.1	ACR26559.1	ACR26561.1	ACR26563.1	ACR26579.1	ACR26580.1	ACR26581.1	AEL16759.1	C4PBN9	ENSGALG00000008166	ENSGALG00000008166	ENSGALG00000008166	ENSGALP00000013260	ENSGALP00000013260	ENSGALP00000013260	ENSGALT00000013275	ENSGALT00000013275	ENSGALT00000013275	F6U7W1	F6U7W1	F6U7W1	F6U7W1_CHICK	F6U7W1_CHICK	FJ915223	FJ915227	FJ915229	FJ915230	FJ915233	FJ915235	FJ915237	FJ915253	FJ915254	FJ915255	Gga.26502	Gga.56392	JN112018	NM_001037835	NM_001037835.1	NP_001032924	NP_001032924	NP_001032924.1	TLR15	TLR15
TLR5	9031.ENSGALP00000015286	https://smart.embl.de/smart/DDvec.cgi?smart=861:SIGNAL(1|21)+LRR(96|119)+LRR(120|145)+LRR(146|170)+LRR(313|336)+LRR(337|360)+LRR(361|384)+LRR(385|406)+LRR_TYP(503|526)+LRR(527|550)+LRRCT(581|632)+TRANS(646|668)+TIR(694|841)+	Gallus gallus toll-like receptor 5 (TLR5), mRNA	554217	554217	ACR26258.1	ACR26259.1	ACR26260.1	ACR26262.1	ACR26266.1	ACR26272.1	ACR26274.1	ACR26275.1	C4PCK0	C4PCK0	C4PCK0	C4PCK0_CHICK	C4PCK0_CHICK	ENSGALG00000009392	ENSGALG00000009392	ENSGALG00000009392	ENSGALP00000015286	ENSGALP00000015286	ENSGALP00000015286	ENSGALT00000015302	ENSGALT00000015302	ENSGALT00000015302	FJ915535	FJ915536	FJ915537	FJ915539	FJ915543	FJ915549	FJ915551	FJ915552	Gallus gallus toll-like receptor 5 (TLR5), mRNA.	Gallus gallus toll-like receptor 5 (TLR5), mRNA.	Gga.3252	NM_001024586	NM_001024586.1	NP_001019757	NP_001019757	NP_001019757.1	TLR5	TLR5	TLR5	TLR5	TLR5	TLR5
MAML3	9031.ENSGALP00000015937	https://smart.embl.de/smart/DDvec.cgi?smart=959:COIL(556|585)+	Mastermind-like 3 (Drosophila)	422445	422445	AADN03003974	CAGH3	ENSGALG00000009809	ENSGALG00000009809	ENSGALG00000009809	ENSGALP00000015937	ENSGALP00000015937	ENSGALP00000015937	ENSGALT00000015954	ENSGALT00000015954	ENSGALT00000015954	F1P544	F1P544	F1P544	F1P544_CHICK	F1P544_CHICK	GDN	Gga.11072	KIAA1816	MAM2	MAML3	MAML3	MAML3	MAML3	MAML3	MAML3	MAML3-201	Mastermind like transcriptional coactivator 3	Mastermind like transcriptional coactivator 3	Mastermind-like 3 (Drosophila)	TNRC3	UPI0002C867F7	XP_015132176	XP_015132176.1	XP_015132176.1	XP_015132177.1	XP_015132177.1	XP_420411	XP_420411.4	gga:422445	mastermind like transcriptional coactivator 3	mastermind-like 3 (Drosophila)
RAP1B	9031.ENSGALP00000016120	https://smart.embl.de/smart/DDvec.cgi?smart=184:RAS(1|168)+	Ras-related protein Rap-1b; Probable GTP-binding protein that possesses GTPase activity. May play a role in endothelial cell polarity and endothelial barrier function (By similarity)	417840	417840	AJ719603	AJ721013	CAG31262.1	CAG32672.1	ENSGALG00000009927	ENSGALG00000009927	ENSGALG00000009927	ENSGALP00000016120	ENSGALP00000016120	ENSGALT00000016139	ENSGALT00000016139	Gga.18937	NM_001007852	NM_001007852.1	NP_001007853	NP_001007853	NP_001007853.1	NP_001007853.1	NP_001007853.1	Q5ZHX1	Q5ZHX1	Q5ZHX1	RAP1B	RAP1B	RAP1B	RAP1B	RAP1B	RAP1B	RAP1B, member of RAS oncogene family	RAP1B-201	RAP1B_CHICK	RAP1B_CHICK	RCJMB04_32g9	RCJMB04_32g9	RCJMB04_4h13	RCJMB04_4h13	Ras-related protein Rap-1b	Ras-related protein Rap-1b	UPI0000001221	XP_015137180.1	XP_015137180.1	gga:417840
PTCH1	9031.ENSGALP00000020572	https://smart.embl.de/smart/DDvec.cgi?smart=1443:Pfam_Sterol-sensing(463|617)+Pfam_Patched(967|1180)+	Protein patched homolog 1; Acts as a receptor for sonic hedgehog (SHH), indian hedgehog (IHH) and desert hedgehog (DHH). Associates with the smoothened protein (SMO) to transduce the hedgehog's proteins signal; Belongs to the patched family	AAN74869.1	AH012181	ENSGALG00000012620	ENSGALG00000012620	ENSGALG00000012620	ENSGALP00000020572	ENSGALP00000020572	ENSGALP00000020572	ENSGALP00000033440	ENSGALT00000020601	ENSGALT00000020601	ENSGALT00000020601	ENSGALT00000034082	F1NYG9	Gallus gallus patched 1 (PTCH1), mRNA.	Gallus gallus patched 1 (PTCH1), mRNA.	Gga.17559	Gga.474	NM_204960	NM_204960.1	NP_990291	NP_990291	NP_990291.1	PTC	PTC	PTC	PTC1	PTC1_CHICK	PTCH	PTCH	PTCH	PTCH1	PTCH1	PTCH1	PTCH1	PTCH1-201	Protein patched homolog 1	Q6EML3	Q90693	UPI0002C882D1	gga:395806	patched 1
ITGA2	9031.ENSGALP00000023991	https://smart.embl.de/smart/DDvec.cgi?smart=1175:SIGNAL(1|21)+Int_alpha(36|88)+VWA(164|354)+Int_alpha(424|475)+Int_alpha(478|534)+Int_alpha(541|596)+Int_alpha(605|663)+TRANS(1123|1145)+	Integrin, alpha 2 (CD49B, alpha 2 subunit of VLA-2 receptor)	100857227	100857227	AC189861	CD49B	ENSGALG00000014903	ENSGALG00000014903	ENSGALG00000014903	ENSGALP00000023991	ENSGALP00000023991	ENSGALP00000023991	ENSGALT00000024037	ENSGALT00000024037	ENSGALT00000024037	F1N8T2	F1N8T2	F1N8T2	F1N8T2_CHICK	F1N8T2_CHICK	ITGA2	ITGA2	ITGA2	ITGA2	ITGA2	ITGA2	ITGA2-201	Integrin subunit alpha 2	Integrin subunit alpha 2	UPI0002C87B24	XM_003642982	XM_003642982.2	XP_003643030	XP_003643030	XP_003643030.2	XP_003643030.2	XP_003643030.2	gga:100857227	integrin subunit alpha 2
IQGAP2	9031.ENSGALP00000024116	https://smart.embl.de/smart/DDvec.cgi?smart=1575:CH(43|152)+COIL(164|193)+IQ(657|679)+IQ(687|709)+IQ(717|739)+IQ(747|769)+RasGAP(903|1256)+Pfam_RasGAP_C(1365|1498)+	Gallus gallus IQ motif containing GTPase activating protein 2 (IQGAP2), mRNA	427211	A0A1D5P2U7	A0A1D5P2U7_CHICK	AC189006	E1C2F9	ENSGALG00000014978	ENSGALG00000014978	ENSGALG00000014978	ENSGALP00000024116	ENSGALP00000024116	ENSGALP00000024116	ENSGALT00000024162	ENSGALT00000024162	ENSGALT00000024162	IQ motif containing GTPase activating protein 1	IQ motif containing GTPase activating protein 2	IQGAP2	IQGAP2	IQGAP2	IQGAP2	IQGAP2-201	NM_001277778	NM_001277778.1	NP_001264707	NP_001264707	NP_001264707.1	NP_001264707.1	UPI0002C87A30	gga:427211
FYN	9031.ENSGALP00000024180	https://smart.embl.de/smart/DDvec.cgi?smart=534:SH3(85|142)+SH2(147|237)+TyrKc(268|517)+	Tyrosine-protein kinase Fyn; Tyrosine-protein kinase implicated in the control of cell growth. Plays a role in the regulation of intracellular calcium levels. Required in brain development and mature brain function with important roles in the regulation of axon growth, axon guidance, and neurite extension. Role in CNTN1-mediated signaling	2.7.10.2	2L2P	2LP5	3CQT	AADN03003102	EC 2.7.10.2	ENSGALG00000015022	ENSGALG00000015022	ENSGALG00000015022	ENSGALP00000024180	ENSGALP00000024180	ENSGALP00000024180	ENSGALP00000036526	ENSGALT00000024226	ENSGALT00000024226	ENSGALT00000024226	ENSGALT00000037319	F1NQU9	FYN	FYN	FYN	FYN	FYN proto-oncogene, Src family tyrosine kinase	FYN-201	FYN_CHICK	Gga.48382	NM_205349	NM_205349.1	NP_990680	NP_990680	NP_990680.1	Proto-oncogene c-Fyn	Q05876	Tyrosine-protein kinase Fyn	UPI0002C88241	gga:396294	p59-Fyn
IL1R1	9031.ENSGALP00000027049	https://smart.embl.de/smart/DDvec.cgi?smart=555:SIGNAL(1|23)+IG(28|116)+IG(129|222)+IG_like(237|333)+TRANS(340|362)+TIR(387|543)+	Uncharacterized protein; Gallus gallus interleukin 1 receptor, type I (IL1R1), mRNA	396481	396481	AADN03000310	ENSGALG00000016783	ENSGALG00000016783	ENSGALG00000016783	ENSGALP00000027049	ENSGALP00000027049	ENSGALP00000027049	ENSGALP00000035792	ENSGALT00000027100	ENSGALT00000027100	ENSGALT00000027100	ENSGALT00000036580	F1N9V8	F1N9V8	F1N9V8	F1P4T7	F1P4T7	F1P4T7	F1P4T7_CHICK	F1P4T7_CHICK	Gga.31880	Gga.846	IL1R1	IL1R1	IL1R1	IL1R1	IL1R1	IL1R1-201	IL1R1-202	NM_205485	NM_205485.1	NP_990816	NP_990816	NP_990816.1	UPI0000ECD58D	Uncharacterized protein	Uncharacterized protein	XP_015133178.1	XP_015133178.1	gga:396481	interleukin 1 receptor, type I
TLR7	9031.ENSGALP00000035830	https://smart.embl.de/smart/DDvec.cgi?smart=1051:SIGNAL(1|29)+LRRNT(37|69)+LRR_TYP(126|149)+LRR(150|170)+LRR_TYP(203|226)+LRR_TYP(288|311)+LRR(395|418)+LRR(518|542)+LRR(543|566)+LRR(567|590)+LRR_TYP(651|674)+LRR_TYP(700|723)+LRR(727|747)+LRR(749|771)+LRRCT(785|836)+TRANS(845|867)+Pfam_TIR(892|1050)+	Gallus gallus toll-like receptor 7 (TLR7), mRNA	418638	418638	ACR26208.1	ACR26209.1	ACR26210.1	ACR26211.1	ACR26212.1	ACR26213.1	ACR26214.1	ACR26215.1	ACR26216.1	ACR26217.1	ACR26218.1	ACR26219.1	ACR26220.1	ACR26221.1	ACR26222.1	ACR26223.1	ACR26224.1	ACR26225.1	ACR26232.1	ACR26233.1	ACR26234.1	ACR26235.1	ACR26236.1	ACR26237.1	ACR26238.1	ACR26239.1	ACR26240.1	ACR26241.1	ACR26242.1	ACR26243.1	ACR26244.1	ACR26245.1	ACR26246.1	ACR26247.1	ACR26248.1	ACR26249.1	ACR26250.1	ACR26251.1	C4PCM1	ENSGALG00000016590	ENSGALG00000016590	ENSGALG00000016590	ENSGALP00000026726	ENSGALP00000026727
IL7	9031.ENSGALP00000035870	https://smart.embl.de/smart/DDvec.cgi?smart=145:SIGNAL(1|23)+	Uncharacterized protein; Gallus gallus interleukin 7 (IL7), mRNA	A0A1D5PGZ3	A0A1D5PGZ3_CHICK	ENSGALG00000022798	ENSGALG00000022798	ENSGALG00000022798	ENSGALP00000035870	ENSGALP00000035870	ENSGALT00000036659	ENSGALT00000036659	F1NAX2	Gallus gallus interleukin 7 (IL7), mRNA.	Gallus gallus interleukin 7 (IL7), mRNA.	IL-7	IL7	IL7	IL7	IL7	IL7-201	NM_001037833	NM_001037833.1	NP_001032922	NP_001032922	NP_001032922.1	UPI0000ECD12F	Uncharacterized protein	gga:420193	interleukin 7
F13A1	9031.ENSGALP00000036433	https://smart.embl.de/smart/DDvec.cgi?smart=736:Pfam_Transglut_N(52|172)+TGc(314|407)+Pfam_Transglut_C(526|630)+Pfam_Transglut_C(638|735)+	Gallus gallus coagulation factor XIII, A1 polypeptide (F13A1), mRNA	2.3.2.13	Coagulation factor XIII A chain	Coagulation factor XIII A chain	E1BWG1	E1BWG1	E1BWG1	E1BWG1_CHICK	E1BWG1_CHICK	EC 2.3.2.13	ENSGALG00000012802	ENSGALG00000012802	ENSGALG00000012802	ENSGALP00000020857	ENSGALP00000020857	ENSGALP00000036433	ENSGALP00000036433	ENSGALT00000020886	ENSGALT00000020886	ENSGALT00000037229	ENSGALT00000037229	F13A1	F13A1	F13A1	F13A1	F13A1	F13A1-201	F13A1-202	F1NTJ0	F1NTJ0	F1NTJ0	Gga.226	NM_204685	NM_204685.1	NP_990016	NP_990016	NP_990016.1	UPI00003ABCAE	coagulation factor XIII A chain	gga:395420
RAC2	9031.ENSGALP00000037001	https://smart.embl.de/smart/DDvec.cgi?smart=192:RHO(6|179)+	Gallus gallus ras-related C3 botulinum toxin substrate 2 (rho family, small GTP binding protein Rac2) (RAC2), mRNA; Belongs to the small GTPase superfamily. Rho family	418044	418044	AJ851813	CAH65447.1	ENSGALG00000012456	ENSGALG00000012456	ENSGALG00000012456	ENSGALP00000020333	ENSGALP00000037001	ENSGALP00000037001	ENSGALT00000020360	ENSGALT00000037796	ENSGALT00000037796	Gga.34362	NM_001201452	NM_001201452.1	NP_001188381	NP_001188381	NP_001188381.1	NP_001188381.1	NP_001188381.1	Q5F337	Q5F337	Q5F337	Q5F337_CHICK	Q5F337_CHICK	RAC2	RAC2	RAC2	RAC2	RAC2	RAC2	RAC2-201	RCJMB04_38b23	RCJMB04_38b23	UPI000035DAF0	gga:418044
TLR2-2	9031.ENSGALP00000038134	https://smart.embl.de/smart/DDvec.cgi?smart=518:SIGNAL(1|22)+LRR(76|98)+LRR(100|122)+LRR(148|171)+LRR(356|381)+LRR(383|405)+LRR(409|432)+LRR(473|496)+	Toll-like receptor 2 type-2; Participates in the innate immune response to microbial agents. Acts via MYD88 and TRAF6, leading to NF-kappa-B activation, cytokine secretion and the inflammatory response. Mediates the response to mycoplasmal macrophage-activating lipopeptide-2kD (MALP-2)	AADN03004167	ACI23556.1	B6E2R4	ENSGALG00000009239	ENSGALG00000009239	ENSGALG00000009239	ENSGALP00000015020	ENSGALP00000038134	ENSGALP00000038134	ENSGALP00000038134	ENSGALT00000015036	ENSGALT00000038924	ENSGALT00000038924	ENSGALT00000038924	F1NUH0	FJ197821	Gga.46177	NM_001161650	NM_001161650.1	NP_001155122	NP_001155122.1	Q9DGB6	TLR2	TLR2-2	TLR2-2	TLR2-2	TLR2-2-201	TLR22_CHICK	TLR2B	TLR2L	Toll-like receptor 2 type-2	UPI0002C87D9F	XP_015156866	gga:100858824	toll-like receptor 2 type-1-like
GIT1	9031.ENSGALP00000038832	https://smart.embl.de/smart/DDvec.cgi?smart=640:ANK(32|61)+ANK(66|95)+ANK(99|128)+GIT(164|194)+GIT(228|258)+Pfam_GIT_CC(307|372)+Pfam_GIT1_C(517|633)+	GIT ArfGAP 1; Gallus gallus G protein-coupled receptor kinase interactor 1 (GIT1), mRNA	417584	417584	AAG17205.1	AF216970	E1BYJ4	E1BYJ4	E1BYJ4	ENSGALG00000023703	ENSGALG00000023703	ENSGALG00000023703	ENSGALP00000038832	ENSGALP00000038832	ENSGALP00000038832	ENSGALT00000039622	ENSGALT00000039622	ENSGALT00000039622	GIT ArfGAP 1	GIT ArfGAP 1	GIT1	GIT1	GIT1	GIT1	GIT1	GIT1-201	Gga.921	NM_204296	NM_204296.1	NP_989627	NP_989627	NP_989627.1	NP_989627.1	NP_989627.1	Q9DG15	Q9DG15	Q9DG15	Q9DG15_CHICK	Q9DG15_CHICK	UPI0002C872A3	gga:417584	p95-APP1	p95-APP1	p95-APP1
TBXA2R	9031.ENSGALP00000040720	https://smart.embl.de/smart/DDvec.cgi?smart=355:Pfam_7tm_1(51|318)+	Thromboxane A2 receptor	A0A1D5P7R6	A0A1D5P7R6_CHICK	AADN03008917	AADN03009037	ENSGALG00000027241	ENSGALG00000027241	ENSGALG00000027241	ENSGALP00000040720	ENSGALP00000040720	ENSGALT00000042748	ENSGALT00000042748	R4GFD2	TBXA2R	TBXA2R	TBXA2R	TBXA2R	TBXA2R-201	Thromboxane A2 receptor	Thromboxane A2 receptor	UPI0002C87D72	XM_003642841	XM_003642841.2	XP_003642889	XP_003642889.2	XP_015155258	gga:100857635	thromboxane A2 receptor	thromboxane A2 receptor
VAV1	9031.ENSGALP00000041692	https://smart.embl.de/smart/DDvec.cgi?smart=131:SH3(71|127)+	Vav 1 guanine nucleotide exchange factor	ENSGALG00000025942	ENSGALG00000025942	ENSGALG00000025942	ENSGALP00000041692	ENSGALP00000041692	ENSGALT00000045661	ENSGALT00000045661	R4GHX4	UPI0002C87CDC	VAV	VAV1	VAV1-201	Vav 1 guanine nucleotide exchange factor	vav 1 guanine nucleotide exchange factor
MYD88	9031.ENSGALP00000042597	https://smart.embl.de/smart/DDvec.cgi?smart=299:DEATH(21|113)+TIR(163|299)+	Myeloid differentiation primary response protein MyD88; Adapter protein involved in the Toll-like receptor and IL-1 receptor signaling pathway in the innate immune response	420420	420420	A0FIQ0	A0FIQ0	A0FIQ0	A5HNF6	A5HNF6	A5HNF6	AADN03001896	ABJ98316.1	ABQ17966.1	AJ851640	CAH65274.1	EF011109	EF544486	ENSGALG00000005947	ENSGALG00000005947	ENSGALG00000005947	ENSGALP00000009551	ENSGALP00000009551	ENSGALP00000038167	ENSGALP00000042597	ENSGALP00000042597	ENSGALT00000009565	ENSGALT00000009565	ENSGALT00000038957	ENSGALT00000044477	ENSGALT00000044477	F1NBX6	Gga.17397	MYD88	MYD88	MYD88	MYD88	MYD88	MYD88	MYD88-201	MYD88-202	MYD88_CHICK	MYD88_CHICK	NM_001030962	NM_001030962.1	NP_001026133	NP_001026133	NP_001026133.1	NP_001026133.2
TLR3	9031.ENSGALP00000043092	https://smart.embl.de/smart/DDvec.cgi?smart=896:SIGNAL(1|26)+LRRNT(28|56)+LRR_TYP(99|122)+LRR(146|169)+LRR(170|193)+LRR(197|219)+LRR(274|296)+LRR(297|320)+LRR(345|368)+LRR(369|394)+LRR(398|420)+LRR(421|445)+LRR_TYP(496|519)+LRR(520|543)+LRR(552|575)+LRR_TYP(576|599)+LRR(601|623)+LRRCT(636|688)+TRANS(697|719)+TIR(746|892)+	Gallus gallus toll-like receptor 3 (TLR3), mRNA	ADF80619.1	D6R3D0	ENSGALG00000013468	ENSGALG00000013468	ENSGALG00000013468	ENSGALP00000021912	ENSGALP00000021913	ENSGALP00000021914	ENSGALP00000021914	ENSGALP00000043092	ENSGALP00000043092	ENSGALT00000021950	ENSGALT00000021951	ENSGALT00000021952	ENSGALT00000021952	ENSGALT00000043572	ENSGALT00000043572	F1NG27	Gallus gallus toll-like receptor 3 (TLR3), mRNA.	Gallus gallus toll-like receptor 3 (TLR3), mRNA.	Gga.47931	HM059817	NM_001011691	NM_001011691.3	NP_001011691	NP_001011691	NP_001011691.3	R4GLK5	TLR3	TLR3	TLR3	TLR3	TLR3-201	TLR3-202	UPI0002C8678D	UPI0002C86864	gga:422720	toll like receptor 3
[truncated: 81 more columns]

## Sheet: enrichment.SMART
#term ID	term description	observed gene count	background gene count	false discovery rate	matching proteins in your network (IDs)	matching proteins in your network (labels)
SM00255	Toll - interleukin 1 - resistance	6	14	2.28e-11	ENSGALP00000011319,ENSGALP00000013260,ENSGALP00000015286,ENSGALP00000027049,ENSGALP00000042597,ENSGALP00000043092	IL1R1,MYD88,TLR15,TLR3,TLR4,TLR5
SM00082	Leucine rich repeat C-terminal domain	5	81	6.37e-06	ENSGALP00000011319,ENSGALP00000013260,ENSGALP00000015286,ENSGALP00000035830,ENSGALP00000043092	TLR15,TLR3,TLR4,TLR5,TLR7
SM00370	Leucine-rich repeats, outliers	6	190	1.15e-05	ENSGALP00000011319,ENSGALP00000013260,ENSGALP00000015286,ENSGALP00000035830,ENSGALP00000038134,ENSGALP00000043092	TLR15,TLR2-2,TLR3,TLR4,TLR5,TLR7
SM00369	Leucine-rich repeats, typical (most populated) subfamily	4	117	0.00048	ENSGALP00000013260,ENSGALP00000015286,ENSGALP00000035830,ENSGALP00000043092	TLR15,TLR3,TLR5,TLR7
SM01241	Integrins are a group of transmembrane proteins which function as extracellular matrix receptors and in cell adhesion. Integrins are ubiquitously expressed and are heterodimeric, each composed of an alpha and beta subunit. Several variations of the ...	2	5	0.00048	ENSGALP00000000518,ENSGALP00000012130	ITGB2,ITGB3
SM01242	This is the beta tail domain of the Integrin protein. Integrins are receptors which are involved in cell-cell and cell-extracellular matrix interactions.	2	6	0.00048	ENSGALP00000000518,ENSGALP00000012130	ITGB2,ITGB3
SM00187	Integrin beta subunits (N-terminal portion of extracellular region)	2	7	0.0005	ENSGALP00000000518,ENSGALP00000012130	ITGB2,ITGB3
SM00191	Integrin alpha (beta-propellor repeats).	2	11	0.0009	ENSGALP00000004173,ENSGALP00000023991	ITGA2,ITGAV
SM00327	von Willebrand factor (vWF) type A domain	3	64	0.0009	ENSGALP00000000518,ENSGALP00000012130,ENSGALP00000023991	ITGA2,ITGB2,ITGB3
SM00423	domain found in Plexins, Semaphorins and Integrins	2	38	0.0073	ENSGALP00000000518,ENSGALP00000012130	ITGB2,ITGB3
SM00013	Leucine rich repeat N-terminal domain	2	81	0.0275	ENSGALP00000035830,ENSGALP00000043092	TLR3,TLR7
SM00252	Src homology 2 domains	2	93	0.0326	ENSGALP00000003116,ENSGALP00000024180	FYN,LOC419429

## Sheet: enrichment.RCTM
#term ID	term description	observed gene count	background gene count	false discovery rate	matching proteins in your network (IDs)	matching proteins in your network (labels)
GGA-168898	Toll-like Receptor Cascades	5	76	4.99e-05	ENSGALP00000011319,ENSGALP00000012130,ENSGALP00000012873,ENSGALP00000035830,ENSGALP00000042597	ITGB2,MYD88,TLR4,TLR7,TRAF6
GGA-975110	TRAF6 mediated IRF7 activation in TLR7/8 or 9 signaling	3	5	4.99e-05	ENSGALP00000012873,ENSGALP00000035830,ENSGALP00000042597	MYD88,TLR7,TRAF6
GGA-166016	Toll Like Receptor 4 (TLR4) Cascade	4	67	0.00043	ENSGALP00000011319,ENSGALP00000012130,ENSGALP00000012873,ENSGALP00000042597	ITGB2,MYD88,TLR4,TRAF6
GGA-168256	Immune System	9	936	0.0011	ENSGALP00000008911,ENSGALP00000011319,ENSGALP00000012130,ENSGALP00000012873,ENSGALP00000016120,ENSGALP00000024116,ENSGALP00000027049,ENSGALP00000035830,ENSGALP00000042597	BLB2,IL1R1,IQGAP2,ITGB2,MYD88,RAP1B,TLR4,TLR7,TRAF6
GGA-168249	Innate Immune System	7	550	0.0015	ENSGALP00000011319,ENSGALP00000012130,ENSGALP00000012873,ENSGALP00000016120,ENSGALP00000024116,ENSGALP00000035830,ENSGALP00000042597	IQGAP2,ITGB2,MYD88,RAP1B,TLR4,TLR7,TRAF6
GGA-216083	Integrin cell surface interactions	3	36	0.0015	ENSGALP00000000518,ENSGALP00000012130,ENSGALP00000023991	ITGA2,ITGB2,ITGB3
GGA-162582	Signal Transduction	10	1370	0.0018	ENSGALP00000000518,ENSGALP00000004924,ENSGALP00000012873,ENSGALP00000015937,ENSGALP00000016120,ENSGALP00000023991,ENSGALP00000024116,ENSGALP00000037001,ENSGALP00000040720,ENSGALP00000042597	IQGAP2,ITGA2,ITGB3,MAML3,MYD88,NCOR2,RAC2,RAP1B,TBXA2R,TRAF6
GGA-168138	Toll Like Receptor 9 (TLR9) Cascade	3	44	0.0018	ENSGALP00000012873,ENSGALP00000035830,ENSGALP00000042597	MYD88,TLR7,TRAF6
GGA-168181	Toll Like Receptor 7/8 (TLR7/8) Cascade	3	44	0.0018	ENSGALP00000012873,ENSGALP00000035830,ENSGALP00000042597	MYD88,TLR7,TRAF6
GGA-975138	TRAF6 mediated induction of NFkB and MAP kinases upon TLR7/8 or 9 activation	3	43	0.0018	ENSGALP00000012873,ENSGALP00000035830,ENSGALP00000042597	MYD88,TLR7,TRAF6
GGA-975155	MyD88 dependent cascade initiated on endosome	3	44	0.0018	ENSGALP00000012873,ENSGALP00000035830,ENSGALP00000042597	MYD88,TLR7,TRAF6
GGA-166166	MyD88-independent TLR4 cascade	3	56	0.002	ENSGALP00000011319,ENSGALP00000012873,ENSGALP00000042597	MYD88,TLR4,TRAF6
GGA-193639	p75NTR signals via NF-kB	2	9	0.002	ENSGALP00000012873,ENSGALP00000042597	MYD88,TRAF6
GGA-209543	p75NTR recruits signalling complexes	2	8	0.002	ENSGALP00000012873,ENSGALP00000042597	MYD88,TRAF6
GGA-3000170	Syndecan interactions	2	10	0.002	ENSGALP00000000518,ENSGALP00000023991	ITGA2,ITGB3
GGA-354194	GRB2:SOS provides linkage to MAPK signaling for Integrins	2	9	0.002	ENSGALP00000000518,ENSGALP00000016120	ITGB3,RAP1B
GGA-372708	p130Cas linkage to MAPK signaling for integrins	2	10	0.002	ENSGALP00000000518,ENSGALP00000016120	ITGB3,RAP1B
GGA-446652	Interleukin-1 family signaling	3	62	0.002	ENSGALP00000012873,ENSGALP00000027049,ENSGALP00000042597	IL1R1,MYD88,TRAF6
GGA-9020702	Interleukin-1 signaling	3	55	0.002	ENSGALP00000012873,ENSGALP00000027049,ENSGALP00000042597	IL1R1,MYD88,TRAF6
GGA-937061	TRIF(TICAM1)-mediated TLR4 signaling	3	56	0.002	ENSGALP00000011319,ENSGALP00000012873,ENSGALP00000042597	MYD88,TLR4,TRAF6
GGA-937072	TRAF6-mediated induction of TAK1 complex within TLR4 complex	2	10	0.002	ENSGALP00000011319,ENSGALP00000012873	TLR4,TRAF6
GGA-109582	Hemostasis	5	340	0.0022	ENSGALP00000000518,ENSGALP00000012130,ENSGALP00000016120,ENSGALP00000036433,ENSGALP00000040720	F13A1,ITGB2,ITGB3,RAP1B,TBXA2R
GGA-354192	Integrin alphaIIb beta3 signaling	2	15	0.0022	ENSGALP00000000518,ENSGALP00000016120	ITGB3,RAP1B
GGA-433794	TLR4 cascade	2	14	0.0022	ENSGALP00000012873,ENSGALP00000042597	MYD88,TRAF6
GGA-433822	NFkB and MAPK activation mediated by TRAF6	2	14	0.0022	ENSGALP00000012873,ENSGALP00000042597	MYD88,TRAF6
GGA-437987	Toll-like receptors (TLR) cascades	2	16	0.0022	ENSGALP00000012873,ENSGALP00000042597	MYD88,TRAF6
GGA-451477	MyD88-dependent cascade initiated on endosome membrane	2	12	0.0022	ENSGALP00000012873,ENSGALP00000042597	MYD88,TRAF6
GGA-451498	TLR7 cascade	2	12	0.0022	ENSGALP00000012873,ENSGALP00000042597	MYD88,TRAF6
GGA-451514	MyD88:TIRAP-dependent cascade initiated on plasma membrane	2	14	0.0022	ENSGALP00000012873,ENSGALP00000042597	MYD88,TRAF6
GGA-451529	TLR15 cascade	2	14	0.0022	ENSGALP00000012873,ENSGALP00000042597	MYD88,TRAF6
GGA-451531	TLR21 cascade	2	12	0.0022	ENSGALP00000012873,ENSGALP00000042597	MYD88,TRAF6
GGA-451534	TLR5 cascade	2	14	0.0022	ENSGALP00000012873,ENSGALP00000042597	MYD88,TRAF6
GGA-517856	TLR2 subfamily cascade	2	14	0.0022	ENSGALP00000012873,ENSGALP00000042597	MYD88,TRAF6
GGA-573298	NFkB and MAPK activation mediated by TRAF6 upon TLR7 or TLR21 stimulation	2	12	0.0022	ENSGALP00000012873,ENSGALP00000042597	MYD88,TRAF6
GGA-76002	Platelet activation, signaling and aggregation	4	177	0.0022	ENSGALP00000000518,ENSGALP00000016120,ENSGALP00000036433,ENSGALP00000040720	F13A1,ITGB3,RAP1B,TBXA2R
GGA-9006921	Integrin signaling	2	15	0.0022	ENSGALP00000000518,ENSGALP00000016120	ITGB3,RAP1B
GGA-936964	Activation of IRF3/IRF7 mediated by TBK1/IKK epsilon	2	13	0.0022	ENSGALP00000011319,ENSGALP00000042597	MYD88,TLR4
GGA-977240	MyD88 cascade initiated on plasma membrane	2	14	0.0022	ENSGALP00000012873,ENSGALP00000042597	MYD88,TRAF6
GGA-3000178	ECM proteoglycans	2	19	0.0028	ENSGALP00000000518,ENSGALP00000023991	ITGA2,ITGB3
GGA-3000171	Non-integrin membrane-ECM interactions	2	20	0.003	ENSGALP00000000518,ENSGALP00000023991	ITGA2,ITGB3
GGA-76009	Platelet Aggregation (Plug Formation)	2	22	0.0035	ENSGALP00000000518,ENSGALP00000016120	ITGB3,RAP1B
GGA-5674135	MAP2K and MAPK activation	2	25	0.0044	ENSGALP00000000518,ENSGALP00000016120	ITGB3,RAP1B
GGA-8875878	MET promotes cell motility	2	29	0.0056	ENSGALP00000016120,ENSGALP00000023991	ITGA2,RAP1B
GGA-2422406	Innate Immune System	2	32	0.0066	ENSGALP00000012873,ENSGALP00000042597	MYD88,TRAF6
GGA-1474244	Extracellular matrix organization	3	145	0.0089	ENSGALP00000000518,ENSGALP00000012130,ENSGALP00000023991	ITGA2,ITGB2,ITGB3
GGA-168164	Toll Like Receptor 3 (TLR3) Cascade	2	41	0.01	ENSGALP00000012873,ENSGALP00000042597	MYD88,TRAF6
GGA-449147	Signaling by Interleukins	3	177	0.0147	ENSGALP00000012873,ENSGALP00000027049,ENSGALP00000042597	IL1R1,MYD88,TRAF6
GGA-6806834	Signaling by MET	2	55	0.0168	ENSGALP00000016120,ENSGALP00000023991	ITGA2,RAP1B
GGA-193704	p75 NTR receptor-mediated signalling	2	60	0.0193	ENSGALP00000012873,ENSGALP00000042597	MYD88,TRAF6
GGA-1280215	Cytokine Signaling in Immune system	3	214	0.0233	ENSGALP00000012873,ENSGALP00000027049,ENSGALP00000042597	IL1R1,MYD88,TRAF6
GGA-73887	Death Receptor Signalling	2	83	0.0342	ENSGALP00000012873,ENSGALP00000042597	MYD88,TRAF6
GGA-9006934	Signaling by Receptor Tyrosine Kinases	3	284	0.0478	ENSGALP00000000518,ENSGALP00000016120,ENSGALP00000023991	ITGA2,ITGB3,RAP1B

## Sheet: enrichment.Process
#term ID	term description	observed gene count	background gene count	false discovery rate	matching proteins in your network (IDs)	matching proteins in your network (labels)
GO:0002757	immune response-activating signal transduction	3	18	0.0017	ENSGALP00000024180,ENSGALP00000038134,ENSGALP00000042597	FYN,MYD88,TLR2-2
GO:0002755	MyD88-dependent toll-like receptor signaling pathway	2	4	0.0029	ENSGALP00000038134,ENSGALP00000042597	MYD88,TLR2-2
GO:0002758	innate immune response-activating signal transduction	2	7	0.0031	ENSGALP00000038134,ENSGALP00000042597	MYD88,TLR2-2
GO:0007165	signal transduction	6	391	0.0031	ENSGALP00000004173,ENSGALP00000016120,ENSGALP00000020572,ENSGALP00000024180,ENSGALP00000038134,ENSGALP00000042597	FYN,ITGAV,MYD88,PTCH1,RAP1B,TLR2-2
GO:0045087	innate immune response	3	52	0.0031	ENSGALP00000024180,ENSGALP00000038134,ENSGALP00000042597	FYN,MYD88,TLR2-2
GO:0048584	positive regulation of response to stimulus	4	164	0.0037	ENSGALP00000016120,ENSGALP00000024180,ENSGALP00000038134,ENSGALP00000042597	FYN,MYD88,RAP1B,TLR2-2
GO:0043902	positive regulation of multi-organism process	2	25	0.0089	ENSGALP00000038134,ENSGALP00000042597	MYD88,TLR2-2
GO:0006954	inflammatory response	2	35	0.0153	ENSGALP00000038134,ENSGALP00000042597	MYD88,TLR2-2
GO:0051704	multi-organism process	3	153	0.0189	ENSGALP00000024180,ENSGALP00000038134,ENSGALP00000042597	FYN,MYD88,TLR2-2
GO:1903530	regulation of secretion by cell	2	49	0.0243	ENSGALP00000016120,ENSGALP00000038134	RAP1B,TLR2-2
GO:0007166	cell surface receptor signaling pathway	3	214	0.0397	ENSGALP00000004173,ENSGALP00000020572,ENSGALP00000024180	FYN,ITGAV,PTCH1
GO:1902533	positive regulation of intracellular signal transduction	2	74	0.0469	ENSGALP00000016120,ENSGALP00000042597	MYD88,RAP1B

## Sheet: enrichment.PMID
#term ID	term description	observed gene count	background gene count	false discovery rate	matching proteins in your network (IDs)	matching proteins in your network (labels)
PMID:32438067	(2020) Recombinant glutathione-S-transferase A3 protein regulates the angiogenesis-related genes of erythrocytes in thiram induced tibial lesions.	15	17	2.11e-31	ENSGALP00000000518,ENSGALP00000004173,ENSGALP00000004924,ENSGALP00000012130,ENSGALP00000015937,ENSGALP00000016120,ENSGALP00000020572,ENSGALP00000023991,ENSGALP00000024116,ENSGALP00000024180,ENSGALP00000027049,ENSGALP00000037001,ENSGALP00000038832,ENSGALP00000040720,ENSGALP00000041692	FYN,GIT1,IL1R1,IQGAP2,ITGA2,ITGAV,ITGB2,ITGB3,MAML3,NCOR2,PTCH1,RAC2,RAP1B,TBXA2R,VAV1
PMID:31941444	(2020) Transcriptome-based screening of intracellular pathways and angiogenesis related genes at different stages of thiram induced tibial lesions in broiler chickens.	9	15	1.74e-16	ENSGALP00000004173,ENSGALP00000004924,ENSGALP00000016120,ENSGALP00000020572,ENSGALP00000024116,ENSGALP00000024180,ENSGALP00000036433,ENSGALP00000038832,ENSGALP00000040720	F13A1,FYN,GIT1,IQGAP2,ITGAV,NCOR2,PTCH1,RAP1B,TBXA2R
PMID:32818575	(2020) Integration of gene expression profile data to screen and verify immune-related genes of chicken erythrocytes involved in Marek's disease virus.	9	17	2.77e-16	ENSGALP00000011319,ENSGALP00000012873,ENSGALP00000013260,ENSGALP00000015286,ENSGALP00000035830,ENSGALP00000035870,ENSGALP00000038134,ENSGALP00000042597,ENSGALP00000043092	IL7,MYD88,TLR15,TLR2-2,TLR3,TLR4,TLR5,TLR7,TRAF6
PMID:32818608	(2020) Screening of toll-like receptor signaling pathway-related genes and the response of recombinant glutathione S-transferase A3 protein to thiram induced apoptosis in chicken erythrocytes.	8	10	2.28e-15	ENSGALP00000012873,ENSGALP00000013260,ENSGALP00000015286,ENSGALP00000035830,ENSGALP00000035870,ENSGALP00000038134,ENSGALP00000042597,ENSGALP00000043092	IL7,MYD88,TLR15,TLR2-2,TLR3,TLR5,TLR7,TRAF6
PMID:30800129	(2019) Immunostimulatory Activities of CpG-Oligodeoxynucleotides in Teleosts: Toll-Like Receptors 9 and 21.	8	18	6.45e-14	ENSGALP00000011319,ENSGALP00000012873,ENSGALP00000013260,ENSGALP00000015286,ENSGALP00000035830,ENSGALP00000038134,ENSGALP00000042597,ENSGALP00000043092	MYD88,TLR15,TLR2-2,TLR3,TLR4,TLR5,TLR7,TRAF6
PMID:27233799	(2016) Activation of toll-like receptor signaling pathways leading to nitric oxide-mediated antiviral responses.	8	21	1.47e-13	ENSGALP00000011319,ENSGALP00000012873,ENSGALP00000013260,ENSGALP00000015286,ENSGALP00000035830,ENSGALP00000038134,ENSGALP00000042597,ENSGALP00000043092	MYD88,TLR15,TLR2-2,TLR3,TLR4,TLR5,TLR7,TRAF6
PMID:22783275	(2012) Gene Expression Analysis of Toll-Like Receptor Pathways in Heterophils from Genetic Chicken Lines that Differ in Their Susceptibility to Salmonella enteritidis.	8	22	1.72e-13	ENSGALP00000011319,ENSGALP00000012873,ENSGALP00000013260,ENSGALP00000015286,ENSGALP00000035830,ENSGALP00000038134,ENSGALP00000042597,ENSGALP00000043092	MYD88,TLR15,TLR2-2,TLR3,TLR4,TLR5,TLR7,TRAF6
PMID:27257554	(2016) Bioinformatics analysis of the structural and evolutionary characteristics for toll-like receptor 15.	7	12	9.67e-13	ENSGALP00000011319,ENSGALP00000013260,ENSGALP00000015286,ENSGALP00000035830,ENSGALP00000038134,ENSGALP00000042597,ENSGALP00000043092	MYD88,TLR15,TLR2-2,TLR3,TLR4,TLR5,TLR7
PMID:28098883	(2017) Developmental expression of Toll-like receptors in the guinea pig lung.	7	12	9.67e-13	ENSGALP00000011319,ENSGALP00000012873,ENSGALP00000015286,ENSGALP00000035830,ENSGALP00000038134,ENSGALP00000042597,ENSGALP00000043092	MYD88,TLR2-2,TLR3,TLR4,TLR5,TLR7,TRAF6
PMID:21619680	(2011) Molecular evolution of the vertebrate TLR1 gene family--a complex history of gene duplication, gene conversion, positive selection and co-evolution.	7	13	1.19e-12	ENSGALP00000011319,ENSGALP00000013260,ENSGALP00000015286,ENSGALP00000035830,ENSGALP00000038134,ENSGALP00000042597,ENSGALP00000043092	MYD88,TLR15,TLR2-2,TLR3,TLR4,TLR5,TLR7
PMID:23112799	(2012) TIR8SIGIRR is an Interleukin-1 ReceptorToll Like Receptor Family Member with Regulatory Functions in Inflammation and Immunity.	8	31	1.19e-12	ENSGALP00000011319,ENSGALP00000012873,ENSGALP00000015286,ENSGALP00000027049,ENSGALP00000035830,ENSGALP00000038134,ENSGALP00000042597,ENSGALP00000043092	IL1R1,MYD88,TLR2-2,TLR3,TLR4,TLR5,TLR7,TRAF6
PMID:27148268	(2016) Regulatory Role of IL-1R8 in Immunity and Disease.	8	33	1.61e-12	ENSGALP00000011319,ENSGALP00000012873,ENSGALP00000024180,ENSGALP00000027049,ENSGALP00000035830,ENSGALP00000038134,ENSGALP00000042597,ENSGALP00000043092	FYN,IL1R1,MYD88,TLR2-2,TLR3,TLR4,TLR7,TRAF6
PMID:22321108	(2011) Regulation of mast cell responses in health and disease.	9	64	1.89e-12	ENSGALP00000011319,ENSGALP00000012873,ENSGALP00000024180,ENSGALP00000035830,ENSGALP00000035870,ENSGALP00000038134,ENSGALP00000041692,ENSGALP00000042597,ENSGALP00000043092	FYN,IL7,MYD88,TLR2-2,TLR3,TLR4,TLR7,TRAF6,VAV1
PMID:31487960	(2019) Immunomodulatory Potential of Tinospora cordifolia and CpG ODN (TLR21 Agonist) against the Very Virulent, Infectious Bursal Disease Virus in SPF Chicks.	7	15	1.89e-12	ENSGALP00000011319,ENSGALP00000013260,ENSGALP00000015286,ENSGALP00000035830,ENSGALP00000038134,ENSGALP00000042597,ENSGALP00000043092	MYD88,TLR15,TLR2-2,TLR3,TLR4,TLR5,TLR7
PMID:20929591	(2010) Unique genome-wide transcriptome profiles of chicken macrophages exposed to Salmonella-derived endotoxin.	8	35	1.96e-12	ENSGALP00000011319,ENSGALP00000012873,ENSGALP00000013260,ENSGALP00000015286,ENSGALP00000035830,ENSGALP00000038134,ENSGALP00000042597,ENSGALP00000043092	MYD88,TLR15,TLR2-2,TLR3,TLR4,TLR5,TLR7,TRAF6
PMID:22201817	(2012) Differential impact of Toll-like receptor signaling on distinct B cell subpopulations.	8	35	1.96e-12	ENSGALP00000011319,ENSGALP00000012873,ENSGALP00000013260,ENSGALP00000015286,ENSGALP00000035830,ENSGALP00000038134,ENSGALP00000042597,ENSGALP00000043092	MYD88,TLR15,TLR2-2,TLR3,TLR4,TLR5,TLR7,TRAF6
PMID:12186654	(2002) Toll-like receptors: a family of pattern-recognition receptors in mammals.	7	16	2.2e-12	ENSGALP00000011319,ENSGALP00000012873,ENSGALP00000015286,ENSGALP00000035830,ENSGALP00000038134,ENSGALP00000042597,ENSGALP00000043092	MYD88,TLR2-2,TLR3,TLR4,TLR5,TLR7,TRAF6
PMID:30070070	(2019) Comparative analysis of early immune responses induced by two strains of Newcastle disease virus in chickens.	7	18	4.07e-12	ENSGALP00000011319,ENSGALP00000013260,ENSGALP00000015286,ENSGALP00000035830,ENSGALP00000038134,ENSGALP00000042597,ENSGALP00000043092	MYD88,TLR15,TLR2-2,TLR3,TLR4,TLR5,TLR7
PMID:25380465	(2015) Differential Toll-like receptor (TLR) mRNA expression patterns during chicken embryological development.	6	7	9.47e-12	ENSGALP00000011319,ENSGALP00000013260,ENSGALP00000015286,ENSGALP00000035830,ENSGALP00000038134,ENSGALP00000043092	TLR15,TLR2-2,TLR3,TLR4,TLR5,TLR7
PMID:30701142	(2019) Effects of Salmonella enterica serovar Enteritidis infection on egg production and the immune response of the laying duck Anas platyrhynchos.	7	21	9.47e-12	ENSGALP00000011319,ENSGALP00000013260,ENSGALP00000015286,ENSGALP00000035830,ENSGALP00000038134,ENSGALP00000042597,ENSGALP00000043092	MYD88,TLR15,TLR2-2,TLR3,TLR4,TLR5,TLR7
PMID:19776194	(2009) Expression profiles of genes in Toll-like receptor-mediated signaling of broilers infected with Clostridium perfringens.	6	8	1.56e-11	ENSGALP00000011319,ENSGALP00000012873,ENSGALP00000013260,ENSGALP00000035830,ENSGALP00000038134,ENSGALP00000042597	MYD88,TLR15,TLR2-2,TLR4,TLR7,TRAF6
PMID:32047904	(2020) IFN-gamma establishes interferon-stimulated gene-mediated antiviral state against Newcastle disease virus in chicken fibroblasts.	8	50	1.73e-11	ENSGALP00000008911,ENSGALP00000011319,ENSGALP00000015286,ENSGALP00000035830,ENSGALP00000035870,ENSGALP00000038134,ENSGALP00000042597,ENSGALP00000043092	BLB2,IL7,MYD88,TLR2-2,TLR3,TLR4,TLR5,TLR7
PMID:30332431	(2018) GPR108, an NF-KB activator suppressed by TIRAP, negatively regulates TLR-triggered immune responses.	7	25	2.21e-11	ENSGALP00000000518,ENSGALP00000011319,ENSGALP00000012873,ENSGALP00000015286,ENSGALP00000035830,ENSGALP00000038134,ENSGALP00000042597	ITGB3,MYD88,TLR2-2,TLR4,TLR5,TLR7,TRAF6
PMID:20528831	(2011) Expression of toll-like receptors in genital tract tissues from normal and HIV-infected men.	6	9	2.27e-11	ENSGALP00000011319,ENSGALP00000015286,ENSGALP00000035830,ENSGALP00000038134,ENSGALP00000042597,ENSGALP00000043092	MYD88,TLR2-2,TLR3,TLR4,TLR5,TLR7
PMID:23024782	(2012) Variation at innate immunity Toll-like receptor genes in a bottlenecked population of a New Zealand robin.	6	9	2.27e-11	ENSGALP00000011319,ENSGALP00000013260,ENSGALP00000015286,ENSGALP00000035830,ENSGALP00000038134,ENSGALP00000043092	TLR15,TLR2-2,TLR3,TLR4,TLR5,TLR7
PMID:24595315	(2014) Episodic positive selection in the evolution of avian toll-like receptor innate immunity genes.	6	9	2.27e-11	ENSGALP00000011319,ENSGALP00000013260,ENSGALP00000015286,ENSGALP00000035830,ENSGALP00000038134,ENSGALP00000043092	TLR15,TLR2-2,TLR3,TLR4,TLR5,TLR7
PMID:27760133	(2016) Diversity in the Toll-Like Receptor Genes of the African Penguin (Spheniscus demersus).	6	9	2.27e-11	ENSGALP00000011319,ENSGALP00000013260,ENSGALP00000015286,ENSGALP00000035830,ENSGALP00000038134,ENSGALP00000043092	TLR15,TLR2-2,TLR3,TLR4,TLR5,TLR7
PMID:25954763	(2015) Progress and challenges toward the development of vaccines against avian infectious bronchitis.	7	26	2.3e-11	ENSGALP00000011319,ENSGALP00000013260,ENSGALP00000015286,ENSGALP00000035830,ENSGALP00000038134,ENSGALP00000042597,ENSGALP00000043092	MYD88,TLR15,TLR2-2,TLR3,TLR4,TLR5,TLR7
PMID:30666212	(2018) Cardiolipotoxicity, Inflammation, and Arrhythmias: Role for Interleukin-6 Molecular Mechanisms.	7	26	2.3e-11	ENSGALP00000011319,ENSGALP00000012873,ENSGALP00000015286,ENSGALP00000035830,ENSGALP00000038134,ENSGALP00000042597,ENSGALP00000043092	MYD88,TLR2-2,TLR3,TLR4,TLR5,TLR7,TRAF6
PMID:25340818	(2014) Multiplexed digital mRNA profiling of the inflammatory response in the West Nile Swiss Webster mouse model.	7	27	2.7e-11	ENSGALP00000011319,ENSGALP00000012130,ENSGALP00000015286,ENSGALP00000035830,ENSGALP00000038134,ENSGALP00000042597,ENSGALP00000043092	ITGB2,MYD88,TLR2-2,TLR3,TLR4,TLR5,TLR7
PMID:32266286	(2020) Conformational Changes Induced by S34Y and R98C Variants in the Death Domain of Myd88.	6	10	2.81e-11	ENSGALP00000011319,ENSGALP00000015286,ENSGALP00000035830,ENSGALP00000038134,ENSGALP00000042597,ENSGALP00000043092	MYD88,TLR2-2,TLR3,TLR4,TLR5,TLR7
PMID:32848313	(2020) Isolation of peripheral blood mononuclear cells and the expression of toll-like receptors in Betong chickens.	6	10	2.81e-11	ENSGALP00000011319,ENSGALP00000013260,ENSGALP00000015286,ENSGALP00000035830,ENSGALP00000038134,ENSGALP00000043092	TLR15,TLR2-2,TLR3,TLR4,TLR5,TLR7
PMID:18656388	(2008) Toll-like receptors activate innate and adaptive immunity by using dendritic cell-intrinsic and -extrinsic mechanisms.	7	28	3.07e-11	ENSGALP00000011319,ENSGALP00000015286,ENSGALP00000035830,ENSGALP00000038134,ENSGALP00000041692,ENSGALP00000042597,ENSGALP00000043092	MYD88,TLR2-2,TLR3,TLR4,TLR5,TLR7,VAV1
PMID:27498604	(2016) Cytokine decoy and scavenger receptors as key regulators of immunity and inflammation.	7	28	3.07e-11	ENSGALP00000011319,ENSGALP00000012873,ENSGALP00000024180,ENSGALP00000035830,ENSGALP00000038134,ENSGALP00000042597,ENSGALP00000043092	FYN,MYD88,TLR2-2,TLR3,TLR4,TLR7,TRAF6
PMID:18241342	(2008) Evolution of the chicken Toll-like receptor gene family: a story of gene gain and gene loss.	6	11	3.84e-11	ENSGALP00000011319,ENSGALP00000013260,ENSGALP00000015286,ENSGALP00000035830,ENSGALP00000038134,ENSGALP00000043092	TLR15,TLR2-2,TLR3,TLR4,TLR5,TLR7
PMID:21052677	(2011) Human and chicken TLR pathways: manual curation and computer-based orthology analysis.	6	11	3.84e-11	ENSGALP00000012873,ENSGALP00000013260,ENSGALP00000035830,ENSGALP00000038134,ENSGALP00000042597,ENSGALP00000043092	MYD88,TLR15,TLR2-2,TLR3,TLR7,TRAF6
PMID:27216145	(2016) Ectodomain Architecture Affects Sequence and Functional Evolution of Vertebrate Toll-like Receptors.	6	11	3.84e-11	ENSGALP00000011319,ENSGALP00000013260,ENSGALP00000015286,ENSGALP00000035830,ENSGALP00000038134,ENSGALP00000043092	TLR15,TLR2-2,TLR3,TLR4,TLR5,TLR7
PMID:19543380	(2009) Innate immune sensing of modified vaccinia virus Ankara (MVA) is mediated by TLR2-TLR6, MDA-5 and the NALP3 inflammasome.	7	30	4.07e-11	ENSGALP00000011319,ENSGALP00000015286,ENSGALP00000035830,ENSGALP00000035870,ENSGALP00000038134,ENSGALP00000042597,ENSGALP00000043092	IL7,MYD88,TLR2-2,TLR3,TLR4,TLR5,TLR7
PMID:21977329	(2011) Toll-like receptors and myocardial inflammation.	7	30	4.07e-11	ENSGALP00000011319,ENSGALP00000012873,ENSGALP00000015286,ENSGALP00000035830,ENSGALP00000038134,ENSGALP00000042597,ENSGALP00000043092	MYD88,TLR2-2,TLR3,TLR4,TLR5,TLR7,TRAF6
PMID:22423970	(2012) Cofactors required for TLR7- and TLR9-dependent innate immune responses.	7	30	4.07e-11	ENSGALP00000011319,ENSGALP00000012873,ENSGALP00000015286,ENSGALP00000035830,ENSGALP00000038134,ENSGALP00000042597,ENSGALP00000043092	MYD88,TLR2-2,TLR3,TLR4,TLR5,TLR7,TRAF6
PMID:29764680	(2018) The parasite-derived rOv-ASP-1 is an effective antigen-sparing CD4+ T cell-dependent adjuvant for the trivalent inactivated influenza vaccine, and functions in the absence of MyD88 pathway.	7	30	4.07e-11	ENSGALP00000011319,ENSGALP00000012873,ENSGALP00000023991,ENSGALP00000035870,ENSGALP00000038134,ENSGALP00000042597,ENSGALP00000043092	IL7,ITGA2,MYD88,TLR2-2,TLR3,TLR4,TRAF6
PMID:29725321	(2018) Induction of Avian Beta-Defensin 2 Is Possibly Mediated by the p38 MAPK Signal Pathway in Chicken Embryo Fibroblasts After Newcastle Disease Virus Infection.	6	12	4.79e-11	ENSGALP00000011319,ENSGALP00000013260,ENSGALP00000015286,ENSGALP00000035830,ENSGALP00000042597,ENSGALP00000043092	MYD88,TLR15,TLR3,TLR4,TLR5,TLR7
PMID:31800025	(2020) Evolutionary History of the Toll-Like Receptor Gene Family across Vertebrates.	6	12	4.79e-11	ENSGALP00000011319,ENSGALP00000013260,ENSGALP00000015286,ENSGALP00000035830,ENSGALP00000038134,ENSGALP00000043092	TLR15,TLR2-2,TLR3,TLR4,TLR5,TLR7
PMID:29247989	(2018) Tuning inflammation and immunity by the negative regulators IL-1R2 and IL-1R8.	7	33	6.35e-11	ENSGALP00000011319,ENSGALP00000012873,ENSGALP00000024180,ENSGALP00000027049,ENSGALP00000035830,ENSGALP00000042597,ENSGALP00000043092	FYN,IL1R1,MYD88,TLR3,TLR4,TLR7,TRAF6
PMID:21323627	(2011) Toll-like receptors (TLRs) and mannan-binding lectin (MBL): on constant alert in a hostile environment.	6	13	6.53e-11	ENSGALP00000011319,ENSGALP00000015286,ENSGALP00000035830,ENSGALP00000038134,ENSGALP00000042597,ENSGALP00000043092	MYD88,TLR2-2,TLR3,TLR4,TLR5,TLR7
PMID:26634454	(2015) Molecular cloning of Peking duck Toll-like receptor 3 (duTLR3) gene and its responses to reovirus infection.	6	13	6.53e-11	ENSGALP00000011319,ENSGALP00000013260,ENSGALP00000015286,ENSGALP00000035830,ENSGALP00000038134,ENSGALP00000043092	TLR15,TLR2-2,TLR3,TLR4,TLR5,TLR7
PMID:23436515	(2013) Differential expression of Toll-like receptor genes in lymphoid tissues between Marek's disease virus-infected and noninfected chickens.	6	14	8.91e-11	ENSGALP00000012873,ENSGALP00000013260,ENSGALP00000015286,ENSGALP00000035830,ENSGALP00000042597,ENSGALP00000043092	MYD88,TLR15,TLR3,TLR5,TLR7,TRAF6
PMID:24362933	(2014) Host-cell sensors for Plasmodium activate innate immunity against liver-stage infection.	6	14	8.91e-11	ENSGALP00000011319,ENSGALP00000015286,ENSGALP00000035830,ENSGALP00000038134,ENSGALP00000042597,ENSGALP00000043092	MYD88,TLR2-2,TLR3,TLR4,TLR5,TLR7
PMID:24624130	(2014) TLR Agonists as Modulators of the Innate Immune Response and Their Potential as Agents Against Infectious Disease.	6	14	8.91e-11	ENSGALP00000011319,ENSGALP00000015286,ENSGALP00000035830,ENSGALP00000038134,ENSGALP00000042597,ENSGALP00000043092	MYD88,TLR2-2,TLR3,TLR4,TLR5,TLR7
PMID:31973199	(2020) The Control of Intestinal Inflammation: A Major Objective in the Research of Probiotic Strains as Alternatives to Antibiotic Growth Promoters in Poultry.	7	36	9.62e-11	ENSGALP00000011319,ENSGALP00000013260,ENSGALP00000015286,ENSGALP00000035830,ENSGALP00000038134,ENSGALP00000042597,ENSGALP00000043092	MYD88,TLR15,TLR2-2,TLR3,TLR4,TLR5,TLR7
PMID:24427759	(2014) New vaccines against influenza virus.	6	15	1.15e-10	ENSGALP00000011319,ENSGALP00000015286,ENSGALP00000035830,ENSGALP00000038134,ENSGALP00000042597,ENSGALP00000043092	MYD88,TLR2-2,TLR3,TLR4,TLR5,TLR7
PMID:30564215	(2018) Bacteria-Host Interactions in Multiple Sclerosis.	6	16	1.55e-10	ENSGALP00000011319,ENSGALP00000015286,ENSGALP00000035830,ENSGALP00000038134,ENSGALP00000042597,ENSGALP00000043092	MYD88,TLR2-2,TLR3,TLR4,TLR5,TLR7
PMID:24134665	(2013) Diacylated lipopeptide from Mycoplasma synoviae mediates TLR15 induced innate immune responses.	6	17	2.05e-10	ENSGALP00000011319,ENSGALP00000013260,ENSGALP00000015286,ENSGALP00000035830,ENSGALP00000038134,ENSGALP00000043092	TLR15,TLR2-2,TLR3,TLR4,TLR5,TLR7
PMID:25401327	(2014) Mycoplasma gallisepticum lipid associated membrane proteins up-regulate inflammatory genes in chicken tracheal epithelial cells via TLR-2 ligation through an NF-KB dependent pathway.	6	17	2.05e-10	ENSGALP00000011319,ENSGALP00000012873,ENSGALP00000013260,ENSGALP00000035870,ENSGALP00000038134,ENSGALP00000042597	IL7,MYD88,TLR15,TLR2-2,TLR4,TRAF6
PMID:25759845	(2015) Insights into the antiviral immunity against grass carp (Ctenopharyngodon idella) reovirus (GCRV) in grass carp.	7	41	2.05e-10	ENSGALP00000011319,ENSGALP00000012873,ENSGALP00000015286,ENSGALP00000035830,ENSGALP00000038134,ENSGALP00000042597,ENSGALP00000043092	MYD88,TLR2-2,TLR3,TLR4,TLR5,TLR7,TRAF6
PMID:27876864	(2016) Identification of an infectious bronchitis coronavirus strain exhibiting a classical genotype but altered antigenicity, pathogenicity, and innate immunity profile.	6	17	2.05e-10	ENSGALP00000011319,ENSGALP00000013260,ENSGALP00000035830,ENSGALP00000038134,ENSGALP00000042597,ENSGALP00000043092	MYD88,TLR15,TLR2-2,TLR3,TLR4,TLR7
PMID:28018321	(2016) CpG Oligodeoxynucleotides Induce Differential Cytokine and Chemokine Gene Expression Profiles in Dapulian and Landrace Pigs.	6	17	2.05e-10	ENSGALP00000011319,ENSGALP00000015286,ENSGALP00000035830,ENSGALP00000038134,ENSGALP00000042597,ENSGALP00000043092	MYD88,TLR2-2,TLR3,TLR4,TLR5,TLR7
PMID:29570670	(2018) Oxymatrine Inhibits Influenza A Virus Replication and Inflammation via TLR4, p38 MAPK and NF-KB Pathways.	6	18	2.5e-10	ENSGALP00000011319,ENSGALP00000012873,ENSGALP00000035830,ENSGALP00000038134,ENSGALP00000042597,ENSGALP00000043092	MYD88,TLR2-2,TLR3,TLR4,TLR7,TRAF6
PMID:31998655	(2019) Dynamics and Outcome of Macrophage Interaction Between Salmonella Gallinarum, Salmonella Typhimurium, and Salmonella Dublin and Macrophages From Chicken and Cattle.	6	18	2.5e-10	ENSGALP00000011319,ENSGALP00000013260,ENSGALP00000015286,ENSGALP00000035830,ENSGALP00000038134,ENSGALP00000043092	TLR15,TLR2-2,TLR3,TLR4,TLR5,TLR7
PMID:30239962	(2019) Characterization of intestinal immune response to Clostridium perfringens infection in broiler chickens.	6	19	3.17e-10	ENSGALP00000011319,ENSGALP00000013260,ENSGALP00000015286,ENSGALP00000035830,ENSGALP00000038134,ENSGALP00000043092	TLR15,TLR2-2,TLR3,TLR4,TLR5,TLR7
PMID:28197148	(2017) Avian Interferons and Their Antiviral Effectors.	7	46	3.73e-10	ENSGALP00000011319,ENSGALP00000013260,ENSGALP00000015286,ENSGALP00000035830,ENSGALP00000038134,ENSGALP00000042597,ENSGALP00000043092	MYD88,TLR15,TLR2-2,TLR3,TLR4,TLR5,TLR7
PMID:21592354	(2011) Induction of inflammatory cytokines and Toll-like receptors in chickens infected with avian H9N2 influenza virus.	6	20	3.98e-10	ENSGALP00000011319,ENSGALP00000013260,ENSGALP00000015286,ENSGALP00000035830,ENSGALP00000038134,ENSGALP00000043092	TLR15,TLR2-2,TLR3,TLR4,TLR5,TLR7
PMID:32065987	(2020) Effect of TLR agonist on infections bronchitis virus replication and cytokine expression in embryonated chicken eggs.	6	20	3.98e-10	ENSGALP00000011319,ENSGALP00000013260,ENSGALP00000015286,ENSGALP00000035830,ENSGALP00000038134,ENSGALP00000043092	TLR15,TLR2-2,TLR3,TLR4,TLR5,TLR7
PMID:25078919	(2015) Innate immune sensing and response to influenza.	7	47	4.08e-10	ENSGALP00000011319,ENSGALP00000012873,ENSGALP00000015286,ENSGALP00000035830,ENSGALP00000038134,ENSGALP00000042597,ENSGALP00000043092	MYD88,TLR2-2,TLR3,TLR4,TLR5,TLR7,TRAF6
PMID:19812695	(2009) Nanoparticle-delivered multimeric soluble CD40L DNA combined with Toll-Like Receptor agonists as a treatment for melanoma.	6	21	4.88e-10	ENSGALP00000011319,ENSGALP00000015286,ENSGALP00000035830,ENSGALP00000038134,ENSGALP00000042597,ENSGALP00000043092	MYD88,TLR2-2,TLR3,TLR4,TLR5,TLR7
PMID:25384124	(2015) Development of non-traumatic osteonecrosis of the femoral head requires toll-like receptor 7 and 9 stimulations and is boosted by repression on nuclear factor kappa B in rats.	5	6	5.16e-10	ENSGALP00000011319,ENSGALP00000035830,ENSGALP00000038134,ENSGALP00000042597,ENSGALP00000043092	MYD88,TLR2-2,TLR3,TLR4,TLR7
PMID:23934186	(2014) The Yin and Yang of Toll-like receptors in cancer.	6	22	6.02e-10	ENSGALP00000011319,ENSGALP00000015286,ENSGALP00000035830,ENSGALP00000038134,ENSGALP00000042597,ENSGALP00000043092	MYD88,TLR2-2,TLR3,TLR4,TLR5,TLR7
PMID:31426357	(2019) The Innate Antiviral Response in Animals: An Evolutionary Perspective from Flagellates to Humans.	6	23	7.47e-10	ENSGALP00000011319,ENSGALP00000012873,ENSGALP00000035830,ENSGALP00000038134,ENSGALP00000042597,ENSGALP00000043092	MYD88,TLR2-2,TLR3,TLR4,TLR7,TRAF6
PMID:30656066	(2019) Application of built-in adjuvants for epitope-based vaccines.	6	24	9.19e-10	ENSGALP00000011319,ENSGALP00000015286,ENSGALP00000035830,ENSGALP00000038134,ENSGALP00000042597,ENSGALP00000043092	MYD88,TLR2-2,TLR3,TLR4,TLR5,TLR7
PMID:22740790	(2012) The Roles and Perspectives of Toll-Like Receptors and CD4(+) Helper T Cell Subsets in Acute Viral Encephalitis.	6	25	1.12e-09	ENSGALP00000011319,ENSGALP00000015286,ENSGALP00000035830,ENSGALP00000038134,ENSGALP00000042597,ENSGALP00000043092	MYD88,TLR2-2,TLR3,TLR4,TLR5,TLR7
PMID:27449021	(2016) Avian Tembusu virus infection effectively triggers host innate immune response through MDA5 and TLR3-dependent signaling pathways.	6	25	1.12e-09	ENSGALP00000011319,ENSGALP00000013260,ENSGALP00000015286,ENSGALP00000035830,ENSGALP00000038134,ENSGALP00000043092	TLR15,TLR2-2,TLR3,TLR4,TLR5,TLR7
PMID:30798988	(2019) Activating the Nucleic Acid-Sensing Machinery for Anticancer Immunity.	6	25	1.12e-09	ENSGALP00000011319,ENSGALP00000012873,ENSGALP00000035830,ENSGALP00000038134,ENSGALP00000042597,ENSGALP00000043092	MYD88,TLR2-2,TLR3,TLR4,TLR7,TRAF6
PMID:17316136	(2007) Chicken toll-like receptor 3 recognizes its cognate ligand when ectopically expressed in human cells.	5	8	1.3e-09	ENSGALP00000011319,ENSGALP00000015286,ENSGALP00000035830,ENSGALP00000038134,ENSGALP00000043092	TLR2-2,TLR3,TLR4,TLR5,TLR7
PMID:20370617	(2010) Toll-like receptors and B-cell receptors synergize to induce immunoglobulin class-switch DNA recombination: relevance to microbial antibody responses.	6	26	1.3e-09	ENSGALP00000011319,ENSGALP00000015286,ENSGALP00000035830,ENSGALP00000038134,ENSGALP00000042597,ENSGALP00000043092	MYD88,TLR2-2,TLR3,TLR4,TLR5,TLR7
PMID:22185391	(2011) Signatures of positive selection in Toll-like receptor (TLR) genes in mammals.	5	8	1.3e-09	ENSGALP00000011319,ENSGALP00000015286,ENSGALP00000035830,ENSGALP00000042597,ENSGALP00000043092	MYD88,TLR3,TLR4,TLR5,TLR7
PMID:23346377	(2012) Recombinant influenza vaccines.	5	8	1.3e-09	ENSGALP00000011319,ENSGALP00000015286,ENSGALP00000035830,ENSGALP00000038134,ENSGALP00000043092	TLR2-2,TLR3,TLR4,TLR5,TLR7
PMID:23405063	(2013) Litopenaeus vannamei sterile-alpha and armadillo motif containing protein (LvSARM) is involved in regulation of Penaeidins and antilipopolysaccharide factors.	5	8	1.3e-09	ENSGALP00000011319,ENSGALP00000012873,ENSGALP00000038134,ENSGALP00000042597,ENSGALP00000043092	MYD88,TLR2-2,TLR3,TLR4,TRAF6
PMID:23947360	(2013) Immunity to viruses: learning from successful human vaccines.	6	26	1.3e-09	ENSGALP00000011319,ENSGALP00000015286,ENSGALP00000035830,ENSGALP00000038134,ENSGALP00000042597,ENSGALP00000043092	MYD88,TLR2-2,TLR3,TLR4,TLR5,TLR7
PMID:23965413	(2013) An evolving new paradigm: endothelial cells--conditional innate immune cells.	6	26	1.3e-09	ENSGALP00000011319,ENSGALP00000035830,ENSGALP00000035870,ENSGALP00000038134,ENSGALP00000042597,ENSGALP00000043092	IL7,MYD88,TLR2-2,TLR3,TLR4,TLR7
PMID:24706267	(2014) Toll-like receptors gene expression in the gastrointestinal tract of Salmonella serovar Pullorum-infected broiler chicken.	5	8	1.3e-09	ENSGALP00000011319,ENSGALP00000013260,ENSGALP00000015286,ENSGALP00000038134,ENSGALP00000043092	TLR15,TLR2-2,TLR3,TLR4,TLR5
PMID:29888293	(2018) Toll-Like Receptors and RIG-I-Like Receptors Play Important Roles in Resisting Flavivirus.	6	26	1.3e-09	ENSGALP00000011319,ENSGALP00000012873,ENSGALP00000035830,ENSGALP00000038134,ENSGALP00000042597,ENSGALP00000043092	MYD88,TLR2-2,TLR3,TLR4,TLR7,TRAF6
PMID:29893911	(2018) Toll-like receptor evolution in birds: gene duplication, pseudogenisation and diversifying selection.	5	8	1.3e-09	ENSGALP00000011319,ENSGALP00000013260,ENSGALP00000015286,ENSGALP00000038134,ENSGALP00000043092	TLR15,TLR2-2,TLR3,TLR4,TLR5
PMID:30418797	(2018) Gender-specific associations between polymorphisms in the Toll-like receptor (TLR) genes and lung function among workers in swine operations.	5	8	1.3e-09	ENSGALP00000011319,ENSGALP00000015286,ENSGALP00000035830,ENSGALP00000038134,ENSGALP00000043092	TLR2-2,TLR3,TLR4,TLR5,TLR7
PMID:26697438	(2015) West Nile Virus Challenge Alters the Transcription Profiles of Innate Immune Genes in Rabbit Peripheral Blood Mononuclear Cells.	6	27	1.4e-09	ENSGALP00000011319,ENSGALP00000015286,ENSGALP00000035830,ENSGALP00000038134,ENSGALP00000042597,ENSGALP00000043092	MYD88,TLR2-2,TLR3,TLR4,TLR5,TLR7
PMID:26369556	(2015) Avian pathogenic Escherichia coli (APEC) infection alters bone marrow transcriptome in chickens.	7	61	1.65e-09	ENSGALP00000008911,ENSGALP00000011319,ENSGALP00000012873,ENSGALP00000024180,ENSGALP00000035870,ENSGALP00000038134,ENSGALP00000041692	BLB2,FYN,IL7,TLR2-2,TLR4,TRAF6,VAV1
PMID:19077284	(2008) Expression and distribution of Toll-like receptors 11-13 in the brain during murine neurocysticercosis.	5	9	1.66e-09	ENSGALP00000011319,ENSGALP00000015286,ENSGALP00000035830,ENSGALP00000038134,ENSGALP00000043092	TLR2-2,TLR3,TLR4,TLR5,TLR7
PMID:26323406	(2015) RNA-seq Profiles of Immune Related Genes in the Spleen of Necrotic Enteritis-afflicted Chicken Lines.	8	111	1.66e-09	ENSGALP00000011319,ENSGALP00000013260,ENSGALP00000015286,ENSGALP00000027049,ENSGALP00000035830,ENSGALP00000035870,ENSGALP00000038134,ENSGALP00000043092	IL1R1,IL7,TLR15,TLR2-2,TLR3,TLR4,TLR5,TLR7
PMID:27757109	(2016) Infection of Goose with Genotype VIId Newcastle Disease Virus of Goose Origin Elicits Strong Immune Responses at Early Stage.	6	28	1.66e-09	ENSGALP00000011319,ENSGALP00000013260,ENSGALP00000015286,ENSGALP00000035830,ENSGALP00000038134,ENSGALP00000043092	TLR15,TLR2-2,TLR3,TLR4,TLR5,TLR7
PMID:27827442	(2016) Lack of diversity at innate immunity Toll-like receptor genes in the Critically Endangered White-winged Flufftail (Sarothrura ayresi).	5	9	1.66e-09	ENSGALP00000011319,ENSGALP00000013260,ENSGALP00000015286,ENSGALP00000035830,ENSGALP00000043092	TLR15,TLR3,TLR4,TLR5,TLR7
PMID:29724212	(2018) Molecular characterization and expression patterns of a non-mammalian toll-like receptor gene (TLR21) in larvae ontogeny of common carp (Cyprinus carpio L.) and upon immune stimulation.	5	9	1.66e-09	ENSGALP00000011319,ENSGALP00000015286,ENSGALP00000038134,ENSGALP00000042597,ENSGALP00000043092	MYD88,TLR2-2,TLR3,TLR4,TLR5
PMID:29849060	(2018) Signatures of balancing selection in toll-like receptor (TLRs) genes - novel insights from a free-living rodent.	5	9	1.66e-09	ENSGALP00000011319,ENSGALP00000015286,ENSGALP00000035830,ENSGALP00000038134,ENSGALP00000043092	TLR2-2,TLR3,TLR4,TLR5,TLR7
PMID:31139186	(2019) The Interaction Between Two Worlds: MicroRNAs and Toll-Like Receptors.	6	28	1.66e-09	ENSGALP00000011319,ENSGALP00000012873,ENSGALP00000015286,ENSGALP00000035830,ENSGALP00000038134,ENSGALP00000043092	TLR2-2,TLR3,TLR4,TLR5,TLR7,TRAF6
PMID:25347003	(2014) Neisseria meningitidis elicits a pro-inflammatory response involving IKBZeta in a human blood-cerebrospinal fluid barrier model.	6	29	1.85e-09	ENSGALP00000011319,ENSGALP00000015286,ENSGALP00000035830,ENSGALP00000038134,ENSGALP00000042597,ENSGALP00000043092	MYD88,TLR2-2,TLR3,TLR4,TLR5,TLR7
PMID:25723398	(2015) De Novo assembly of the Japanese flounder (Paralichthys olivaceus) spleen transcriptome to identify putative genes involved in immunity.	7	63	1.85e-09	ENSGALP00000011319,ENSGALP00000012873,ENSGALP00000015286,ENSGALP00000036433,ENSGALP00000038134,ENSGALP00000042597,ENSGALP00000043092	F13A1,MYD88,TLR2-2,TLR3,TLR4,TLR5,TRAF6
PMID:21901304	(2011) Innate immunity and the role of defensins in otitis media.	5	10	2.32e-09	ENSGALP00000011319,ENSGALP00000012873,ENSGALP00000038134,ENSGALP00000042597,ENSGALP00000043092	MYD88,TLR2-2,TLR3,TLR4,TRAF6
PMID:22500832	(2012) Contribution of Toll-like receptor signaling to germinal center antibody responses.	5	10	2.32e-09	ENSGALP00000011319,ENSGALP00000015286,ENSGALP00000024180,ENSGALP00000035830,ENSGALP00000042597	FYN,MYD88,TLR4,TLR5,TLR7
PMID:25269719	(2015) Cloning, expression and functional analysis of the duck Toll-like receptor 5 (TLR5) gene.	5	10	2.32e-09	ENSGALP00000011319,ENSGALP00000012873,ENSGALP00000038134,ENSGALP00000042597,ENSGALP00000043092	MYD88,TLR2-2,TLR3,TLR4,TRAF6
PMID:26509790	(2015) Drift, not selection, shapes toll-like receptor variation among oceanic island populations.	5	10	2.32e-09	ENSGALP00000011319,ENSGALP00000013260,ENSGALP00000015286,ENSGALP00000038134,ENSGALP00000043092	TLR15,TLR2-2,TLR3,TLR4,TLR5
PMID:28209121	(2017) Evolution of toll-like receptors in the context of terrestrial ungulates and cetaceans diversification.	5	10	2.32e-09	ENSGALP00000011319,ENSGALP00000013260,ENSGALP00000015286,ENSGALP00000035830,ENSGALP00000038134	TLR15,TLR2-2,TLR4,TLR5,TLR7
PMID:23671700	(2013) Analysis of antiviral response in human epithelial cells infected with hepatitis E virus.	6	31	2.46e-09	ENSGALP00000011319,ENSGALP00000012873,ENSGALP00000035830,ENSGALP00000038134,ENSGALP00000042597,ENSGALP00000043092	MYD88,TLR2-2,TLR3,TLR4,TLR7,TRAF6
PMID:26893019	(2016) Late regulation of immune genes and microRNAs in circulating leukocytes in a pig model of influenza A (H1N2) infection.	6	31	2.46e-09	ENSGALP00000011319,ENSGALP00000012873,ENSGALP00000035830,ENSGALP00000038134,ENSGALP00000042597,ENSGALP00000043092	MYD88,TLR2-2,TLR3,TLR4,TLR7,TRAF6
PMID:19668221	(2009) TANK is a negative regulator of Toll-like receptor signaling and is critical for the prevention of autoimmune nephritis.	6	32	2.86e-09	ENSGALP00000011319,ENSGALP00000012873,ENSGALP00000035830,ENSGALP00000038134,ENSGALP00000042597,ENSGALP00000043092	MYD88,TLR2-2,TLR3,TLR4,TLR7,TRAF6
PMID:22421786	(2012) Integration of B cell responses through Toll-like receptors and antigen receptors.	6	32	2.86e-09	ENSGALP00000011319,ENSGALP00000012873,ENSGALP00000035830,ENSGALP00000038134,ENSGALP00000042597,ENSGALP00000043092	MYD88,TLR2-2,TLR3,TLR4,TLR7,TRAF6
PMID:15936435	(2005) Expression and function of Toll-like receptors in chicken heterophils.	5	11	3.08e-09	ENSGALP00000011319,ENSGALP00000015286,ENSGALP00000035830,ENSGALP00000038134,ENSGALP00000043092	TLR2-2,TLR3,TLR4,TLR5,TLR7
PMID:21162649	(2011) Protection against or triggering of Type 1 diabetes? Different roles for viral infections.	5	11	3.08e-09	ENSGALP00000011319,ENSGALP00000015286,ENSGALP00000035830,ENSGALP00000038134,ENSGALP00000043092	TLR2-2,TLR3,TLR4,TLR5,TLR7
PMID:27956772	(2016) Biocomputational analysis of evolutionary relationship between toll-like receptor and nucleotide-binding oligomerization domain-like receptors genes.	5	11	3.08e-09	ENSGALP00000011319,ENSGALP00000015286,ENSGALP00000035830,ENSGALP00000042597,ENSGALP00000043092	MYD88,TLR3,TLR4,TLR5,TLR7
PMID:28373203	(2017) Three-tier regulation of cell number plasticity by neurotrophins and Tolls in Drosophila.	5	11	3.08e-09	ENSGALP00000011319,ENSGALP00000015286,ENSGALP00000038134,ENSGALP00000042597,ENSGALP00000043092	MYD88,TLR2-2,TLR3,TLR4,TLR5
PMID:30450099	(2018) Characterization of the TLR Family in Branchiostoma lanceolatum and Discovery of a Novel TLR22-Like Involved in dsRNA Recognition in Amphioxus.	5	11	3.08e-09	ENSGALP00000011319,ENSGALP00000015286,ENSGALP00000035830,ENSGALP00000038134,ENSGALP00000043092	TLR2-2,TLR3,TLR4,TLR5,TLR7
PMID:23942912	(2014) Comprehensive transcriptome profiling and functional analysis of the frog (Bombina maxima) immune system.	6	33	3.16e-09	ENSGALP00000011319,ENSGALP00000035830,ENSGALP00000035870,ENSGALP00000038134,ENSGALP00000042597,ENSGALP00000043092	IL7,MYD88,TLR2-2,TLR3,TLR4,TLR7
PMID:19104650	(2008) Leishmania-induced IRAK-1 inactivation is mediated by SHP-1 interacting with an evolutionarily conserved KTIM motif.	5	12	4.11e-09	ENSGALP00000011319,ENSGALP00000012873,ENSGALP00000038134,ENSGALP00000042597,ENSGALP00000043092	MYD88,TLR2-2,TLR3,TLR4,TRAF6
PMID:21753151	(2011) Requirement of UNC93B1 reveals a critical role for TLR7 in host resistance to primary infection with Trypanosoma cruzi.	5	12	4.11e-09	ENSGALP00000011319,ENSGALP00000035830,ENSGALP00000038134,ENSGALP00000042597,ENSGALP00000043092	MYD88,TLR2-2,TLR3,TLR4,TLR7
PMID:23166766	(2012) Molecular evolution and structural features of IRAK family members.	5	12	4.11e-09	ENSGALP00000011319,ENSGALP00000012873,ENSGALP00000038134,ENSGALP00000042597,ENSGALP00000043092	MYD88,TLR2-2,TLR3,TLR4,TRAF6
PMID:29431215	(2018) Human eosinophils and mast cells: Birds of a feather flock together.	6	35	4.19e-09	ENSGALP00000011319,ENSGALP00000015286,ENSGALP00000027049,ENSGALP00000038134,ENSGALP00000042597,ENSGALP00000043092	IL1R1,MYD88,TLR2-2,TLR3,TLR4,TLR5
PMID:17137812	(2007) Pattern recognition receptors in companion and farm animals - the key to unlocking the door to animal disease?	5	13	5.49e-09	ENSGALP00000011319,ENSGALP00000013260,ENSGALP00000038134,ENSGALP00000042597,ENSGALP00000043092	MYD88,TLR15,TLR2-2,TLR3,TLR4
PMID:18039950	(2007) B cell intrinsic TLR signals amplify but are not required for humoral immunity.	5	13	5.49e-09	ENSGALP00000011319,ENSGALP00000012873,ENSGALP00000038134,ENSGALP00000042597,ENSGALP00000043092	MYD88,TLR2-2,TLR3,TLR4,TRAF6
PMID:20628601	(2010) Systemic Toll-like receptor stimulation suppresses experimental allergic asthma and autoimmune diabetes in NOD mice.	5	13	5.49e-09	ENSGALP00000011319,ENSGALP00000035830,ENSGALP00000038134,ENSGALP00000042597,ENSGALP00000043092	MYD88,TLR2-2,TLR3,TLR4,TLR7
PMID:25057505	(2014) Targeting TLR2 for vaccine development.	6	37	5.49e-09	ENSGALP00000011319,ENSGALP00000013260,ENSGALP00000035830,ENSGALP00000038134,ENSGALP00000042597,ENSGALP00000043092	MYD88,TLR15,TLR2-2,TLR3,TLR4,TLR7
PMID:21248340	(2011) Expression of Toll-like receptors and avian beta-defensins and their changes in response to bacterial components in chicken sperm.	5	14	7.19e-09	ENSGALP00000011319,ENSGALP00000013260,ENSGALP00000015286,ENSGALP00000035830,ENSGALP00000038134	TLR15,TLR2-2,TLR4,TLR5,TLR7
PMID:24038094	(2014) Saccharomyces boulardii and Bacillus subtilis B10 modulate TLRs mediated signaling to induce immunity by chicken BMDCs.	5	14	7.19e-09	ENSGALP00000011319,ENSGALP00000012873,ENSGALP00000013260,ENSGALP00000038134,ENSGALP00000042597	MYD88,TLR15,TLR2-2,TLR4,TRAF6
PMID:28319123	(2017) Saccharomyces boulardii and Bacillus subtilis B10 modulate TLRs and cytokines expression patterns in jejunum and ileum of broilers.	5	14	7.19e-09	ENSGALP00000011319,ENSGALP00000012873,ENSGALP00000013260,ENSGALP00000038134,ENSGALP00000042597	MYD88,TLR15,TLR2-2,TLR4,TRAF6
PMID:32055188	(2018) Effects of TLR Ligands on the Expression of Cytokines and Possible Role of NFkappaB in its Process in the Theca of Chicken Follicles.	5	14	7.19e-09	ENSGALP00000011319,ENSGALP00000015286,ENSGALP00000035830,ENSGALP00000038134,ENSGALP00000043092	TLR2-2,TLR3,TLR4,TLR5,TLR7
PMID:21569241	(2011) Regulation of toll-like receptor 1 and -2 in neonatal mice brains after hypoxia-ischemia.	5	15	9.26e-09	ENSGALP00000011319,ENSGALP00000015286,ENSGALP00000035830,ENSGALP00000038134,ENSGALP00000043092	TLR2-2,TLR3,TLR4,TLR5,TLR7
PMID:23273344	(2012) Diversification of the expanded teleost-specific toll-like receptor family in Atlantic cod, Gadus morhua.	5	15	9.26e-09	ENSGALP00000011319,ENSGALP00000013260,ENSGALP00000015286,ENSGALP00000035830,ENSGALP00000038134	TLR15,TLR2-2,TLR4,TLR5,TLR7
PMID:26956584	(2016) Toll-Like Receptor 3TRIF-Dependent IL-12p70 Secretion Mediated by Streptococcus pneumoniae RNA and Its Priming by Influenza A Virus Coinfection in Human Dendritic Cells.	5	15	9.26e-09	ENSGALP00000011319,ENSGALP00000035830,ENSGALP00000038134,ENSGALP00000042597,ENSGALP00000043092	MYD88,TLR2-2,TLR3,TLR4,TLR7
PMID:29849712	(2018) Effects of Gui Zhi Ma Huang Ge Ban Tang on the TLR7 Pathway in Influenza Virus Infected Mouse Lungs in a Cold Environment.	5	15	9.26e-09	ENSGALP00000011319,ENSGALP00000012873,ENSGALP00000035830,ENSGALP00000042597,ENSGALP00000043092	MYD88,TLR3,TLR4,TLR7,TRAF6
PMID:31226171	(2019) The lectin-specific activity of Toxoplasma gondii microneme proteins 1 and 4 binds Toll-like receptor 2 and 4 N-glycans to regulate innate immune priming.	5	15	9.26e-09	ENSGALP00000011319,ENSGALP00000015286,ENSGALP00000035830,ENSGALP00000042597,ENSGALP00000043092	MYD88,TLR3,TLR4,TLR5,TLR7
PMID:20634939	(2010) Modulation of Toll-like receptor activity by leukocyte Ig-like receptors and their effects during bacterial infection.	5	16	1.17e-08	ENSGALP00000011319,ENSGALP00000035830,ENSGALP00000038134,ENSGALP00000042597,ENSGALP00000043092	MYD88,TLR2-2,TLR3,TLR4,TLR7
PMID:27909057	(2017) Structure of the TollInterleukin-1 Receptor (TIR) Domain of the B-cell Adaptor That Links Phosphoinositide Metabolism with the Negative Regulation of the Toll-like Receptor (TLR) Signalosome.	5	16	1.17e-08	ENSGALP00000011319,ENSGALP00000012873,ENSGALP00000035830,ENSGALP00000042597,ENSGALP00000043092	MYD88,TLR3,TLR4,TLR7,TRAF6
PMID:19882216	(2010) Induction of type I interferon by RNA viruses: cellular receptors and their substrates.	5	17	1.48e-08	ENSGALP00000011319,ENSGALP00000012873,ENSGALP00000035830,ENSGALP00000042597,ENSGALP00000043092	MYD88,TLR3,TLR4,TLR7,TRAF6
PMID:20441547	(2010) Innate immune function of the neisserial porins and the relationship to vaccine adjuvant activity.	5	17	1.48e-08	ENSGALP00000011319,ENSGALP00000015286,ENSGALP00000035830,ENSGALP00000038134,ENSGALP00000043092	TLR2-2,TLR3,TLR4,TLR5,TLR7
PMID:26732323	(2016) Intestinal Alkaline Phosphatase: Potential Roles in Promoting Gut Health in Weanling Piglets and Its Modulation by Feed Additives - A Review.	5	17	1.48e-08	ENSGALP00000011319,ENSGALP00000015286,ENSGALP00000035830,ENSGALP00000038134,ENSGALP00000043092	TLR2-2,TLR3,TLR4,TLR5,TLR7
PMID:28483816	(2017) A Pseudomonas aeruginosa TIR effector mediates immune evasion by targeting UBAP1 and TLR adaptors.	5	17	1.48e-08	ENSGALP00000011319,ENSGALP00000015286,ENSGALP00000035830,ENSGALP00000038134,ENSGALP00000042597	MYD88,TLR2-2,TLR4,TLR5,TLR7
PMID:29093654	(2017) Distinct Effects of Monophosphoryl Lipid A, Oligodeoxynucleotide CpG, and Combination Adjuvants on Modulating Innate and Adaptive Immune Responses to Influenza Vaccination.	5	17	1.48e-08	ENSGALP00000011319,ENSGALP00000035830,ENSGALP00000038134,ENSGALP00000042597,ENSGALP00000043092	MYD88,TLR2-2,TLR3,TLR4,TLR7
PMID:31947624	(2020) DEF Cell-Derived Exosomal miR-148a-5p Promotes DTMUV Replication by Negative Regulating TLR3 Expression.	5	18	1.82e-08	ENSGALP00000011319,ENSGALP00000012873,ENSGALP00000038134,ENSGALP00000042597,ENSGALP00000043092	MYD88,TLR2-2,TLR3,TLR4,TRAF6
PMID:21629653	(2011) Integrated microRNA-mRNA-analysis of human monocyte derived macrophages upon Mycobacterium avium subsp. hominissuis infection.	6	48	1.98e-08	ENSGALP00000011319,ENSGALP00000012130,ENSGALP00000012873,ENSGALP00000027049,ENSGALP00000038134,ENSGALP00000042597	IL1R1,ITGB2,MYD88,TLR2-2,TLR4,TRAF6
PMID:20123960	(2010) Type I IFN controls chikungunya virus via its action on nonhematopoietic cells.	5	19	2.27e-08	ENSGALP00000011319,ENSGALP00000035830,ENSGALP00000038134,ENSGALP00000042597,ENSGALP00000043092	MYD88,TLR2-2,TLR3,TLR4,TLR7
PMID:25074978	(2014) The COP II adaptor protein TMED7 is required to initiate and mediate the delivery of TLR4 to the plasma membrane.	5	19	2.27e-08	ENSGALP00000011319,ENSGALP00000015286,ENSGALP00000038134,ENSGALP00000042597,ENSGALP00000043092	MYD88,TLR2-2,TLR3,TLR4,TLR5
PMID:25118589	(2014) RasGRP3 limits Toll-like receptor-triggered inflammatory response in macrophages by activating Rap1 small GTPase.	5	19	2.27e-08	ENSGALP00000011319,ENSGALP00000016120,ENSGALP00000038134,ENSGALP00000042597,ENSGALP00000043092	MYD88,RAP1B,TLR2-2,TLR3,TLR4
PMID:29285314	(2017) TLR2MyD88 pathway-dependent regulation of dendritic cells by dengue virus promotes antibody-dependent enhancement via Th2-biased immunity.	5	19	2.27e-08	ENSGALP00000011319,ENSGALP00000015286,ENSGALP00000035830,ENSGALP00000042597,ENSGALP00000043092	MYD88,TLR3,TLR4,TLR5,TLR7
PMID:30158925	(2018) Characterization of the Myeloid Cell Populations' Resident in the Porcine Palatine Tonsil.	5	19	2.27e-08	ENSGALP00000011319,ENSGALP00000015286,ENSGALP00000035830,ENSGALP00000038134,ENSGALP00000043092	TLR2-2,TLR3,TLR4,TLR5,TLR7
PMID:30483270	(2018) Evolutionary Regression and Species-Specific Codon Usage of TLR15.	5	19	2.27e-08	ENSGALP00000013260,ENSGALP00000015286,ENSGALP00000035830,ENSGALP00000038134,ENSGALP00000043092	TLR15,TLR2-2,TLR3,TLR5,TLR7
PMID:20668934	(2010) Differential expression of Toll-like receptor mRNA in White Leghorn and indigenous chicken of India.	4	4	2.36e-08	ENSGALP00000011319,ENSGALP00000015286,ENSGALP00000035830,ENSGALP00000043092	TLR3,TLR4,TLR5,TLR7
PMID:28784091	(2017) Characterization of the peripheral blood transcriptome and adaptive evolution of the MHC I and TLR gene families in the wolf (Canis lupus).	4	4	2.36e-08	ENSGALP00000011319,ENSGALP00000015286,ENSGALP00000035830,ENSGALP00000043092	TLR3,TLR4,TLR5,TLR7
PMID:31178872	(2019) Direct Inhibition of IRF-Dependent Transcriptional Regulatory Mechanisms Associated With Disease.	6	51	2.6e-08	ENSGALP00000011319,ENSGALP00000012873,ENSGALP00000035830,ENSGALP00000038134,ENSGALP00000042597,ENSGALP00000043092	MYD88,TLR2-2,TLR3,TLR4,TLR7,TRAF6
PMID:15324458	(2004) Flagellin acting via TLR5 is the major activator of key signaling pathways leading to NF-kappa B and proinflammatory gene program activation in intestinal epithelial cells.	5	20	2.65e-08	ENSGALP00000011319,ENSGALP00000015286,ENSGALP00000038134,ENSGALP00000042597,ENSGALP00000043092	MYD88,TLR2-2,TLR3,TLR4,TLR5
PMID:16461338	(2006) Yellow fever vaccine YF-17D activates multiple dendritic cell subsets via TLR2, 7, 8, and 9 to stimulate polyvalent immunity.	5	20	2.65e-08	ENSGALP00000011319,ENSGALP00000035830,ENSGALP00000038134,ENSGALP00000042597,ENSGALP00000043092	MYD88,TLR2-2,TLR3,TLR4,TLR7
PMID:20456021	(2010) TLR2 activation inhibits embryonic neural progenitor cell proliferation.	5	20	2.65e-08	ENSGALP00000011319,ENSGALP00000015286,ENSGALP00000038134,ENSGALP00000042597,ENSGALP00000043092	MYD88,TLR2-2,TLR3,TLR4,TLR5
PMID:22321107	(2011) Induction and function of IFNBeta during viral and bacterial infection.	5	20	2.65e-08	ENSGALP00000011319,ENSGALP00000035830,ENSGALP00000038134,ENSGALP00000042597,ENSGALP00000043092	MYD88,TLR2-2,TLR3,TLR4,TLR7
PMID:29760708	(2018) Dual TLR29 Recognition of Herpes Simplex Virus Infection Is Required for Recruitment and Activation of Monocytes and NK Cells and Restriction of Viral Dissemination to the Central Nervous System.	5	20	2.65e-08	ENSGALP00000011319,ENSGALP00000012873,ENSGALP00000038134,ENSGALP00000042597,ENSGALP00000043092	MYD88,TLR2-2,TLR3,TLR4,TRAF6
PMID:31379823	(2019) Innovative Mucosal Vaccine Formulations Against Influenza A Virus Infections.	5	20	2.65e-08	ENSGALP00000011319,ENSGALP00000015286,ENSGALP00000035830,ENSGALP00000038134,ENSGALP00000043092	TLR2-2,TLR3,TLR4,TLR5,TLR7
PMID:24168272	(2013) Transcriptome analysis of chicken kidney tissues following coronavirus avian infectious bronchitis virus infection.	6	52	2.77e-08	ENSGALP00000011319,ENSGALP00000013260,ENSGALP00000015286,ENSGALP00000027049,ENSGALP00000042597,ENSGALP00000043092	IL1R1,MYD88,TLR15,TLR3,TLR4,TLR5
PMID:25520716	(2014) Preterm birth, intrauterine infection, and fetal inflammation.	5	21	3.13e-08	ENSGALP00000011319,ENSGALP00000015286,ENSGALP00000035830,ENSGALP00000038134,ENSGALP00000043092	TLR2-2,TLR3,TLR4,TLR5,TLR7
PMID:31264023	(2019) Transcriptome analysis of fowl adenovirus serotype 4 infection in chickens.	6	55	3.73e-08	ENSGALP00000011319,ENSGALP00000015286,ENSGALP00000027049,ENSGALP00000035830,ENSGALP00000038134,ENSGALP00000043092	IL1R1,TLR2-2,TLR3,TLR4,TLR5,TLR7
PMID:22083206	(2012) Suppression of antigen-specific CD4+ T cell activation by SRACD204 through reducing the immunostimulatory capability of antigen-presenting cell.	5	22	3.79e-08	ENSGALP00000011319,ENSGALP00000012873,ENSGALP00000035830,ENSGALP00000038134,ENSGALP00000043092	TLR2-2,TLR3,TLR4,TLR7,TRAF6
PMID:22539991	(2012) An interspecific Nicotiana hybrid as a useful and cost-effective platform for production of animal vaccines.	4	5	3.88e-08	ENSGALP00000011319,ENSGALP00000035830,ENSGALP00000038134,ENSGALP00000043092	TLR2-2,TLR3,TLR4,TLR7
PMID:30071683	(2018) A High-Quality, Long-Read De Novo Genome Assembly to Aid Conservation of Hawaii's Last Remaining Crow Species.	4	5	3.88e-08	ENSGALP00000004924,ENSGALP00000015286,ENSGALP00000035830,ENSGALP00000038134	NCOR2,TLR2-2,TLR5,TLR7
PMID:26972897	(2016) Placental origins of adverse pregnancy outcomes: potential molecular targets: an Executive Workshop Summary of the Eunice Kennedy Shriver National Institute of Child Health and Human Development.	6	57	4.44e-08	ENSGALP00000011319,ENSGALP00000015286,ENSGALP00000035830,ENSGALP00000038134,ENSGALP00000042597,ENSGALP00000043092	MYD88,TLR2-2,TLR3,TLR4,TLR5,TLR7
PMID:21506649	(2011) Carbohydrate-based immune adjuvants.	5	23	4.49e-08	ENSGALP00000011319,ENSGALP00000035830,ENSGALP00000038134,ENSGALP00000042597,ENSGALP00000043092	MYD88,TLR2-2,TLR3,TLR4,TLR7
PMID:22629298	(2012) High-throughput sequence analysis of turbot (Scophthalmus maximus) transcriptome using 454-pyrosequencing for the discovery of antiviral immune genes.	7	111	4.49e-08	ENSGALP00000011319,ENSGALP00000015286,ENSGALP00000024180,ENSGALP00000038134,ENSGALP00000041692,ENSGALP00000042597,ENSGALP00000043092	FYN,MYD88,TLR2-2,TLR3,TLR4,TLR5,VAV1
PMID:23342363	(2012) Innate immunity to H5N1 influenza viruses in humans.	5	23	4.49e-08	ENSGALP00000011319,ENSGALP00000015286,ENSGALP00000035830,ENSGALP00000038134,ENSGALP00000043092	TLR2-2,TLR3,TLR4,TLR5,TLR7
PMID:31607947	(2019) The IRE1Alfa Arm of UPR Regulates Muscle Cells Immune Characters by Restraining p38 MAPK Activation.	5	23	4.49e-08	ENSGALP00000011319,ENSGALP00000035830,ENSGALP00000038134,ENSGALP00000042597,ENSGALP00000043092	MYD88,TLR2-2,TLR3,TLR4,TLR7
PMID:28086922	(2017) Transcriptional profiles in bursal B-lymphoid DT40 cells infected with very virulent infectious bursal disease virus.	6	59	5.22e-08	ENSGALP00000011319,ENSGALP00000013260,ENSGALP00000015286,ENSGALP00000035830,ENSGALP00000038134,ENSGALP00000043092	TLR15,TLR2-2,TLR3,TLR4,TLR5,TLR7
PMID:30223448	(2018) Cathelicidins: Immunomodulatory Antimicrobials.	5	24	5.25e-08	ENSGALP00000011319,ENSGALP00000015286,ENSGALP00000035830,ENSGALP00000038134,ENSGALP00000043092	TLR2-2,TLR3,TLR4,TLR5,TLR7
PMID:18768894	(2008) Unique properties of the chicken TLR4MD-2 complex: selective lipopolysaccharide activation of the MyD88-dependent pathway.	4	6	6.11e-08	ENSGALP00000011319,ENSGALP00000038134,ENSGALP00000042597,ENSGALP00000043092	MYD88,TLR2-2,TLR3,TLR4
PMID:22158560	(2012) Antimicrobial peptides: old molecules with new ideas.	4	6	6.11e-08	ENSGALP00000011319,ENSGALP00000015286,ENSGALP00000035830,ENSGALP00000038134	TLR2-2,TLR4,TLR5,TLR7
PMID:23071706	(2012) Identification and function of myeloid differentiation factor 88 (MyD88) in Litopenaeus vannamei.	4	6	6.11e-08	ENSGALP00000011319,ENSGALP00000012873,ENSGALP00000038134,ENSGALP00000043092	TLR2-2,TLR3,TLR4,TRAF6
PMID:25785268	(2015) Prospects of HA-based universal influenza vaccine.	4	6	6.11e-08	ENSGALP00000011319,ENSGALP00000015286,ENSGALP00000035830,ENSGALP00000043092	TLR3,TLR4,TLR5,TLR7
PMID:23305363	(2012) The role of cysteine proteinases and their inhibitors in the host-pathogen cross talk.	5	26	7.27e-08	ENSGALP00000011319,ENSGALP00000015286,ENSGALP00000035830,ENSGALP00000038134,ENSGALP00000043092	TLR2-2,TLR3,TLR4,TLR5,TLR7
PMID:28987324	(2018) Toll-like receptors and their role in persistent pain.	5	26	7.27e-08	ENSGALP00000011319,ENSGALP00000015286,ENSGALP00000035830,ENSGALP00000038134,ENSGALP00000043092	TLR2-2,TLR3,TLR4,TLR5,TLR7
PMID:29500244	(2018) Anticancer Mechanisms in Two Murine Bone Marrow-Derived Dendritic Cell Subsets Activated with TLR4 Agonists.	5	26	7.27e-08	ENSGALP00000011319,ENSGALP00000015286,ENSGALP00000035830,ENSGALP00000038134,ENSGALP00000043092	TLR2-2,TLR3,TLR4,TLR5,TLR7
PMID:32014819	(2020) A peptide derived from the core beta-sheet region of TIRAP decoys TLR4 and reduces inflammatory and autoimmune symptoms in murine models.	5	27	8.46e-08	ENSGALP00000011319,ENSGALP00000035830,ENSGALP00000038134,ENSGALP00000042597,ENSGALP00000043092	MYD88,TLR2-2,TLR3,TLR4,TLR7
PMID:22945932	(2012) Neutrophil extracellular traps: is immunity the second function of chromatin?	4	7	9.14e-08	ENSGALP00000011319,ENSGALP00000035830,ENSGALP00000037001,ENSGALP00000038134	RAC2,TLR2-2,TLR4,TLR7
PMID:24894132	(2014) Inactivated vaccine with adjuvants consisting of pattern recognition receptor agonists confers protection against avian influenza viruses in chickens.	4	7	9.14e-08	ENSGALP00000011319,ENSGALP00000015286,ENSGALP00000035830,ENSGALP00000043092	TLR3,TLR4,TLR5,TLR7
PMID:29970096	(2018) Computer-aided prediction of antigen presenting cell modulators for designing peptide-based vaccine adjuvants.	4	7	9.14e-08	ENSGALP00000011319,ENSGALP00000015286,ENSGALP00000038134,ENSGALP00000042597	MYD88,TLR2-2,TLR4,TLR5
PMID:26521071	(2016) Hematopoietic stem and multipotent progenitor cells produce IL-17, IL-21 and other cytokines in response to TLR signals associated with late apoptotic products and augment memory Th17 and Tc17 cells in the bone marrow of normal and lupus mice.	5	28	9.73e-08	ENSGALP00000011319,ENSGALP00000035830,ENSGALP00000035870,ENSGALP00000038134,ENSGALP00000043092	IL7,TLR2-2,TLR3,TLR4,TLR7
PMID:21698299	(2011) Novel murine infection models provide deep insights into the 'menage a trois' of Campylobacter jejuni, microbiota and host innate immunity.	4	8	1.32e-07	ENSGALP00000011319,ENSGALP00000015286,ENSGALP00000038134,ENSGALP00000042597	MYD88,TLR2-2,TLR4,TLR5
PMID:24593999	(2014) Adjuvant-carrying synthetic vaccine particles augment the immune response to encapsulated antigen and exhibit strong local immune activation without inducing systemic cytokine release.	4	8	1.32e-07	ENSGALP00000011319,ENSGALP00000023991,ENSGALP00000035830,ENSGALP00000043092	ITGA2,TLR3,TLR4,TLR7
PMID:25463515	(2015) M1 and M2 immune activation in Parkinson's Disease: Foe and ally?	5	30	1.32e-07	ENSGALP00000011319,ENSGALP00000035830,ENSGALP00000038134,ENSGALP00000042597,ENSGALP00000043092	MYD88,TLR2-2,TLR3,TLR4,TLR7
PMID:26624883	(2015) Immortalization of Fetal Bovine Colon Epithelial Cells by Expression of Human Cyclin D1, Mutant Cyclin Dependent Kinase 4, and Telomerase Reverse Transcriptase: An In Vitro Model for Bacterial Infection.	4	8	1.32e-07	ENSGALP00000011319,ENSGALP00000015286,ENSGALP00000038134,ENSGALP00000043092	TLR2-2,TLR3,TLR4,TLR5
PMID:28464901	(2017) chTLR4 pathway activation by Astragalus polysaccharide in bursa of Fabricius.	4	8	1.32e-07	ENSGALP00000011319,ENSGALP00000038134,ENSGALP00000042597,ENSGALP00000043092	MYD88,TLR2-2,TLR3,TLR4
PMID:28955328	(2017) Co-delivery of Dual Toll-Like Receptor Agonists and Antigen in Poly(Lactic-Co-Glycolic) AcidPolyethylenimine Cationic Hybrid Nanoparticles Promote Efficient In Vivo Immune Responses.	4	8	1.32e-07	ENSGALP00000011319,ENSGALP00000035830,ENSGALP00000038134,ENSGALP00000043092	TLR2-2,TLR3,TLR4,TLR7
PMID:29361733	(2018) Verdinexor Targeting of CRM1 is a Promising Therapeutic Approach against RSV and Influenza Viruses.	5	30	1.32e-07	ENSGALP00000011319,ENSGALP00000015286,ENSGALP00000035830,ENSGALP00000038134,ENSGALP00000043092	TLR2-2,TLR3,TLR4,TLR5,TLR7
PMID:29561786	(2018) Histopathological Injuries, Ultrastructural Changes, and Depressed TLR Expression in the Small Intestine of Broiler Chickens with Aflatoxin B1.	4	8	1.32e-07	ENSGALP00000011319,ENSGALP00000035830,ENSGALP00000038134,ENSGALP00000042597	MYD88,TLR2-2,TLR4,TLR7
PMID:32258797	(2020) Potential Role of Macrophage Migration Inhibitory Factor in the Pathogenesis of Marek's Disease.	4	8	1.32e-07	ENSGALP00000011319,ENSGALP00000035830,ENSGALP00000038134,ENSGALP00000043092	TLR2-2,TLR3,TLR4,TLR7
PMID:21419501	(2011) Toll-like receptor signaling in neural plasticity and disease.	5	31	1.46e-07	ENSGALP00000011319,ENSGALP00000015286,ENSGALP00000035830,ENSGALP00000038134,ENSGALP00000043092	TLR2-2,TLR3,TLR4,TLR5,TLR7
PMID:26336837	(2016) The mucolipin-2 (TRPML2) ion channel: a tissue-specific protein crucial to normal cell function.	5	31	1.46e-07	ENSGALP00000011319,ENSGALP00000015286,ENSGALP00000035830,ENSGALP00000038134,ENSGALP00000043092	TLR2-2,TLR3,TLR4,TLR5,TLR7
PMID:25973612	(2015) Transcriptional Profiling of Host Gene Expression in Chicken Embryo Fibroblasts Infected with Reticuloendotheliosis Virus Strain HA1101.	5	32	1.66e-07	ENSGALP00000011319,ENSGALP00000012873,ENSGALP00000038134,ENSGALP00000042597,ENSGALP00000043092	MYD88,TLR2-2,TLR3,TLR4,TRAF6
PMID:19641044	(2009) Toll-like receptor 7-induced immune response to cutaneous West Nile virus infection.	4	9	1.81e-07	ENSGALP00000011319,ENSGALP00000035830,ENSGALP00000038134,ENSGALP00000043092	TLR2-2,TLR3,TLR4,TLR7
PMID:19861156	(2010) Attenuation of the influenza virus sickness behavior in mice deficient in Toll-like receptor 3.	4	9	1.81e-07	ENSGALP00000011319,ENSGALP00000035830,ENSGALP00000038134,ENSGALP00000043092	TLR2-2,TLR3,TLR4,TLR7
PMID:20192812	(2010) Intestinal bacteria and the regulation of immune cell homeostasis.	5	33	1.81e-07	ENSGALP00000011319,ENSGALP00000015286,ENSGALP00000038134,ENSGALP00000042597,ENSGALP00000043092	MYD88,TLR2-2,TLR3,TLR4,TLR5
PMID:21949866	(2011) Comparative analysis of species-specific ligand recognition in Toll-like receptor 8 signaling: a hypothesis.	4	9	1.81e-07	ENSGALP00000011319,ENSGALP00000015286,ENSGALP00000035830,ENSGALP00000038134	TLR2-2,TLR4,TLR5,TLR7
PMID:22312431	(2012) Coronavirus papain-like proteases negatively regulate antiviral innate immune response through disruption of STING-mediated signaling.	4	9	1.81e-07	ENSGALP00000012873,ENSGALP00000035830,ENSGALP00000042597,ENSGALP00000043092	MYD88,TLR3,TLR7,TRAF6
PMID:23101627	(2012) A mouse model of Salmonella typhi infection.	4	9	1.81e-07	ENSGALP00000011319,ENSGALP00000015286,ENSGALP00000038134,ENSGALP00000042597	MYD88,TLR2-2,TLR4,TLR5
PMID:23300459	(2013) IRF-3, IRF-5, and IRF-7 coordinately regulate the type I IFN response in myeloid dendritic cells downstream of MAVS signaling.	5	33	1.81e-07	ENSGALP00000011319,ENSGALP00000012873,ENSGALP00000035830,ENSGALP00000042597,ENSGALP00000043092	MYD88,TLR3,TLR4,TLR7,TRAF6
PMID:25781886	(2015) Polymorphisms of chicken TLR3 and 7 in different breeds.	4	9	1.81e-07	ENSGALP00000035830,ENSGALP00000038134,ENSGALP00000042597,ENSGALP00000043092	MYD88,TLR2-2,TLR3,TLR7
PMID:26450567	(2015) Identification of cellular microRNA-136 as a dual regulator of RIG-I-mediated innate immunity that antagonizes H5N1 IAV replication in A549 cells.	4	9	1.81e-07	ENSGALP00000012873,ENSGALP00000035830,ENSGALP00000042597,ENSGALP00000043092	MYD88,TLR3,TLR7,TRAF6
PMID:27157411	(2016) Vaccine technologies: From whole organisms to rationally designed protein assemblies.	4	9	1.81e-07	ENSGALP00000011319,ENSGALP00000015286,ENSGALP00000035830,ENSGALP00000042597	MYD88,TLR4,TLR5,TLR7
PMID:28212352	(2017) RTA Occupancy of the Origin of Lytic Replication during Murine Gammaherpesvirus 68 Reactivation from B Cell Latency.	4	9	1.81e-07	ENSGALP00000011319,ENSGALP00000012873,ENSGALP00000035830,ENSGALP00000042597	MYD88,TLR4,TLR7,TRAF6
PMID:31971556	(2020) The Genome of the Great Gerbil Reveals Species-Specific Duplication of an MHCII Gene.	4	9	1.81e-07	ENSGALP00000011319,ENSGALP00000015286,ENSGALP00000035830,ENSGALP00000043092	TLR3,TLR4,TLR5,TLR7
PMID:32071389	(2020) Beta amyloid aggregates induce sensitised TLR4 signalling causing long-term potentiation deficit and rat neuronal cell death.	4	9	1.81e-07	ENSGALP00000011319,ENSGALP00000038134,ENSGALP00000042597,ENSGALP00000043092	MYD88,TLR2-2,TLR3,TLR4
PMID:27916934	(2016) Immune-Related Gene Expression Patterns in GPV- or H9N2-Infected Goose Spleens.	5	34	2.04e-07	ENSGALP00000011319,ENSGALP00000015286,ENSGALP00000035830,ENSGALP00000038134,ENSGALP00000043092	TLR2-2,TLR3,TLR4,TLR5,TLR7
PMID:21964925	(2012) Regulation of Toll-like receptor signaling by NDP52-mediated selective autophagy is normally inactivated by A20.	5	35	2.32e-07	ENSGALP00000011319,ENSGALP00000012873,ENSGALP00000035830,ENSGALP00000042597,ENSGALP00000043092	MYD88,TLR3,TLR4,TLR7,TRAF6
PMID:31777004	(2019) Autophagy and the Immune Response.	6	80	2.32e-07	ENSGALP00000011319,ENSGALP00000012873,ENSGALP00000035830,ENSGALP00000038134,ENSGALP00000042597,ENSGALP00000043092	MYD88,TLR2-2,TLR3,TLR4,TLR7,TRAF6
PMID:20692287	(2011) Molecular characterisation of Toll-like receptors in the black flying fox Pteropus alecto.	4	10	2.33e-07	ENSGALP00000011319,ENSGALP00000035830,ENSGALP00000038134,ENSGALP00000043092	TLR2-2,TLR3,TLR4,TLR7
PMID:21687712	(2011) The nucleosome (histone-DNA complex) is the TLR9-specific immunostimulatory component of Plasmodium falciparum that activates DCs.	4	10	2.33e-07	ENSGALP00000011319,ENSGALP00000038134,ENSGALP00000042597,ENSGALP00000043092	MYD88,TLR2-2,TLR3,TLR4
PMID:27455308	(2016) Local Innate Responses to TLR Ligands in the Chicken Trachea.	4	10	2.33e-07	ENSGALP00000011319,ENSGALP00000035830,ENSGALP00000038134,ENSGALP00000043092	TLR2-2,TLR3,TLR4,TLR7
PMID:28620271	(2017) Glutamine Ameliorates Mucosal Damage Caused by Immune Responses to Duck Plague Virus.	4	10	2.33e-07	ENSGALP00000011319,ENSGALP00000012873,ENSGALP00000038134,ENSGALP00000043092	TLR2-2,TLR3,TLR4,TRAF6
PMID:29704894	(2018) Virulent duck enteritis virus infected DEF cells generate a unique pattern of viral microRNAs and a novel set of host microRNAs.	4	10	2.33e-07	ENSGALP00000012873,ENSGALP00000038134,ENSGALP00000042597,ENSGALP00000043092	MYD88,TLR2-2,TLR3,TRAF6
PMID:30151032	(2018) Effects of different principles of Traditional Chinese Medicine treatment on TLR7NF-KB signaling pathway in influenza virus infected mice.	4	10	2.33e-07	ENSGALP00000012873,ENSGALP00000035830,ENSGALP00000042597,ENSGALP00000043092	MYD88,TLR3,TLR7,TRAF6
PMID:18302797	(2008) Expression profiling of circulating non-red blood cells in embryonic blood.	5	37	2.87e-07	ENSGALP00000012130,ENSGALP00000023991,ENSGALP00000024180,ENSGALP00000035830,ENSGALP00000037001	FYN,ITGA2,ITGB2,RAC2,TLR7
PMID:18759927	(2008) Regulation of B-cell entry into the cell cycle.	5	37	2.87e-07	ENSGALP00000011319,ENSGALP00000012873,ENSGALP00000035870,ENSGALP00000041692,ENSGALP00000043092	IL7,TLR3,TLR4,TRAF6,VAV1
PMID:21042920	(2011) Eosinophils in innate immunity: an evolving story.	5	37	2.87e-07	ENSGALP00000011319,ENSGALP00000015286,ENSGALP00000035830,ENSGALP00000038134,ENSGALP00000042597	MYD88,TLR2-2,TLR4,TLR5,TLR7
PMID:25784910	(2015) The Inflammatory Role of Platelets via Their TLRs and Siglec Receptors.	5	37	2.87e-07	ENSGALP00000011319,ENSGALP00000012873,ENSGALP00000035830,ENSGALP00000038134,ENSGALP00000043092	TLR2-2,TLR3,TLR4,TLR7,TRAF6
PMID:27871304	(2016) Respiratory viral infections and host responses; insights from genomics.	5	37	2.87e-07	ENSGALP00000011319,ENSGALP00000035830,ENSGALP00000038134,ENSGALP00000042597,ENSGALP00000043092	MYD88,TLR2-2,TLR3,TLR4,TLR7
PMID:19506737	(2008) Pan-vertebrate toll-like receptors during evolution.	4	11	3.01e-07	ENSGALP00000011319,ENSGALP00000015286,ENSGALP00000038134,ENSGALP00000043092	TLR2-2,TLR3,TLR4,TLR5
PMID:21353603	(2011) Selective utilization of Toll-like receptor and MyD88 signaling in B cells for enhancement of the antiviral germinal center response.	4	11	3.01e-07	ENSGALP00000011319,ENSGALP00000015286,ENSGALP00000035830,ENSGALP00000042597	MYD88,TLR4,TLR5,TLR7
PMID:22691272	(2012) Investigation of the role of endosomal Toll-like receptors in murine collagen-induced arthritis reveals a potential role for TLR7 in disease maintenance.	4	11	3.01e-07	ENSGALP00000011319,ENSGALP00000035830,ENSGALP00000038134,ENSGALP00000043092	TLR2-2,TLR3,TLR4,TLR7
PMID:23326591	(2013) Phylogeny of Toll-like receptor signaling: adapting the innate response.	4	11	3.01e-07	ENSGALP00000011319,ENSGALP00000038134,ENSGALP00000042597,ENSGALP00000043092	MYD88,TLR2-2,TLR3,TLR4
PMID:25750642	(2015) Are Platelets Cells? And if Yes, are They Immune Cells?	4	11	3.01e-07	ENSGALP00000011319,ENSGALP00000035830,ENSGALP00000038134,ENSGALP00000043092	TLR2-2,TLR3,TLR4,TLR7
PMID:25978818	(2015) A Lipopolysaccharide from Pantoea Agglomerans Is a Promising Adjuvant for Sublingual Vaccines to Induce Systemic and Mucosal Immune Responses in Mice via TLR4 Pathway.	4	11	3.01e-07	ENSGALP00000011319,ENSGALP00000035830,ENSGALP00000042597,ENSGALP00000043092	MYD88,TLR3,TLR4,TLR7
PMID:30018186	(2018) Amphibian (Xenopus laevis) Tadpoles and Adult Frogs Differ in Their Use of Expanded Repertoires of Type I and Type III Interferon Cytokines.	4	11	3.01e-07	ENSGALP00000011319,ENSGALP00000035830,ENSGALP00000038134,ENSGALP00000043092	TLR2-2,TLR3,TLR4,TLR7
PMID:30787331	(2019) Intranasal and epicutaneous administration of Toll-like receptor 7 (TLR7) agonists provides protection against influenza A virus-induced morbidity in mice.	4	11	3.01e-07	ENSGALP00000011319,ENSGALP00000035830,ENSGALP00000042597,ENSGALP00000043092	MYD88,TLR3,TLR4,TLR7
PMID:32846975	(2020) Effects of Intermittent Mild Cold Stimulation on mRNA Expression of Immunoglobulins, Cytokines, and Toll-Like Receptors in the Small Intestine of Broilers.	4	11	3.01e-07	ENSGALP00000011319,ENSGALP00000015286,ENSGALP00000035830,ENSGALP00000038134	TLR2-2,TLR4,TLR5,TLR7
PMID:23219158	(2013) SOCS proteins in infectious diseases of mammals.	5	38	3.04e-07	ENSGALP00000011319,ENSGALP00000035870,ENSGALP00000038134,ENSGALP00000042597,ENSGALP00000043092	IL7,MYD88,TLR2-2,TLR3,TLR4
PMID:19945154	(2010) The role of inflammation in regulating platelet production and function: Toll-like receptors in platelets and megakaryocytes.	4	12	3.83e-07	ENSGALP00000012873,ENSGALP00000015286,ENSGALP00000038134,ENSGALP00000042597	MYD88,TLR2-2,TLR5,TRAF6
PMID:22698256	(2012) Inhibition of nitric oxide and inflammatory cytokines in LPS-stimulated murine macrophages by resveratrol, a potent proteasome inhibitor.	4	12	3.83e-07	ENSGALP00000011319,ENSGALP00000038134,ENSGALP00000042597,ENSGALP00000043092	MYD88,TLR2-2,TLR3,TLR4
PMID:25350003	(2014) TLR3 and TLR9 agonists improve postexposure vaccination efficacy of live smallpox vaccines.	4	12	3.83e-07	ENSGALP00000011319,ENSGALP00000015286,ENSGALP00000042597,ENSGALP00000043092	MYD88,TLR3,TLR4,TLR5
PMID:27574876	(2017) Invasive behavior of Campylobacter jejuni in immunosuppressed chicken.	4	12	3.83e-07	ENSGALP00000011319,ENSGALP00000013260,ENSGALP00000015286,ENSGALP00000042597	MYD88,TLR15,TLR4,TLR5
PMID:27976670	(2016) Lyme borreliosis.	4	12	3.83e-07	ENSGALP00000015286,ENSGALP00000035830,ENSGALP00000038134,ENSGALP00000042597	MYD88,TLR2-2,TLR5,TLR7
PMID:28780375	(2017) Adjuvant formulations for virus-like particle (VLP) based vaccines.	4	12	3.83e-07	ENSGALP00000011319,ENSGALP00000015286,ENSGALP00000035830,ENSGALP00000043092	TLR3,TLR4,TLR5,TLR7
PMID:29552008	(2018) Induction and Subversion of Human Protective Immunity: Contrasting Influenza and Respiratory Syncytial Virus.	5	40	3.83e-07	ENSGALP00000011319,ENSGALP00000035830,ENSGALP00000038134,ENSGALP00000042597,ENSGALP00000043092	MYD88,TLR2-2,TLR3,TLR4,TLR7
PMID:30736730	(2019) Single stranded (ss)RNA-mediated antiviral response against infectious laryngotracheitis virus infection.	4	12	3.83e-07	ENSGALP00000011319,ENSGALP00000035830,ENSGALP00000038134,ENSGALP00000043092	TLR2-2,TLR3,TLR4,TLR7
PMID:31681318	(2019) Editorial: Ligands, Adaptors and Pathways of TLRs in Non-mammals.	4	12	3.83e-07	ENSGALP00000011319,ENSGALP00000013260,ENSGALP00000042597,ENSGALP00000043092	MYD88,TLR15,TLR3,TLR4
PMID:31720016	(2019) The Effect of a Lipopolysaccharide from Rhodobacter capsulatus PG on Inflammation Caused by Various Influenza Strains.	4	12	3.83e-07	ENSGALP00000011319,ENSGALP00000035830,ENSGALP00000038134,ENSGALP00000043092	TLR2-2,TLR3,TLR4,TLR7
PMID:32568266	(2020) Expression patterns of innate immunity-related genes in response to polyinosinic:polycytidylic acid (poly[I:C]) stimulation in DF-1 chicken fibroblast cells.	4	12	3.83e-07	ENSGALP00000011319,ENSGALP00000013260,ENSGALP00000035830,ENSGALP00000043092	TLR15,TLR3,TLR4,TLR7
PMID:25210785	(2014) Age-dependent enterocyte invasion and microcolony formation by Salmonella.	5	41	4.1e-07	ENSGALP00000011319,ENSGALP00000015286,ENSGALP00000038134,ENSGALP00000042597,ENSGALP00000043092	MYD88,TLR2-2,TLR3,TLR4,TLR5
PMID:22816036	(2012) Recent progress in studies of arterivirus- and coronavirus-host interactions.	5	42	4.56e-07	ENSGALP00000011319,ENSGALP00000012873,ENSGALP00000035830,ENSGALP00000042597,ENSGALP00000043092	MYD88,TLR3,TLR4,TLR7,TRAF6
PMID:19570823	(2009) Ubiquitin-editing enzyme A20 promotes tolerance to lipopolysaccharide in enterocytes.	4	13	4.73e-07	ENSGALP00000011319,ENSGALP00000012873,ENSGALP00000038134,ENSGALP00000042597	MYD88,TLR2-2,TLR4,TRAF6
PMID:20661430	(2010) Rabies virus infection induces type I interferon production in an IPS-1 dependent manner while dendritic cell activation relies on IFNAR signaling.	4	13	4.73e-07	ENSGALP00000011319,ENSGALP00000035830,ENSGALP00000042597,ENSGALP00000043092	MYD88,TLR3,TLR4,TLR7
PMID:21637513	(2009) Inhibition of NF-kB 1 (NF-kBp50) by RNA interference in chicken macrophage HD11 cell line challenged with Salmonellaenteritidis.	4	13	4.73e-07	ENSGALP00000011319,ENSGALP00000012873,ENSGALP00000013260,ENSGALP00000043092	TLR15,TLR3,TLR4,TRAF6
PMID:21698237	(2011) TLR2 signaling contributes to rapid inflammasome activation during F. novicida infection.	4	13	4.73e-07	ENSGALP00000011319,ENSGALP00000015286,ENSGALP00000038134,ENSGALP00000042597	MYD88,TLR2-2,TLR4,TLR5
PMID:22554418	(2012) Age-related changes in CD8 T cell homeostasis and immunity to infection.	4	13	4.73e-07	ENSGALP00000035830,ENSGALP00000035870,ENSGALP00000042597,ENSGALP00000043092	IL7,MYD88,TLR3,TLR7
PMID:24324507	(2013) Modification of intestinal microbiota and its consequences for innate immune response in the pathogenesis of campylobacteriosis.	4	13	4.73e-07	ENSGALP00000011319,ENSGALP00000015286,ENSGALP00000038134,ENSGALP00000042597	MYD88,TLR2-2,TLR4,TLR5
PMID:25880897	(2015) Hm-MyD88 and Hm-SARM: two key regulators of the neuroimmune system and neural repair in the medicinal leech.	4	13	4.73e-07	ENSGALP00000011319,ENSGALP00000012873,ENSGALP00000042597,ENSGALP00000043092	MYD88,TLR3,TLR4,TRAF6
PMID:29280512	(2018) The evolutionary characteristics and structural biology of Gallus toll-like receptor 21.	4	13	4.73e-07	ENSGALP00000011319,ENSGALP00000013260,ENSGALP00000035830,ENSGALP00000038134	TLR15,TLR2-2,TLR4,TLR7
PMID:31379864	(2019) Porcine Beta-Defensin 2 Provides Protection Against Bacterial Infection by a Direct Bactericidal Activity and Alleviates Inflammation via Interference With the TLR4NF-KB Pathway.	4	13	4.73e-07	ENSGALP00000011319,ENSGALP00000038134,ENSGALP00000042597,ENSGALP00000043092	MYD88,TLR2-2,TLR3,TLR4
PMID:31564895	(2019) Atractylodes macrocephala polysaccharides regulate the innate immunity of colorectal cancer cells by modulating the TLR4 signaling pathway.	4	13	4.73e-07	ENSGALP00000011319,ENSGALP00000012873,ENSGALP00000038134,ENSGALP00000042597	MYD88,TLR2-2,TLR4,TRAF6
PMID:23601689	(2013) Systems scale interactive exploration reveals quantitative and qualitative differences in response to influenza and pneumococcal vaccines.	5	43	4.86e-07	ENSGALP00000011319,ENSGALP00000015286,ENSGALP00000035830,ENSGALP00000035870,ENSGALP00000041692	IL7,TLR4,TLR5,TLR7,VAV1
PMID:24555469	(2014) The basic biology of redoxosomes in cytokine-mediated signal transduction and implications for disease-specific therapies.	5	43	4.86e-07	ENSGALP00000012873,ENSGALP00000027049,ENSGALP00000037001,ENSGALP00000041692,ENSGALP00000042597	IL1R1,MYD88,RAC2,TRAF6,VAV1
PMID:25815272	(2015) Modulation of Immune Cell Functions by the E3 Ligase Cbl-b.	5	43	4.86e-07	ENSGALP00000011319,ENSGALP00000024180,ENSGALP00000041692,ENSGALP00000042597,ENSGALP00000043092	FYN,MYD88,TLR3,TLR4,VAV1
PMID:31720042	(2019) The Interplay between Host Immunity and Respiratory Viral Infection in Asthma Exacerbation.	5	44	5.34e-07	ENSGALP00000011319,ENSGALP00000035830,ENSGALP00000038134,ENSGALP00000042597,ENSGALP00000043092	MYD88,TLR2-2,TLR3,TLR4,TLR7
PMID:18769719	(2008) Superior immunogenicity of inactivated whole virus H5N1 influenza vaccine is primarily controlled by Toll-like receptor signalling.	4	14	5.73e-07	ENSGALP00000011319,ENSGALP00000035830,ENSGALP00000042597,ENSGALP00000043092	MYD88,TLR3,TLR4,TLR7
PMID:18957937	(2008) PLP2, a potent deubiquitinase from murine hepatitis virus, strongly inhibits cellular type I interferon production.	4	14	5.73e-07	ENSGALP00000012873,ENSGALP00000035830,ENSGALP00000042597,ENSGALP00000043092	MYD88,TLR3,TLR7,TRAF6
PMID:19201879	(2009) TANK-binding kinase-1 plays an important role during in vitro and in vivo type I IFN responses to DNA virus infections.	4	14	5.73e-07	ENSGALP00000011319,ENSGALP00000012873,ENSGALP00000035830,ENSGALP00000043092	TLR3,TLR4,TLR7,TRAF6
PMID:20941330	(2010) Induction of Toll-like receptor 3-mediated immunity during gestation inhibits cortical neurogenesis and causes behavioral disturbances.	4	14	5.73e-07	ENSGALP00000011319,ENSGALP00000035830,ENSGALP00000038134,ENSGALP00000043092	TLR2-2,TLR3,TLR4,TLR7
PMID:21375734	(2011) Toll-like receptor pre-stimulation protects mice against lethal infection with highly pathogenic influenza viruses.	4	14	5.73e-07	ENSGALP00000011319,ENSGALP00000035830,ENSGALP00000038134,ENSGALP00000043092	TLR2-2,TLR3,TLR4,TLR7
PMID:23516365	(2013) Synergistic induction of interferon Alfa through TLR-3 and TLR-9 agonists identifies CD21 as interferon Alfa receptor for the B cell response.	4	14	5.73e-07	ENSGALP00000035830,ENSGALP00000038134,ENSGALP00000042597,ENSGALP00000043092	MYD88,TLR2-2,TLR3,TLR7
PMID:23781124	(2013) Differential regulation of inflammation and immunity in mild and severe experimental asthma.	4	14	5.73e-07	ENSGALP00000011319,ENSGALP00000035830,ENSGALP00000038134,ENSGALP00000043092	TLR2-2,TLR3,TLR4,TLR7
PMID:24061543	(2013) Role of natural killer and Gamma-delta T cells in West Nile virus infection.	4	14	5.73e-07	ENSGALP00000011319,ENSGALP00000035830,ENSGALP00000042597,ENSGALP00000043092	MYD88,TLR3,TLR4,TLR7
PMID:26021751	(2015) The effects of H3N2 swine influenza virus infection on TLRs and RLRs signaling pathways in porcine alveolar macrophages.	4	14	5.73e-07	ENSGALP00000012873,ENSGALP00000035830,ENSGALP00000042597,ENSGALP00000043092	MYD88,TLR3,TLR7,TRAF6
PMID:26347747	(2015) HIV-1 Structural Proteins Serve as PAMPs for TLR2 Heterodimers Significantly Increasing Infection and Innate Immune Activation.	4	14	5.73e-07	ENSGALP00000011319,ENSGALP00000035830,ENSGALP00000038134,ENSGALP00000043092	TLR2-2,TLR3,TLR4,TLR7
PMID:26401006	(2015) Differential Roles of Chemokines CCL2 and CCL7 in Monocytosis and Leukocyte Migration during West Nile Virus Infection.	4	14	5.73e-07	ENSGALP00000011319,ENSGALP00000038134,ENSGALP00000042597,ENSGALP00000043092	MYD88,TLR2-2,TLR3,TLR4
PMID:27199963	(2016) Expression of Immune-Related Genes of Ducks Infected with Avian Pathogenic Escherichia coli (APEC).	4	14	5.73e-07	ENSGALP00000011319,ENSGALP00000013260,ENSGALP00000015286,ENSGALP00000038134	TLR15,TLR2-2,TLR4,TLR5
PMID:28303139	(2017) Evolution of Interferons and Interferon Receptors.	5	45	5.73e-07	ENSGALP00000011319,ENSGALP00000015286,ENSGALP00000035830,ENSGALP00000038134,ENSGALP00000043092	TLR2-2,TLR3,TLR4,TLR5,TLR7
PMID:29027827	(2017) Triggering receptor expressed on myeloid cells in the pathogenesis of periodontitis: potential novel treatment strategies.	4	14	5.73e-07	ENSGALP00000011319,ENSGALP00000015286,ENSGALP00000038134,ENSGALP00000042597	MYD88,TLR2-2,TLR4,TLR5
PMID:30792697	(2019) Physical Activity and Bone Health: What Is the Role of Immune System? A Narrative Review of the Third Way.	5	46	6.19e-07	ENSGALP00000011319,ENSGALP00000012873,ENSGALP00000035870,ENSGALP00000038134,ENSGALP00000043092	IL7,TLR2-2,TLR3,TLR4,TRAF6
PMID:32041125	(2020) Dual Role of Chondrocytes in Rheumatoid Arthritis: The Chicken and the Egg.	5	46	6.19e-07	ENSGALP00000011319,ENSGALP00000012873,ENSGALP00000020572,ENSGALP00000035870,ENSGALP00000038134	IL7,PTCH1,TLR2-2,TLR4,TRAF6
PMID:20454607	(2010) Tobacco upregulates P. gingivalis fimbrial proteins which induce TLR2 hyposensitivity.	4	15	6.82e-07	ENSGALP00000011319,ENSGALP00000012873,ENSGALP00000038134,ENSGALP00000042597	MYD88,TLR2-2,TLR4,TRAF6
PMID:20619890	(2010) Differential host response to LPS variants in amniochorion and the TLR4MD-2 system in Macaca nemestrina.	4	15	6.82e-07	ENSGALP00000011319,ENSGALP00000038134,ENSGALP00000042597,ENSGALP00000043092	MYD88,TLR2-2,TLR3,TLR4
PMID:21918197	(2011) Anti-CD180 (RP105) activates B cells to rapidly produce polyclonal Ig via a T cell and MyD88-independent pathway.	4	15	6.82e-07	ENSGALP00000011319,ENSGALP00000035830,ENSGALP00000038134,ENSGALP00000042597	MYD88,TLR2-2,TLR4,TLR7
PMID:24928049	(2014) Modulation of innate immune signaling by the secreted form of the West Nile virus NS1 glycoprotein.	4	15	6.82e-07	ENSGALP00000011319,ENSGALP00000035830,ENSGALP00000042597,ENSGALP00000043092	MYD88,TLR3,TLR4,TLR7
PMID:25100081	(2014) IRF7 in the Australian black flying fox, Pteropus alecto: evidence for a unique expression pattern and functional conservation.	4	15	6.82e-07	ENSGALP00000011319,ENSGALP00000012873,ENSGALP00000035830,ENSGALP00000043092	TLR3,TLR4,TLR7,TRAF6
PMID:26082934	(....) Significance of arachidonic acid in ocular infections and inflammation.	4	15	6.82e-07	ENSGALP00000011319,ENSGALP00000035830,ENSGALP00000038134,ENSGALP00000043092	TLR2-2,TLR3,TLR4,TLR7
PMID:27157497	(2017) Innate recognition of Toxoplasma gondii in humans involves a mechanism distinct from that utilized by rodents.	4	15	6.82e-07	ENSGALP00000011319,ENSGALP00000015286,ENSGALP00000035830,ENSGALP00000043092	TLR3,TLR4,TLR5,TLR7
PMID:28490801	(2017) Dendritic cells provide a therapeutic target for synthetic small molecule analogues of the parasitic worm product, ES-62.	4	15	6.82e-07	ENSGALP00000011319,ENSGALP00000038134,ENSGALP00000042597,ENSGALP00000043092	MYD88,TLR2-2,TLR3,TLR4
PMID:28544607	(2017) Spotted Gar and the Evolution of Innate Immune Receptors.	4	15	6.82e-07	ENSGALP00000011319,ENSGALP00000038134,ENSGALP00000042597,ENSGALP00000043092	MYD88,TLR2-2,TLR3,TLR4
PMID:28645300	(2017) Bacterial ghosts as adjuvants: mechanisms and potential.	4	15	6.82e-07	ENSGALP00000011319,ENSGALP00000015286,ENSGALP00000038134,ENSGALP00000042597	MYD88,TLR2-2,TLR4,TLR5
PMID:20392288	(2010) Overview of the biology of type I interferons.	5	49	7.95e-07	ENSGALP00000011319,ENSGALP00000035830,ENSGALP00000038134,ENSGALP00000042597,ENSGALP00000043092	MYD88,TLR2-2,TLR3,TLR4,TLR7
PMID:30545299	(2018) Transcriptome profile in bursa of Fabricius reveals potential mode for stress-influenced immune function in chicken stress model.	5	49	7.95e-07	ENSGALP00000000518,ENSGALP00000011319,ENSGALP00000035870,ENSGALP00000042597,ENSGALP00000043092	IL7,ITGB3,MYD88,TLR3,TLR4
PMID:21996340	(2011) Polyinosinic:polycytidylic acid induces protein kinase D-dependent disassembly of apical junctions and barrier dysfunction in airway epithelial cells.	4	16	8.15e-07	ENSGALP00000011319,ENSGALP00000015286,ENSGALP00000038134,ENSGALP00000043092	TLR2-2,TLR3,TLR4,TLR5
PMID:27720760	(2017) Trim32 Deficiency Enhances Th2 Immunity and Predisposes to Features of Atopic Dermatitis.	4	16	8.15e-07	ENSGALP00000011319,ENSGALP00000035830,ENSGALP00000038134,ENSGALP00000042597	MYD88,TLR2-2,TLR4,TLR7
PMID:21079759	(2010) Platelet-activating factor receptor plays a role in lung injury and death caused by Influenza A in mice.	4	17	9.98e-07	ENSGALP00000011319,ENSGALP00000027049,ENSGALP00000035830,ENSGALP00000043092	IL1R1,TLR3,TLR4,TLR7
PMID:22095710	(2011) The proteoglycan biglycan enhances antigen-specific T cell activation potentially via MyD88 and TRIF pathways and triggers autoimmune perimyocarditis.	4	17	9.98e-07	ENSGALP00000011319,ENSGALP00000038134,ENSGALP00000042597,ENSGALP00000043092	MYD88,TLR2-2,TLR3,TLR4
PMID:22724060	(2012) Mice, men and the relatives: cross-species studies underpin innate immunity.	4	17	9.98e-07	ENSGALP00000013260,ENSGALP00000035830,ENSGALP00000038134,ENSGALP00000042597	MYD88,TLR15,TLR2-2,TLR7
PMID:28526855	(2017) Gut homeostasis and regulatory T cell induction depend on molecular chaperone gp96 in CD11c+ cells.	4	17	9.98e-07	ENSGALP00000011319,ENSGALP00000015286,ENSGALP00000038134,ENSGALP00000042597	MYD88,TLR2-2,TLR4,TLR5
PMID:28676793	(2017) Immune Responses of Chickens Infected with Wild Bird-Origin H5N6 Avian Influenza Virus.	4	17	9.98e-07	ENSGALP00000012873,ENSGALP00000035830,ENSGALP00000042597,ENSGALP00000043092	MYD88,TLR3,TLR7,TRAF6
PMID:30201735	(2018) TLR Stimulation during T-cell Activation Lowers PD-1 Expression on CD8+ T Cells.	4	17	9.98e-07	ENSGALP00000011319,ENSGALP00000035830,ENSGALP00000038134,ENSGALP00000043092	TLR2-2,TLR3,TLR4,TLR7
PMID:17371930	(2007) Diacylglycerol kinase zeta regulates microbial recognition and host resistance to Toxoplasma gondii.	4	18	1.19e-06	ENSGALP00000011319,ENSGALP00000038134,ENSGALP00000042597,ENSGALP00000043092	MYD88,TLR2-2,TLR3,TLR4
PMID:19362020	(2009) The NLRP3 inflammasome mediates in vivo innate immunity to influenza A virus through recognition of viral RNA.	4	18	1.19e-06	ENSGALP00000027049,ENSGALP00000035830,ENSGALP00000042597,ENSGALP00000043092	IL1R1,MYD88,TLR3,TLR7
PMID:22314134	(2012) A TLR4 agonist synergizes with dendritic cell-directed lentiviral vectors for inducing antigen-specific immune responses.	4	18	1.19e-06	ENSGALP00000011319,ENSGALP00000038134,ENSGALP00000042597,ENSGALP00000043092	MYD88,TLR2-2,TLR3,TLR4
PMID:24709051	(2014) The porcine innate immune system: an update.	5	54	1.19e-06	ENSGALP00000011319,ENSGALP00000012873,ENSGALP00000035830,ENSGALP00000038134,ENSGALP00000043092	TLR2-2,TLR3,TLR4,TLR7,TRAF6
PMID:24743339	(2014) Modified vaccinia virus Ankara triggers type I IFN production in murine conventional dendritic cells via a cGASSTING-mediated cytosolic DNA-sensing pathway.	4	18	1.19e-06	ENSGALP00000035830,ENSGALP00000038134,ENSGALP00000042597,ENSGALP00000043092	MYD88,TLR2-2,TLR3,TLR7
PMID:25229259	(2014) Gastroduodenal mucosal defense.	4	18	1.19e-06	ENSGALP00000011319,ENSGALP00000015286,ENSGALP00000038134,ENSGALP00000043092	TLR2-2,TLR3,TLR4,TLR5
PMID:26332507	(2015) Lipocalin-2 ensures host defense against Salmonella Typhimurium by controlling macrophage iron homeostasis and immune response.	4	18	1.19e-06	ENSGALP00000011319,ENSGALP00000015286,ENSGALP00000038134,ENSGALP00000043092	TLR2-2,TLR3,TLR4,TLR5
PMID:27956526	(2017) TLR10 Is a B Cell Intrinsic Suppressor of Adaptive Immune Responses.	4	18	1.19e-06	ENSGALP00000035830,ENSGALP00000038134,ENSGALP00000042597,ENSGALP00000043092	MYD88,TLR2-2,TLR3,TLR7
PMID:29312337	(2017) Allicin Alleviates Reticuloendotheliosis Virus-Induced Immunosuppression via ERKMitogen-Activated Protein Kinase Pathway in Specific Pathogen-Free Chickens.	4	18	1.19e-06	ENSGALP00000011319,ENSGALP00000035830,ENSGALP00000042597,ENSGALP00000043092	MYD88,TLR3,TLR4,TLR7
PMID:31952471	(2020) Accumulation of genetic variants associated with immunity in the selective breeding of broilers.	4	18	1.19e-06	ENSGALP00000011319,ENSGALP00000015286,ENSGALP00000038134,ENSGALP00000043092	TLR2-2,TLR3,TLR4,TLR5
PMID:25062998	(2014) Mast cell function: a new vision of an old cell.	5	56	1.38e-06	ENSGALP00000011319,ENSGALP00000012873,ENSGALP00000035830,ENSGALP00000038134,ENSGALP00000043092	TLR2-2,TLR3,TLR4,TLR7,TRAF6
PMID:19864182	(2009) Innate immune responses to influenza A H5N1: friend or foe?	4	19	1.39e-06	ENSGALP00000011319,ENSGALP00000012873,ENSGALP00000042597,ENSGALP00000043092	MYD88,TLR3,TLR4,TRAF6
PMID:20832341	(2010) Human TRAF3 adaptor molecule deficiency leads to impaired Toll-like receptor 3 response and susceptibility to herpes simplex encephalitis.	4	19	1.39e-06	ENSGALP00000011319,ENSGALP00000035830,ENSGALP00000042597,ENSGALP00000043092	MYD88,TLR3,TLR4,TLR7
PMID:22516959	(2012) TLR9 and MyD88 are crucial for the development of protective immunity to malaria.	4	19	1.39e-06	ENSGALP00000011319,ENSGALP00000038134,ENSGALP00000042597,ENSGALP00000043092	MYD88,TLR2-2,TLR3,TLR4
PMID:23314004	(2013) IL-1R signaling in dendritic cells replaces pattern-recognition receptors in promoting CD8+ T cell responses to influenza A virus.	4	19	1.39e-06	ENSGALP00000011319,ENSGALP00000035830,ENSGALP00000042597,ENSGALP00000043092	MYD88,TLR3,TLR4,TLR7
PMID:26205674	(2015) Treatment of chronic hepatitis B with pattern recognition receptor agonists: Current status and potential for a cure.	4	19	1.39e-06	ENSGALP00000011319,ENSGALP00000035830,ENSGALP00000038134,ENSGALP00000043092	TLR2-2,TLR3,TLR4,TLR7
PMID:27233962	(2016) STAT2 Is Required for TLR-Induced Murine Dendritic Cell Activation and Cross-Presentation.	4	19	1.39e-06	ENSGALP00000011319,ENSGALP00000035830,ENSGALP00000042597,ENSGALP00000043092	MYD88,TLR3,TLR4,TLR7
PMID:31160675	(2019) Combination of TLR2 and TLR3 agonists derepress infectious bursal disease virus vaccine-induced immunosuppression in the chicken.	4	19	1.39e-06	ENSGALP00000035830,ENSGALP00000038134,ENSGALP00000042597,ENSGALP00000043092	MYD88,TLR2-2,TLR3,TLR7
PMID:31333674	(2019) Combined Photosensitization and Vaccination Enable CD8 T-Cell Immunity and Tumor Suppression Independent of CD4 T-Cell Help.	4	19	1.39e-06	ENSGALP00000011319,ENSGALP00000035830,ENSGALP00000038134,ENSGALP00000043092	TLR2-2,TLR3,TLR4,TLR7
PMID:31165788	(2019) Pathobiology of inherited biliary diseases: a roadmap to understand acquired liver diseases.	5	57	1.46e-06	ENSGALP00000011319,ENSGALP00000015286,ENSGALP00000038134,ENSGALP00000042597,ENSGALP00000043092	MYD88,TLR2-2,TLR3,TLR4,TLR5
PMID:22359107	(2012) Novel players in inflammatory bowel disease pathogenesis.	4	20	1.62e-06	ENSGALP00000011319,ENSGALP00000015286,ENSGALP00000038134,ENSGALP00000042597	MYD88,TLR2-2,TLR4,TLR5
PMID:23255875	(2012) Innate Immunity and the Role of Epithelial Barrier During Aspergillus fumigatus Infection.	4	20	1.62e-06	ENSGALP00000011319,ENSGALP00000027049,ENSGALP00000038134,ENSGALP00000042597	IL1R1,MYD88,TLR2-2,TLR4
PMID:24735374	(2014) Bifidobacterium breve and Lactobacillus rhamnosus treatment is as effective as budesonide at reducing inflammation in a murine model for chronic asthma.	4	20	1.62e-06	ENSGALP00000011319,ENSGALP00000015286,ENSGALP00000038134,ENSGALP00000043092	TLR2-2,TLR3,TLR4,TLR5
PMID:27224911	(2016) Increased translocation of antigens to endosomes and TLR4 mediated endosomal recruitment of TAP contribute to nicotine augmented cross-presentation.	4	20	1.62e-06	ENSGALP00000011319,ENSGALP00000035830,ENSGALP00000042597,ENSGALP00000043092	MYD88,TLR3,TLR4,TLR7
PMID:31985363	(2020) Regulation of Immunity-Related Genes by Infectious Bronchitis Virus Challenge in Spleen of Laying Chickens.	4	20	1.62e-06	ENSGALP00000015286,ENSGALP00000035830,ENSGALP00000035870,ENSGALP00000043092	IL7,TLR3,TLR5,TLR7
PMID:32083100	(2020) Floods, Hurricanes, and Other Catastrophes: A Challenge for the Immune System of Livestock and Other Animals.	4	20	1.62e-06	ENSGALP00000011319,ENSGALP00000015286,ENSGALP00000027049,ENSGALP00000038134	IL1R1,TLR2-2,TLR4,TLR5
PMID:18394716	(2008) Toll-like receptor gene expression in cecum and spleen of advanced intercross line chicks infected with Salmonella enterica serovar Enteritidis.	3	3	1.89e-06	ENSGALP00000011319,ENSGALP00000015286,ENSGALP00000038134	TLR2-2,TLR4,TLR5
PMID:19276417	(2009) Genetic lines differ in Toll-like receptor gene expression in spleens of chicks inoculated with Salmonella enterica serovar Enteritidis.	3	3	1.89e-06	ENSGALP00000011319,ENSGALP00000015286,ENSGALP00000038134	TLR2-2,TLR4,TLR5
PMID:20020828	(2010) Innate immune evasion strategies of influenza viruses.	4	21	1.89e-06	ENSGALP00000011319,ENSGALP00000012873,ENSGALP00000035830,ENSGALP00000043092	TLR3,TLR4,TLR7,TRAF6
PMID:20053507	(2010) Up-regulation of the MyD88-dependent pathway of TLR signaling in spleen and caecum of young chickens infected with Salmonella serovar Pullorum.	3	3	1.89e-06	ENSGALP00000011319,ENSGALP00000012873,ENSGALP00000042597	MYD88,TLR4,TRAF6
PMID:22230951	(2012) Of ticks, mice and men: understanding the dual-host lifestyle of Lyme disease spirochaetes.	4	21	1.89e-06	ENSGALP00000015286,ENSGALP00000035830,ENSGALP00000038134,ENSGALP00000042597	MYD88,TLR2-2,TLR5,TLR7
PMID:23352867	(2013) Upregulation of chicken TLR4, TLR15 and MyD88 in heterophils and monocyte-derived macrophages stimulated with Eimeria tenella in vitro.	3	3	1.89e-06	ENSGALP00000011319,ENSGALP00000013260,ENSGALP00000042597	MYD88,TLR15,TLR4
PMID:24412527	(2014) From stool transplants to next-generation microbiota therapeutics.	3	3	1.89e-06	ENSGALP00000011319,ENSGALP00000015286,ENSGALP00000042597	MYD88,TLR4,TLR5
PMID:24566961	(2014) TLR4 single nucleotide polymorphisms (SNPs) associated with Salmonella shedding in pigs.	3	3	1.89e-06	ENSGALP00000011319,ENSGALP00000015286,ENSGALP00000038134	TLR2-2,TLR4,TLR5
PMID:24989828	(2014) NLR proteins and parasitic disease.	4	21	1.89e-06	ENSGALP00000011319,ENSGALP00000035830,ENSGALP00000038134,ENSGALP00000042597	MYD88,TLR2-2,TLR4,TLR7
PMID:25626717	(2015) Characterisation of Toll-like receptors 4, 5 and 7 and their genetic variation in the grey partridge.	3	3	1.89e-06	ENSGALP00000011319,ENSGALP00000015286,ENSGALP00000035830	TLR4,TLR5,TLR7
PMID:26597188	(2016) Activation of Toll-like receptor 3 inhibits Marek's disease virus infection in chicken embryo fibroblast cells.	3	3	1.89e-06	ENSGALP00000038134,ENSGALP00000042597,ENSGALP00000043092	MYD88,TLR2-2,TLR3
PMID:28541576	(2017) Rapidly Evolving Toll-34 Genes Encode Male-Specific Toll-Like Receptors in Drosophila.	3	3	1.89e-06	ENSGALP00000011319,ENSGALP00000035830,ENSGALP00000043092	TLR3,TLR4,TLR7
PMID:29765997	(2018) Effects of Oral Probiotic Feeding on Toll-Like Receptor Gene Expression of the Chicken's Cecal Tonsil.	3	3	1.89e-06	ENSGALP00000011319,ENSGALP00000015286,ENSGALP00000038134	TLR2-2,TLR4,TLR5
PMID:30134201	(2018) IgA Responses to Microbiota.	4	21	1.89e-06	ENSGALP00000011319,ENSGALP00000015286,ENSGALP00000038134,ENSGALP00000042597	MYD88,TLR2-2,TLR4,TLR5
PMID:30600465	(2019) Development and biochemical and immunological characterization of early passage and immortalized bovine intestinal epithelial cell lines from the ileum of a young calf.	4	21	1.89e-06	ENSGALP00000011319,ENSGALP00000015286,ENSGALP00000038134,ENSGALP00000043092	TLR2-2,TLR3,TLR4,TLR5
PMID:31455651	(2019) Interferon-Induced Protein 44 Interacts with Cellular FK506-Binding Protein 5, Negatively Regulates Host Antiviral Responses, and Supports Virus Replication.	4	21	1.89e-06	ENSGALP00000012873,ENSGALP00000035830,ENSGALP00000038134,ENSGALP00000043092	TLR2-2,TLR3,TLR7,TRAF6
PMID:32183199	(2020) Salmonella Virulence and Immune Escape.	4	21	1.89e-06	ENSGALP00000011319,ENSGALP00000015286,ENSGALP00000038134,ENSGALP00000042597	MYD88,TLR2-2,TLR4,TLR5
PMID:32524263	(2020) Infectious bronchitis virus inhibits activation of the TLR7 pathway, but not the TLR3 pathway.	3	3	1.89e-06	ENSGALP00000035830,ENSGALP00000042597,ENSGALP00000043092	MYD88,TLR3,TLR7
PMID:26257731	(2015) Modulating the Innate Immune Response to Influenza A Virus: Potential Therapeutic Use of Anti-Inflammatory Drugs.	5	62	2e-06	ENSGALP00000011319,ENSGALP00000015286,ENSGALP00000035830,ENSGALP00000038134,ENSGALP00000043092	TLR2-2,TLR3,TLR4,TLR5,TLR7
PMID:20181884	(2010) CpG-B oligodeoxynucleotides inhibit TLR-dependent and -independent induction of type I IFN in dendritic cells.	4	22	2.1e-06	ENSGALP00000011319,ENSGALP00000035830,ENSGALP00000042597,ENSGALP00000043092	MYD88,TLR3,TLR4,TLR7
PMID:23526820	(2013) Inflammatory response of mast cells during influenza A virus infection is mediated by active infection and RIG-I signaling.	4	22	2.1e-06	ENSGALP00000011319,ENSGALP00000035830,ENSGALP00000038134,ENSGALP00000043092	TLR2-2,TLR3,TLR4,TLR7
PMID:24418046	(2014) In vitro and ex vivo analyses of co-infections with swine influenza and porcine reproductive and respiratory syndrome viruses.	4	22	2.1e-06	ENSGALP00000011319,ENSGALP00000035830,ENSGALP00000038134,ENSGALP00000043092	TLR2-2,TLR3,TLR4,TLR7
PMID:26173397	(2015) Beta-Lapachone suppresses neuroinflammation by modulating the expression of cytokines and matrix metalloproteinases in activated microglia.	4	22	2.1e-06	ENSGALP00000011319,ENSGALP00000038134,ENSGALP00000042597,ENSGALP00000043092	MYD88,TLR2-2,TLR3,TLR4
PMID:18668203	(2008) Putting endotoxin to work for us: monophosphoryl lipid A as a safe and effective vaccine adjuvant.	4	23	2.43e-06	ENSGALP00000011319,ENSGALP00000012873,ENSGALP00000038134,ENSGALP00000042597	MYD88,TLR2-2,TLR4,TRAF6
PMID:29098928	(2017) Nanoparticles: augmenting tumor antigen presentation for vaccine and immunotherapy treatments of cancer.	4	23	2.43e-06	ENSGALP00000011319,ENSGALP00000035830,ENSGALP00000038134,ENSGALP00000043092	TLR2-2,TLR3,TLR4,TLR7
PMID:32110391	(2020) Dietary encapsulated essential oils and organic acids mixture improves gut health in broiler chickens challenged with necrotic enteritis.	4	23	2.43e-06	ENSGALP00000011319,ENSGALP00000012873,ENSGALP00000038134,ENSGALP00000042597	MYD88,TLR2-2,TLR4,TRAF6
PMID:22249201	(2012) Expression profiles of human interferon-alpha and interferon-lambda subtypes are ligand- and cell-dependent.	4	24	2.81e-06	ENSGALP00000011319,ENSGALP00000035830,ENSGALP00000042597,ENSGALP00000043092	MYD88,TLR3,TLR4,TLR7
PMID:25740947	(2015) B cell Rab7 mediates induction of activation-induced cytidine deaminase expression and class-switching in T-dependent and T-independent antibody responses.	4	24	2.81e-06	ENSGALP00000011319,ENSGALP00000012873,ENSGALP00000023991,ENSGALP00000035830	ITGA2,TLR4,TLR7,TRAF6
PMID:20004021	(2010) A five-amino-acid motif in the undefined region of the TLR8 ectodomain is required for species-specific ligand recognition.	3	4	3.04e-06	ENSGALP00000011319,ENSGALP00000035830,ENSGALP00000043092	TLR3,TLR4,TLR7
PMID:20970931	(2010) Transcriptional profiling of Toll-like receptors in chicken embryos and in the ovary during sexual maturation and in response to Salmonella enteritidis infection.	3	4	3.04e-06	ENSGALP00000011319,ENSGALP00000013260,ENSGALP00000043092	TLR15,TLR3,TLR4
PMID:25071775	(2014) Distinct functional programs in fetal T and myeloid lineages.	3	4	3.04e-06	ENSGALP00000011319,ENSGALP00000015286,ENSGALP00000038134	TLR2-2,TLR4,TLR5
PMID:29893971	(2018) Purifying Selection in the Toll-Like Receptors of Song Sparrows Melospiza melodia.	3	4	3.04e-06	ENSGALP00000011319,ENSGALP00000013260,ENSGALP00000043092	TLR15,TLR3,TLR4
PMID:31726559	(2019) Microbiome composition of airborne particulate matter from livestock farms and their effect on innate immune receptors and cells.	3	4	3.04e-06	ENSGALP00000011319,ENSGALP00000015286,ENSGALP00000038134	TLR2-2,TLR4,TLR5
PMID:23084918	(2012) Intestinal commensal microbes as immune modulators.	4	25	3.19e-06	ENSGALP00000004173,ENSGALP00000015286,ENSGALP00000038134,ENSGALP00000042597	ITGAV,MYD88,TLR2-2,TLR5
PMID:24758278	(2014) Fat body, fat pad and adipose tissues in invertebrates and vertebrates: the nexus.	4	25	3.19e-06	ENSGALP00000011319,ENSGALP00000012873,ENSGALP00000038134,ENSGALP00000042597	MYD88,TLR2-2,TLR4,TRAF6
PMID:27041635	(2016) Aberrant coagulation causes a hyper-inflammatory response in severe influenza pneumonia.	4	25	3.19e-06	ENSGALP00000011319,ENSGALP00000035830,ENSGALP00000042597,ENSGALP00000043092	MYD88,TLR3,TLR4,TLR7
PMID:21897224	(2011) Probiotics and immune health.	4	26	3.64e-06	ENSGALP00000011319,ENSGALP00000035830,ENSGALP00000038134,ENSGALP00000042597	MYD88,TLR2-2,TLR4,TLR7
PMID:29186150	(2017) In vitro enteroid-derived three-dimensional tissue model of human small intestinal epithelium with innate immune responses.	4	26	3.64e-06	ENSGALP00000011319,ENSGALP00000015286,ENSGALP00000038134,ENSGALP00000042597	MYD88,TLR2-2,TLR4,TLR5
PMID:18718859	(2008) Alternative splicing in the NF-kappaB signaling pathway.	4	27	4.15e-06	ENSGALP00000011319,ENSGALP00000012873,ENSGALP00000024180,ENSGALP00000038134	FYN,TLR2-2,TLR4,TRAF6
PMID:22726607	(2012) Cell-intrinsic innate immune control of West Nile virus infection.	4	27	4.15e-06	ENSGALP00000012873,ENSGALP00000035830,ENSGALP00000042597,ENSGALP00000043092	MYD88,TLR3,TLR7,TRAF6
PMID:28545453	(2017) Genome-wide methylation analysis reveals differentially methylated loci that are associated with an age-dependent increase in bovine fibroblast response to LPS.	4	27	4.15e-06	ENSGALP00000011319,ENSGALP00000012873,ENSGALP00000015286,ENSGALP00000038134	TLR2-2,TLR4,TLR5,TRAF6
PMID:19121857	(2009) Peanuts can contribute to anaphylactic shock by activating complement.	3	5	4.68e-06	ENSGALP00000011319,ENSGALP00000038134,ENSGALP00000042597	MYD88,TLR2-2,TLR4
PMID:21818701	(2012) Platelets: versatile effector cells in hemostasis, inflammation, and the immune continuum.	4	28	4.68e-06	ENSGALP00000011319,ENSGALP00000024180,ENSGALP00000038134,ENSGALP00000042597	FYN,MYD88,TLR2-2,TLR4
PMID:22500859	(2012) What have we learned from brucellosis in the mouse model?	4	28	4.68e-06	ENSGALP00000011319,ENSGALP00000015286,ENSGALP00000038134,ENSGALP00000042597	MYD88,TLR2-2,TLR4,TLR5
PMID:23436517	(2013) Effects of probiotic-supplemented diets on growth performance and intestinal immune characteristics of broiler chickens.	3	5	4.68e-06	ENSGALP00000011319,ENSGALP00000035830,ENSGALP00000038134	TLR2-2,TLR4,TLR7
PMID:24174804	(2013) Brain abscess: Current management.	3	5	4.68e-06	ENSGALP00000038134,ENSGALP00000042597,ENSGALP00000043092	MYD88,TLR2-2,TLR3
PMID:25387947	(2014) Protein evolution of Toll-like receptors 4, 5 and 7 within Galloanserae birds.	3	5	4.68e-06	ENSGALP00000011319,ENSGALP00000015286,ENSGALP00000035830	TLR4,TLR5,TLR7
PMID:25799012	(2015) SNP marker discovery in koala TLR genes.	3	5	4.68e-06	ENSGALP00000011319,ENSGALP00000038134,ENSGALP00000043092	TLR2-2,TLR3,TLR4
PMID:26473671	(2015) Immune Responses in Cecal Tonsils of Marek's Disease Virus-Infected Chickens.	3	5	4.68e-06	ENSGALP00000013260,ENSGALP00000015286,ENSGALP00000043092	TLR15,TLR3,TLR5
PMID:26738735	(2016) Reptile Toll-like receptor 5 unveils adaptive evolution of bacterial flagellin recognition.	3	5	4.68e-06	ENSGALP00000011319,ENSGALP00000013260,ENSGALP00000038134	TLR15,TLR2-2,TLR4
PMID:26862758	(2016) TLR4 and TLR78 Adjuvant Combinations Generate Different Vaccine Antigen-Specific Immune Outcomes in Minipigs when Administered via the ID or IN Routes.	3	5	4.68e-06	ENSGALP00000011319,ENSGALP00000035830,ENSGALP00000042597	MYD88,TLR4,TLR7
PMID:27006768	(2016) Effects of thymol and carvacrol supplementation on intestinal integrity and immune responses of broiler chickens challenged with Clostridium perfringens.	3	5	4.68e-06	ENSGALP00000011319,ENSGALP00000038134,ENSGALP00000042597	MYD88,TLR2-2,TLR4
PMID:28106145	(2017) CD1- and CD1+ porcine blood dendritic cells are enriched for the orthologues of the two major mammalian conventional subsets.	4	28	4.68e-06	ENSGALP00000011319,ENSGALP00000015286,ENSGALP00000038134,ENSGALP00000043092	TLR2-2,TLR3,TLR4,TLR5
PMID:30230923	(2019) Comparing the effect of intestinal bacteria from rabbit, pig, and chicken on inflammatory response in cultured rabbit crypt and villus.	3	5	4.68e-06	ENSGALP00000011319,ENSGALP00000038134,ENSGALP00000043092	TLR2-2,TLR3,TLR4
PMID:30989144	(2019) Characterisation of Thrombocytes in Osteichthyes.	4	28	4.68e-06	ENSGALP00000011319,ENSGALP00000027049,ENSGALP00000038134,ENSGALP00000043092	IL1R1,TLR2-2,TLR3,TLR4
PMID:32183481	(2020) Chlamydia psittaci PmpD-N Exacerbated Chicken Macrophage Function by Triggering Th2 Polarization and the TLR2MyD88NF-kappaB Signaling Pathway.	3	5	4.68e-06	ENSGALP00000011319,ENSGALP00000038134,ENSGALP00000042597	MYD88,TLR2-2,TLR4
PMID:20525114	(2007) Annual scientific meeting, edmonton, september 27-30, 2007.	4	29	5.13e-06	ENSGALP00000011319,ENSGALP00000035830,ENSGALP00000037001,ENSGALP00000038134	RAC2,TLR2-2,TLR4,TLR7
PMID:24278020	(2013) Type I and type III interferons drive redundant amplification loops to induce a transcriptional signature in influenza-infected airway epithelia.	4	29	5.13e-06	ENSGALP00000011319,ENSGALP00000035830,ENSGALP00000042597,ENSGALP00000043092	MYD88,TLR3,TLR4,TLR7
PMID:31936320	(2020) Chronic and Acute Toxicities of Aflatoxins: Mechanisms of Action.	4	29	5.13e-06	ENSGALP00000011319,ENSGALP00000023991,ENSGALP00000035830,ENSGALP00000038134	ITGA2,TLR2-2,TLR4,TLR7
PMID:31408949	(2019) Effect of the Large and Small T-Antigens of Human Polyomaviruses on Signaling Pathways.	5	79	5.57e-06	ENSGALP00000011319,ENSGALP00000020572,ENSGALP00000035830,ENSGALP00000038134,ENSGALP00000043092	PTCH1,TLR2-2,TLR3,TLR4,TLR7
PMID:22396652	(2012) A20 (Tnfaip3) deficiency in myeloid cells protects against influenza A virus infection.	4	30	5.74e-06	ENSGALP00000011319,ENSGALP00000012873,ENSGALP00000035830,ENSGALP00000043092	TLR3,TLR4,TLR7,TRAF6
PMID:23237964	(2013) The broad-spectrum antiviral functions of IFIT and IFITM proteins.	4	30	5.74e-06	ENSGALP00000011319,ENSGALP00000035830,ENSGALP00000042597,ENSGALP00000043092	MYD88,TLR3,TLR4,TLR7
PMID:26010753	(2015) Scavenger receptor structure and function in health and disease.	4	30	5.74e-06	ENSGALP00000011319,ENSGALP00000024180,ENSGALP00000038134,ENSGALP00000041692	FYN,TLR2-2,TLR4,VAV1
PMID:26109647	(2015) Ca2+ Signaling but Not Store-Operated Ca2+ Entry Is Required for the Function of Macrophages and Dendritic Cells.	4	30	5.74e-06	ENSGALP00000011319,ENSGALP00000035830,ENSGALP00000038134,ENSGALP00000041692	TLR2-2,TLR4,TLR7,VAV1
PMID:27440122	(2016) Proteomic discovery of host kinase signaling in bacterial infections.	4	30	5.74e-06	ENSGALP00000011319,ENSGALP00000024180,ENSGALP00000035830,ENSGALP00000038134	FYN,TLR2-2,TLR4,TLR7
PMID:30254636	(2018) The Journey of in vivo Virus Engineered Dendritic Cells From Bench to Bedside: A Bumpy Road.	4	30	5.74e-06	ENSGALP00000011319,ENSGALP00000015286,ENSGALP00000035830,ENSGALP00000043092	TLR3,TLR4,TLR5,TLR7
PMID:30894853	(2019) Characterization and Transcript Expression Analyses of Atlantic Cod Viperin.	4	30	5.74e-06	ENSGALP00000012873,ENSGALP00000038134,ENSGALP00000042597,ENSGALP00000043092	MYD88,TLR2-2,TLR3,TRAF6
PMID:31080827	(2019) Toxoplasma gondii Modulates the Host Cell Responses: An Overview of Apoptosis Pathways.	4	30	5.74e-06	ENSGALP00000011319,ENSGALP00000012873,ENSGALP00000038134,ENSGALP00000042597	MYD88,TLR2-2,TLR4,TRAF6
PMID:20962772	(2011) Intestinal macrophages and response to microbial encroachment.	4	31	6.34e-06	ENSGALP00000011319,ENSGALP00000012873,ENSGALP00000038134,ENSGALP00000043092	TLR2-2,TLR3,TLR4,TRAF6
PMID:26184332	(2015) Sensors of Infection: Viral Nucleic Acid PRRs in Fish.	4	31	6.34e-06	ENSGALP00000012873,ENSGALP00000038134,ENSGALP00000042597,ENSGALP00000043092	MYD88,TLR2-2,TLR3,TRAF6
PMID:19201111	(2009) Expression profile of toll-like receptors within the gastrointestinal tract of 2-day-old Salmonella enteriditis-infected broiler chickens.	3	6	6.48e-06	ENSGALP00000015286,ENSGALP00000035830,ENSGALP00000038134	TLR2-2,TLR5,TLR7
PMID:20038539	(2010) Activation of human and chicken toll-like receptors by Campylobacter spp.	3	6	6.48e-06	ENSGALP00000011319,ENSGALP00000015286,ENSGALP00000038134	TLR2-2,TLR4,TLR5
PMID:21176773	(2011) Expression of Toll-like receptors and antimicrobial peptides during Eimeria praecox infection in chickens.	3	6	6.48e-06	ENSGALP00000011319,ENSGALP00000013260,ENSGALP00000043092	TLR15,TLR3,TLR4
PMID:21616433	(2011) Host defense pathways: role of redundancy and compensation in infectious disease phenotypes.	3	6	6.48e-06	ENSGALP00000011319,ENSGALP00000035830,ENSGALP00000038134	TLR2-2,TLR4,TLR7
PMID:22244688	(2012) Analysis of immune-related gene expression in chicken peripheral blood mononuclear cells following Salmonella enterica serovar Enteritidis infection in vitro.	3	6	6.48e-06	ENSGALP00000011319,ENSGALP00000013260,ENSGALP00000015286	TLR15,TLR4,TLR5
PMID:22844473	(2012) Beta-Glucan derived from Aureobasidium pullulans is effective for the prevention of influenza in mice.	3	6	6.48e-06	ENSGALP00000023991,ENSGALP00000035830,ENSGALP00000042597	ITGA2,MYD88,TLR7
PMID:23437263	(2013) The effects of oral and enteric Campylobacter concisus strains on expression of TLR4, MD-2, TLR2, TLR5 and COX-2 in HT-29 cells.	3	6	6.48e-06	ENSGALP00000011319,ENSGALP00000015286,ENSGALP00000038134	TLR2-2,TLR4,TLR5
PMID:25166617	(2014) TLR2 signaling decreases transmission of Streptococcus pneumoniae by limiting bacterial shedding in an infant mouse Influenza A co-infection model.	3	6	6.48e-06	ENSGALP00000035830,ENSGALP00000038134,ENSGALP00000043092	TLR2-2,TLR3,TLR7
PMID:25894391	(2015) Toll-like receptor signaling in vertebrates: testing the integration of protein, complex, and pathway data in the protein ontology framework.	3	6	6.48e-06	ENSGALP00000011319,ENSGALP00000012873,ENSGALP00000043092	TLR3,TLR4,TRAF6
PMID:26089947	(2015) The Modified JiuWei QiangHuo Decoction Alleviated Severe Lung Injury Induced by H1N1 Influenza Virus by Regulating the NF- K B Pathway in Mice.	3	6	6.48e-06	ENSGALP00000012873,ENSGALP00000035830,ENSGALP00000042597	MYD88,TLR7,TRAF6
PMID:27980855	(2016) Dissecting the Interplay Between Intestinal Microbiota and Host Immunity in Health and Disease: Lessons Learned from Germfree and Gnotobiotic Animal Models.	3	6	6.48e-06	ENSGALP00000011319,ENSGALP00000035870,ENSGALP00000042597	IL7,MYD88,TLR4
PMID:28246456	(2017) Nutrigenomic evaluation of garlic (Allium sativum) and holy basil (Ocimum sanctum) leaf powder supplementation on growth performance and immune characteristics in broilers.	3	6	6.48e-06	ENSGALP00000011319,ENSGALP00000035830,ENSGALP00000038134	TLR2-2,TLR4,TLR7
PMID:29635053	(2018) Resiquimod enhances mucosal and systemic immunity against avian infectious bronchitis virus vaccine in the chicken.	3	6	6.48e-06	ENSGALP00000011319,ENSGALP00000035830,ENSGALP00000042597	MYD88,TLR4,TLR7
PMID:30635393	(2019) A Prime-Pull-Amplify Vaccination Strategy To Maximize Induction of Circulating and Genital-Resident Intraepithelial CD8+ Memory T Cells.	3	6	6.48e-06	ENSGALP00000035830,ENSGALP00000035870,ENSGALP00000043092	IL7,TLR3,TLR7
PMID:31031640	(2019) Astragalus and Ginseng Polysaccharides Improve Developmental, Intestinal Morphological, and Immune Functional Characters of Weaned Piglets.	3	6	6.48e-06	ENSGALP00000011319,ENSGALP00000012873,ENSGALP00000042597	MYD88,TLR4,TRAF6
PMID:19836896	(2010) Molecular events involved in cellular invasion by Ehrlichia chaffeensis and Anaplasma phagocytophilum.	4	33	7.63e-06	ENSGALP00000011319,ENSGALP00000037001,ENSGALP00000038134,ENSGALP00000042597	MYD88,RAC2,TLR2-2,TLR4
PMID:26587585	(2015) Dendritic Cell-Specific Deletion of Beta-Catenin Results in Fewer Regulatory T-Cells without Exacerbating Autoimmune Collagen-Induced Arthritis.	4	33	7.63e-06	ENSGALP00000011319,ENSGALP00000012873,ENSGALP00000038134,ENSGALP00000042597	MYD88,TLR2-2,TLR4,TRAF6
PMID:19381141	(2009) Autophagy genes in immunity.	4	34	8.48e-06	ENSGALP00000011319,ENSGALP00000035830,ENSGALP00000042597,ENSGALP00000043092	MYD88,TLR3,TLR4,TLR7
PMID:27212682	(2016) Immune evasion of porcine enteric coronaviruses and viral modulation of antiviral innate signaling.	4	34	8.48e-06	ENSGALP00000012873,ENSGALP00000035830,ENSGALP00000038134,ENSGALP00000043092	TLR2-2,TLR3,TLR7,TRAF6
PMID:27742832	(2016) Small Molecule Inhibition of Rab7 Impairs B Cell Class Switching and Plasma Cell Survival To Dampen the Autoantibody Response in Murine Lupus.	4	34	8.48e-06	ENSGALP00000011319,ENSGALP00000023991,ENSGALP00000035830,ENSGALP00000042597	ITGA2,MYD88,TLR4,TLR7
PMID:16798912	(2006) Novel oligodeoxynucleotide agonists of TLR9 containing N3-Me-dC or N1-Me-dG modifications.	3	7	8.79e-06	ENSGALP00000035830,ENSGALP00000042597,ENSGALP00000043092	MYD88,TLR3,TLR7
PMID:20071494	(2010) Characterization of host responses against a recombinant fowlpox virus-vectored vaccine expressing the hemagglutinin antigen of an avian influenza virus.	3	7	8.79e-06	ENSGALP00000035830,ENSGALP00000042597,ENSGALP00000043092	MYD88,TLR3,TLR7
PMID:22072823	(2011) Protease-activated receptor 2 is involved in Th2 responses against Trichinella spiralis infection.	3	7	8.79e-06	ENSGALP00000011319,ENSGALP00000035870,ENSGALP00000043092	IL7,TLR3,TLR4
PMID:22228992	(2011) Effective transcutaneous immunization by antigen-loaded flexible liposome in vivo.	3	7	8.79e-06	ENSGALP00000015286,ENSGALP00000035830,ENSGALP00000038134	TLR2-2,TLR5,TLR7
PMID:22699880	(2012) Expression analysis of turkey (Meleagris gallopavo) toll-like receptors and molecular characterization of avian specific TLR15.	3	7	8.79e-06	ENSGALP00000011319,ENSGALP00000013260,ENSGALP00000043092	TLR15,TLR3,TLR4
PMID:23056391	(2012) Respiratory syncytial virus reverses airway hyperresponsiveness to methacholine in ovalbumin-sensitized mice.	3	7	8.79e-06	ENSGALP00000011319,ENSGALP00000038134,ENSGALP00000043092	TLR2-2,TLR3,TLR4
PMID:23885822	(2013) Clinical vaccine development for H5N1 influenza.	3	7	8.79e-06	ENSGALP00000011319,ENSGALP00000015286,ENSGALP00000042597	MYD88,TLR4,TLR5
PMID:24244627	(2013) High-mobility group box 1 inhibits gastric ulcer healing through Toll-like receptor 4 and receptor for advanced glycation end products.	3	7	8.79e-06	ENSGALP00000011319,ENSGALP00000038134,ENSGALP00000042597	MYD88,TLR2-2,TLR4
PMID:25803644	(2015) Effects of corticosterone and dietary energy on immune function of broiler chickens.	3	7	8.79e-06	ENSGALP00000011319,ENSGALP00000015286,ENSGALP00000038134	TLR2-2,TLR4,TLR5
PMID:25967535	(2015) Identification and functional characterization of Toll-like receptor 2-1 in geese.	3	7	8.79e-06	ENSGALP00000011319,ENSGALP00000015286,ENSGALP00000042597	MYD88,TLR4,TLR5
PMID:27279374	(2016) A Novel R848-Conjugated Inactivated Influenza Virus Vaccine Is Efficacious and Safe in a Neonate Nonhuman Primate Model.	3	7	8.79e-06	ENSGALP00000015286,ENSGALP00000035830,ENSGALP00000038134	TLR2-2,TLR5,TLR7
PMID:28024958	(2017) Outer membrane vesicles harboring modified lipid A moiety augment the efficacy of an influenza vaccine exhibiting reduced endotoxicity in a mouse model.	3	7	8.79e-06	ENSGALP00000011319,ENSGALP00000015286,ENSGALP00000038134	TLR2-2,TLR4,TLR5
PMID:28337196	(2017) Salmonella Typhi Porins OmpC and OmpF Are Potent Adjuvants for T-Dependent and T-Independent Antigens.	3	7	8.79e-06	ENSGALP00000011319,ENSGALP00000038134,ENSGALP00000042597	MYD88,TLR2-2,TLR4
PMID:28427457	(2017) Integrative modelling of TIR domain-containing adaptor molecule inducing interferon-Beta (TRIF) provides insights into its autoinhibited state.	3	7	8.79e-06	ENSGALP00000011319,ENSGALP00000012873,ENSGALP00000043092	TLR3,TLR4,TRAF6
PMID:29312329	(2017) Co-Stimulation of BCR and Toll-Like Receptor 7 Increases Somatic Hypermutation, Memory B Cell Formation, and Secondary Antibody Response to Protein Antigen.	3	7	8.79e-06	ENSGALP00000011319,ENSGALP00000035830,ENSGALP00000042597	MYD88,TLR4,TLR7
PMID:29570417	(2018) Reduction of Marek's Disease Virus Infection by Toll-Like Receptor Ligands in Chicken Embryo Fibroblast Cells.	3	7	8.79e-06	ENSGALP00000011319,ENSGALP00000038134,ENSGALP00000043092	TLR2-2,TLR3,TLR4
PMID:29673353	(2018) Modulation of ovine SBD-1 expression by Saccharomyces cerevisiae in ovine ruminal epithelial cells.	3	7	8.79e-06	ENSGALP00000011319,ENSGALP00000038134,ENSGALP00000042597	MYD88,TLR2-2,TLR4
PMID:30159141	(2018) Effects of dietary Clostridium butyricum supplementation on growth performance, intestinal development, and immune response of weaned piglets challenged with lipopolysaccharide.	3	7	8.79e-06	ENSGALP00000011319,ENSGALP00000038134,ENSGALP00000042597	MYD88,TLR2-2,TLR4
PMID:31293588	(2019) Penaeus monodon IKKs Participate in Regulation of Cytokine-Like System and Antiviral Responses of Innate Immune System.	3	7	8.79e-06	ENSGALP00000011319,ENSGALP00000012873,ENSGALP00000043092	TLR3,TLR4,TRAF6
PMID:23130928	(2012) Dendritic cell-based vaccines: barriers and opportunities.	4	35	8.95e-06	ENSGALP00000011319,ENSGALP00000035830,ENSGALP00000038134,ENSGALP00000043092	TLR2-2,TLR3,TLR4,TLR7
PMID:23850008	(2013) Viral evasion mechanisms of early antiviral responses involving regulation of ubiquitin pathways.	4	35	8.95e-06	ENSGALP00000012873,ENSGALP00000035830,ENSGALP00000042597,ENSGALP00000043092	MYD88,TLR3,TLR7,TRAF6
PMID:27466434	(2016) Thymus transcriptome reveals novel pathways in response to avian pathogenic Escherichia coli infection.	4	35	8.95e-06	ENSGALP00000011319,ENSGALP00000015286,ENSGALP00000035870,ENSGALP00000041692	IL7,TLR4,TLR5,VAV1
PMID:27711235	(2016) Transcriptome Profile of the Chicken Thrombocyte: New Implications as an Advanced Immune Effector Cell.	4	36	9.86e-06	ENSGALP00000008911,ENSGALP00000011319,ENSGALP00000015286,ENSGALP00000038134	BLB2,TLR2-2,TLR4,TLR5
PMID:18827826	(2008) The IL-33ST2 pathway: therapeutic target and novel biomarker.	4	37	1.09e-05	ENSGALP00000011319,ENSGALP00000012873,ENSGALP00000027049,ENSGALP00000042597	IL1R1,MYD88,TLR4,TRAF6
PMID:31906500	(2020) MicroRNAs: Biological Regulators in Pathogen-Host Interactions.	4	37	1.09e-05	ENSGALP00000011319,ENSGALP00000012873,ENSGALP00000038134,ENSGALP00000042597	MYD88,TLR2-2,TLR4,TRAF6
PMID:18803303	(2009) NOD2 plays an important role in the inflammatory responses of microglia and astrocytes to bacterial CNS pathogens.	3	8	1.14e-05	ENSGALP00000011319,ENSGALP00000015286,ENSGALP00000038134	TLR2-2,TLR4,TLR5
PMID:21749706	(2011) Differential modulation of cytokine, chemokine and Toll like receptor expression in chickens infected with classical and variant infectious bursal disease virus.	3	8	1.14e-05	ENSGALP00000035830,ENSGALP00000042597,ENSGALP00000043092	MYD88,TLR3,TLR7
PMID:21857663	(2011) An unusual dimeric structure and assembly for TLR4 regulator RP105-MD-1.	3	8	1.14e-05	ENSGALP00000011319,ENSGALP00000038134,ENSGALP00000043092	TLR2-2,TLR3,TLR4
PMID:21858160	(2011) Toll-like receptor 4 is involved in inflammatory and joint destructive pathways in collagen-induced arthritis in DBA1J mice.	3	8	1.14e-05	ENSGALP00000011319,ENSGALP00000038134,ENSGALP00000042597	MYD88,TLR2-2,TLR4
PMID:23474232	(2013) Vaccine design: emerging concepts and renewed optimism.	3	8	1.14e-05	ENSGALP00000011319,ENSGALP00000035830,ENSGALP00000043092	TLR3,TLR4,TLR7
PMID:24016341	(2013) Innate sensing of viruses by pattern recognition receptors in birds.	3	8	1.14e-05	ENSGALP00000013260,ENSGALP00000035830,ENSGALP00000043092	TLR15,TLR3,TLR7
PMID:25325241	(2014) Virus-like particles as antigenic nanomaterials for inducing protective immune responses in the lung.	3	8	1.14e-05	ENSGALP00000015286,ENSGALP00000035830,ENSGALP00000043092	TLR3,TLR5,TLR7
PMID:27128889	(2016) Forsythoside A Controls Influenza A Virus Infection and Improves the Prognosis by Inhibiting Virus Replication in Mice.	3	8	1.14e-05	ENSGALP00000012873,ENSGALP00000035830,ENSGALP00000042597	MYD88,TLR7,TRAF6
PMID:27212414	(2016) Upregulation of duck interleukin-17A during Riemerella anatipestifer infection.	3	8	1.14e-05	ENSGALP00000011319,ENSGALP00000035830,ENSGALP00000043092	TLR3,TLR4,TLR7
PMID:27486255	(2017) ALV-J strain SCAU-HN06 induces innate immune responses in chicken primary monocyte-derived macrophages.	3	8	1.14e-05	ENSGALP00000011319,ENSGALP00000035830,ENSGALP00000043092	TLR3,TLR4,TLR7
PMID:27766044	(2016) Anti-thrombotic agents derived from snake venom proteins.	3	8	1.14e-05	ENSGALP00000011319,ENSGALP00000038134,ENSGALP00000042597	MYD88,TLR2-2,TLR4
PMID:28382943	(2017) Badger macrophages fail to produce nitric oxide, a key anti-mycobacterial effector molecule.	3	8	1.14e-05	ENSGALP00000011319,ENSGALP00000038134,ENSGALP00000043092	TLR2-2,TLR3,TLR4
PMID:29678225	(2018) Synergistic effect of co-stimulation of membrane and endosomal TLRs on chicken innate immune responses.	3	8	1.14e-05	ENSGALP00000011319,ENSGALP00000035830,ENSGALP00000038134	TLR2-2,TLR4,TLR7
PMID:29805207	(2018) Validation of immunomodulatory effects of lipopolysaccharide through expression profiling of Th1 and Th2 biased genes in Newcastle disease virus vaccinated indigenous chicken.	3	8	1.14e-05	ENSGALP00000011319,ENSGALP00000035830,ENSGALP00000038134	TLR2-2,TLR4,TLR7
PMID:19529776	(2009) The differential interaction of Brucella and ochrobactrum with innate immunity reveals traits related to the evolution of stealthy pathogens.	3	9	1.47e-05	ENSGALP00000015286,ENSGALP00000038134,ENSGALP00000042597	MYD88,TLR2-2,TLR5
PMID:19632728	(2009) Innate immune gene expression differentiates the early avian intestinal response between Salmonella and Campylobacter.	3	9	1.47e-05	ENSGALP00000011319,ENSGALP00000013260,ENSGALP00000015286	TLR15,TLR4,TLR5
PMID:21332897	(2011) The aetiology of bacterial vaginosis.	3	9	1.47e-05	ENSGALP00000011319,ENSGALP00000038134,ENSGALP00000043092	TLR2-2,TLR3,TLR4
PMID:21931849	(2011) The shrimp NF-KB pathway is activated by white spot syndrome virus (WSSV) 449 to facilitate the expression of WSSV069 (ie1), WSSV303 and WSSV371.	3	9	1.47e-05	ENSGALP00000012873,ENSGALP00000042597,ENSGALP00000043092	MYD88,TLR3,TRAF6
PMID:22326592	(2012) Eimeria tenella: expression profiling of toll-like receptors and associated cytokines in the cecum of infected day-old and three-week old SPF chickens.	3	9	1.47e-05	ENSGALP00000011319,ENSGALP00000015286,ENSGALP00000035830	TLR4,TLR5,TLR7
PMID:24510515	(2013) Nonhuman primate models for HIVAIDS vaccine development.	3	9	1.47e-05	ENSGALP00000035830,ENSGALP00000042597,ENSGALP00000043092	MYD88,TLR3,TLR7
PMID:25042205	(2014) Recent insights into the evolution of innate viral sensing in animals.	3	9	1.47e-05	ENSGALP00000015286,ENSGALP00000042597,ENSGALP00000043092	MYD88,TLR3,TLR5
PMID:25200751	(2014) Crucial involvement of xanthine oxidase in the intracellular signalling networks associated with human myeloid cell function.	3	9	1.47e-05	ENSGALP00000011319,ENSGALP00000035830,ENSGALP00000038134	TLR2-2,TLR4,TLR7
PMID:25360076	(2014) TRIF Deficiency does not Affect Severity of Ovalbumin-induced Airway Inflammation in Mice.	3	9	1.47e-05	ENSGALP00000011319,ENSGALP00000042597,ENSGALP00000043092	MYD88,TLR3,TLR4
PMID:27478874	(2016) Transplantation of human skin microbiota in models of atopic dermatitis.	3	9	1.47e-05	ENSGALP00000011319,ENSGALP00000038134,ENSGALP00000043092	TLR2-2,TLR3,TLR4
PMID:28273716	(2017) Lipid Nanoparticle Assisted mRNA Delivery for Potent Cancer Immunotherapy.	3	9	1.47e-05	ENSGALP00000011319,ENSGALP00000035830,ENSGALP00000043092	TLR3,TLR4,TLR7
PMID:28522213	(2017) Harnessing self-assembled peptide nanoparticles in epitope vaccine design.	3	9	1.47e-05	ENSGALP00000035830,ENSGALP00000042597,ENSGALP00000043092	MYD88,TLR3,TLR7
PMID:28674528	(2017) Host Differences Affecting Resistance and Susceptibility of the Second Generation of a Pekin Duck Flock to Duck Hepatitis A Virus Genotype 3.	3	9	1.47e-05	ENSGALP00000011319,ENSGALP00000035830,ENSGALP00000043092	TLR3,TLR4,TLR7
PMID:29033908	(2017) The Bacterial Species Campylobacter jejuni Induce Diverse Innate Immune Responses in Human and Avian Intestinal Epithelial Cells.	3	9	1.47e-05	ENSGALP00000011319,ENSGALP00000015286,ENSGALP00000038134	TLR2-2,TLR4,TLR5
PMID:29408034	(2018) Insights into leghorn male hepatocellular cells response to fowl adenovirus serotype 4 infection by transcriptome analysis.	3	9	1.47e-05	ENSGALP00000015286,ENSGALP00000042597,ENSGALP00000043092	MYD88,TLR3,TLR5
PMID:32099648	(2020) Clostridium species as probiotics: potentials and challenges.	3	9	1.47e-05	ENSGALP00000011319,ENSGALP00000015286,ENSGALP00000038134	TLR2-2,TLR4,TLR5
PMID:24228179	(2013) Targeting antigens to dendritic cell receptors for vaccine development.	4	41	1.48e-05	ENSGALP00000011319,ENSGALP00000035830,ENSGALP00000038134,ENSGALP00000043092	TLR2-2,TLR3,TLR4,TLR7
PMID:28487699	(2017) Network Analysis of the Systemic Response to Fasciola hepatica Infection in Sheep Reveals Changes in Fibrosis, Apoptosis, Toll-Like Receptors 34, and B Cell Function.	4	41	1.48e-05	ENSGALP00000011319,ENSGALP00000035830,ENSGALP00000042597,ENSGALP00000043092	MYD88,TLR3,TLR4,TLR7
PMID:31992286	(2020) The round goby genome provides insights into mechanisms that may facilitate biological invasions.	4	41	1.48e-05	ENSGALP00000004924,ENSGALP00000011319,ENSGALP00000015286,ENSGALP00000038134	NCOR2,TLR2-2,TLR4,TLR5
PMID:24832660	(2013) Cell-Type Specific Determinants of NRAMP1 Expression in Professional Phagocytes.	4	42	1.61e-05	ENSGALP00000011319,ENSGALP00000038134,ENSGALP00000042597,ENSGALP00000043092	MYD88,TLR2-2,TLR3,TLR4
PMID:31031749	(2019) SOCS and Herpesviruses, With Emphasis on Cytomegalovirus Retinitis.	4	42	1.61e-05	ENSGALP00000011319,ENSGALP00000038134,ENSGALP00000042597,ENSGALP00000043092	MYD88,TLR2-2,TLR3,TLR4
PMID:18978793	(2008) Toll-like receptor-induced arginase 1 in macrophages thwarts effective immunity against intracellular pathogens.	3	10	1.82e-05	ENSGALP00000011319,ENSGALP00000038134,ENSGALP00000042597	MYD88,TLR2-2,TLR4
PMID:21637683	(2009) Characterization analysis and polymorphism detection of the porcine Myd88 gene.	3	10	1.82e-05	ENSGALP00000011319,ENSGALP00000012873,ENSGALP00000043092	TLR3,TLR4,TRAF6
PMID:22105999	(2011) p53 serves as a host antiviral factor that enhances innate and adaptive immune responses to influenza A virus.	3	10	1.82e-05	ENSGALP00000038134,ENSGALP00000042597,ENSGALP00000043092	MYD88,TLR2-2,TLR3
PMID:23805294	(2013) Endotoxin Exposure during Sensitization to Blomia tropicalis Allergens Shifts TH2 Immunity Towards a TH17-Mediated Airway Neutrophilic Inflammation: Role of TLR4 and TLR2.	3	10	1.82e-05	ENSGALP00000011319,ENSGALP00000038134,ENSGALP00000042597	MYD88,TLR2-2,TLR4
PMID:24503073	(2014) Induction of innate immune response following infectious bronchitis corona virus infection in the respiratory tract of chickens.	3	10	1.82e-05	ENSGALP00000035830,ENSGALP00000038134,ENSGALP00000043092	TLR2-2,TLR3,TLR7
PMID:24968347	(2014) N-acetyl-l-cystine (NAC) protects against H9N2 swine influenza virus-induced acute lung injury.	3	10	1.82e-05	ENSGALP00000011319,ENSGALP00000042597,ENSGALP00000043092	MYD88,TLR3,TLR4
PMID:25105760	(2014) PI3KAkt signaling pathway modulates influenza virus induced mouse alveolar macrophage polarization to M1M2b.	3	10	1.82e-05	ENSGALP00000011319,ENSGALP00000015286,ENSGALP00000038134	TLR2-2,TLR4,TLR5
PMID:25973756	(2015) Brucella spp. Lumazine Synthase Induces a TLR4-Mediated Protective Response against B16 Melanoma in Mice.	3	10	1.82e-05	ENSGALP00000011319,ENSGALP00000035830,ENSGALP00000038134	TLR2-2,TLR4,TLR7
PMID:27127171	(2016) A Toll-like receptor 2 agonist-fused antigen enhanced antitumor immunity by increasing antigen presentation and the CD8 memory T cells population.	3	10	1.82e-05	ENSGALP00000011319,ENSGALP00000035830,ENSGALP00000043092	TLR3,TLR4,TLR7
PMID:28251686	(2017) E6020, a synthetic TLR4 agonist, accelerates myelin debris clearance, Schwann cell infiltration, and remyelination in the rat spinal cord.	3	10	1.82e-05	ENSGALP00000011319,ENSGALP00000038134,ENSGALP00000042597	MYD88,TLR2-2,TLR4
PMID:29316981	(2018) Host-specific differences in the response of cultured macrophages to Campylobacter jejuni capsule and O-methyl phosphoramidate mutants.	3	10	1.82e-05	ENSGALP00000011319,ENSGALP00000015286,ENSGALP00000038134	TLR2-2,TLR4,TLR5
PMID:29717152	(2018) Chicken Interferon-induced Protein with Tetratricopeptide Repeats 5 Antagonizes Replication of RNA Viruses.	3	10	1.82e-05	ENSGALP00000011319,ENSGALP00000035830,ENSGALP00000043092	TLR3,TLR4,TLR7
PMID:30196747	(2018) Toxoplasma gondii profilin does not stimulate an innate immune response through bovine or human TLR5.	3	10	1.82e-05	ENSGALP00000011319,ENSGALP00000015286,ENSGALP00000042597	MYD88,TLR4,TLR5
PMID:30620335	(2019) Immune genes are hotspots of shared positive selection across birds and mammals.	3	10	1.82e-05	ENSGALP00000015286,ENSGALP00000035830,ENSGALP00000043092	TLR3,TLR5,TLR7
PMID:21366518	(2011) Host-pathogen interactions made transparent with the zebrafish model.	4	44	1.85e-05	ENSGALP00000011319,ENSGALP00000012873,ENSGALP00000042597,ENSGALP00000043092	MYD88,TLR3,TLR4,TRAF6
PMID:31901597	(2020) Antiviral responses against chicken respiratory infections: Focus on avian influenza virus and infectious bronchitis virus.	4	44	1.85e-05	ENSGALP00000011319,ENSGALP00000035830,ENSGALP00000038134,ENSGALP00000043092	TLR2-2,TLR3,TLR4,TLR7
PMID:24762827	(2014) Innate immunity to influenza virus infection.	4	45	2.01e-05	ENSGALP00000011319,ENSGALP00000035830,ENSGALP00000042597,ENSGALP00000043092	MYD88,TLR3,TLR4,TLR7
PMID:26997034	(2016) Gene-environment interactions and the enteric nervous system: Neural plasticity and Hirschsprung disease prevention.	4	45	2.01e-05	ENSGALP00000011319,ENSGALP00000035870,ENSGALP00000038134,ENSGALP00000043092	IL7,TLR2-2,TLR3,TLR4
PMID:29315242	(2018) NF-kappaB: Two Sides of the Same Coin.	4	45	2.01e-05	ENSGALP00000011319,ENSGALP00000035830,ENSGALP00000038134,ENSGALP00000043092	TLR2-2,TLR3,TLR4,TLR7
PMID:30841905	(2019) A balanced game: chicken macrophage response to ALV-J infection.	4	45	2.01e-05	ENSGALP00000011319,ENSGALP00000013260,ENSGALP00000035830,ENSGALP00000043092	TLR15,TLR3,TLR4,TLR7
PMID:25816068	(2015) De novo transcriptomic analysis of peripheral blood lymphocytes from the Chinese goose: gene discovery and immune system pathway description.	4	46	2.16e-05	ENSGALP00000013260,ENSGALP00000038134,ENSGALP00000042597,ENSGALP00000043092	MYD88,TLR15,TLR2-2,TLR3
PMID:29657293	(2017) miR-146 and miR-155: Two Key Modulators of Immune Response and Tumor Development.	4	46	2.16e-05	ENSGALP00000011319,ENSGALP00000012873,ENSGALP00000035830,ENSGALP00000042597	MYD88,TLR4,TLR7,TRAF6
PMID:30165816	(2018) Serum amyloid A - a review.	4	46	2.16e-05	ENSGALP00000011319,ENSGALP00000038134,ENSGALP00000042597,ENSGALP00000043092	MYD88,TLR2-2,TLR3,TLR4
PMID:12515817	(2003) Flexibility of mouse classical and plasmacytoid-derived dendritic cells in directing T helper type 1 and 2 cell development: dependency on antigen dose and differential toll-like receptor ligation.	3	11	2.2e-05	ENSGALP00000011319,ENSGALP00000035830,ENSGALP00000038134	TLR2-2,TLR4,TLR7
PMID:23116495	(2012) Toll-like receptor ligands induce the expression of interferon-gamma and interleukin-17 in chicken CD4+ T cells.	3	11	2.2e-05	ENSGALP00000011319,ENSGALP00000038134,ENSGALP00000043092	TLR2-2,TLR3,TLR4
PMID:23316195	(2012) The 'sweet' side of a long pentraxin: how glycosylation affects PTX3 functions in innate immunity and inflammation.	3	11	2.2e-05	ENSGALP00000011319,ENSGALP00000038134,ENSGALP00000043092	TLR2-2,TLR3,TLR4
PMID:23555825	(2013) High yield production of influenza virus in Madin Darby canine kidney (MDCK) cells with stable knockdown of IRF7.	3	11	2.2e-05	ENSGALP00000035830,ENSGALP00000042597,ENSGALP00000043092	MYD88,TLR3,TLR7
PMID:25941767	(2015) Bioactive components in fish venoms.	3	11	2.2e-05	ENSGALP00000011319,ENSGALP00000038134,ENSGALP00000042597	MYD88,TLR2-2,TLR4
PMID:26992000	(2016) Preferential Secretion of Thymic Stromal Lymphopoietin (TSLP) by Terminally Differentiated Esophageal Epithelial Cells: Relevance to Eosinophilic Esophagitis (EoE).	3	11	2.2e-05	ENSGALP00000011319,ENSGALP00000035870,ENSGALP00000043092	IL7,TLR3,TLR4
PMID:28265270	(2017) Borrelia burgdorferi Manipulates Innate and Adaptive Immunity to Establish Persistence in Rodent Reservoir Hosts.	3	11	2.2e-05	ENSGALP00000011319,ENSGALP00000038134,ENSGALP00000042597	MYD88,TLR2-2,TLR4
PMID:28386554	(2017) Identification of IFITM1 and IFITM3 in Goose: Gene Structure, Expression Patterns, and Immune Reponses against Tembusu Virus Infection.	3	11	2.2e-05	ENSGALP00000011319,ENSGALP00000035830,ENSGALP00000043092	TLR3,TLR4,TLR7
PMID:28559881	(2017) Rodent Models of Invasive Aspergillosis due to Aspergillus fumigatus: Still a Long Path toward Standardization.	3	11	2.2e-05	ENSGALP00000011319,ENSGALP00000038134,ENSGALP00000042597	MYD88,TLR2-2,TLR4
PMID:30555234	(2018) Surface engineered polyanhydride-based oral Salmonella subunit nanovaccine for poultry.	3	11	2.2e-05	ENSGALP00000011319,ENSGALP00000015286,ENSGALP00000038134	TLR2-2,TLR4,TLR5
PMID:30809529	(2019) Promising Plant-Derived Adjuvants in the Development of Coccidial Vaccines.	3	11	2.2e-05	ENSGALP00000011319,ENSGALP00000038134,ENSGALP00000042597	MYD88,TLR2-2,TLR4
PMID:24912583	(2014) Gene co-expression network analysis identifies porcine genes associated with variation in Salmonella shedding.	4	47	2.27e-05	ENSGALP00000011319,ENSGALP00000015286,ENSGALP00000038134,ENSGALP00000042597	MYD88,TLR2-2,TLR4,TLR5
PMID:28628000	(2017) Epigenetics, inflammation and metabolism in right heart failure associated with pulmonary hypertension.	4	47	2.27e-05	ENSGALP00000011319,ENSGALP00000038134,ENSGALP00000042597,ENSGALP00000043092	MYD88,TLR2-2,TLR3,TLR4
PMID:25475706	(2014) Gene expression in the chicken caecum in response to infections with non-typhoid Salmonella.	4	48	2.45e-05	ENSGALP00000011319,ENSGALP00000013260,ENSGALP00000015286,ENSGALP00000038134	TLR15,TLR2-2,TLR4,TLR5
PMID:30012670	(2018) IL1 Receptor Antagonist Controls Transcriptional Signature of Inflammation in Patients with Metastatic Breast Cancer.	4	48	2.45e-05	ENSGALP00000011319,ENSGALP00000015286,ENSGALP00000038134,ENSGALP00000042597	MYD88,TLR2-2,TLR4,TLR5
PMID:27536558	(2016) Modulation of Host miRNAs by Intracellular Bacterial Pathogens.	4	49	2.64e-05	ENSGALP00000011319,ENSGALP00000012873,ENSGALP00000038134,ENSGALP00000042597	MYD88,TLR2-2,TLR4,TRAF6
PMID:19007808	(2009) Differential antimicrobial peptide gene expression patterns during early chicken embryological development.	3	12	2.66e-05	ENSGALP00000011319,ENSGALP00000013260,ENSGALP00000038134	TLR15,TLR2-2,TLR4
PMID:20140199	(2010) IPS-1 is essential for the control of West Nile virus infection and immunity.	3	12	2.66e-05	ENSGALP00000035830,ENSGALP00000042597,ENSGALP00000043092	MYD88,TLR3,TLR7
PMID:20692289	(2011) Synthetic double-stranded RNA oligonucleotides are immunostimulatory for chicken spleen cells.	3	12	2.66e-05	ENSGALP00000035830,ENSGALP00000042597,ENSGALP00000043092	MYD88,TLR3,TLR7
PMID:20712633	(2010) Contribution of Porphyromonas gingivalis lipopolysaccharide to periodontitis.	3	12	2.66e-05	ENSGALP00000011319,ENSGALP00000038134,ENSGALP00000042597	MYD88,TLR2-2,TLR4
PMID:21072873	(2010) TLR5 or NLRC4 is necessary and sufficient for promotion of humoral immunity by flagellin.	3	12	2.66e-05	ENSGALP00000011319,ENSGALP00000015286,ENSGALP00000042597	MYD88,TLR4,TLR5
PMID:21450279	(2011) All-trans-retinoic acid and Erk12 signaling synergistically regulate the expression of CD300B in human monocytic cells.	3	12	2.66e-05	ENSGALP00000011319,ENSGALP00000035830,ENSGALP00000043092	TLR3,TLR4,TLR7
PMID:22511847	(2012) High-mobility group box 1 protein is implicated in advanced glycation end products-induced vascular endothelial growth factor A production in the rat retinal ganglion cell line RGC-5.	3	12	2.66e-05	ENSGALP00000011319,ENSGALP00000038134,ENSGALP00000042597	MYD88,TLR2-2,TLR4
PMID:22613074	(2012) Enhanced susceptibility to lipopolysaccharide-induced arthritis and endotoxin shock in interleukin-32 alpha transgenic mice through induction of tumor necrosis factor alpha.	3	12	2.66e-05	ENSGALP00000011319,ENSGALP00000038134,ENSGALP00000042597	MYD88,TLR2-2,TLR4
PMID:23029192	(2012) A polymeric protein induces specific cytotoxicity in a TLR4 dependent manner in the absence of adjuvants.	3	12	2.66e-05	ENSGALP00000011319,ENSGALP00000035830,ENSGALP00000035870	IL7,TLR4,TLR7
PMID:24345804	(2014) Hypertrophy of infected Peyer's patches arises from global, interferon-receptor, and CD69-independent shutdown of lymphocyte egress.	3	12	2.66e-05	ENSGALP00000023991,ENSGALP00000035830,ENSGALP00000035870	IL7,ITGA2,TLR7
PMID:24394214	(2014) Analysis of the toll-like receptor 2-2 (TLR2-2) and TLR4 mRNA expression in the intestinal mucosal immunity of broilers fed on diets supplemented with nickel chloride.	3	12	2.66e-05	ENSGALP00000011319,ENSGALP00000038134,ENSGALP00000042597	MYD88,TLR2-2,TLR4
PMID:25751136	(2015) TLR9 signalling in microglia attenuates seizure-induced aberrant neurogenesis in the adult hippocampus.	3	12	2.66e-05	ENSGALP00000011319,ENSGALP00000035830,ENSGALP00000038134	TLR2-2,TLR4,TLR7
PMID:26367307	(2015) Toll-like receptor 4 signaling: A common pathway for interactions between prooxidants and extracellular disulfide high mobility group box 1 (HMGB1) protein-coupled activation.	3	12	2.66e-05	ENSGALP00000011319,ENSGALP00000015286,ENSGALP00000038134	TLR2-2,TLR4,TLR5
PMID:28024856	(2017) Newcastle disease vaccines-A solved problem or a continuous challenge?	3	12	2.66e-05	ENSGALP00000011319,ENSGALP00000035830,ENSGALP00000043092	TLR3,TLR4,TLR7
PMID:28220116	(2017) CpG-ODN Shapes Alum Adjuvant Activity Signaling via MyD88 and IL-10.	3	12	2.66e-05	ENSGALP00000011319,ENSGALP00000042597,ENSGALP00000043092	MYD88,TLR3,TLR4
PMID:28438674	(2017) Current state and challenges in developing oral vaccines.	3	12	2.66e-05	ENSGALP00000011319,ENSGALP00000015286,ENSGALP00000038134	TLR2-2,TLR4,TLR5
PMID:28499553	(2017) Nasal delivery of Protollin-adjuvanted H5N1 vaccine induces enhanced systemic as well as mucosal immunity in mice.	3	12	2.66e-05	ENSGALP00000011319,ENSGALP00000038134,ENSGALP00000042597	MYD88,TLR2-2,TLR4
PMID:29192209	(2017) Mineral particles stimulate innate immunity through neutrophil extracellular traps containing HMGB1.	3	12	2.66e-05	ENSGALP00000011319,ENSGALP00000038134,ENSGALP00000043092	TLR2-2,TLR3,TLR4
PMID:29222167	(2018) Cytoplasmic Linker Protein CLIP170 Negatively Regulates TLR4 Signaling by Targeting the TLR Adaptor Protein TIRAP.	3	12	2.66e-05	ENSGALP00000011319,ENSGALP00000012873,ENSGALP00000042597	MYD88,TLR4,TRAF6
PMID:29997595	(2018) The Microbiological Memory, an Epigenetic Regulator Governing the Balance Between Good Health and Metabolic Disorders.	3	12	2.66e-05	ENSGALP00000011319,ENSGALP00000038134,ENSGALP00000042597	MYD88,TLR2-2,TLR4
PMID:30498092	(2019) The state of art of neutrophil extracellular traps in protozoan and helminthic infections.	3	12	2.66e-05	ENSGALP00000011319,ENSGALP00000038134,ENSGALP00000042597	MYD88,TLR2-2,TLR4
PMID:31080451	(2019) Pattern Recognition by Melanoma Differentiation-Associated Gene 5 (Mda5) in Teleost Fish: A Review.	3	12	2.66e-05	ENSGALP00000012873,ENSGALP00000042597,ENSGALP00000043092	MYD88,TLR3,TRAF6
PMID:31245003	(2019) Hermetia illucens larvae as a potential dietary protein source altered the microbiota and modulated mucosal immune status in the colon of finishing pigs.	3	12	2.66e-05	ENSGALP00000011319,ENSGALP00000015286,ENSGALP00000038134	TLR2-2,TLR4,TLR5
PMID:32050986	(2020) The quail genome: insights into social behaviour, seasonal biology and infectious disease response.	4	50	2.72e-05	ENSGALP00000011319,ENSGALP00000035830,ENSGALP00000038134,ENSGALP00000043092	TLR2-2,TLR3,TLR4,TLR7
PMID:18423196	(2008) Identification of oxidative stress and Toll-like receptor 4 signaling as a key pathway of acute lung injury.	3	13	3.12e-05	ENSGALP00000012873,ENSGALP00000042597,ENSGALP00000043092	MYD88,TLR3,TRAF6
PMID:18974865	(2008) Interferon-beta pretreatment of conventional and plasmacytoid human dendritic cells enhances their activation by influenza virus.	3	13	3.12e-05	ENSGALP00000011319,ENSGALP00000035830,ENSGALP00000043092	TLR3,TLR4,TLR7
PMID:19089811	(2009) Safety and efficacy of neonatal vaccination.	3	13	3.12e-05	ENSGALP00000011319,ENSGALP00000035830,ENSGALP00000043092	TLR3,TLR4,TLR7
PMID:19155512	(2009) The critical role of epithelial-derived Act1 in IL-17- and IL-25-mediated pulmonary inflammation.	3	13	3.12e-05	ENSGALP00000011319,ENSGALP00000012873,ENSGALP00000042597	MYD88,TLR4,TRAF6
PMID:19325820	(2008) Broad-spectrum drugs against viral agents.	3	13	3.12e-05	ENSGALP00000035830,ENSGALP00000042597,ENSGALP00000043092	MYD88,TLR3,TLR7
PMID:19596035	(2009) Aging is associated with a numerical and functional decline in plasmacytoid dendritic cells, whereas myeloid dendritic cells are relatively unaltered in human peripheral blood.	3	13	3.12e-05	ENSGALP00000011319,ENSGALP00000035830,ENSGALP00000038134	TLR2-2,TLR4,TLR7
PMID:19865078	(2010) Novel signaling interactions between proteinase-activated receptor 2 and Toll-like receptors in vitro and in vivo.	3	13	3.12e-05	ENSGALP00000011319,ENSGALP00000038134,ENSGALP00000043092	TLR2-2,TLR3,TLR4
PMID:20026663	(2010) Exaggerated inflammation, impaired host defense, and neuropathology in progranulin-deficient mice.	3	13	3.12e-05	ENSGALP00000011319,ENSGALP00000038134,ENSGALP00000043092	TLR2-2,TLR3,TLR4
PMID:20041145	(2009) MiR-155 induction by F. novicida but not the virulent F. tularensis results in SHIP down-regulation and enhanced pro-inflammatory cytokine response.	3	13	3.12e-05	ENSGALP00000011319,ENSGALP00000038134,ENSGALP00000042597	MYD88,TLR2-2,TLR4
PMID:21966467	(2011) Increased MDSC accumulation and Th2 biased response to influenza A virus infection in the absence of TLR7 in mice.	3	13	3.12e-05	ENSGALP00000011319,ENSGALP00000035830,ENSGALP00000043092	TLR3,TLR4,TLR7
PMID:22110409	(2011) Murine gamma herpesvirus 68 hijacks MAVS and IKKBeta to abrogate NFKB activation and antiviral cytokine production.	3	13	3.12e-05	ENSGALP00000012873,ENSGALP00000035830,ENSGALP00000042597	MYD88,TLR7,TRAF6
PMID:22438967	(2012) Epigenetic modification of TLRs in leukocytes is associated with increased susceptibility to Salmonella enteritidis in chickens.	3	13	3.12e-05	ENSGALP00000011319,ENSGALP00000015286,ENSGALP00000038134	TLR2-2,TLR4,TLR5
PMID:22567144	(2012) Trypanosoma cruzi adjuvants potentiate T cell-mediated immunity induced by a NY-ESO-1 based antitumor vaccine.	3	13	3.12e-05	ENSGALP00000011319,ENSGALP00000035830,ENSGALP00000038134	TLR2-2,TLR4,TLR7
PMID:24928429	(2014) Shape and position of the node and notochord along the bilateral plane of symmetry are regulated by cell-extracellular matrix interactions.	3	13	3.12e-05	ENSGALP00000000518,ENSGALP00000004173,ENSGALP00000012130	ITGAV,ITGB2,ITGB3
PMID:26042121	(2015) Mast cells and influenza a virus: association with allergic responses and beyond.	3	13	3.12e-05	ENSGALP00000011319,ENSGALP00000038134,ENSGALP00000043092	TLR2-2,TLR3,TLR4
PMID:28149670	(2016) Expression and Regulation of Cholecystokinin Receptor in the Chicken's Immune Organs and Cells.	3	13	3.12e-05	ENSGALP00000011319,ENSGALP00000038134,ENSGALP00000043092	TLR2-2,TLR3,TLR4
PMID:28330900	(2017) Adaptive Immune Responses to Zika Virus Are Important for Controlling Virus Infection and Preventing Infection in Brain and Testes.	3	13	3.12e-05	ENSGALP00000035830,ENSGALP00000042597,ENSGALP00000043092	MYD88,TLR3,TLR7
PMID:28829373	(2017) The TRIMendous Role of TRIMs in Virus-Host Interactions.	4	52	3.12e-05	ENSGALP00000011319,ENSGALP00000012873,ENSGALP00000035830,ENSGALP00000043092	TLR3,TLR4,TLR7,TRAF6
PMID:29979771	(2018) Innate immune functions of avian intestinal epithelial cells: Response to bacterial stimuli and localization of responding cells in the developing avian digestive tract.	3	13	3.12e-05	ENSGALP00000011319,ENSGALP00000038134,ENSGALP00000042597	MYD88,TLR2-2,TLR4
PMID:30087675	(2018) Extracellular Vesicles Secreted by Neospora caninum Are Recognized by Toll-Like Receptor 2 and Modulate Host Cell Innate Immunity Through the MAPK Signaling Pathway.	3	13	3.12e-05	ENSGALP00000011319,ENSGALP00000042597,ENSGALP00000043092	MYD88,TLR3,TLR4
PMID:30463235	(2018) Association of Candidate Genes with Response to Heat and Newcastle Disease Virus.	3	13	3.12e-05	ENSGALP00000027049,ENSGALP00000035830,ENSGALP00000043092	IL1R1,TLR3,TLR7
PMID:31182116	(2019) High-affinity peptide ligand LXY30 for targeting Alfa3Beta1 integrin in non-small cell lung cancer.	3	13	3.12e-05	ENSGALP00000000518,ENSGALP00000004173,ENSGALP00000012130	ITGAV,ITGB2,ITGB3
PMID:31919280	(2020) Innate immune receptor NOD2 mediates LGR5+ intestinal stem cell protection against ROS cytotoxicity via mitophagy stimulation.	3	13	3.12e-05	ENSGALP00000011319,ENSGALP00000015286,ENSGALP00000038134	TLR2-2,TLR4,TLR5
PMID:32099364	(2020) Oral Deliverable Mucoadhesive Chitosan-Salmonella Subunit Nanovaccine for Layer Chickens.	3	13	3.12e-05	ENSGALP00000011319,ENSGALP00000015286,ENSGALP00000038134	TLR2-2,TLR4,TLR5
PMID:17072332	(2006) Manipulation of the nuclear factor-kappaB pathway and the innate immune response by viruses.	4	53	3.23e-05	ENSGALP00000011319,ENSGALP00000012873,ENSGALP00000042597,ENSGALP00000043092	MYD88,TLR3,TLR4,TRAF6
PMID:17983666	(2008) Molecular mechanisms of primary and secondary mucosal immunity using avian infectious bronchitis virus as a model system.	4	54	3.45e-05	ENSGALP00000035830,ENSGALP00000035870,ENSGALP00000038134,ENSGALP00000043092	IL7,TLR2-2,TLR3,TLR7
PMID:27890631	(2017) Evasion of host immune defenses by human papillomavirus.	4	54	3.45e-05	ENSGALP00000035830,ENSGALP00000038134,ENSGALP00000042597,ENSGALP00000043092	MYD88,TLR2-2,TLR3,TLR7
PMID:20413095	(2010) A pathobiont of the microbiota balances host colonization and intestinal inflammation.	3	14	3.6e-05	ENSGALP00000011319,ENSGALP00000015286,ENSGALP00000043092	TLR3,TLR4,TLR5
PMID:21249125	(2011) Macrophage activation and differentiation signals regulate schlafen-4 gene expression: evidence for Schlafen-4 as a modulator of myelopoiesis.	3	14	3.6e-05	ENSGALP00000011319,ENSGALP00000042597,ENSGALP00000043092	MYD88,TLR3,TLR4
PMID:21696367	(2011) Autotaxin induces lung epithelial cell migration through lysoPLD activity-dependent and -independent pathways.	3	14	3.6e-05	ENSGALP00000000518,ENSGALP00000004173,ENSGALP00000012130	ITGAV,ITGB2,ITGB3
PMID:22027189	(2011) Induction and evasion of type I interferon responses by influenza viruses.	3	14	3.6e-05	ENSGALP00000035830,ENSGALP00000042597,ENSGALP00000043092	MYD88,TLR3,TLR7
PMID:22110181	(2011) Learning vaccinology from viral infections.	3	14	3.6e-05	ENSGALP00000011319,ENSGALP00000035830,ENSGALP00000043092	TLR3,TLR4,TLR7
PMID:22966002	(2012) Extrafollicular B cell activation by marginal zone dendritic cells drives T cell-dependent antibody responses.	3	14	3.6e-05	ENSGALP00000015286,ENSGALP00000035830,ENSGALP00000043092	TLR3,TLR5,TLR7
PMID:23764548	(2013) Enter at your own risk: how enteroviruses navigate the dangerous world of pattern recognition receptor signaling.	3	14	3.6e-05	ENSGALP00000011319,ENSGALP00000035830,ENSGALP00000043092	TLR3,TLR4,TLR7
PMID:24066174	(2013) Campylobacter jejuni colonization is associated with a dysbiosis in the cecal microbiota of mice in the absence of prominent inflammation.	3	14	3.6e-05	ENSGALP00000011319,ENSGALP00000015286,ENSGALP00000038134	TLR2-2,TLR4,TLR5
PMID:24801069	(2014) Toxoplasma gondii 70 kDa heat shock protein: systemic detection is associated with the death of the parasites by the immune response and its increased expression in the brain is associated with parasite replication.	3	14	3.6e-05	ENSGALP00000011319,ENSGALP00000038134,ENSGALP00000042597	MYD88,TLR2-2,TLR4
PMID:26561503	(2015) Animal models to study acute and chronic intestinal inflammation in mammals.	3	14	3.6e-05	ENSGALP00000011319,ENSGALP00000042597,ENSGALP00000043092	MYD88,TLR3,TLR4
PMID:26565602	(2016) Roles and relevance of mast cells in infection and vaccination.	3	14	3.6e-05	ENSGALP00000011319,ENSGALP00000015286,ENSGALP00000035830	TLR4,TLR5,TLR7
PMID:26655241	(2016) Pathogenicity and tissue tropism of infectious bronchitis virus is associated with elevated apoptosis and innate immune responses.	3	14	3.6e-05	ENSGALP00000035830,ENSGALP00000038134,ENSGALP00000043092	TLR2-2,TLR3,TLR7
PMID:26962947	(2016) Bacterial Peptidoglycan Traverses the Placenta to Induce Fetal Neuroproliferation and Aberrant Postnatal Behavior	3	14	3.6e-05	ENSGALP00000011319,ENSGALP00000038134,ENSGALP00000042597	MYD88,TLR2-2,TLR4
PMID:28436457	(2017) Fasciola hepatica glycoconjugates immuneregulate dendritic cells through the Dendritic Cell-Specific Intercellular adhesion molecule-3-Grabbing Non-integrin inducing T cell anergy.	3	14	3.6e-05	ENSGALP00000011319,ENSGALP00000035870,ENSGALP00000038134	IL7,TLR2-2,TLR4
PMID:28792466	(2017) Distinctive Responses in an In Vitro Human Dendritic Cell-Based System upon Stimulation with Different Influenza Vaccine Formulations.	3	14	3.6e-05	ENSGALP00000011319,ENSGALP00000035830,ENSGALP00000042597	MYD88,TLR4,TLR7
PMID:29624470	(2018) Noninvasive vaccination against infectious diseases.	3	14	3.6e-05	ENSGALP00000035830,ENSGALP00000042597,ENSGALP00000043092	MYD88,TLR3,TLR7
PMID:29668825	(2018) Cryptococcal pathogenic mechanisms: a dangerous trip from the environment to the brain.	3	14	3.6e-05	ENSGALP00000011319,ENSGALP00000038134,ENSGALP00000042597	MYD88,TLR2-2,TLR4
PMID:29885376	(2018) MPL and CpG combination adjuvants promote homologous and heterosubtypic cross protection of inactivated split influenza virus vaccine.	3	14	3.6e-05	ENSGALP00000011319,ENSGALP00000035830,ENSGALP00000042597	MYD88,TLR4,TLR7
PMID:30635240	(2019) The Nucleotide Sensor ZBP1 and Kinase RIPK3 Induce the Enzyme IRG1 to Promote an Antiviral Metabolic State in Neurons.	3	14	3.6e-05	ENSGALP00000035830,ENSGALP00000042597,ENSGALP00000043092	MYD88,TLR3,TLR7
PMID:31266174	(2019) Relevance of Receptor for Advanced Glycation end Products (RAGE) in Murine Antibody-Mediated Autoimmune Diseases.	3	14	3.6e-05	ENSGALP00000011319,ENSGALP00000035830,ENSGALP00000038134	TLR2-2,TLR4,TLR7
PMID:17724133	(2007) MyD88-5 links mitochondria, microtubules, and JNK3 in neurons and regulates neuronal survival.	3	15	4.17e-05	ENSGALP00000011319,ENSGALP00000038134,ENSGALP00000043092	TLR2-2,TLR3,TLR4
PMID:18027253	(2007) Animal models: an important tool in mycology.	3	15	4.17e-05	ENSGALP00000011319,ENSGALP00000038134,ENSGALP00000042597	MYD88,TLR2-2,TLR4
PMID:19557199	(2009) Virus and host determinants of West Nile virus pathogenesis.	3	15	4.17e-05	ENSGALP00000035830,ENSGALP00000042597,ENSGALP00000043092	MYD88,TLR3,TLR7
PMID:20639485	(2010) Comparison of OX40 ligand and CD70 in the promotion of CD4+ T cell responses.	3	15	4.17e-05	ENSGALP00000035830,ENSGALP00000042597,ENSGALP00000043092	MYD88,TLR3,TLR7
PMID:21263462	(2011) Ebolavirus VP35 suppresses IFN production from conventional but not plasmacytoid dendritic cells.	3	15	4.17e-05	ENSGALP00000035830,ENSGALP00000042597,ENSGALP00000043092	MYD88,TLR3,TLR7
PMID:22292031	(2012) Plasmid-cured Chlamydia caviae activates TLR2-dependent signaling and retains virulence in the guinea pig model of genital tract infection.	3	15	4.17e-05	ENSGALP00000011319,ENSGALP00000038134,ENSGALP00000042597	MYD88,TLR2-2,TLR4
PMID:25140174	(2014) Thalassophryne nattereri fish venom: from the envenoming to the understanding of the immune system.	3	15	4.17e-05	ENSGALP00000011319,ENSGALP00000038134,ENSGALP00000042597	MYD88,TLR2-2,TLR4
PMID:25589066	(2015) High-mobility group box 1: a novel target for treatment of Pseudomonas aeruginosa keratitis.	3	15	4.17e-05	ENSGALP00000011319,ENSGALP00000038134,ENSGALP00000043092	TLR2-2,TLR3,TLR4
PMID:25678267	(2015) Influenza virus activation of the interferon system.	3	15	4.17e-05	ENSGALP00000035830,ENSGALP00000042597,ENSGALP00000043092	MYD88,TLR3,TLR7
PMID:26004263	(2015) Infection and Atherosclerosis Development.	3	15	4.17e-05	ENSGALP00000011319,ENSGALP00000038134,ENSGALP00000042597	MYD88,TLR2-2,TLR4
PMID:26090808	(2015) Ginseng Berry Extract Promotes Maturation of Mouse Dendritic Cells.	3	15	4.17e-05	ENSGALP00000011319,ENSGALP00000038134,ENSGALP00000042597	MYD88,TLR2-2,TLR4
PMID:27683641	(....) Chicken gga-miR-19a Targets ZMYND11 and Plays an Important Role in Host Defense against Mycoplasma gallisepticum (HS Strain) Infection.	3	15	4.17e-05	ENSGALP00000012873,ENSGALP00000038134,ENSGALP00000042597	MYD88,TLR2-2,TRAF6
PMID:28123316	(2017) Animal lectins: potential receptors for ginseng polysaccharides.	3	15	4.17e-05	ENSGALP00000011319,ENSGALP00000038134,ENSGALP00000042597	MYD88,TLR2-2,TLR4
PMID:29740430	(2018) Multilayer Control of B Cell Activation by the B Cell Antigen Receptor: Following Themes Initiated With Bill Paul.	3	15	4.17e-05	ENSGALP00000024180,ENSGALP00000035830,ENSGALP00000042597	FYN,MYD88,TLR7
PMID:30445683	(2018) Enhancing Protective Efficacy of Poultry Vaccines through Targeted Delivery of Antigens to Antigen-Presenting Cells.	3	15	4.17e-05	ENSGALP00000015286,ENSGALP00000038134,ENSGALP00000043092	TLR2-2,TLR3,TLR5
PMID:31028244	(2019) A cell-penetrating peptide blocks Toll-like receptor-mediated downstream signaling and ameliorates autoimmune and inflammatory diseases in mice.	3	15	4.17e-05	ENSGALP00000035830,ENSGALP00000038134,ENSGALP00000043092	TLR2-2,TLR3,TLR7
PMID:31379771	(2019) The Mechanisms of Disease Caused by Acinetobacter baumannii.	3	15	4.17e-05	ENSGALP00000011319,ENSGALP00000038134,ENSGALP00000042597	MYD88,TLR2-2,TLR4
PMID:31555241	(2019) Computational Network Analysis Identifies Evolutionarily Conserved miRNA Gene Interactions Potentially Regulating Immune Response in Bovine Trypanosomosis.	3	15	4.17e-05	ENSGALP00000011319,ENSGALP00000038134,ENSGALP00000042597	MYD88,TLR2-2,TLR4
PMID:32070432	(2020) High-mobility group box 1 protein (HMGB1) from Cherry Valley duck mediates signaling pathways and antiviral activity.	3	15	4.17e-05	ENSGALP00000011319,ENSGALP00000038134,ENSGALP00000043092	TLR2-2,TLR3,TLR4
PMID:26106387	(2015) Pathogenesis of Systemic Sclerosis.	5	134	4.27e-05	ENSGALP00000011319,ENSGALP00000015286,ENSGALP00000035830,ENSGALP00000038134,ENSGALP00000043092	TLR2-2,TLR3,TLR4,TLR5,TLR7
PMID:20501938	(2010) TRAF6 and A20 regulate lysine 63-linked ubiquitination of Beclin-1 to control TLR4-induced autophagy.	3	16	4.78e-05	ENSGALP00000011319,ENSGALP00000012873,ENSGALP00000042597	MYD88,TLR4,TRAF6
PMID:20799951	(2010) Leucine-rich repeat protein PRAME: expression, potential functions and clinical implications for leukaemia.	3	16	4.78e-05	ENSGALP00000004924,ENSGALP00000011319,ENSGALP00000043092	NCOR2,TLR3,TLR4
PMID:20800114	(2010) HMGB1-derived peptide acts as adjuvant inducing immune responses to peptide and protein antigen.	3	16	4.78e-05	ENSGALP00000011319,ENSGALP00000042597,ENSGALP00000043092	MYD88,TLR3,TLR4
PMID:21569810	(2011) Maturation of human dendritic cells with Saccharomyces cerevisiae (yeast) reduces the number and function of regulatory T cells and enhances the ratio of antigen-specific effectors to regulatory T cells.	3	16	4.78e-05	ENSGALP00000011319,ENSGALP00000035870,ENSGALP00000038134	IL7,TLR2-2,TLR4
PMID:21893432	(2011) Toxoplasma gondii effectors are master regulators of the inflammatory response.	3	16	4.78e-05	ENSGALP00000011319,ENSGALP00000012873,ENSGALP00000043092	TLR3,TLR4,TRAF6
PMID:22156492	(2012) Regulatory T cells enhance mast cell production of IL-6 via surface-bound TGF-Beta.	3	16	4.78e-05	ENSGALP00000011319,ENSGALP00000012873,ENSGALP00000038134	TLR2-2,TLR4,TRAF6
PMID:22224775	(2012) VLR-based adaptive immunity.	3	16	4.78e-05	ENSGALP00000035830,ENSGALP00000035870,ENSGALP00000038134	IL7,TLR2-2,TLR7
PMID:22482039	(2012) The biological significance of evolution in autoimmune phenomena.	3	16	4.78e-05	ENSGALP00000011319,ENSGALP00000035830,ENSGALP00000043092	TLR3,TLR4,TLR7
PMID:23209826	(2012) HMGB in mollusk Crassostrea ariakensis Gould: structure, pro-inflammatory cytokine function characterization and anti-infection role of its antibody.	3	16	4.78e-05	ENSGALP00000011319,ENSGALP00000038134,ENSGALP00000042597	MYD88,TLR2-2,TLR4
PMID:23965627	(2013) Bacteria activate sensory neurons that modulate pain and inflammation.	3	16	4.78e-05	ENSGALP00000038134,ENSGALP00000042597,ENSGALP00000043092	MYD88,TLR2-2,TLR3
PMID:24144321	(2014) From mechanosensitivity to inflammatory responses: new players in the pathology of glaucoma.	3	16	4.78e-05	ENSGALP00000011319,ENSGALP00000042597,ENSGALP00000043092	MYD88,TLR3,TLR4
PMID:24171052	(2013) The role of vitamin d in autoimmune hepatitis.	3	16	4.78e-05	ENSGALP00000011319,ENSGALP00000038134,ENSGALP00000043092	TLR2-2,TLR3,TLR4
PMID:25369126	(2014) Toll-like receptor responses to Peste des petits ruminants virus in goats and water buffalo.	3	16	4.78e-05	ENSGALP00000011319,ENSGALP00000035830,ENSGALP00000043092	TLR3,TLR4,TLR7
PMID:26231118	(2015) MyD88 Adaptor-Dependent Microbial Sensing by Regulatory T Cells Promotes Mucosal Tolerance and Enforces Commensalism.	3	16	4.78e-05	ENSGALP00000027049,ENSGALP00000038134,ENSGALP00000042597	IL1R1,MYD88,TLR2-2
PMID:27179743	(2016) The Dual Complexity of PTX3 in Health and Disease: A Balancing Act?	3	16	4.78e-05	ENSGALP00000011319,ENSGALP00000038134,ENSGALP00000042597	MYD88,TLR2-2,TLR4
PMID:27437481	(2014) The Dynamic Interactions between Salmonella and the Microbiota, within the Challenging Niche of the Gastrointestinal Tract.	3	16	4.78e-05	ENSGALP00000011319,ENSGALP00000015286,ENSGALP00000042597	MYD88,TLR4,TLR5
PMID:28725219	(2017) Gut Microbiota Co-microevolution with Selection for Host Humoral Immunity.	3	16	4.78e-05	ENSGALP00000011319,ENSGALP00000038134,ENSGALP00000042597	MYD88,TLR2-2,TLR4
PMID:29416534	(2017) NLRC4 Inflammasome-Driven Immunogenicity of a Recombinant MVA Mucosal Vaccine Encoding Flagellin.	3	16	4.78e-05	ENSGALP00000015286,ENSGALP00000042597,ENSGALP00000043092	MYD88,TLR3,TLR5
PMID:30003075	(2018) P2RX7 Purinoceptor as a Therapeutic Target-The Second Coming?	3	16	4.78e-05	ENSGALP00000011319,ENSGALP00000038134,ENSGALP00000042597	MYD88,TLR2-2,TLR4
PMID:30060835	(2018) Host-Intrinsic Interferon Status in Infection and Immunity.	3	16	4.78e-05	ENSGALP00000011319,ENSGALP00000035830,ENSGALP00000043092	TLR3,TLR4,TLR7
PMID:31158432	(2019) Targeting microglia with lentivirus and AAV: Recent advances and remaining challenges.	3	16	4.78e-05	ENSGALP00000004173,ENSGALP00000011319,ENSGALP00000038134	ITGAV,TLR2-2,TLR4
PMID:32169119	(2020) The origin, transmission and clinical therapies on coronavirus disease 2019 (COVID-19) outbreak - an update on the status.	3	16	4.78e-05	ENSGALP00000035830,ENSGALP00000035870,ENSGALP00000042597	IL7,MYD88,TLR7
PMID:30904196	(2019) The Role of Nucleic Acid Sensing in Controlling Microbial and Autoimmune Disorders.	4	61	4.9e-05	ENSGALP00000012873,ENSGALP00000035830,ENSGALP00000042597,ENSGALP00000043092	MYD88,TLR3,TLR7,TRAF6
PMID:26861404	(2016) The Role of Gammaherpesviruses in Cancer Pathogenesis.	4	62	5.2e-05	ENSGALP00000011319,ENSGALP00000035830,ENSGALP00000038134,ENSGALP00000043092	TLR2-2,TLR3,TLR4,TLR7
PMID:18990222	(2008) Gene expression profiling in chicken heterophils with Salmonella enteritidis stimulation using a chicken 44 K Agilent microarray.	3	17	5.39e-05	ENSGALP00000011319,ENSGALP00000013260,ENSGALP00000042597	MYD88,TLR15,TLR4
PMID:19730694	(2009) Suppression of cell-mediated immunity following recognition of phagosome-confined bacteria.	3	17	5.39e-05	ENSGALP00000015286,ENSGALP00000038134,ENSGALP00000042597	MYD88,TLR2-2,TLR5
PMID:21196401	(2011) Sleep and innate immunity.	3	17	5.39e-05	ENSGALP00000011319,ENSGALP00000038134,ENSGALP00000043092	TLR2-2,TLR3,TLR4
PMID:25202303	(2014) The influence of delivery vectors on HIV vaccine efficacy.	3	17	5.39e-05	ENSGALP00000011319,ENSGALP00000015286,ENSGALP00000038134	TLR2-2,TLR4,TLR5
PMID:28393871	(2017) Long-term consumption of sugar-sweetened beverage during the growth period promotes social aggression in adult mice with proinflammatory responses in the brain.	3	17	5.39e-05	ENSGALP00000011319,ENSGALP00000035830,ENSGALP00000040720	TBXA2R,TLR4,TLR7
PMID:28754008	(2017) Combination Therapy of PEG-HM-3 and Methotrexate Retards Adjuvant-Induced Arthritis.	3	17	5.39e-05	ENSGALP00000004173,ENSGALP00000011319,ENSGALP00000038134	ITGAV,TLR2-2,TLR4
PMID:29295550	(2017) Lessons Learned from Protective Immune Responses to Optimize Vaccines against Cryptosporidiosis.	3	17	5.39e-05	ENSGALP00000011319,ENSGALP00000038134,ENSGALP00000042597	MYD88,TLR2-2,TLR4
PMID:29784935	(2018) A causal mechanism for childhood acute lymphoblastic leukaemia.	3	17	5.39e-05	ENSGALP00000011319,ENSGALP00000035830,ENSGALP00000043092	TLR3,TLR4,TLR7
PMID:30369932	(2018) Co-stimulation With TLR7 Agonist Imiquimod and Inactivated Influenza Virus Particles Promotes Mouse B Cell Activation, Differentiation, and Accelerated Antigen Specific Antibody Production.	3	17	5.39e-05	ENSGALP00000011319,ENSGALP00000035830,ENSGALP00000038134	TLR2-2,TLR4,TLR7
PMID:30463541	(2018) Transcripts of antibacterial peptides in chicken erythrocytes infected with Marek's disease virus.	3	17	5.39e-05	ENSGALP00000013260,ENSGALP00000035830,ENSGALP00000043092	TLR15,TLR3,TLR7
PMID:28636958	(2017) Protective and Pathological Immunity during Central Nervous System Infections.	4	63	5.42e-05	ENSGALP00000011319,ENSGALP00000035830,ENSGALP00000038134,ENSGALP00000043092	TLR2-2,TLR3,TLR4,TLR7
PMID:18832694	(2008) Normal development and activation but altered cytokine production of Fyn-deficient CD4+ T cells.	3	18	6.18e-05	ENSGALP00000023991,ENSGALP00000024180,ENSGALP00000041692	FYN,ITGA2,VAV1
PMID:21350488	(2011) Programming the magnitude and persistence of antibody responses with innate immunity.	3	18	6.18e-05	ENSGALP00000011319,ENSGALP00000035830,ENSGALP00000042597	MYD88,TLR4,TLR7
PMID:22240162	(2012) Outer membrane protein A and OprF: versatile roles in Gram-negative bacterial infections.	3	18	6.18e-05	ENSGALP00000011319,ENSGALP00000037001,ENSGALP00000038134	RAC2,TLR2-2,TLR4
PMID:25085878	(2014) Murine Langerin+ dermal dendritic cells prime CD8+ T cells while Langerhans cells induce cross-tolerance.	3	18	6.18e-05	ENSGALP00000035830,ENSGALP00000035870,ENSGALP00000043092	IL7,TLR3,TLR7
PMID:25346731	(2014) Salmonella enterica in the Chicken: How it has Helped Our Understanding of Immunology in a Non-Biomedical Model Species.	3	18	6.18e-05	ENSGALP00000011319,ENSGALP00000013260,ENSGALP00000015286	TLR15,TLR4,TLR5
PMID:26815999	(2016) A20 Deficiency in Lung Epithelial Cells Protects against Influenza A Virus Infection.	3	18	6.18e-05	ENSGALP00000011319,ENSGALP00000035830,ENSGALP00000043092	TLR3,TLR4,TLR7
PMID:27473856	(2016) Flavivirus NS1: a multifaceted enigmatic viral protein.	3	18	6.18e-05	ENSGALP00000011319,ENSGALP00000038134,ENSGALP00000043092	TLR2-2,TLR3,TLR4
PMID:32219102	(2020) Pathogenicity and Immune Responses of Aspergillus fumigatus Infection in Chickens.	3	18	6.18e-05	ENSGALP00000011319,ENSGALP00000038134,ENSGALP00000042597	MYD88,TLR2-2,TLR4
PMID:22216095	(2011) Deep-sequencing analysis of the mouse transcriptome response to infection with Brucella melitensis strains of differing virulence.	4	67	6.75e-05	ENSGALP00000011319,ENSGALP00000012873,ENSGALP00000035830,ENSGALP00000038134	TLR2-2,TLR4,TLR7,TRAF6
PMID:29996499	(2018) Implications of Angiogenesis Involvement in Arthritis.	4	67	6.75e-05	ENSGALP00000011319,ENSGALP00000035830,ENSGALP00000038134,ENSGALP00000043092	TLR2-2,TLR3,TLR4,TLR7
PMID:19362022	(2009) Critical regulation of early Th17 cell differentiation by interleukin-1 signaling.	3	19	7.03e-05	ENSGALP00000012873,ENSGALP00000027049,ENSGALP00000042597	IL1R1,MYD88,TRAF6
PMID:19668438	(2008) Molecular markers of susceptibility to ocular toxoplasmosis, host and guest behaving badly.	3	19	7.03e-05	ENSGALP00000011319,ENSGALP00000015286,ENSGALP00000042597	MYD88,TLR4,TLR5
PMID:20112107	(2010) Th17 cytokines and vaccine-induced immunity.	3	19	7.03e-05	ENSGALP00000011319,ENSGALP00000035830,ENSGALP00000038134	TLR2-2,TLR4,TLR7
PMID:21677749	(2011) Human nutrition, the gut microbiome and the immune system.	3	19	7.03e-05	ENSGALP00000011319,ENSGALP00000038134,ENSGALP00000042597	MYD88,TLR2-2,TLR4
PMID:22206014	(2011) The combination of early and rapid type I IFN, IL-1Alfa, and IL-1Beta production are essential mediators of RNA-like adjuvant driven CD4+ Th1 responses.	3	19	7.03e-05	ENSGALP00000035830,ENSGALP00000042597,ENSGALP00000043092	MYD88,TLR3,TLR7
PMID:22566942	(2012) Antigen Cross-Priming of Cell-Associated Proteins is Enhanced by Macroautophagy within the Antigen Donor Cell.	3	19	7.03e-05	ENSGALP00000011319,ENSGALP00000035830,ENSGALP00000038134	TLR2-2,TLR4,TLR7
PMID:23731466	(2013) Microarray analysis of microRNA expression in peripheral blood mononuclear cells of critically ill patients with influenza A (H1N1).	3	19	7.03e-05	ENSGALP00000011319,ENSGALP00000042597,ENSGALP00000043092	MYD88,TLR3,TLR4
PMID:24011356	(2013) Identification of novel integrin binding partners for calcium and integrin binding protein 1 (CIB1): structural and thermodynamic basis of CIB1 promiscuity.	3	19	7.03e-05	ENSGALP00000000518,ENSGALP00000004173,ENSGALP00000012130	ITGAV,ITGB2,ITGB3
PMID:26393920	(2015) Transcriptomic and Epigenetic Profiling of the Lung of Influenza-Infected Pigs: A Comparison of Different Birth Weight and Susceptibility Groups.	4	68	7.03e-05	ENSGALP00000012130,ENSGALP00000035830,ENSGALP00000038134,ENSGALP00000043092	ITGB2,TLR2-2,TLR3,TLR7
PMID:26965188	(2016) Alfav Integrins combine with LC3 and atg5 to regulate Toll-like receptor signalling in B cells.	3	19	7.03e-05	ENSGALP00000011319,ENSGALP00000035830,ENSGALP00000042597	MYD88,TLR4,TLR7
PMID:30373170	(2018) Immunomodulators Inspired by Nature: A Review on Curcumin and Echinacea.	3	19	7.03e-05	ENSGALP00000011319,ENSGALP00000015286,ENSGALP00000042597	MYD88,TLR4,TLR5
PMID:31888082	(2019) A New Vision of IgA Nephropathy: The Missing Link.	3	19	7.03e-05	ENSGALP00000041692,ENSGALP00000042597,ENSGALP00000043092	MYD88,TLR3,VAV1
PMID:32055228	(2019) Effects of Salmonella enteritidis Vaccination on the Expression of Innate Immune Molecules and Histone Modifications in the Follicular Theca of Laying Hens.	3	19	7.03e-05	ENSGALP00000011319,ENSGALP00000013260,ENSGALP00000038134	TLR15,TLR2-2,TLR4
PMID:28620097	(2018) Interleukin 17 Family Cytokines: Signaling Mechanisms, Biological Activities, and Therapeutic Implications.	4	69	7.36e-05	ENSGALP00000012873,ENSGALP00000015286,ENSGALP00000035830,ENSGALP00000038134	TLR2-2,TLR5,TLR7,TRAF6
PMID:20818395	(2010) Caspase-12 controls West Nile virus infection via the viral RNA receptor RIG-I.	3	20	7.9e-05	ENSGALP00000012873,ENSGALP00000035830,ENSGALP00000043092	TLR3,TLR7,TRAF6
PMID:21790942	(2011) Innate immune control of West Nile virus infection.	3	20	7.9e-05	ENSGALP00000035830,ENSGALP00000042597,ENSGALP00000043092	MYD88,TLR3,TLR7
PMID:22705178	(2012) Dendritic cell populations with different concentrations of lipid regulate tolerance and immunity in mouse and human liver.	3	20	7.9e-05	ENSGALP00000011319,ENSGALP00000035830,ENSGALP00000038134	TLR2-2,TLR4,TLR7
PMID:23589715	(2013) The role of vitamin d in primary biliary cirrhosis: possible genetic and cell signaling mechanisms.	3	20	7.9e-05	ENSGALP00000011319,ENSGALP00000038134,ENSGALP00000043092	TLR2-2,TLR3,TLR4
PMID:24319098	(2014) A missense mutation in ITGB6 causes pitted hypomineralized amelogenesis imperfecta.	3	20	7.9e-05	ENSGALP00000000518,ENSGALP00000004173,ENSGALP00000012130	ITGAV,ITGB2,ITGB3
PMID:24330678	(2013) Cell adhesion and intracellular calcium signaling in neurons.	3	20	7.9e-05	ENSGALP00000000518,ENSGALP00000012130,ENSGALP00000024180	FYN,ITGB2,ITGB3
PMID:25242040	(2014) Mesodermal expression of integrin Alfa5Beta1 regulates neural crest development and cardiovascular morphogenesis.	3	20	7.9e-05	ENSGALP00000000518,ENSGALP00000004173,ENSGALP00000012130	ITGAV,ITGB2,ITGB3
PMID:26557038	(2015) Cathelicidin impact on inflammatory cells.	3	20	7.9e-05	ENSGALP00000011319,ENSGALP00000015286,ENSGALP00000043092	TLR3,TLR4,TLR5
PMID:26664943	(2015) Identification of Potential Biomarkers for Gut Barrier Failure in Broiler Chickens.	3	20	7.9e-05	ENSGALP00000011319,ENSGALP00000038134,ENSGALP00000043092	TLR2-2,TLR3,TLR4
PMID:29141870	(2017) IgBeta ubiquitination activates PI3K signals required for endosomal sorting.	3	20	7.9e-05	ENSGALP00000035830,ENSGALP00000041692,ENSGALP00000042597	MYD88,TLR7,VAV1
PMID:29149896	(2017) Liposomal vaccine formulations as prophylactic agents: design considerations for modern vaccines.	3	20	7.9e-05	ENSGALP00000011319,ENSGALP00000035830,ENSGALP00000043092	TLR3,TLR4,TLR7
PMID:29848176	(2018) The second and third amino acids of Pam2 lipopeptides are key for the proliferation of cytotoxic T cells.	3	20	7.9e-05	ENSGALP00000038134,ENSGALP00000042597,ENSGALP00000043092	MYD88,TLR2-2,TLR3
PMID:31623188	(2019) Adjuvant Strategies for Lactic Acid Bacterial Mucosal Vaccines.	3	20	7.9e-05	ENSGALP00000015286,ENSGALP00000042597,ENSGALP00000043092	MYD88,TLR3,TLR5
PMID:31775046	(2019) IL-12 Blocks Tfh Cell Differentiation during Salmonella Infection, thereby Contributing to Germinal Center Suppression.	3	20	7.9e-05	ENSGALP00000011319,ENSGALP00000023991,ENSGALP00000042597	ITGA2,MYD88,TLR4
PMID:18341708	(2008) Innate recognition of non-self nucleic acids.	3	21	8.83e-05	ENSGALP00000035830,ENSGALP00000042597,ENSGALP00000043092	MYD88,TLR3,TLR7
PMID:18703349	(2008) Negative regulation of cytoplasmic RNA-mediated antiviral signaling.	3	21	8.83e-05	ENSGALP00000035830,ENSGALP00000038134,ENSGALP00000043092	TLR2-2,TLR3,TLR7
PMID:21698224	(2011) Induction of Noxa-mediated apoptosis by modified vaccinia virus Ankara depends on viral recognition by cytosolic helicases, leading to IRF-3IFN-Beta-dependent induction of pro-apoptotic Noxa.	3	21	8.83e-05	ENSGALP00000035830,ENSGALP00000042597,ENSGALP00000043092	MYD88,TLR3,TLR7
PMID:24238922	(2013) Innate immune mechanisms in vitiligo: danger from within.	3	21	8.83e-05	ENSGALP00000011319,ENSGALP00000035830,ENSGALP00000038134	TLR2-2,TLR4,TLR7
PMID:27805901	(2016) RING finger E3 ligase PPP1R11 regulates TLR2 signaling and innate immunity.	3	21	8.83e-05	ENSGALP00000035830,ENSGALP00000042597,ENSGALP00000043092	MYD88,TLR3,TLR7
PMID:27846843	(2016) Strong inflammatory responses and apoptosis in the oviducts of egg-laying hens caused by genotype VIId Newcastle disease virus.	3	21	8.83e-05	ENSGALP00000035830,ENSGALP00000042597,ENSGALP00000043092	MYD88,TLR3,TLR7
PMID:32063900	(2019) Isolation and Selection of Duck Primary Cells as Pathogenic and Innate Immunologic Cell Models for Duck Plague Virus.	3	21	8.83e-05	ENSGALP00000011319,ENSGALP00000038134,ENSGALP00000043092	TLR2-2,TLR3,TLR4
PMID:22401171	(2012) NLRC5 knockdown in chicken macrophages alters response to LPS and poly (I:C) stimulation.	3	22	9.92e-05	ENSGALP00000011319,ENSGALP00000042597,ENSGALP00000043092	MYD88,TLR3,TLR4
PMID:22704338	(2011) Transcriptional modulation by VIP: a rational target against inflammatory disease.	3	22	9.92e-05	ENSGALP00000011319,ENSGALP00000038134,ENSGALP00000042597	MYD88,TLR2-2,TLR4
PMID:23221473	(2012) Use and abuse of dendritic cells by Toxoplasma gondii.	3	22	9.92e-05	ENSGALP00000011319,ENSGALP00000038134,ENSGALP00000042597	MYD88,TLR2-2,TLR4
PMID:27267361	(2016) Kinetics of the West Nile virus induced transcripts of selected cytokines and Toll-like receptors in equine peripheral blood mononuclear cells.	3	22	9.92e-05	ENSGALP00000035830,ENSGALP00000042597,ENSGALP00000043092	MYD88,TLR3,TLR7
PMID:27932299	(2017) Provisional matrix: A role for versican and hyaluronan.	3	22	9.92e-05	ENSGALP00000011319,ENSGALP00000038134,ENSGALP00000042597	MYD88,TLR2-2,TLR4
PMID:28154565	(2017) Protozoan Parasites and Type I IFNs.	3	22	9.92e-05	ENSGALP00000011319,ENSGALP00000023991,ENSGALP00000042597	ITGA2,MYD88,TLR4
PMID:29698474	(2018) Interferon induced protein 35 exacerbates H5N1 influenza disease through the expression of IL-12p40 homodimer.	3	22	9.92e-05	ENSGALP00000011319,ENSGALP00000035830,ENSGALP00000043092	TLR3,TLR4,TLR7
PMID:31076577	(2019) Conserved, breed-dependent, and subline-dependent innate immune responses of Fayoumi and Leghorn chicken embryos to Newcastle disease virus infection.	3	22	9.92e-05	ENSGALP00000015286,ENSGALP00000042597,ENSGALP00000043092	MYD88,TLR3,TLR5
PMID:31779230	(2019) The Genus Allium as Poultry Feed Additive: A Review.	3	22	9.92e-05	ENSGALP00000011319,ENSGALP00000035830,ENSGALP00000038134	TLR2-2,TLR4,TLR7
PMID:28802037	(2017) The PI3K Pathway in Human Disease.	4	76	0.0001	ENSGALP00000011319,ENSGALP00000015286,ENSGALP00000035830,ENSGALP00000038134	TLR2-2,TLR4,TLR5,TLR7
PMID:19812203	(2009) The gene history of zebrafish tlr4a and tlr4b is predictive of their divergent functions.	3	23	0.00011	ENSGALP00000012873,ENSGALP00000042597,ENSGALP00000043092	MYD88,TLR3,TRAF6
PMID:23421931	(2013) Influenza A virus-mediated priming enhances cytokine secretion by human dendritic cells infected with Streptococcus pneumoniae.	3	23	0.00011	ENSGALP00000011319,ENSGALP00000035830,ENSGALP00000043092	TLR3,TLR4,TLR7
PMID:25958271	(2015) Evolution of two prototypic T cell lineages.	3	23	0.00011	ENSGALP00000035830,ENSGALP00000038134,ENSGALP00000043092	TLR2-2,TLR3,TLR7
PMID:28856739	(2017) Deciphering interactions between the gut microbiota and the immune system via microbial cultivation and minimal microbiomes.	3	23	0.00011	ENSGALP00000011319,ENSGALP00000038134,ENSGALP00000042597	MYD88,TLR2-2,TLR4
PMID:29158474	(2017) UNC93B1 interacts with the calcium sensor STIM1 for efficient antigen cross-presentation in dendritic cells.	3	23	0.00011	ENSGALP00000011319,ENSGALP00000037001,ENSGALP00000043092	RAC2,TLR3,TLR4
PMID:29802339	(2018) Anti-inflammatory effects of heat-killed Lactobacillus plantarum L-137 on cardiac and adipose tissue in rats with metabolic syndrome.	3	23	0.00011	ENSGALP00000011319,ENSGALP00000038134,ENSGALP00000043092	TLR2-2,TLR3,TLR4
PMID:31708934	(2019) Bordeaux 2018: Wine, Cheese, and gammadelta T Cells.	3	23	0.00011	ENSGALP00000011319,ENSGALP00000035870,ENSGALP00000042597	IL7,MYD88,TLR4
PMID:21909274	(2011) Interferon regulatory factor-1 (IRF-1) shapes both innate and CD8(+) T cell immune responses against West Nile virus infection.	3	24	0.00012	ENSGALP00000035830,ENSGALP00000042597,ENSGALP00000043092	MYD88,TLR3,TLR7
PMID:23338238	(2013) Spatial coupling of JNK activation to the B cell antigen receptor by tyrosine-phosphorylated ezrin.	3	24	0.00012	ENSGALP00000011319,ENSGALP00000024180,ENSGALP00000041692	FYN,TLR4,VAV1
PMID:25688334	(2015) Mechanisms of Translocation of ER Chaperones to the Cell Surface and Immunomodulatory Roles in Cancer and Autoimmunity.	3	24	0.00012	ENSGALP00000011319,ENSGALP00000038134,ENSGALP00000042597	MYD88,TLR2-2,TLR4
PMID:26567920	(2015) IL-15 functions as a danger signal to regulate tissue-resident T cells and tissue destruction.	3	24	0.00012	ENSGALP00000011319,ENSGALP00000035870,ENSGALP00000042597	IL7,MYD88,TLR4
PMID:28704394	(2017) Genome wide host gene expression analysis in mice experimentally infected with Pasteurella multocida.	4	80	0.00012	ENSGALP00000011319,ENSGALP00000012873,ENSGALP00000035870,ENSGALP00000042597	IL7,MYD88,TLR4,TRAF6
PMID:28910325	(2017) Src- and Fyn-dependent apical membrane trafficking events control endothelial lumen formation during vascular tube morphogenesis.	3	24	0.00012	ENSGALP00000016120,ENSGALP00000024180,ENSGALP00000037001	FYN,RAC2,RAP1B
PMID:29312537	(2017) Lipopolysaccharide induces acute bursal atrophy in broiler chicks by activating TLR4-MAPK-NF-KBAP-1 signaling.	3	24	0.00012	ENSGALP00000011319,ENSGALP00000038134,ENSGALP00000042597	MYD88,TLR2-2,TLR4
PMID:21622263	(2011) Neural stem cell niches: roles for the hyaluronan-based extracellular matrix.	3	25	0.00014	ENSGALP00000011319,ENSGALP00000038134,ENSGALP00000042597	MYD88,TLR2-2,TLR4
PMID:27912060	(2016) The Hippo Pathway Kinases LATS12 Suppress Cancer Immunity.	3	25	0.00014	ENSGALP00000011319,ENSGALP00000035830,ENSGALP00000042597	MYD88,TLR4,TLR7
PMID:29578037	(2018) Cocaine evokes a profile of oxidative stress and impacts innate antiviral response pathways in astrocytes.	3	25	0.00014	ENSGALP00000011319,ENSGALP00000035830,ENSGALP00000043092	TLR3,TLR4,TLR7
PMID:29915592	(2018) Neonatal Immunity, Respiratory Virus Infections, and the Development of Asthma.	3	25	0.00014	ENSGALP00000011319,ENSGALP00000035830,ENSGALP00000042597	MYD88,TLR4,TLR7
PMID:30104534	(2018) Computational Molecular Docking and X-ray Crystallographic Studies of Catechins in New Drug Design Strategies.	3	25	0.00014	ENSGALP00000011319,ENSGALP00000012873,ENSGALP00000024180	FYN,TLR4,TRAF6
PMID:16495540	(2006) Induction of a novel chicken Toll-like receptor following Salmonella enterica serovar Typhimurium infection.	2	2	0.00015	ENSGALP00000013260,ENSGALP00000038134	TLR15,TLR2-2
PMID:17964652	(2008) Functional characterization of chicken TLR5 reveals species-specific recognition of flagellin.	2	2	0.00015	ENSGALP00000015286,ENSGALP00000042597	MYD88,TLR5
PMID:18559428	(2008) Alterations of splenic architecture in malaria are induced independently of Toll-like receptors 2, 4, and 9 or MyD88 and may affect antibody affinity.	2	2	0.00015	ENSGALP00000011319,ENSGALP00000042597	MYD88,TLR4
PMID:19436601	(2009) Development of mucosal adjuvants for intranasal vaccine for H5N1 influenza viruses.	2	2	0.00015	ENSGALP00000035830,ENSGALP00000043092	TLR3,TLR7
PMID:21239391	(2011) Molecular evolution of the toll-like receptor multigene family in birds.	2	2	0.00015	ENSGALP00000013260,ENSGALP00000015286	TLR15,TLR5
PMID:21929369	(2012) Toll-like receptor 7 ligands inhibit influenza A infection in chickens.	2	2	0.00015	ENSGALP00000035830,ENSGALP00000043092	TLR3,TLR7
PMID:22051890	(2011) Vaccines for the twenty-first century society.	2	2	0.00015	ENSGALP00000035830,ENSGALP00000038134	TLR2-2,TLR7
PMID:22226542	(2012) Salmonella flagellin enhances mucosal immunity of avian influenza vaccine in chickens.	2	2	0.00015	ENSGALP00000015286,ENSGALP00000043092	TLR3,TLR5
PMID:22499867	(2012) Innate immune response to yeast-derived carbohydrates in broiler chickens fed organic diets and challenged with Clostridium perfringens.	2	2	0.00015	ENSGALP00000011319,ENSGALP00000038134	TLR2-2,TLR4
PMID:24766432	(2014) Current advancements and potential strategies in the development of MERS-CoV vaccines.	2	2	0.00015	ENSGALP00000011319,ENSGALP00000015286	TLR4,TLR5
PMID:24797722	(2014) Avian influenza virus vaccines containing Toll-like receptors 2 and 5 ligand adjuvants promote protective immune responses in chickens.	2	2	0.00015	ENSGALP00000015286,ENSGALP00000038134	TLR2-2,TLR5
PMID:25448257	(2015) Covariation in stress and immune gene expression in a range expanding bird.	2	2	0.00015	ENSGALP00000011319,ENSGALP00000038134	TLR2-2,TLR4
PMID:25938551	(2015) Both MicroRNA-155 and Virus-Encoded MiR-155 Ortholog Regulate TLR3 Expression.	2	2	0.00015	ENSGALP00000038134,ENSGALP00000043092	TLR2-2,TLR3
PMID:26074920	(2015) A Systematic Approach to Identify Markers of Distinctly Activated Human Macrophages.	3	26	0.00015	ENSGALP00000011319,ENSGALP00000042597,ENSGALP00000043092	MYD88,TLR3,TLR4
PMID:26117375	(2015) Regulation of chicken immunity-related genes and host response profiles against Avibacterium paragallinarum pathogen challenge.	2	2	0.00015	ENSGALP00000011319,ENSGALP00000042597	MYD88,TLR4
PMID:28349053	(2017) Immunomodulatory Effects of Saccharomyces cerevisiae Fermentation Product Supplementation on Immune Gene Expression and Lymphocyte Distribution in Immune Organs in Broilers.	3	26	0.00015	ENSGALP00000011319,ENSGALP00000038134,ENSGALP00000043092	TLR2-2,TLR3,TLR4
PMID:28528860	(2017) Purifying selection and concerted evolution of RNA-sensing toll-like receptors in migratory waders.	2	2	0.00015	ENSGALP00000035830,ENSGALP00000043092	TLR3,TLR7
PMID:28726551	(2018) Extracellular Matrix and Integrin Expression Profiles in Fuchs Endothelial Corneal Dystrophy Cells and Tissue Model.	3	26	0.00015	ENSGALP00000000518,ENSGALP00000004173,ENSGALP00000023991	ITGA2,ITGAV,ITGB3
PMID:28739827	(2017) Transcriptional Profiling of the Chicken Tracheal Response to Virulent Mycoplasma gallisepticum Strain Rlow.	2	2	0.00015	ENSGALP00000011319,ENSGALP00000013260	TLR15,TLR4
PMID:28750869	(2017) Probiotic Lactobacillus acidophilus bacteria or synthetic TLR2 agonist boost the growth of chicken embryo intestinal organoids in cultures comprising epithelial cells and myofibroblasts.	2	2	0.00015	ENSGALP00000011319,ENSGALP00000038134	TLR2-2,TLR4
PMID:30902756	(2020) Molecular characterization of Bu-1 and TLR2 gene in Haringhata Black chicken.	2	2	0.00015	ENSGALP00000011319,ENSGALP00000038134	TLR2-2,TLR4
PMID:31311588	(2019) Respiratory health, allergies, and the farm environment: design, methods and enrollment in the observational Wisconsin Infant Study Cohort (WISC): a research proposal.	2	2	0.00015	ENSGALP00000011319,ENSGALP00000035830	TLR4,TLR7
PMID:31863091	(2020) Feed additive blends fed to nursery pigs challenged with Salmonella.	2	2	0.00015	ENSGALP00000011319,ENSGALP00000038134	TLR2-2,TLR4
PMID:32111314	(2020) Dietary beta-sitosterol regulates serum lipid level and improves immune function, antioxidant status, and intestinal morphology in broilers.	2	2	0.00015	ENSGALP00000011319,ENSGALP00000042597	MYD88,TLR4
PMID:32290117	(2020) Correction: Chlamydia psittaci PmpD-N modulated Chicken Macrophage Function by Triggering Th2 Polarization and the TLR2MyD88NF-kappaB Signaling Pathway.	2	2	0.00015	ENSGALP00000038134,ENSGALP00000042597	MYD88,TLR2-2
PMID:32652716	(2020) Positive selection and convergent evolution shape molecular phenotypic traits of innate immunity receptors in tits (Paridae).	2	2	0.00015	ENSGALP00000011319,ENSGALP00000015286	TLR4,TLR5
PMID:32705890	(2020) Epigenetic effect of folic acid (FA) on the gene proximal promoter area and mRNA expression of chicken B cell as antigen presenting cells.	2	2	0.00015	ENSGALP00000011319,ENSGALP00000038134	TLR2-2,TLR4
PMID:21943488	(2011) Dendritic cell and macrophage heterogeneity in vivo.	3	27	0.00016	ENSGALP00000035830,ENSGALP00000037001,ENSGALP00000043092	RAC2,TLR3,TLR7
PMID:23071154	(2012) Tiam1 interaction with the PAR complex promotes talin-mediated Rac1 activation during polarized cell migration.	3	27	0.00016	ENSGALP00000000518,ENSGALP00000012130,ENSGALP00000041692	ITGB2,ITGB3,VAV1
PMID:23220072	(2013) Identification of avian RIG-I responsive genes during influenza infection.	3	27	0.00016	ENSGALP00000035830,ENSGALP00000042597,ENSGALP00000043092	MYD88,TLR3,TLR7
PMID:24860789	(2014) Attenuated Listeria monocytogenes: a powerful and versatile vector for the future of tumor immunotherapy.	3	27	0.00016	ENSGALP00000011319,ENSGALP00000035830,ENSGALP00000042597	MYD88,TLR4,TLR7
PMID:24917862	(2014) Complexity and Diversity of the NKR-P1:Clr (Klrb1:Clec2) Recognition Systems.	3	27	0.00016	ENSGALP00000024180,ENSGALP00000035830,ENSGALP00000043092	FYN,TLR3,TLR7
PMID:25017885	(2014) Extracellular matrix regulation of inflammation in the healthy and injured spinal cord.	3	27	0.00016	ENSGALP00000011319,ENSGALP00000038134,ENSGALP00000042597	MYD88,TLR2-2,TLR4
PMID:26707950	(2016) Molecular mechanisms for enhanced DNA vaccine immunogenicity.	3	27	0.00016	ENSGALP00000035870,ENSGALP00000042597,ENSGALP00000043092	IL7,MYD88,TLR3
PMID:27894330	(2016) Marek's disease in chickens: a review with focus on immunology.	3	27	0.00016	ENSGALP00000011319,ENSGALP00000035830,ENSGALP00000043092	TLR3,TLR4,TLR7
PMID:28904407	(2017) Syk-dependent tyrosine phosphorylation of 3BP2 is required for optimal FcRGamma-mediated phagocytosis and chemokine expression in U937 cells.	3	27	0.00016	ENSGALP00000011319,ENSGALP00000038134,ENSGALP00000041692	TLR2-2,TLR4,VAV1
PMID:30341336	(2018) Deep sequencing of primary human lung epithelial cells challenged with H5N1 influenza virus reveals a proviral role for CEACAM1.	3	27	0.00016	ENSGALP00000023991,ENSGALP00000038134,ENSGALP00000042597	ITGA2,MYD88,TLR2-2
PMID:30617115	(2019) Influenza Pathogenesis: The Effect of Host Factors on Severity of Disease.	3	27	0.00016	ENSGALP00000011319,ENSGALP00000042597,ENSGALP00000043092	MYD88,TLR3,TLR4
PMID:30949175	(2019) Pleiotropic Effects of IL-33 on CD4+ T Cell Differentiation and Effector Functions.	3	27	0.00016	ENSGALP00000012873,ENSGALP00000035870,ENSGALP00000042597	IL7,MYD88,TRAF6
PMID:21892172	(2011) The inflammasome adaptor ASC regulates the function of adaptive immune cells by controlling Dock2-mediated Rac activation and actin polymerization.	3	28	0.00017	ENSGALP00000011319,ENSGALP00000038134,ENSGALP00000042597	MYD88,TLR2-2,TLR4
PMID:22120429	(2012) Vitamin A and immune regulation: role of retinoic acid in gut-associated dendritic cell education, immune protection and tolerance.	3	28	0.00017	ENSGALP00000015286,ENSGALP00000038134,ENSGALP00000042597	MYD88,TLR2-2,TLR5
PMID:23883969	(2013) Applications of nanotechnology for immunology.	3	28	0.00017	ENSGALP00000011319,ENSGALP00000035830,ENSGALP00000038134	TLR2-2,TLR4,TLR7
PMID:25165812	(2014) TLR ligands induce antiviral responses in chicken macrophages.	3	28	0.00017	ENSGALP00000035830,ENSGALP00000038134,ENSGALP00000043092	TLR2-2,TLR3,TLR7
PMID:27622210	(2016) ADP Ribosylation Factor 6 Regulates Neuronal Migration in the Developing Cerebral Cortex through FIP3Arfophilin-1-dependent Endosomal Trafficking of N-cadherin.	3	28	0.00017	ENSGALP00000000518,ENSGALP00000012130,ENSGALP00000024180	FYN,ITGB2,ITGB3
PMID:32270034	(2020) IL-27 signaling activates skin cells to induce innate antiviral proteins and protects against Zika virus infection.	3	28	0.00017	ENSGALP00000012873,ENSGALP00000035830,ENSGALP00000043092	TLR3,TLR7,TRAF6
PMID:19217824	(2009) AMPed up immunity: how antimicrobial peptides have multiple roles in immune defense.	3	29	0.00019	ENSGALP00000011319,ENSGALP00000038134,ENSGALP00000042597	MYD88,TLR2-2,TLR4
PMID:24830559	(2014) Evolving concepts in the pathogenesis of NASH: beyond steatosis and inflammation.	3	29	0.00019	ENSGALP00000011319,ENSGALP00000038134,ENSGALP00000042597	MYD88,TLR2-2,TLR4
PMID:25304691	(2014) Coronavirus-induced ER stress response and its involvement in regulation of coronavirus-host interactions.	3	29	0.00019	ENSGALP00000011319,ENSGALP00000038134,ENSGALP00000043092	TLR2-2,TLR3,TLR4
PMID:26206138	(2015) Induction of innate immunity and its perturbation by influenza viruses.	3	29	0.00019	ENSGALP00000035830,ENSGALP00000042597,ENSGALP00000043092	MYD88,TLR3,TLR7
PMID:27628424	(2016) Global analysis of differential gene expression related to long-term sperm storage in oviduct of Chinese Soft-Shelled Turtle Pelodiscus sinensis.	3	29	0.00019	ENSGALP00000011319,ENSGALP00000038134,ENSGALP00000042597	MYD88,TLR2-2,TLR4
PMID:30158832	(2018) Impact of Retinoic Acid on Immune Cells and Inflammatory Diseases.	3	29	0.00019	ENSGALP00000011319,ENSGALP00000015286,ENSGALP00000038134	TLR2-2,TLR4,TLR5
PMID:31555911	(2019) Caenorhabditis elegans as a model animal for investigating fungal pathogenesis.	3	29	0.00019	ENSGALP00000035830,ENSGALP00000038134,ENSGALP00000043092	TLR2-2,TLR3,TLR7
PMID:31798593	(2019) Network-Based Selection of Candidate Markers and Assays to Assess the Impact of Oral Immune Interventions on Gut Functions.	4	92	0.00019	ENSGALP00000011319,ENSGALP00000015286,ENSGALP00000038134,ENSGALP00000041692	TLR2-2,TLR4,TLR5,VAV1
PMID:31906095	(2019) Csf1 Deficiency Dysregulates Glial Responses to Demyelination and Disturbs CNS White Matter Remyelination.	3	29	0.00019	ENSGALP00000035830,ENSGALP00000038134,ENSGALP00000043092	TLR2-2,TLR3,TLR7
PMID:27071061	(2016) Genome Wide Host Gene Expression Analysis in Chicken Lungs Infected with Avian Influenza Viruses.	4	94	0.0002	ENSGALP00000013260,ENSGALP00000035830,ENSGALP00000042597,ENSGALP00000043092	MYD88,TLR15,TLR3,TLR7
PMID:20847744	(2010) Central roles of NLRs and inflammasomes in viral infection.	3	30	0.00021	ENSGALP00000035830,ENSGALP00000038134,ENSGALP00000043092	TLR2-2,TLR3,TLR7
PMID:23324119	(2013) Genetic architecture of gene expression in the chicken.	3	30	0.00021	ENSGALP00000008911,ENSGALP00000035830,ENSGALP00000038134	BLB2,TLR2-2,TLR7
PMID:25653644	(2014) Interactions of Salmonella with animals and plants.	3	30	0.00021	ENSGALP00000011319,ENSGALP00000015286,ENSGALP00000038134	TLR2-2,TLR4,TLR5
PMID:31623175	(2019) Current Understanding of West Nile Virus Clinical Manifestations, Immune Responses, Neuroinvasion, and Immunotherapeutic Implications.	3	30	0.00021	ENSGALP00000035830,ENSGALP00000042597,ENSGALP00000043092	MYD88,TLR3,TLR7
PMID:15581467	(2004) [Protagonists of innate immunity during in Salmonella infections].	2	3	0.00023	ENSGALP00000011319,ENSGALP00000015286	TLR4,TLR5
PMID:16098593	(2006) Profile of Toll-like receptor expressions and induction of nitric oxide synthesis by Toll-like receptor agonists in chicken monocytes.	2	3	0.00023	ENSGALP00000015286,ENSGALP00000038134	TLR2-2,TLR5
PMID:17201672	(2006) Transcriptome of local innate and adaptive immunity during early phase of infectious bronchitis viral infection.	2	3	0.00023	ENSGALP00000038134,ENSGALP00000043092	TLR2-2,TLR3
PMID:19501622	(2009) Progress on the development of therapeutics against West Nile virus.	3	31	0.00023	ENSGALP00000035830,ENSGALP00000042597,ENSGALP00000043092	MYD88,TLR3,TLR7
PMID:19539094	(2009) The avian Toll-Like receptor pathway--subtle differences amidst general conformity.	2	3	0.00023	ENSGALP00000035830,ENSGALP00000038134	TLR2-2,TLR7
PMID:20370926	(2010) Response network analysis of differential gene expression in human epithelial lung cells during avian influenza infections.	3	31	0.00023	ENSGALP00000013260,ENSGALP00000027049,ENSGALP00000038134	IL1R1,TLR15,TLR2-2
PMID:21197087	(2010) Interactions of overweight, poor oral health, and stress related to chronic disease in an aging population.	2	3	0.00023	ENSGALP00000011319,ENSGALP00000038134	TLR2-2,TLR4
PMID:22272335	(2012) Cell walls of Saccharomyces cerevisiae differentially modulated innate immunity and glucose metabolism during late systemic inflammation.	3	31	0.00023	ENSGALP00000011319,ENSGALP00000038134,ENSGALP00000043092	TLR2-2,TLR3,TLR4
PMID:23236523	(2012) The evolution and origin of animal Toll-like receptor signaling pathway revealed by network-level molecular evolutionary analyses.	2	3	0.00023	ENSGALP00000011319,ENSGALP00000042597	MYD88,TLR4
PMID:23937992	(2013) Recombinant flagellin and its cross-talk with lipopolysaccharide--effect on pooled chicken peripheral blood mononuclear cells.	2	3	0.00023	ENSGALP00000011319,ENSGALP00000015286	TLR4,TLR5
PMID:24709390	(2014) Overview of vertebrate animal models of fungal infection.	2	3	0.00023	ENSGALP00000035830,ENSGALP00000042597	MYD88,TLR7
PMID:24866749	(2014) Buggy Creek virus (Togaviridae: Alphavirus) upregulates expression of pattern recognition receptors and interferons in House Sparrows (Passer domesticus).	2	3	0.00023	ENSGALP00000013260,ENSGALP00000035830	TLR15,TLR7
PMID:26333838	(2015) Persistent Activation of the Innate Immune Response in Adult Drosophila Following Radiation Exposure During Larval Development.	2	3	0.00023	ENSGALP00000015286,ENSGALP00000042597	MYD88,TLR5
PMID:26740133	(2016) Organic trace mineral supplementation enhances local and systemic innate immune responses and modulates oxidative stress in broiler chickens.	2	3	0.00023	ENSGALP00000011319,ENSGALP00000038134	TLR2-2,TLR4
PMID:27115541	(2016) The several elements of intestinal innate immune system at the beginning of the life of broiler chicks.	2	3	0.00023	ENSGALP00000011319,ENSGALP00000038134	TLR2-2,TLR4
PMID:27145596	(2016) [AVIAN RECOMBINANT VIRUS H5N1 INFLUENZA (AVIETNAM120304) AND ITS ESCAPE-MUTANT m13(13) INDUCE EARLY SIGNALING REACTIONS OF THE IMMUNITY IN HUMAN LYMPHOCYTES].	2	3	0.00023	ENSGALP00000011319,ENSGALP00000035830	TLR4,TLR7
PMID:27349993	(2016) Infection of chicken bone marrow mononuclear cells with subgroup J avian leukosis virus inhibits dendritic cell differentiation and alters cytokine expression.	2	3	0.00023	ENSGALP00000038134,ENSGALP00000043092	TLR2-2,TLR3
PMID:28424686	(2017) Mucosal and Systemic Immune Responses to Influenza H7N9 Antigen HA1-2 Co-Delivered Intranasally with Flagellin or Polyethyleneimine in Mice and Chickens.	2	3	0.00023	ENSGALP00000011319,ENSGALP00000015286	TLR4,TLR5
PMID:28603519	(2017) Antigen-Sparing and Enhanced Efficacy of Multivalent Vaccines Adjuvanted with Immunopotentiators in Chickens.	2	3	0.00023	ENSGALP00000035830,ENSGALP00000043092	TLR3,TLR7
PMID:28710255	(2017) Cathelicidins Inhibit Escherichia coli-Induced TLR2 and TLR4 Activation in a Viability-Dependent Manner.	2	3	0.00023	ENSGALP00000011319,ENSGALP00000038134	TLR2-2,TLR4
PMID:29471139	(2018) TLR2MyD88NF-kappaB signaling pathway regulates IL-1beta production in DF-1 cells exposed to Mycoplasma gallisepticum LAMPs.	2	3	0.00023	ENSGALP00000038134,ENSGALP00000042597	MYD88,TLR2-2
PMID:29587428	(2018) NF-KB Activation in Lymphoid Malignancies: Genetics, Signaling, and Targeted Therapy.	3	31	0.00023	ENSGALP00000012873,ENSGALP00000042597,ENSGALP00000043092	MYD88,TLR3,TRAF6
PMID:29660095	(2018) Effect of dietary Bacillus coagulans supplementation on growth performance and immune responses of broiler chickens challenged by Salmonella enteritidis.	2	3	0.00023	ENSGALP00000011319,ENSGALP00000038134	TLR2-2,TLR4
PMID:30216776	(2018) Newcastle disease virus infection triggers HMGB1 release to promote the inflammatory response.	2	3	0.00023	ENSGALP00000011319,ENSGALP00000038134	TLR2-2,TLR4
PMID:30816980	(2019) Pathogenicity patterns of mucormycosis: epidemiology, interaction with immune cells and virulence factors.	3	31	0.00023	ENSGALP00000011319,ENSGALP00000035870,ENSGALP00000038134	IL7,TLR2-2,TLR4
PMID:31118935	(2019) Role of Multivalency and Antigenic Threshold in Generating Protective Antibody Responses.	2	3	0.00023	ENSGALP00000011319,ENSGALP00000035830	TLR4,TLR7
PMID:31138615	(2019) Vaccination against Clostridium difficile by Use of an Attenuated Salmonella enterica Serovar Typhimurium Vector (YS1646) Protects Mice from Lethal Challenge.	2	3	0.00023	ENSGALP00000011319,ENSGALP00000015286	TLR4,TLR5
PMID:31194771	(2019) Effects of Lactobacillus plantarum 15-1 and fructooligosaccharides on the response of broilers to pathogenic Escherichia coli O78 challenge.	2	3	0.00023	ENSGALP00000011319,ENSGALP00000038134	TLR2-2,TLR4
PMID:31255797	(2019) Innate antiviral responses are induced by TLR3 and TLR4 ligands in chicken tracheal epithelial cells: Communication between epithelial cells and macrophages.	2	3	0.00023	ENSGALP00000011319,ENSGALP00000043092	TLR3,TLR4
PMID:31446518	(2019) Co-administration of toll-like receptor (TLR)-3 and 4 ligands augments immune response to Newcastle disease virus (NDV) vaccine in chicken.	2	3	0.00023	ENSGALP00000011319,ENSGALP00000043092	TLR3,TLR4
PMID:32276652	(2020) Mycoplasma gallisepticum triggers immune damage in the chicken thymus by activating the TLR-2MyD88NF-kappaB signaling pathway and NLRP3 inflammasome.	2	3	0.00023	ENSGALP00000038134,ENSGALP00000042597	MYD88,TLR2-2
PMID:32388770	(2020) Selenium Deficiency via the TLR4TRIFNF-kappaB Signaling Pathway Leading to Inflammatory Injury in Chicken Spleen.	2	3	0.00023	ENSGALP00000011319,ENSGALP00000042597	MYD88,TLR4
PMID:32424752	(2020) Protective effects of dietary mannan oligosaccharide on heat stress-induced hepatic damage in broilers.	2	3	0.00023	ENSGALP00000011319,ENSGALP00000042597	MYD88,TLR4
PMID:18836477	(2008) TRIM family proteins and their emerging roles in innate immunity.	3	32	0.00024	ENSGALP00000011319,ENSGALP00000035830,ENSGALP00000043092	TLR3,TLR4,TLR7
PMID:21909386	(2011) A candidate HIVAIDS vaccine (MVA-B) lacking vaccinia virus gene C6L enhances memory HIV-1-specific T-cell responses.	3	32	0.00024	ENSGALP00000012873,ENSGALP00000038134,ENSGALP00000042597	MYD88,TLR2-2,TRAF6
PMID:25023063	(2014) Regulation of RIG-I-like receptor signaling by host and viral proteins.	3	32	0.00024	ENSGALP00000012873,ENSGALP00000035830,ENSGALP00000043092	TLR3,TLR7,TRAF6
PMID:26082777	(2015) Investigating Evolutionary Conservation of Dendritic Cell Subset Identity and Functions.	3	32	0.00024	ENSGALP00000035830,ENSGALP00000042597,ENSGALP00000043092	MYD88,TLR3,TLR7
PMID:21682744	(2011) Eosinophils: multifaceted biological properties and roles in health and disease.	3	33	0.00026	ENSGALP00000011319,ENSGALP00000035830,ENSGALP00000038134	TLR2-2,TLR4,TLR7
PMID:30764493	(2019) Emerging Regulatory Roles of Dual-Specificity Phosphatases in Inflammatory Airway Disease.	3	33	0.00026	ENSGALP00000011319,ENSGALP00000038134,ENSGALP00000043092	TLR2-2,TLR3,TLR4
PMID:20636817	(2010) Measles virus-induced suppression of immune responses.	3	34	0.00028	ENSGALP00000011319,ENSGALP00000041692,ENSGALP00000043092	TLR3,TLR4,VAV1
PMID:24527057	(2014) Gene Expression Profiles Underlying Selective T-Cell-Mediated Immunity Activity of a Chinese Medicine Granule on Mice Infected with Influenza Virus H1N1.	3	34	0.00028	ENSGALP00000012873,ENSGALP00000035830,ENSGALP00000042597	MYD88,TLR7,TRAF6
PMID:30697214	(2018) Nutritional Modulation of Immune Function: Analysis of Evidence, Mechanisms, and Clinical Relevance.	3	34	0.00028	ENSGALP00000011319,ENSGALP00000041692,ENSGALP00000042597	MYD88,TLR4,VAV1
PMID:22809568	(2012) Increasing the efficacy of tumor cell vaccines by enhancing cross priming.	3	35	0.0003	ENSGALP00000011319,ENSGALP00000035830,ENSGALP00000043092	TLR3,TLR4,TLR7
PMID:23758654	(2013) Differential response of bovine mammary epithelial cells to Staphylococcus aureus or Escherichia coli agonists of the innate immune system.	3	35	0.0003	ENSGALP00000011319,ENSGALP00000015286,ENSGALP00000038134	TLR2-2,TLR4,TLR5
PMID:23796410	(2013) Understanding and altering cell tropism of vesicular stomatitis virus.	3	35	0.0003	ENSGALP00000011319,ENSGALP00000035830,ENSGALP00000043092	TLR3,TLR4,TLR7
PMID:24711582	(2014) Adjuvant-specific regulation of long-term antibody responses by ZBTB20.	3	35	0.0003	ENSGALP00000011319,ENSGALP00000012130,ENSGALP00000038134	ITGB2,TLR2-2,TLR4
PMID:24337808	(2014) Lysosomal multienzyme complex: pros and cons of working together.	3	36	0.00032	ENSGALP00000011319,ENSGALP00000038134,ENSGALP00000042597	MYD88,TLR2-2,TLR4
PMID:25243137	(2014) Newcastle disease virus interaction in targeted therapy against proliferation and invasion pathways of glioblastoma multiforme.	3	36	0.00032	ENSGALP00000024116,ENSGALP00000035830,ENSGALP00000043092	IQGAP2,TLR3,TLR7
PMID:28625850	(2017) Structure and Function of Viral Deubiquitinating Enzymes.	3	36	0.00032	ENSGALP00000041692,ENSGALP00000042597,ENSGALP00000043092	MYD88,TLR3,VAV1
PMID:31649660	(2019) A Comparison of the Innate and Adaptive Immune Systems in Cartilaginous Fish, Ray-Finned Fish, and Lobe-Finned Fish.	3	36	0.00032	ENSGALP00000011319,ENSGALP00000038134,ENSGALP00000043092	TLR2-2,TLR3,TLR4
PMID:11590137	(2001) Molecular cloning and functional characterization of chicken toll-like receptors. A single chicken toll covers multiple molecular patterns.	2	4	0.00033	ENSGALP00000011319,ENSGALP00000038134	TLR2-2,TLR4
PMID:16223858	(2006) Expression and function of Toll-like receptor 4 in the endometrial cells of the uterus.	2	4	0.00033	ENSGALP00000011319,ENSGALP00000038134	TLR2-2,TLR4
PMID:16930467	(2006) The peptidoglycan recognition proteins (PGRPs).	2	4	0.00033	ENSGALP00000011319,ENSGALP00000038134	TLR2-2,TLR4
PMID:17138057	(2006) The nonopsonic allogeneic cell phagocytosis of macrophages detected by flow cytometry and two photon fluorescence microscope.	2	4	0.00033	ENSGALP00000011319,ENSGALP00000038134	TLR2-2,TLR4
PMID:17283206	(2007) A conserved surface on Toll-like receptor 5 recognizes bacterial flagellin.	2	4	0.00033	ENSGALP00000011319,ENSGALP00000038134	TLR2-2,TLR4
PMID:19002681	(2009) Differential mRNA expression of the avian-specific toll-like receptor 15 between heterophils from Salmonella-susceptible and -resistant chickens.	2	4	0.00033	ENSGALP00000013260,ENSGALP00000042597	MYD88,TLR15
PMID:19584813	(2009) Drug delivery-mediated control of RNA immunostimulation.	2	4	0.00033	ENSGALP00000035830,ENSGALP00000043092	TLR3,TLR7
PMID:20091781	(2010) NOD2 mediates inflammatory responses of primary murine glia to Streptococcus pneumoniae.	2	4	0.00033	ENSGALP00000038134,ENSGALP00000042597	MYD88,TLR2-2
PMID:21944051	(2011) In vitro lipopolysaccharide treatment alters regulatory T cell properties in chickens.	2	4	0.00033	ENSGALP00000011319,ENSGALP00000038134	TLR2-2,TLR4
PMID:22494937	(2012) Eimeria tenella heat shock protein 70 enhances protection of recombinant microneme protein MIC2 subunit antigen vaccination against E. tenella challenge.	2	4	0.00033	ENSGALP00000011319,ENSGALP00000038134	TLR2-2,TLR4
PMID:22912450	(2012) Local and systemic innate immunity in broiler chickens supplemented with yeast-derived carbohydrates.	2	4	0.00033	ENSGALP00000011319,ENSGALP00000038134	TLR2-2,TLR4
PMID:23517052	(2013) Characterization of cross protection of Swine-Origin Influenza Virus (S-OIV) H1N1 and reassortant H5N1 influenza vaccine in BALBc mice given a single-dose vaccination.	2	4	0.00033	ENSGALP00000011319,ENSGALP00000042597	MYD88,TLR4
PMID:23873159	(2013) Expression profiles of Toll-like receptors 1, 2 and 5 in selected organs of commercial and indigenous chickens.	2	4	0.00033	ENSGALP00000015286,ENSGALP00000038134	TLR2-2,TLR5
PMID:24530927	(2014) The effects of administration of ligands for Toll-like receptor 4 and 21 against Marek's disease in chickens.	2	4	0.00033	ENSGALP00000011319,ENSGALP00000043092	TLR3,TLR4
PMID:25500018	(2015) Synergy of lipopolysaccharide and resiquimod on type I interferon, pro-inflammatory cytokine, Th1 and Th2 response in chicken peripheral blood mononuclear cells.	2	4	0.00033	ENSGALP00000011319,ENSGALP00000035830	TLR4,TLR7
PMID:25648133	(2015) Improvement of DNA vaccination by adjuvants and sophisticated delivery devices: vaccine-platforms for the battle against infectious diseases.	2	4	0.00033	ENSGALP00000042597,ENSGALP00000043092	MYD88,TLR3
PMID:25799221	(2015) Protection against multiple influenza A virus strains induced by candidate recombinant vaccine based on heterologous M2e peptides linked to flagellin.	2	4	0.00033	ENSGALP00000015286,ENSGALP00000035830	TLR5,TLR7
PMID:26716022	(2015) Toll-Like Receptor-4 Dependent Small Intestinal Immune Responses Following Murine Arcobacter Butzleri Infection.	2	4	0.00033	ENSGALP00000011319,ENSGALP00000038134	TLR2-2,TLR4
PMID:27315286	(2016) In Vitro and In Vivo Attenuation of Vesicular Stomatitis Virus (VSV) by Phosphoprotein Deletion.	2	4	0.00033	ENSGALP00000035830,ENSGALP00000043092	TLR3,TLR7
PMID:27395045	(2016) Astragaloside IV Inhibits the Inflammatory Injury of Chicken Type II Pneumocytes Induced by Avian Pathogenic Escherichia coli.	2	4	0.00033	ENSGALP00000011319,ENSGALP00000015286	TLR4,TLR5
PMID:28243087	(2017) Cationic liposomes promote antigen cross-presentation in dendritic cells by alkalizing the lysosomal pH and limiting the degradation of antigens.	2	4	0.00033	ENSGALP00000011319,ENSGALP00000043092	TLR3,TLR4
PMID:28326446	(2017) Blastocystis: how do specific diets and human gut microbiota affect its development and pathogenicity?	2	4	0.00033	ENSGALP00000011319,ENSGALP00000038134	TLR2-2,TLR4
PMID:28886586	(2017) A murine Ig light chain transgene reveals IGKV3 gene contributions to anti-collagen types IV and II specificities.	2	4	0.00033	ENSGALP00000011319,ENSGALP00000035830	TLR4,TLR7
PMID:29547971	(2018) Potential targets for next generation antimicrobial glycoconjugate vaccines.	2	4	0.00033	ENSGALP00000011319,ENSGALP00000038134	TLR2-2,TLR4
PMID:29958294	(2018) The analysis of genome composition and codon bias reveals distinctive patterns between avian and mammalian circoviruses which suggest a potential recombinant origin for Porcine circovirus 3.	2	4	0.00033	ENSGALP00000035830,ENSGALP00000043092	TLR3,TLR7
PMID:30518356	(2018) Intestinal microbiota mediates Enterotoxigenic Escherichia coli-induced diarrhea in piglets.	2	4	0.00033	ENSGALP00000011319,ENSGALP00000015286	TLR4,TLR5
PMID:30886247	(2019) Cathelicidins PMAP-36, LL-37 and CATH-2 are similar peptides with different modes of action.	2	4	0.00033	ENSGALP00000011319,ENSGALP00000038134	TLR2-2,TLR4
PMID:32055154	(2018) Effect of the Addition of Saccharomyces Cerevisiae Yeast Cell Walls to Diets with Mycotoxins on the Performance and Immune Responses of Broilers.	2	4	0.00033	ENSGALP00000011319,ENSGALP00000038134	TLR2-2,TLR4
PMID:32477965	(2020) Pattern Recognition Receptor Signaling and Innate Responses to Influenza A Viruses in the Mallard Duck, Compared to Humans and Chickens.	2	4	0.00033	ENSGALP00000035830,ENSGALP00000043092	TLR3,TLR7
PMID:19447676	(2009) New insights into the regulation of human B-cell differentiation.	3	37	0.00034	ENSGALP00000011319,ENSGALP00000035830,ENSGALP00000035870	IL7,TLR4,TLR7
PMID:21994750	(2011) The role of interferon antagonist, non-structural proteins in the pathogenesis and emergence of arboviruses.	3	37	0.00034	ENSGALP00000035830,ENSGALP00000042597,ENSGALP00000043092	MYD88,TLR3,TLR7
PMID:30744138	(2019) Modulation of Autophagy for Controlling Immunity.	3	38	0.00036	ENSGALP00000011319,ENSGALP00000012873,ENSGALP00000035830	TLR4,TLR7,TRAF6
PMID:20672012	(2010) Probiotics-host communication: Modulation of signaling pathways in the intestine.	3	39	0.00039	ENSGALP00000011319,ENSGALP00000038134,ENSGALP00000042597	MYD88,TLR2-2,TLR4
PMID:21786215	(2011) Nuclear factor-KB: a key regulator in health and disease of lungs.	3	39	0.00039	ENSGALP00000011319,ENSGALP00000042597,ENSGALP00000043092	MYD88,TLR3,TLR4
PMID:24707473	(2014) Identification of key genes in the response to Salmonella enterica Enteritidis, Salmonella enterica Pullorum, and poly(I:C) in chicken spleen and caecum.	3	39	0.00039	ENSGALP00000035870,ENSGALP00000041692,ENSGALP00000042597	IL7,MYD88,VAV1
PMID:27736938	(2016) Heat Stress and Lipopolysaccharide Stimulation of Chicken Macrophage-Like Cell Line Activates Expression of Distinct Sets of Genes.	3	39	0.00039	ENSGALP00000011319,ENSGALP00000012873,ENSGALP00000042597	MYD88,TLR4,TRAF6
PMID:19189046	(2009) Role of protein-tyrosine phosphatases in regulation of osteoclastic activity.	3	40	0.00041	ENSGALP00000012873,ENSGALP00000024180,ENSGALP00000041692	FYN,TRAF6,VAV1
PMID:28798904	(2017) Tick-Borne Viruses and Biological Processes at the Tick-Host-Virus Interface.	3	40	0.00041	ENSGALP00000011319,ENSGALP00000035830,ENSGALP00000043092	TLR3,TLR4,TLR7
PMID:30197639	(2018) Transcriptomic Characterization of a Chicken Embryo Model Infected With Duck Hepatitis A Virus Type 1.	3	40	0.00041	ENSGALP00000035830,ENSGALP00000042597,ENSGALP00000043092	MYD88,TLR3,TLR7
PMID:30465881	(2019) Activation of GPR55 induces neuroprotection of hippocampal neurogenesis and immune responses of neural stem cells following chronic, systemic inflammation.	3	40	0.00041	ENSGALP00000011319,ENSGALP00000012873,ENSGALP00000042597	MYD88,TLR4,TRAF6
PMID:32063855	(2019) Small Leucine-Rich Proteoglycans in Skin Wound Healing.	3	40	0.00041	ENSGALP00000011319,ENSGALP00000023991,ENSGALP00000038134	ITGA2,TLR2-2,TLR4
PMID:12814703	(2003) In silico identification of components of the Toll-like receptor (TLR) signaling pathway in clustered chicken expressed sequence tags (ESTs).	2	5	0.00044	ENSGALP00000012873,ENSGALP00000042597	MYD88,TRAF6
PMID:15804288	(2005) Identification and characterization of a functional, alternatively spliced Toll-like receptor 7 (TLR7) and genomic disruption of TLR8 in chickens.	2	5	0.00044	ENSGALP00000035830,ENSGALP00000043092	TLR3,TLR7
PMID:16883572	(2006) The macrophage heterogeneity: difference between mouse peritoneal exudate and splenic F480+ macrophages.	2	5	0.00044	ENSGALP00000011319,ENSGALP00000038134	TLR2-2,TLR4
PMID:18535658	(2008) Patterns of evolution and host gene mimicry in influenza and other RNA viruses.	2	5	0.00044	ENSGALP00000035830,ENSGALP00000043092	TLR3,TLR7
PMID:19923904	(2009) Vaccines against tularemia.	2	5	0.00044	ENSGALP00000011319,ENSGALP00000038134	TLR2-2,TLR4
PMID:20132533	(2010) Coevolution of activating and inhibitory receptors within mammalian carcinoembryonic antigen families.	2	5	0.00044	ENSGALP00000038134,ENSGALP00000041692	TLR2-2,VAV1
PMID:20514301	(2010) Protease allergens induce the expression of IL-25 via Erk and p38 MAPK pathway.	2	5	0.00044	ENSGALP00000035870,ENSGALP00000042597	IL7,MYD88
PMID:20604940	(2010) A VLP-based vaccine targeting domain III of the West Nile virus E protein protects from lethal infection in mice.	2	5	0.00044	ENSGALP00000035830,ENSGALP00000043092	TLR3,TLR7
PMID:20808848	(2010) A rapid change in virulence gene expression during the transition from the intestinal lumen into tissue promotes systemic dissemination of Salmonella.	2	5	0.00044	ENSGALP00000011319,ENSGALP00000015286	TLR4,TLR5
PMID:21292412	(2011) Effects of sexual maturation and Salmonella infection on the expression of Toll-like receptors in the chicken vagina.	2	5	0.00044	ENSGALP00000015286,ENSGALP00000035830	TLR5,TLR7
PMID:21390237	(2011) Changes in gene expression and cellular architecture in an ovarian cancer progression model.	3	41	0.00044	ENSGALP00000004173,ENSGALP00000012130,ENSGALP00000024180	FYN,ITGAV,ITGB2
PMID:21687770	(2010) The francisella tularensis proteome and its recognition by antibodies.	2	5	0.00044	ENSGALP00000011319,ENSGALP00000038134	TLR2-2,TLR4
PMID:22808254	(2012) Campylobacter jejuni induces acute enterocolitis in gnotobiotic IL-10-- mice via Toll-like-receptor-2 and -4 signaling.	2	5	0.00044	ENSGALP00000011319,ENSGALP00000042597	MYD88,TLR4
PMID:23064463	(2012) The Toll-like receptor 5 ligand flagellin promotes asthma by priming allergic responses to indoor allergens.	2	5	0.00044	ENSGALP00000015286,ENSGALP00000042597	MYD88,TLR5
PMID:23237364	(2012) Differential innate responses of chickens and ducks to low-pathogenic avian influenza.	2	5	0.00044	ENSGALP00000035830,ENSGALP00000043092	TLR3,TLR7
PMID:23363372	(2013) Comparison and contrast of genes and biological pathways responding to Marek's disease virus infection using allele-specific expression and differential expression in broiler and layer chickens.	2	5	0.00044	ENSGALP00000011319,ENSGALP00000042597	MYD88,TLR4
PMID:23646158	(2013) Baicalein reduces airway injury in allergen and IL-13 induced airway inflammation.	2	5	0.00044	ENSGALP00000011319,ENSGALP00000038134	TLR2-2,TLR4
PMID:23761445	(2013) The genome of Anopheles darlingi, the main neotropical malaria vector.	2	5	0.00044	ENSGALP00000012873,ENSGALP00000042597	MYD88,TRAF6
PMID:24028551	(2013) Contrasted evolutionary histories of two Toll-like receptors (Tlr4 and Tlr7) in wild rodents (MURINAE).	2	5	0.00044	ENSGALP00000015286,ENSGALP00000038134	TLR2-2,TLR5
PMID:24528860	(2014) Innate resistance against Toxoplasma gondii: an evolutionary tale of mice, cats, and men.	2	5	0.00044	ENSGALP00000035830,ENSGALP00000042597	MYD88,TLR7
PMID:24604847	(2014) Differential expression of Toll-like receptor pathway genes in chicken embryo fibroblasts from chickens resistant and susceptible to Marek's disease.	2	5	0.00044	ENSGALP00000035830,ENSGALP00000043092	TLR3,TLR7
PMID:24925139	(2014) From empiricism to rational design: a personal perspective of the evolution of vaccine development.	2	5	0.00044	ENSGALP00000011319,ENSGALP00000035830	TLR4,TLR7
PMID:25529753	(2015) Advancements in the development of subunit influenza vaccines.	2	5	0.00044	ENSGALP00000015286,ENSGALP00000043092	TLR3,TLR5
PMID:25979675	(2015) A mutation in the NLRC5 promoter limits NF-kappaB signaling after Salmonella Enteritidis infection in the spleen of young chickens.	2	5	0.00044	ENSGALP00000011319,ENSGALP00000042597	MYD88,TLR4
PMID:26118124	(2015) Up-regulation of NLRC5 and NF-kappaB signaling pathway in carrier chickens challenged with Salmonella enterica Serovar Pullorum at different persistence periods.	2	5	0.00044	ENSGALP00000011319,ENSGALP00000042597	MYD88,TLR4
PMID:26716021	(2015) Toll-Like Receptor-4 is Essential for Arcobacter Butzleri-Induced Colonic and Systemic Immune Responses in Gnotobiotic IL-10(--) Mice.	2	5	0.00044	ENSGALP00000011319,ENSGALP00000038134	TLR2-2,TLR4
PMID:26860534	(2016) Evolutionary patterns of Toll-like receptor signaling pathway genes in the Suidae.	2	5	0.00044	ENSGALP00000038134,ENSGALP00000042597	MYD88,TLR2-2
PMID:26999396	(2016) Bacterial Evasion of Host Antimicrobial Peptide Defenses.	2	5	0.00044	ENSGALP00000011319,ENSGALP00000038134	TLR2-2,TLR4
PMID:27232188	(2016) Immunopotentiators Improve the Efficacy of Oil-Emulsion-Inactivated Avian Influenza Vaccine in Chickens, Ducks and Geese.	2	5	0.00044	ENSGALP00000035830,ENSGALP00000043092	TLR3,TLR7
PMID:27437146	(2016) A Fusion Protein Based on the Second Subunit of Hemagglutinin of Influenza AH2N2 Viruses Provides Cross Immunity.	2	5	0.00044	ENSGALP00000015286,ENSGALP00000042597	MYD88,TLR5
PMID:27445700	(2016) Prenatal Activation of Toll-Like Receptor-4 Dampens Adult Hippocampal Neurogenesis in An IL-6 Dependent Manner.	2	5	0.00044	ENSGALP00000011319,ENSGALP00000043092	TLR3,TLR4
PMID:27502317	(2016) Adaptive evolution of virus-sensing toll-like receptor 8 in bats.	2	5	0.00044	ENSGALP00000011319,ENSGALP00000035830	TLR4,TLR7
PMID:28102367	(2017) Interspecies cathelicidin comparison reveals divergence in antimicrobial activity, TLR modulation, chemokine induction and regulation of phagocytosis.	2	5	0.00044	ENSGALP00000011319,ENSGALP00000038134	TLR2-2,TLR4
PMID:28241791	(2017) Lipopolysaccharide mediates immuno-pathological alterations in young chicken liver through TLR4 signaling.	2	5	0.00044	ENSGALP00000011319,ENSGALP00000042597	MYD88,TLR4
PMID:28283953	(2017) The Effects of Agaricus blazei Murill Polysaccharides on Cadmium-Induced Apoptosis and the TLR4 Signaling Pathway of Peripheral Blood Lymphocytes in Chicken.	2	5	0.00044	ENSGALP00000011319,ENSGALP00000042597	MYD88,TLR4
PMID:28669384	(2017) Differences in expression of genes in the MyD88 and TRIF signalling pathways and methylation of TLR4 and TRIF in Tibetan chickens and DaHeng S03 chickens infected with Salmonella enterica serovar enteritidis.	2	5	0.00044	ENSGALP00000011319,ENSGALP00000042597	MYD88,TLR4
PMID:28869283	(2017) Review article: the human intestinal virome in health and disease.	2	5	0.00044	ENSGALP00000035830,ENSGALP00000043092	TLR3,TLR7
PMID:28987624	(2017) Toll like receptor 4 signaling pathway participated in Salmonella lipopolysaccharide-induced spleen injury in young chicks.	2	5	0.00044	ENSGALP00000011319,ENSGALP00000042597	MYD88,TLR4
PMID:29050325	(2017) Toll-like receptor 3 pathway restricts Marek's disease virus infection.	2	5	0.00044	ENSGALP00000012873,ENSGALP00000043092	TLR3,TRAF6
PMID:29125098	(2014) Enterococci and Their Interactions with the Intestinal Microbiome.	2	5	0.00044	ENSGALP00000015286,ENSGALP00000042597	MYD88,TLR5
PMID:29429996	(2018) Application of light sheet microscopy for qualitative and quantitative analysis of bronchus-associated lymphoid tissue in mice.	2	5	0.00044	ENSGALP00000011319,ENSGALP00000042597	MYD88,TLR4
PMID:30234123	(2018) Feed Choice Led to Higher Protein Intake in Broiler Chickens Experimentally Infected With Campylobacter jejuni.	2	5	0.00044	ENSGALP00000011319,ENSGALP00000038134	TLR2-2,TLR4
PMID:31627415	(2019) Yellow Fever: Integrating Current Knowledge with Technological Innovations to Identify Strategies for Controlling a Re-Emerging Virus.	3	41	0.00044	ENSGALP00000035830,ENSGALP00000038134,ENSGALP00000043092	TLR2-2,TLR3,TLR7
PMID:31924786	(2020) Arf1-mediated lipid metabolism sustains cancer cells and its ablation induces anti-tumor immune responses in mice.	3	41	0.00044	ENSGALP00000011319,ENSGALP00000042597,ENSGALP00000043092	MYD88,TLR3,TLR4
PMID:32875814	(2020) Yeast cell wall polysaccharides enhanced expression of T helper type 1 and 2 cytokines profile in chicken B lymphocytes exposed to LPS challenge and enzyme treatment.	2	5	0.00044	ENSGALP00000011319,ENSGALP00000038134	TLR2-2,TLR4
PMID:28579762	(2017) Prepartal Energy Intake Alters Blood Polymorphonuclear Leukocyte Transcriptome During the Peripartal Period in Holstein Cows.	3	42	0.00045	ENSGALP00000011319,ENSGALP00000015286,ENSGALP00000042597	MYD88,TLR4,TLR5
PMID:29777220	(2018) Re-evaluating microglia expression profiles using RiboTag and cell isolation strategies.	3	42	0.00045	ENSGALP00000011319,ENSGALP00000035830,ENSGALP00000036433	F13A1,TLR4,TLR7
PMID:20627072	(2010) Tumors as organs: complex tissues that interface with the entire organism.	3	43	0.00048	ENSGALP00000011319,ENSGALP00000038134,ENSGALP00000042597	MYD88,TLR2-2,TLR4
PMID:24117812	(2013) The actin-bundling protein L-plastin supports T-cell motility and activation.	3	44	0.00051	ENSGALP00000024180,ENSGALP00000037001,ENSGALP00000041692	FYN,RAC2,VAV1
PMID:25906258	(2015) Investigation of Pathogenesis of H1N1 Influenza Virus and Swine Streptococcus suis Serotype 2 Co-Infection in Pigs by Microarray Analysis.	3	44	0.00051	ENSGALP00000011319,ENSGALP00000038134,ENSGALP00000042597	MYD88,TLR2-2,TLR4
PMID:26539170	(2015) Extracellular vesicles from infected cells: potential for direct pathogenesis.	3	44	0.00051	ENSGALP00000035830,ENSGALP00000038134,ENSGALP00000043092	TLR2-2,TLR3,TLR7
PMID:22745106	(2012) Promising personalized therapeutic options for diffuse large B-cell Lymphoma Subtypes with oncogene addictions.	3	45	0.00054	ENSGALP00000004924,ENSGALP00000012873,ENSGALP00000024180	FYN,NCOR2,TRAF6
PMID:23348416	(2013) Marginal zone B cells: virtues of innate-like antibody-producing lymphocytes.	3	45	0.00054	ENSGALP00000035870,ENSGALP00000037001,ENSGALP00000042597	IL7,MYD88,RAC2
PMID:19573927	(2009) Chicken TLR21 acts as a functional homologue to mammalian TLR9 in the recognition of CpG oligodeoxynucleotides.	2	6	0.00055	ENSGALP00000013260,ENSGALP00000035830	TLR15,TLR7
PMID:20721677	(2010) Does administration of non-steroidal anti-inflammatory drug determine morphological changes in adrenal cortex: ultrastructural studies.	2	6	0.00055	ENSGALP00000011319,ENSGALP00000038134	TLR2-2,TLR4
PMID:20809414	(2011) Avian toll-like receptors.	2	6	0.00055	ENSGALP00000013260,ENSGALP00000038134	TLR15,TLR2-2
PMID:21557981	(2011) Immunoadjuvant efficacy of plasmids with multiple copies of a CpG motif coadministrated with avian influenza vaccine in chickens.	2	6	0.00055	ENSGALP00000035830,ENSGALP00000043092	TLR3,TLR7
PMID:21934014	(2011) The effect of in ovo administration of mannan oligosaccharide on small intestine development during the pre- and posthatch periods in chickens.	2	6	0.00055	ENSGALP00000011319,ENSGALP00000038134	TLR2-2,TLR4
PMID:22860004	(2012) Deep sequencing-based transcriptome analysis of chicken spleen in response to avian pathogenic Escherichia coli (APEC) infection.	2	6	0.00055	ENSGALP00000011319,ENSGALP00000038134	TLR2-2,TLR4
PMID:23030671	(2012) Treatment with ligands for toll-like receptors 2 and 5 induces a mixed T-helper 1- and 2-like response in chicken splenocytes.	2	6	0.00055	ENSGALP00000015286,ENSGALP00000038134	TLR2-2,TLR5
PMID:2458407	(1988) Immunocytochemical studies of endothelial cells in vivo. II. Chicken aortic and capillary endothelial cells exhibit different cell surface distributions of the integrin complex.	2	6	0.00055	ENSGALP00000000518,ENSGALP00000012130	ITGB2,ITGB3
PMID:24594676	(2014) B cell response and mechanisms of antibody protection to West Nile virus.	2	6	0.00055	ENSGALP00000042597,ENSGALP00000043092	MYD88,TLR3
PMID:24653722	(2014) IFITs: Emerging Roles as Key Anti-Viral Proteins.	2	6	0.00055	ENSGALP00000035830,ENSGALP00000043092	TLR3,TLR7
PMID:24911931	(2014) 3T3-L1 preadipocytes exhibit heightened monocyte-chemoattractant protein-1 response to acute fatty acid exposure.	2	6	0.00055	ENSGALP00000011319,ENSGALP00000038134	TLR2-2,TLR4
PMID:24976762	(2014) The Protective Role of TLR3 and TLR9 Ligands in Human Pharyngeal Epithelial Cells Infected with Influenza A Virus.	2	6	0.00055	ENSGALP00000035830,ENSGALP00000043092	TLR3,TLR7
PMID:25722959	(....) Is The Allergen Really Needed in Allergy Immunotherapy?	2	6	0.00055	ENSGALP00000035830,ENSGALP00000042597	MYD88,TLR7
PMID:26320630	(2015) Studies of the TLR4-associated protein MD-2 using yeast-display and mutational analyses.	2	6	0.00055	ENSGALP00000011319,ENSGALP00000038134	TLR2-2,TLR4
PMID:26633525	(2015) Models and Methods to Investigate Acute Stress Responses in Cattle.	2	6	0.00055	ENSGALP00000011319,ENSGALP00000038134	TLR2-2,TLR4
PMID:26664692	(2015) Expression of TLR24 in the sperm-storing oviduct of the Chinese soft-shelled turtle Pelodiscus sinensis during hibernation season.	2	6	0.00055	ENSGALP00000011319,ENSGALP00000038134	TLR2-2,TLR4
PMID:26740130	(2016) Effect of yeast-derived products and distillers dried grains with solubles (DDGS) on growth performance, gut morphology, and gene expression of pattern recognition receptors and cytokines in broiler chickens.	2	6	0.00055	ENSGALP00000011319,ENSGALP00000038134	TLR2-2,TLR4
PMID:26797426	(2016) Roles of Toll-like receptors 2 and 6 in the inflammatory response to Mycoplasma gallisepticum infection in DF-1 cells and in chicken embryos.	2	6	0.00055	ENSGALP00000038134,ENSGALP00000042597	MYD88,TLR2-2
PMID:26849209	(2016) Evaluation of the Therapeutic Potential of Anti-TLR4-Antibody MTS510 in Experimental Stroke and Significance of Different Routes of Application.	2	6	0.00055	ENSGALP00000011319,ENSGALP00000038134	TLR2-2,TLR4
PMID:26920710	(2016) Responses of the Toll-like receptor and melanoma differentiation-associated protein 5 signaling pathways to avian infectious bronchitis virus infection in chicks.	2	6	0.00055	ENSGALP00000012873,ENSGALP00000035830	TLR7,TRAF6
PMID:27524984	(2016) Topical CpG Oligodeoxynucleotide Adjuvant Enhances the Adaptive Immune Response against Influenza A Infections.	2	6	0.00055	ENSGALP00000011319,ENSGALP00000035830	TLR4,TLR7
PMID:27982050	(2016) Immune Responses Induced by Recombinant Bacillus Subtilis Expressing the Hemagglutinin Protein of H5N1 in chickens.	2	6	0.00055	ENSGALP00000011319,ENSGALP00000038134	TLR2-2,TLR4
PMID:2833505	(1988) Xenopus laevis integrins. Structural conservation and evolutionary divergence of integrin beta subunits.	2	6	0.00055	ENSGALP00000000518,ENSGALP00000012130	ITGB2,ITGB3
PMID:28848530	(2017) Protection Mechanism of Clostridium butyricum against Salmonella Enteritidis Infection in Broilers.	2	6	0.00055	ENSGALP00000011319,ENSGALP00000042597	MYD88,TLR4
PMID:29091025	(2017) Reactive oxygen species-dependent TollNF-KB activation in the Drosophila hematopoietic niche confers resistance to wasp parasitism.	2	6	0.00055	ENSGALP00000011319,ENSGALP00000042597	MYD88,TLR4
PMID:29255453	(2017) Zoonotic Hepatitis E Virus: An Ignored Risk for Public Health.	2	6	0.00055	ENSGALP00000035830,ENSGALP00000043092	TLR3,TLR7
PMID:29511165	(2018) Food allergen triggers are increased in children with the TSLP risk allele and eosinophilic esophagitis.	2	6	0.00055	ENSGALP00000035870,ENSGALP00000043092	IL7,TLR3
PMID:29649166	(2018) Tumor-Associated Macrophages and Mast Cells Positive to Tryptase Are Correlated with Angiogenesis in Surgically-Treated Gastric Cancer Patients.	2	6	0.00055	ENSGALP00000011319,ENSGALP00000042597	MYD88,TLR4
PMID:29719531	(2018) Characterization of Chicken Tumor Necrosis Factor-Alfa, a Long Missed Cytokine in Birds.	2	6	0.00055	ENSGALP00000011319,ENSGALP00000035830	TLR4,TLR7
PMID:29791868	(2018) Ontogeny of white matter, toll-like receptor expression, and motor skills in the neonatal ferret.	2	6	0.00055	ENSGALP00000011319,ENSGALP00000043092	TLR3,TLR4
PMID:30011851	(2018) Recent Advances in the Synthesis of Glycoconjugates for Vaccine Development.	2	6	0.00055	ENSGALP00000011319,ENSGALP00000038134	TLR2-2,TLR4
PMID:30261204	(2018) Investigation of tunable acetalated dextran microparticle platform to optimize M2e-based influenza vaccine efficacy.	2	6	0.00055	ENSGALP00000011319,ENSGALP00000035830	TLR4,TLR7
PMID:30552359	(2018) Avian Toll-like receptor allelic diversity far exceeds human polymorphism: an insight from domestic chicken breeds.	2	6	0.00055	ENSGALP00000013260,ENSGALP00000038134	TLR15,TLR2-2
PMID:31192265	(2019) The Postembryonic Development of the Immunological Barrier in the Chicken Spleens.	2	6	0.00055	ENSGALP00000011319,ENSGALP00000038134	TLR2-2,TLR4
PMID:31238913	(2019) PFOS mediates immunomodulation in an avian cell line that can be mitigated via a virus infection.	2	6	0.00055	ENSGALP00000042597,ENSGALP00000043092	MYD88,TLR3
PMID:32179470	(2020) TLR9 Polymorphisms Might Contribute to the Ethnicity Bias for EBV-Infected Nasopharyngeal Carcinoma.	2	6	0.00055	ENSGALP00000012873,ENSGALP00000042597	MYD88,TRAF6
PMID:32199176	(2020) Salmonella infection induced intestinal crypt hyperplasia through Wntbeta-catenin pathway in chicken.	2	6	0.00055	ENSGALP00000011319,ENSGALP00000042597	MYD88,TLR4
PMID:32204385	(2020) Hepatic Inflammatory Response to Exogenous LPS Challenge is Exacerbated in Broilers with Fatty Liver Disease.	2	6	0.00055	ENSGALP00000011319,ENSGALP00000042597	MYD88,TLR4
PMID:32266141	(2020) NAMPT and NAPRT: Two Metabolic Enzymes With Key Roles in Inflammation.	3	46	0.00055	ENSGALP00000011319,ENSGALP00000035870,ENSGALP00000042597	IL7,MYD88,TLR4
PMID:30049987	(2018) Ovarian Cancer Immunotherapy: Preclinical Models and Emerging Therapeutics.	3	47	0.00059	ENSGALP00000011319,ENSGALP00000035870,ENSGALP00000042597	IL7,MYD88,TLR4
PMID:23787158	(2013) Pre-B cell colony enhancing factor (PBEF), a cytokine with multiple physiological functions.	3	48	0.00062	ENSGALP00000011319,ENSGALP00000035870,ENSGALP00000038134	IL7,TLR2-2,TLR4
PMID:29925006	(2018) Notch Signaling Facilitates In Vitro Generation of Cross-Presenting Classical Dendritic Cells.	3	49	0.00066	ENSGALP00000011319,ENSGALP00000036433,ENSGALP00000043092	F13A1,TLR3,TLR4
PMID:16335810	(2005) Lipopolysaccharide binding proteinCD14 TLR4-dependent recognition of salmonella LPS induces the functional activation of chicken heterophils and up-regulation of pro-inflammatory cytokine and chemokine gene expression in these cells.	2	7	0.00067	ENSGALP00000011319,ENSGALP00000038134	TLR2-2,TLR4
PMID:21272606	(2011) Delivery route, MyD88 signaling and cross-priming events determine the anti-tumor efficacy of an adenovirus based melanoma vaccine.	2	7	0.00067	ENSGALP00000027049,ENSGALP00000042597	IL1R1,MYD88
PMID:21557972	(2011) A novel chicken lung epithelial cell line: characterization and response to low pathogenicity avian influenza virus.	2	7	0.00067	ENSGALP00000011319,ENSGALP00000043092	TLR3,TLR4
PMID:22412157	(2012) Structural insight into MR1-mediated recognition of the mucosal associated invariant T cell receptor.	2	7	0.00067	ENSGALP00000011319,ENSGALP00000038134	TLR2-2,TLR4
PMID:23275606	(2013) Antigen-specific regulation of IgE antibodies by non-antigen-specific GammaDelta T cells.	2	7	0.00067	ENSGALP00000011319,ENSGALP00000042597	MYD88,TLR4
PMID:23636320	(2013) The TLR4 antagonist Eritoran protects mice from lethal influenza infection.	2	7	0.00067	ENSGALP00000011319,ENSGALP00000038134	TLR2-2,TLR4
PMID:23863505	(2013) Modulation of chicken intestinal immune gene expression by small cationic peptides as feed additives during the first week posthatch.	2	7	0.00067	ENSGALP00000011319,ENSGALP00000013260	TLR15,TLR4
PMID:24066864	(2013) Variations in ncRNA gene LOC284889 and MIF-794CATT repeats are associated with malaria susceptibility in Indian populations.	2	7	0.00067	ENSGALP00000011319,ENSGALP00000038134	TLR2-2,TLR4
PMID:24441474	(2014) The promise and challenge of high-throughput sequencing of the antibody repertoire.	2	7	0.00067	ENSGALP00000011319,ENSGALP00000035830	TLR4,TLR7
PMID:24505352	(2014) Fine-mapping and phenotypic analysis of the Ity3 Salmonella susceptibility locus identify a complex genetic structure.	2	7	0.00067	ENSGALP00000011319,ENSGALP00000015286	TLR4,TLR5
PMID:24637645	(2014) In vitro exposure to Escherichia coli decreases ion conductance in the jejunal epithelium of broiler chickens.	2	7	0.00067	ENSGALP00000011319,ENSGALP00000038134	TLR2-2,TLR4
PMID:25181320	(2014) Supplemental dietary L-arginine attenuates intestinal mucosal disruption during a coccidial vaccine challenge in broiler chickens.	2	7	0.00067	ENSGALP00000011319,ENSGALP00000042597	MYD88,TLR4
PMID:25417198	(2015) TLR-4 signalling pathway: MyD88 independent pathway up-regulation in chicken breeds upon LPS treatment.	2	7	0.00067	ENSGALP00000011319,ENSGALP00000012873	TLR4,TRAF6
PMID:25888238	(2015) Copy number variations in high and low fertility breeding boars.	2	7	0.00067	ENSGALP00000038134,ENSGALP00000043092	TLR2-2,TLR3
PMID:26057557	(2015) A Critical Role for CLSP2 in the Modulation of Antifungal Immune Response in Mosquitoes.	2	7	0.00067	ENSGALP00000012873,ENSGALP00000042597	MYD88,TRAF6
PMID:26779445	(2015) From the Outside-In: The Francisella tularensis Envelope and Virulence.	2	7	0.00067	ENSGALP00000011319,ENSGALP00000038134	TLR2-2,TLR4
PMID:27303676	(2016) Novel Immunomodulatory Flagellin-Like Protein FlaC in Campylobacter jejuni and Other Campylobacterales.	2	7	0.00067	ENSGALP00000011319,ENSGALP00000038134	TLR2-2,TLR4
PMID:27317338	(2016) Collagen-induced arthritis and imiquimod-induced psoriasis develop independently of interleukin-33.	2	7	0.00067	ENSGALP00000035830,ENSGALP00000042597	MYD88,TLR7
PMID:28085062	(2017) Radix isatidis Polysaccharides Inhibit Influenza a Virus and Influenza A Virus-Induced Inflammation via Suppression of Host TLR3 Signaling In Vitro.	2	7	0.00067	ENSGALP00000011319,ENSGALP00000043092	TLR3,TLR4
PMID:28611853	(2017) An Unsettled Debate About the Potential Role of Infection in Pathogenesis of Atherosclerosis.	2	7	0.00067	ENSGALP00000011319,ENSGALP00000038134	TLR2-2,TLR4
PMID:29247203	(2017) Host species adaptation of TLR5 signalling and flagellin recognition.	2	7	0.00067	ENSGALP00000012873,ENSGALP00000042597	MYD88,TRAF6
PMID:30127450	(2018) DNA-launched RNA replicon vaccines induce potent anti-Ebolavirus immune responses that can be further improved by a recombinant MVA boost.	2	7	0.00067	ENSGALP00000035830,ENSGALP00000043092	TLR3,TLR7
PMID:30365012	(2019) Effects of pre-hatch thermal manipulation and post-hatch acute heat stress on the mRNA expression of interleukin-6 and genes involved in its induction pathways in 2 broiler chicken breeds.	2	7	0.00067	ENSGALP00000011319,ENSGALP00000038134	TLR2-2,TLR4
PMID:30371212	(2018) Small Molecule Derived From Carboxyethylpyrrole Protein Adducts Promotes Angiogenesis in a Mouse Model of Peripheral Arterial Disease.	2	7	0.00067	ENSGALP00000038134,ENSGALP00000042597	MYD88,TLR2-2
PMID:30513304	(2019) Comparative models for human nasal infections and immunity.	2	7	0.00067	ENSGALP00000011319,ENSGALP00000043092	TLR3,TLR4
PMID:30590708	(2019) Effect of carvacrol essential oils on immune response and inflammation-related genes expression in broilers challenged by lipopolysaccharide.	2	7	0.00067	ENSGALP00000011319,ENSGALP00000038134	TLR2-2,TLR4
PMID:30964858	(2019) Infection-generated electric field in gut epithelium drives bidirectional migration of macrophages.	2	7	0.00067	ENSGALP00000011319,ENSGALP00000038134	TLR2-2,TLR4
PMID:3128792	(1988) The lethal myospheroid gene of Drosophila encodes a membrane protein homologous to vertebrate integrin beta subunits.	2	7	0.00067	ENSGALP00000000518,ENSGALP00000012130	ITGB2,ITGB3
PMID:31352103	(2019) Atmospheric H2S triggers immune damage by activating the TLR-7MyD88NF-kappaB pathway and NLRP3 inflammasome in broiler thymus.	2	7	0.00067	ENSGALP00000035830,ENSGALP00000042597	MYD88,TLR7
PMID:31437523	(2020) MicroRNA gga-miR-10a-mediated transcriptional regulation of the immune genes in necrotic enteritis afflicted chickens.	2	7	0.00067	ENSGALP00000012873,ENSGALP00000042597	MYD88,TRAF6
PMID:31908503	(2019) Baicalin Attenuates Mycoplasma gallisepticum-Induced Inflammation via Inhibition of the TLR2-NF-kappaB Pathway in Chicken and DF-1 Cells.	2	7	0.00067	ENSGALP00000038134,ENSGALP00000042597	MYD88,TLR2-2
PMID:31964916	(2020) MicroRNA and mRNA interactions coordinate the immune response in non-lethal heat stressed Litopenaeus vannamei against AHPND-causing Vibrio parahaemolyticus.	2	7	0.00067	ENSGALP00000012873,ENSGALP00000042597	MYD88,TRAF6
PMID:32272881	(2020) Identification of key genes and pathways associated with feed efficiency of native chickens based on transcriptome data via bioinformatics analysis.	2	7	0.00067	ENSGALP00000011319,ENSGALP00000037001	RAC2,TLR4
PMID:7542248	(1995) Requirement of the NPXY motif in the integrin beta 3 subunit cytoplasmic tail for melanoma cell migration in vitro and in vivo.	2	7	0.00067	ENSGALP00000000518,ENSGALP00000012130	ITGB2,ITGB3
PMID:9789682	(1998) The membrane proximal region of the integrin beta cytoplasmic domain can mediate oligomerization.	2	7	0.00067	ENSGALP00000000518,ENSGALP00000012130	ITGB2,ITGB3
PMID:19647099	(2009) Systems-based candidate genes for human response to influenza infection.	3	51	0.00071	ENSGALP00000035830,ENSGALP00000042597,ENSGALP00000043092	MYD88,TLR3,TLR7
PMID:23509712	(2013) The importance of the nurse cells and regulatory cells in the control of T lymphocyte responses.	3	52	0.00075	ENSGALP00000011319,ENSGALP00000035870,ENSGALP00000038134	IL7,TLR2-2,TLR4
PMID:12667295	(2003) [Inhibition of angiogenesis properties by SZ-21].	2	8	0.00081	ENSGALP00000000518,ENSGALP00000012130	ITGB2,ITGB3
PMID:1376731	(1992) Identification of amino acid sequences in the integrin beta 1 cytoplasmic domain implicated in cytoskeletal association.	2	8	0.00081	ENSGALP00000000518,ENSGALP00000012130	ITGB2,ITGB3
PMID:18723061	(2008) Influenza-induced expression of functional tumor necrosis factor-related apoptosis-inducing ligand on human peripheral blood mononuclear cells.	2	8	0.00081	ENSGALP00000035830,ENSGALP00000043092	TLR3,TLR7
PMID:19841748	(2009) Gnotobiotic IL-10; NF-kappaB mice develop rapid and severe colitis following Campylobacter jejuni infection.	2	8	0.00081	ENSGALP00000011319,ENSGALP00000042597	MYD88,TLR4
PMID:20435925	(2010) Surfactant protein D-mediated decrease of allergen-induced inflammation is dependent upon CTLA4.	2	8	0.00081	ENSGALP00000011319,ENSGALP00000038134	TLR2-2,TLR4
PMID:20884872	(2010) Paracrine stimulation of endothelial cell motility and angiogenesis by platelet-derived deoxyribose-1-phosphate.	2	8	0.00081	ENSGALP00000000518,ENSGALP00000012130	ITGB2,ITGB3
PMID:21729770	(2011) Systemic inflammation impairs respiratory chemoreflexes and plasticity.	2	8	0.00081	ENSGALP00000011319,ENSGALP00000038134	TLR2-2,TLR4
PMID:21827663	(2011) TLR4 mutation reduces microglial activation, increases ABeta deposits and exacerbates cognitive deficits in a mouse model of Alzheimer's disease.	2	8	0.00081	ENSGALP00000011319,ENSGALP00000038134	TLR2-2,TLR4
PMID:21998693	(2011) Gamma-irradiated influenza virus uniquely induces IFN-I mediated lymphocyte activation independent of the TLR7MyD88 pathway.	2	8	0.00081	ENSGALP00000035830,ENSGALP00000043092	TLR3,TLR7
PMID:22758390	(2012) The Beta3-integrin ligand of Borrelia burgdorferi is critical for infection of mice but not ticks.	2	8	0.00081	ENSGALP00000038134,ENSGALP00000042597	MYD88,TLR2-2
PMID:22848581	(2012) Assessment of roles for calreticulin in the cross-presentation of soluble and bead-associated antigens.	2	8	0.00081	ENSGALP00000011319,ENSGALP00000038134	TLR2-2,TLR4
PMID:23069847	(2013) Genetic complexity of the human surfactant-associated proteins SP-A1 and SP-A2.	2	8	0.00081	ENSGALP00000011319,ENSGALP00000038134	TLR2-2,TLR4
PMID:23267016	(2013) B cell survival, surface BCR and BAFFR expression, CD74 metabolism, and CD8- dendritic cells require the intramembrane endopeptidase SPPL2A.	2	8	0.00081	ENSGALP00000035870,ENSGALP00000041692	IL7,VAV1
PMID:23270170	(2012) Effect of stored product mite extracts on human dermal microvascular endothelial cells.	2	8	0.00081	ENSGALP00000011319,ENSGALP00000038134	TLR2-2,TLR4
PMID:23587661	(2013) Cloning and characterization of chicken Alfa5 integrin: endogenous and experimental expression in early chicken embryos.	2	8	0.00081	ENSGALP00000000518,ENSGALP00000012130	ITGB2,ITGB3
PMID:23782222	(2013) Differences in highly pathogenic avian influenza viral pathogenesis and associated early inflammatory response in chickens and ducks.	2	8	0.00081	ENSGALP00000035830,ENSGALP00000043092	TLR3,TLR7
PMID:23857504	(2013) The effects of MyD88 deficiency on disease phenotype in dysferlin-deficient AJ mice: role of endogenous TLR ligands.	2	8	0.00081	ENSGALP00000011319,ENSGALP00000035830	TLR4,TLR7
PMID:23948712	(2013) Olfactory bulb and hypothalamic acute-phase responses to influenza virus: effects of immunization.	2	8	0.00081	ENSGALP00000035830,ENSGALP00000043092	TLR3,TLR7
PMID:23989890	(2013) Recombinant Salmonella enterica serovar Typhimurium as a vaccine vector for HIV-1 Gag.	2	8	0.00081	ENSGALP00000011319,ENSGALP00000015286	TLR4,TLR5
PMID:23991199	(2013) The complete Campylobacter jejuni transcriptome during colonization of a natural host determined by RNAseq.	2	8	0.00081	ENSGALP00000011319,ENSGALP00000038134	TLR2-2,TLR4
PMID:24083086	(2013) Oncolytic vesicular stomatitis virus quantitatively and qualitatively improves primary CD8+ T-cell responses to anticancer vaccines.	2	8	0.00081	ENSGALP00000011319,ENSGALP00000035830	TLR4,TLR7
PMID:24692634	(2014) RIG-I detects mRNA of intracellular Salmonella enterica serovar Typhimurium during bacterial infection.	2	8	0.00081	ENSGALP00000035830,ENSGALP00000042597	MYD88,TLR7
PMID:25019045	(2014) Ganoderma formosanum polysaccharides attenuate Th2 inflammation and airway hyperresponsiveness in a murine model of allergic asthma.	2	8	0.00081	ENSGALP00000011319,ENSGALP00000035830	TLR4,TLR7
PMID:25044405	(2014) Production of IgG autoantibody requires expression of activation-induced deaminase in early-developing B cells in a mouse model of SLE.	2	8	0.00081	ENSGALP00000035830,ENSGALP00000042597	MYD88,TLR7
PMID:25437614	(2014) Heat Shock Proteins: Intestinal Gatekeepers that Are Influenced by Dietary Components and the Gut Microbiota.	2	8	0.00081	ENSGALP00000011319,ENSGALP00000038134	TLR2-2,TLR4
PMID:25533784	(2015) Reservoir host immune responses to emerging zoonotic viruses.	2	8	0.00081	ENSGALP00000035830,ENSGALP00000043092	TLR3,TLR7
PMID:26125492	(2015) Modified mRNA as an alternative to plasmid DNA (pDNA) for transcript replacement and vaccination therapy.	2	8	0.00081	ENSGALP00000035830,ENSGALP00000043092	TLR3,TLR7
PMID:26132659	(2015) Inference of Low and High-Grade Glioma Gene Regulatory Networks Delineates the Role of Rnd3 in Establishing Multiple Hallmarks of Cancer.	3	54	0.00081	ENSGALP00000011319,ENSGALP00000027049,ENSGALP00000037001	IL1R1,RAC2,TLR4
PMID:26200783	(2015) Virulence of Group A Streptococci Is Enhanced by Human Complement Inhibitors.	2	8	0.00081	ENSGALP00000011319,ENSGALP00000038134	TLR2-2,TLR4
PMID:26201072	(2015) The Role of High Mobility Group Box 1 Protein (HMGB1) in the Immunopathology of Experimental Pulmonary Tuberculosis.	2	8	0.00081	ENSGALP00000011319,ENSGALP00000038134	TLR2-2,TLR4
PMID:26693381	(2015) An Evolutionary Perspective of Nutrition and Inflammation as Mechanisms of Cardiovascular Disease.	2	8	0.00081	ENSGALP00000011319,ENSGALP00000038134	TLR2-2,TLR4
PMID:26787921	(2016) Effect of yeast-derived products and distillers dried grains with solubles (DDGS) on antibody-mediated immune response and gene expression of pattern recognition receptors and cytokines in broiler chickens immunized with T-cell dependent ...	2	8	0.00081	ENSGALP00000011319,ENSGALP00000038134	TLR2-2,TLR4
PMID:27143776	(2016) Effect of yeast-derived products on systemic innate immune response of broiler chickens following a lipopolysaccharide challenge.	2	8	0.00081	ENSGALP00000011319,ENSGALP00000038134	TLR2-2,TLR4
PMID:27252374	(2016) The immunomodulatory effect of vitamin D in chickens is dose-dependent and influenced by calcium and phosphorus levels.	2	8	0.00081	ENSGALP00000011319,ENSGALP00000038134	TLR2-2,TLR4
PMID:27465811	(2016) Associations between male testosterone and immune function in a pathogenically stressed forager-horticultural population.	2	8	0.00081	ENSGALP00000011319,ENSGALP00000035870	IL7,TLR4
PMID:27508930	(2016) Lipophosphoglycans from Leishmania amazonensis Strains Display Immunomodulatory Properties via TLR4 and Do Not Affect Sand Fly Infection.	2	8	0.00081	ENSGALP00000011319,ENSGALP00000042597	MYD88,TLR4
PMID:27538577	(2016) TLR2 and TLR9 modulate enteric nervous system inflammatory responses to lipopolysaccharide.	2	8	0.00081	ENSGALP00000011319,ENSGALP00000038134	TLR2-2,TLR4
PMID:28092666	(2017) Loss of my opioid receptor signaling in nociceptors, but not microglia, abrogates morphine tolerance without disrupting analgesia.	2	8	0.00081	ENSGALP00000011319,ENSGALP00000038134	TLR2-2,TLR4
PMID:28570668	(2017) Cooperative inhibition of RIP1-mediated NF-KB signaling by cytomegalovirus-encoded deubiquitinase and inactive homolog of cellular ribonucleotide reductase large subunit.	2	8	0.00081	ENSGALP00000012873,ENSGALP00000043092	TLR3,TRAF6
PMID:28978105	(2017) Oridonin attenuates the release of pro-inflammatory cytokines in lipopolysaccharide-induced RAW264.7 cells and acute lung injury.	2	8	0.00081	ENSGALP00000011319,ENSGALP00000042597	MYD88,TLR4
PMID:29510476	(2018) Pathogen-Derived Carbohydrate Recognition in Molluscs Immune Defense.	2	8	0.00081	ENSGALP00000035870,ENSGALP00000042597	IL7,MYD88
PMID:30823888	(2019) Study of the underlying mechanisms and consequences of pathogenicity differences between two in vitro selected G1-H9N2 clones originating from a single isolate.	2	8	0.00081	ENSGALP00000035830,ENSGALP00000043092	TLR3,TLR7
PMID:30906301	(2019) Toll-Like Receptor 7 Enhances Rabies Virus-Induced Humoral Immunity by Facilitating the Formation of Germinal Centers.	2	8	0.00081	ENSGALP00000035830,ENSGALP00000043092	TLR3,TLR7
PMID:30984200	(2019) Cross-Protective Potential and Protection-Relevant Immune Mechanisms of Whole Inactivated Influenza Virus Vaccines Are Determined by Adjuvants and Route of Immunization.	2	8	0.00081	ENSGALP00000035830,ENSGALP00000043092	TLR3,TLR7
PMID:30987146	(2019) Bridging the Gap between Alzheimer's Disease and Alzheimer's-like Diseases in Animals.	2	8	0.00081	ENSGALP00000011319,ENSGALP00000038134	TLR2-2,TLR4
PMID:31271646	(2019) Repurposing drugs targeting the P2X7 receptor to limit hyperinflammation and disease during influenza virus infection.	2	8	0.00081	ENSGALP00000035830,ENSGALP00000043092	TLR3,TLR7
PMID:31332706	(2020) Inhibition of Lipopolysaccharide-Induced Inflammation of Chicken Liver Tissue by Selenomethionine via TLR4-NF-kappaB-NLRP3 Signaling Pathway.	2	8	0.00081	ENSGALP00000011319,ENSGALP00000042597	MYD88,TLR4
PMID:31428075	(2019) Immune-Related Gene Expression in Ducks Infected With Waterfowl-Origin H5N6 Highly Pathogenic Avian Influenza Viruses.	2	8	0.00081	ENSGALP00000035830,ENSGALP00000043092	TLR3,TLR7
PMID:31736951	(2019) TIR Domain-Containing Adaptor-Inducing Interferon-beta (TRIF) Participates in Antiviral Immune Responses and Hepatic Lipogenesis of Large Yellow Croaker (Larimichthys Crocea).	2	8	0.00081	ENSGALP00000011319,ENSGALP00000043092	TLR3,TLR4
PMID:31769222	(2020) PACAP27 mitigates an age-dependent hippocampal vulnerability to PGJ2-induced spatial learning deficits and neuroinflammation in mice.	2	8	0.00081	ENSGALP00000011319,ENSGALP00000042597	MYD88,TLR4
PMID:31769590	(2020) Cigarette smoke-induced HMGB1 translocation and release contribute to migration and NF-kappaB activation through inducing autophagy in lung macrophages.	2	8	0.00081	ENSGALP00000011319,ENSGALP00000042597	MYD88,TLR4
PMID:31981684	(2020) Selenium-enriched yeast reduces caecal pathological injuries and intervenes changes of the diversity of caecal microbiota caused by Ochratoxin-A in broilers.	2	8	0.00081	ENSGALP00000011319,ENSGALP00000042597	MYD88,TLR4
PMID:32046051	(2020) Host Innate Immune Response of Geese Infected with Clade 2.3.4.4 H5N6 Highly Pathogenic Avian Influenza Viruses.	2	8	0.00081	ENSGALP00000035830,ENSGALP00000043092	TLR3,TLR7
PMID:32211522	(2020) Dietary fiber and chicken microbiome interaction: Where will it lead to?	2	8	0.00081	ENSGALP00000011319,ENSGALP00000042597	MYD88,TLR4
PMID:32391086	(2020) Host responses to Clostridium perfringens challenge in a chicken model of chronic stress.	2	8	0.00081	ENSGALP00000013260,ENSGALP00000038134	TLR15,TLR2-2
PMID:32600413	(2020) Newcastle disease virus induces testicular damage and disrupts steroidogenesis in specific pathogen free roosters.	2	8	0.00081	ENSGALP00000035830,ENSGALP00000043092	TLR3,TLR7
PMID:3332662	(1987) Integrin, a transmembrane glycoprotein complex mediating cell-substratum adhesion.	2	8	0.00081	ENSGALP00000000518,ENSGALP00000012130	ITGB2,ITGB3
PMID:25674539	(2015) TGF-Beta1-Induced Epithelial-Mesenchymal Transition Promotes MonocyteMacrophage Properties in Breast Cancer Cells.	3	57	0.00092	ENSGALP00000000518,ENSGALP00000023991,ENSGALP00000024180	FYN,ITGA2,ITGB3
PMID:16230475	(2005) CD4+CD25+ regulatory T cells inhibit natural killer cell functions in a transforming growth factor-beta-dependent manner.	2	9	0.00093	ENSGALP00000011319,ENSGALP00000035870	IL7,TLR4
PMID:17706776	(2007) Biological characters of bats in relation to natural reservoir of emerging viruses.	2	9	0.00093	ENSGALP00000035830,ENSGALP00000043092	TLR3,TLR7
PMID:18066067	(2008) Akirins are highly conserved nuclear proteins required for NF-kappaB-dependent gene expression in drosophila and mice.	2	9	0.00093	ENSGALP00000012873,ENSGALP00000042597	MYD88,TRAF6
PMID:1851093	(1991) An abundant chick gizzard integrin is the avian alpha 1 beta 1 integrin heterodimer and functions as a divalent cation-dependent collagen IV receptor.	2	9	0.00093	ENSGALP00000000518,ENSGALP00000012130	ITGB2,ITGB3
PMID:18801551	(2008) Analysis of cytokine secretion from human plasmacytoid dendritic cells infected with H5N1 or low-pathogenicity influenza viruses.	2	9	0.00093	ENSGALP00000035830,ENSGALP00000042597	MYD88,TLR7
PMID:19494277	(2009) Direct stimulation of tlr5++ CD11c+ cells is necessary for the adjuvant activity of flagellin.	2	9	0.00093	ENSGALP00000015286,ENSGALP00000042597	MYD88,TLR5
PMID:20947017	(2010) The structure of the talinintegrin complex at a lipid bilayer: an NMR and MD simulation study.	2	9	0.00093	ENSGALP00000000518,ENSGALP00000012130	ITGB2,ITGB3
PMID:21704311	(2011) RahU: an inducible and functionally pleiotropic protein in Pseudomonas aeruginosa modulates innate immunity and inflammation in host cells.	2	9	0.00093	ENSGALP00000011319,ENSGALP00000038134	TLR2-2,TLR4
PMID:22264349	(2012) Lactobacillus rhamnosus GR-1 enhances NF-kappaB activation in Escherichia coli-stimulated urinary bladder cells through TLR4.	2	9	0.00093	ENSGALP00000011319,ENSGALP00000038134	TLR2-2,TLR4
PMID:22589098	(2012) Prediction and comparison of Salmonella-human and Salmonella-Arabidopsis interactomes.	2	9	0.00093	ENSGALP00000011319,ENSGALP00000043092	TLR3,TLR4
PMID:22768144	(2012) Sex differences in the response to viral infections: TLR8 and TLR9 ligand stimulation induce higher IL10 production in males.	2	9	0.00093	ENSGALP00000035830,ENSGALP00000043092	TLR3,TLR7
PMID:22941410	(2012) Microbial regulation of allergic responses to food.	2	9	0.00093	ENSGALP00000011319,ENSGALP00000038134	TLR2-2,TLR4
PMID:23237909	(2012) The maintenance of epigenetic states by p53: the guardian of the epigenome.	2	9	0.00093	ENSGALP00000035830,ENSGALP00000043092	TLR3,TLR7
PMID:23499671	(2013) Moving H5N1 studies into the era of systems biology.	2	9	0.00093	ENSGALP00000011319,ENSGALP00000043092	TLR3,TLR4
PMID:23527091	(2013) M2e-displaying virus-like particles with associated RNA promote T helper 1 type adaptive immunity against influenza A.	2	9	0.00093	ENSGALP00000042597,ENSGALP00000043092	MYD88,TLR3
PMID:23933004	(2013) Host genetic determinants of influenza pathogenicity.	2	9	0.00093	ENSGALP00000011319,ENSGALP00000043092	TLR3,TLR4
PMID:24010941	(2013) Inactivated influenza virus vaccine is efficient and reduces IL-4 and IL-6 in allergic asthma mice.	2	9	0.00093	ENSGALP00000035830,ENSGALP00000042597	MYD88,TLR7
PMID:24391897	(2013) Ovocalyxin-36 is a pattern recognition protein in chicken eggshell membranes.	2	9	0.00093	ENSGALP00000011319,ENSGALP00000038134	TLR2-2,TLR4
PMID:24486351	(2014) Live attenuated influenza vaccine strains elicit a greater innate immune response than antigenically-matched seasonal influenza viruses during infection of human nasal epithelial cell cultures.	2	9	0.00093	ENSGALP00000035830,ENSGALP00000043092	TLR3,TLR7
PMID:2451120	(1988) An integral membrane protein antigen associated with the membrane attachment sites of actin microfilaments is identified as an integrin beta-chain.	2	9	0.00093	ENSGALP00000000518,ENSGALP00000012130	ITGB2,ITGB3
PMID:24551070	(2014) Release of neuronal HMGB1 by ethanol through decreased HDAC activity activates brain neuroimmune signaling.	2	9	0.00093	ENSGALP00000011319,ENSGALP00000038134	TLR2-2,TLR4
PMID:24580811	(2014) Proteogenomics of selective susceptibility to endotoxin using circulating acute phase biomarkers and bioassay development in sheep: a review.	2	9	0.00093	ENSGALP00000011319,ENSGALP00000012873	TLR4,TRAF6
PMID:24841130	(2014) Fighting a losing battle: vigorous immune response countered by pathogen suppression of host defenses in the chytridiomycosis-susceptible frog Atelopus zeteki.	2	9	0.00093	ENSGALP00000015286,ENSGALP00000038134	TLR2-2,TLR5
PMID:25280959	(2015) Clinical applications of remote ischaemic preconditioning in native and transplant acute kidney injury.	2	9	0.00093	ENSGALP00000011319,ENSGALP00000038134	TLR2-2,TLR4
PMID:25360750	(2014) Biologically active polymers from spontaneous carotenoid oxidation: a new frontier in carotenoid activity.	2	9	0.00093	ENSGALP00000011319,ENSGALP00000038134	TLR2-2,TLR4
PMID:25610463	(2014) The Antiviral Effect of High-Molecular Weight Poly-Gamma-Glutamate against Newcastle Disease Virus on Murine Macrophage Cells.	2	9	0.00093	ENSGALP00000011319,ENSGALP00000042597	MYD88,TLR4
PMID:25801431	(2015) T cell-extrinsic CD18 attenuates antigen-dependent CD4+ T cell activation in vivo.	2	9	0.00093	ENSGALP00000011319,ENSGALP00000042597	MYD88,TLR4
PMID:25856635	(2015) In ovo delivery of CpG DNA reduces avian infectious laryngotracheitis virus induced mortality and morbidity.	2	9	0.00093	ENSGALP00000013260,ENSGALP00000043092	TLR15,TLR3
PMID:25874566	(2015) A 90-day toxicology study of meat from genetically modified sheep overexpressing TLR4 in Sprague-Dawley rats.	2	9	0.00093	ENSGALP00000011319,ENSGALP00000042597	MYD88,TLR4
PMID:25876455	(2015) MiR-27a ameliorates inflammatory damage to the blood-spinal cord barrier after spinal cord ischemia: reperfusion injury in rats by downregulating TICAM-2 of the TLR4 signaling pathway.	2	9	0.00093	ENSGALP00000011319,ENSGALP00000042597	MYD88,TLR4
PMID:26096733	(2015) Cross-Scale Integrin Regulation Organizes ECM and Tissue Topology.	2	9	0.00093	ENSGALP00000004173,ENSGALP00000016120	ITGAV,RAP1B
PMID:26273144	(2015) Bone Components Downregulate Expression of Toll-Like Receptor 4 on the Surface of Human Monocytic U937 Cells: A Cell Model for Postfracture Immune Dysfunction.	2	9	0.00093	ENSGALP00000011319,ENSGALP00000038134	TLR2-2,TLR4
PMID:26405176	(2015) Deletion of caspase-8 in mouse myeloid cells blocks microglia pro-inflammatory activation and confers protection in MPTP neurodegeneration model.	2	9	0.00093	ENSGALP00000011319,ENSGALP00000043092	TLR3,TLR4
PMID:26450592	(2015) Identification of immunity-related genes in the larvae of Protaetia brevitarsis seulensis (Coleoptera: Cetoniidae) by a next-generation sequencing-based transcriptome analysis.	2	9	0.00093	ENSGALP00000011319,ENSGALP00000043092	TLR3,TLR4
PMID:26550577	(2015) Glutamine may repress the weak LPS and enhance the strong heat shock induction of monocyte and lymphocyte HSP72 proteins but may not modulate the HSP72 mRNA in patients with sepsis or trauma.	2	9	0.00093	ENSGALP00000011319,ENSGALP00000038134	TLR2-2,TLR4
PMID:27243975	(2016) HMGB1 Induces Secretion of Matrix Vesicles by Macrophages to Enhance Ectopic Mineralization.	2	9	0.00093	ENSGALP00000011319,ENSGALP00000038134	TLR2-2,TLR4
PMID:27446066	(2016) The mRNA and Proteins Expression Levels Analysis of TC-1 Cells Immune Response to H9N2 Avian Influenza Virus.	2	9	0.00093	ENSGALP00000035830,ENSGALP00000043092	TLR3,TLR7
PMID:27566466	(2017) Emerging facets of prokaryotic glycosylation.	2	9	0.00093	ENSGALP00000015286,ENSGALP00000038134	TLR2-2,TLR5
PMID:27698623	(2016) Striking a Balance with Help from our Little Friends - How the Gut Microbiota Contributes to Immune Homeostasis.	2	9	0.00093	ENSGALP00000011319,ENSGALP00000042597	MYD88,TLR4
PMID:28652560	(2017) Zymosan A enhances humoral immune responses to soluble protein in chickens.	2	9	0.00093	ENSGALP00000038134,ENSGALP00000043092	TLR2-2,TLR3
PMID:29229937	(2017) CpG-oligodeoxynucleotides developed for grouper toll-like receptor (TLR) 21s effectively activate mouse and human TLR9s mediated immune responses.	2	9	0.00093	ENSGALP00000013260,ENSGALP00000038134	TLR15,TLR2-2
PMID:29264006	(2017) Mycoplasma pneumoniae infection: Basics.	2	9	0.00093	ENSGALP00000011319,ENSGALP00000038134	TLR2-2,TLR4
PMID:29468148	(2018) Polyamines: Bio-Molecules with Diverse Functions in Plant and Human Health and Disease.	2	9	0.00093	ENSGALP00000011319,ENSGALP00000038134	TLR2-2,TLR4
PMID:29650775	(2018) Mechanotransduction via the LINC complex regulates DNA replication in myonuclei.	2	9	0.00093	ENSGALP00000000518,ENSGALP00000012130	ITGB2,ITGB3
PMID:30234124	(2018) A Comparative Review on Microbiota Manipulation: Lessons From Fish, Plants, Livestock, and Human Research.	2	9	0.00093	ENSGALP00000011319,ENSGALP00000038134	TLR2-2,TLR4
PMID:30327884	(2019) The migration and fusion events related to ROCK activity strongly influence the morphology of chicken embryo intestinal organoids.	2	9	0.00093	ENSGALP00000011319,ENSGALP00000038134	TLR2-2,TLR4
PMID:30678116	(2019) Serotherapy against Voltage-Gated Sodium Channel-Targeting AlfaToxins from Androctonus Scorpion Venom.	2	9	0.00093	ENSGALP00000011319,ENSGALP00000038134	TLR2-2,TLR4
PMID:30863402	(2019) Herpes Simplex Virus Type 2 Immediate Early Protein ICP27 Inhibits IFN-Beta Production in Mucosal Epithelial Cells by Antagonizing IRF3 Activation.	2	9	0.00093	ENSGALP00000035830,ENSGALP00000043092	TLR3,TLR7
PMID:31077206	(2019) Apolipoprotein A5 alleviates LPSD-GalN-induced fulminant liver failure in mice by inhibiting TLR4-mediated NF-KB pathway.	2	9	0.00093	ENSGALP00000011319,ENSGALP00000042597	MYD88,TLR4
PMID:31382606	(2019) Vaccine Adjuvants Derived from Marine Organisms.	2	9	0.00093	ENSGALP00000011319,ENSGALP00000038134	TLR2-2,TLR4
PMID:31737959	(2020) Inhibition of Ctsk modulates periodontitis with arthritis via downregulation of TLR9 and autophagy.	2	9	0.00093	ENSGALP00000012873,ENSGALP00000042597	MYD88,TRAF6
PMID:32198144	(2020) Negative Regulation of TLR Signaling by BCAP Requires Dimerization of Its DBB Domain.	2	9	0.00093	ENSGALP00000035830,ENSGALP00000042597	MYD88,TLR7
PMID:32733155	(2020) Effects of Toll-like Receptor Ligands on the Expression of Proinflammatory Cytokines and Avian beta-defensins in Cultured Chick Intestine.	2	9	0.00093	ENSGALP00000011319,ENSGALP00000038134	TLR2-2,TLR4
PMID:18714022	(2008) Lipopolysaccharide is a direct agonist for platelet RNA splicing.	2	10	0.0011	ENSGALP00000011319,ENSGALP00000038134	TLR2-2,TLR4
PMID:19056129	(2009) The piglet as a model for B cell and immune system development.	2	10	0.0011	ENSGALP00000011319,ENSGALP00000024180	FYN,TLR4
PMID:19139171	(2009) Inflammasome recognition of influenza virus is essential for adaptive immune responses.	2	10	0.0011	ENSGALP00000035830,ENSGALP00000042597	MYD88,TLR7
PMID:19265143	(2009) MHC class Ipeptide transfer between dendritic cells overcomes poor cross-presentation by monocyte-derived APCs that engulf dying cells.	2	10	0.0011	ENSGALP00000035830,ENSGALP00000043092	TLR3,TLR7
PMID:19725916	(2009) The aortic ring model of angiogenesis: a quarter century of search and discovery.	3	63	0.0011	ENSGALP00000011319,ENSGALP00000016120,ENSGALP00000038134	RAP1B,TLR2-2,TLR4
PMID:20001600	(2010) Resilience to bacterial infection: difference between species could be due to proteins in serum.	2	10	0.0011	ENSGALP00000011319,ENSGALP00000038134	TLR2-2,TLR4
PMID:20959152	(2011) Identification and characterisation of the BPILBPPLUNC-like gene repertoire in chickens reveals the absence of a LBP gene.	2	10	0.0011	ENSGALP00000011319,ENSGALP00000042597	MYD88,TLR4
PMID:21624935	(2011) Invariant NKT cells are required for airway inflammation induced by environmental antigens.	2	10	0.0011	ENSGALP00000011319,ENSGALP00000042597	MYD88,TLR4
PMID:21747939	(2011) Immunostimulatory motifs enhance antiviral siRNAs targeting highly pathogenic avian influenza H5N1.	2	10	0.0011	ENSGALP00000035830,ENSGALP00000043092	TLR3,TLR7
PMID:21883803	(2011) Elevated AIM2-mediated pyroptosis triggered by hypercytotoxic Francisella mutant strains is attributed to increased intracellular bacteriolysis.	2	10	0.0011	ENSGALP00000038134,ENSGALP00000042597	MYD88,TLR2-2
PMID:22131422	(2011) CCAATenhancer binding protein-Delta expression by dendritic cells regulates CNS autoimmune inflammatory disease.	2	10	0.0011	ENSGALP00000011319,ENSGALP00000042597	MYD88,TLR4
PMID:22514610	(2012) Genetic resistance to rhabdovirus infection in teleost fish is paralleled to the derived cell resistance status.	2	10	0.0011	ENSGALP00000038134,ENSGALP00000043092	TLR2-2,TLR3
PMID:22799608	(2012) Induction of antigen-specific immune responses in mice by recombinant baculovirus expressing premembrane and envelope proteins of West Nile virus.	2	10	0.0011	ENSGALP00000042597,ENSGALP00000043092	MYD88,TLR3
PMID:22966811	(2012) Illegitimate recombination: an efficient method for random mutagenesis in Mycobacterium avium subsp. hominissuis.	2	10	0.0011	ENSGALP00000038134,ENSGALP00000042597	MYD88,TLR2-2
PMID:23202521	(2012) Insight into alternative approaches for control of avian influenza in poultry, with emphasis on highly pathogenic H5N1.	2	10	0.0011	ENSGALP00000035830,ENSGALP00000043092	TLR3,TLR7
PMID:23630667	(2013) Caspase-1 activity affects AIM2 speck formationstability through a negative feedback loop.	2	10	0.0011	ENSGALP00000038134,ENSGALP00000042597	MYD88,TLR2-2
PMID:23691208	(2013) Toll-like receptor 4 mediates acute lung injury induced by high mobility group box-1.	2	10	0.0011	ENSGALP00000011319,ENSGALP00000042597	MYD88,TLR4
PMID:23724321	(2012) The main Aeromonas pathogenic factors.	2	10	0.0011	ENSGALP00000011319,ENSGALP00000015286	TLR4,TLR5
PMID:24068581	(2014) Contamination of live attenuated vaccines with an infectious feline endogenous retrovirus (RD-114 virus).	2	10	0.0011	ENSGALP00000035830,ENSGALP00000043092	TLR3,TLR7
PMID:24385486	(2013) An internal ligand-bound, metastable state of a leukocyte integrin, AlfaXBeta2.	2	10	0.0011	ENSGALP00000000518,ENSGALP00000012130	ITGB2,ITGB3
PMID:24586740	(2014) Betanu integrin inhibits chronic and high level activation of JNK to repress senescence phenotypes in Drosophila adult midgut.	2	10	0.0011	ENSGALP00000000518,ENSGALP00000012130	ITGB2,ITGB3
PMID:24657784	(2014) H5N1 infection causes rapid mortality and high cytokine levels in chickens compared to ducks.	2	10	0.0011	ENSGALP00000035830,ENSGALP00000043092	TLR3,TLR7
PMID:24829762	(2014) Very small size proteoliposomes abrogate cross-presentation of tumor antigens by myeloid-derived suppressor cells and induce their differentiation to dendritic cells.	2	10	0.0011	ENSGALP00000011319,ENSGALP00000038134	TLR2-2,TLR4
PMID:25038939	(2015) Skin immunization with influenza vaccines.	2	10	0.0011	ENSGALP00000015286,ENSGALP00000035830	TLR5,TLR7
PMID:25445398	(2015) TRAIL receptor deletion in mice suppresses the inflammation of nutrient excess.	2	10	0.0011	ENSGALP00000011319,ENSGALP00000012873	TLR4,TRAF6
PMID:25536932	(2014) Extracellular vesicles in parasitic diseases.	2	10	0.0011	ENSGALP00000011319,ENSGALP00000038134	TLR2-2,TLR4
PMID:25539816	(2015) CD8+ T cells complement antibodies in protecting against yellow fever virus.	2	10	0.0011	ENSGALP00000035830,ENSGALP00000038134	TLR2-2,TLR7
PMID:25811871	(2015) Immune reaction and survivability of salmonella typhimurium and salmonella infantis after infection of primary avian macrophages.	2	10	0.0011	ENSGALP00000011319,ENSGALP00000043092	TLR3,TLR4
PMID:26049802	(2015) Innate immune response of pullets fed diets supplemented with prebiotics and synbiotics.	2	10	0.0011	ENSGALP00000011319,ENSGALP00000038134	TLR2-2,TLR4
PMID:26053067	(2015) Increased Thymic Cell Turnover under Boron Stress May Bypass TLR34 Pathway in African Ostrich.	2	10	0.0011	ENSGALP00000011319,ENSGALP00000043092	TLR3,TLR4
PMID:26155100	(2014) Reactivity of the immunological system of rats stimulated with Biolex-Beta HP after cyclophosphamide immunosuppression.	2	10	0.0011	ENSGALP00000011319,ENSGALP00000038134	TLR2-2,TLR4
PMID:26384331	(2015) Differential Induction of Type I and Type III Interferons by Swine and Human Origin H1N1 Influenza A Viruses in Porcine Airway Epithelial Cells.	2	10	0.0011	ENSGALP00000035830,ENSGALP00000043092	TLR3,TLR7
PMID:26576677	(2015) Genomic prediction and genome-wide association study for dagginess and host internal parasite resistance in New Zealand sheep.	2	10	0.0011	ENSGALP00000000518,ENSGALP00000012130	ITGB2,ITGB3
PMID:26790027	(2016) Blood-Brain Barrier Deterioration and Hippocampal Gene Expression in Polymicrobial Sepsis: An Evaluation of Endothelial MyD88 and the Vagus Nerve.	2	10	0.0011	ENSGALP00000011319,ENSGALP00000042597	MYD88,TLR4
PMID:27043414	(2016) S6K-STING interaction regulates cytosolic DNA-mediated activation of the transcription factor IRF3.	2	10	0.0011	ENSGALP00000011319,ENSGALP00000042597	MYD88,TLR4
PMID:27185259	(2016) Characterization of host responses induced by Toll-like receptor ligands in chicken cecal tonsil cells.	2	10	0.0011	ENSGALP00000011319,ENSGALP00000038134	TLR2-2,TLR4
PMID:27337488	(2016) Uropathogenic Escherichia coli-Associated Exotoxins.	2	10	0.0011	ENSGALP00000011319,ENSGALP00000037001	RAC2,TLR4
PMID:27454254	(2016) Abstracts from the 3rd International Genomic Medicine Conference (3rd IGMC 2015) : Jeddah, Kingdom of Saudi Arabia. 30 November - 3 December 2015.	4	161	0.0011	ENSGALP00000012130,ENSGALP00000020572,ENSGALP00000036433,ENSGALP00000040720	F13A1,ITGB2,PTCH1,TBXA2R
PMID:27826542	(2016) Characterization of Innate Immune Responses of Human Endothelial Cells Induced by Porphyromonas gingivalis and Their Derived Outer Membrane Vesicles.	2	10	0.0011	ENSGALP00000011319,ENSGALP00000038134	TLR2-2,TLR4
PMID:27881702	(2017) Roles of Aluminum Hydroxide and Monophosphoryl Lipid A Adjuvants in Overcoming CD4+ T Cell Deficiency To Induce Isotype-Switched IgG Antibody Responses and Protection by T-Dependent Influenza Vaccine.	2	10	0.0011	ENSGALP00000011319,ENSGALP00000023991	ITGA2,TLR4
PMID:27915988	(2017) Vitamin DVDR, Probiotics, and Gastrointestinal Diseases.	2	10	0.0011	ENSGALP00000011319,ENSGALP00000038134	TLR2-2,TLR4
PMID:28038465	(2017) Viral-host interaction in kidney reveals strategies to escape host immunity and persistently shed virus to the urine.	2	10	0.0011	ENSGALP00000035830,ENSGALP00000043092	TLR3,TLR7
PMID:28100936	(2016) Chitosan Modulates Inflammatory Responses in Rats Infected with Enterotoxigenic Escherichia coli.	2	10	0.0011	ENSGALP00000011319,ENSGALP00000042597	MYD88,TLR4
PMID:28270101	(2017) Deciphering alternative splicing and nonsense-mediated decay modulate expression in primary lymphoid tissues of birds infected with avian pathogenic E. coli (APEC).	2	10	0.0011	ENSGALP00000024180,ENSGALP00000041692	FYN,VAV1
PMID:28274107	(2017) Pathophysiology and Management of Alcoholic Liver Disease: Update 2016.	2	10	0.0011	ENSGALP00000011319,ENSGALP00000042597	MYD88,TLR4
PMID:29299029	(2017) Neutrophil extracellular traps and the dysfunctional innate immune response of cystic fibrosis lung disease: a review.	2	10	0.0011	ENSGALP00000011319,ENSGALP00000038134	TLR2-2,TLR4
PMID:29358938	(2017) Acute Pharmacologic Degradation of a Stable Antigen Enhances Its Direct Presentation on MHC Class I Molecules.	2	10	0.0011	ENSGALP00000011319,ENSGALP00000043092	TLR3,TLR4
PMID:30123107	(2018) Regulation of IL-6 Secretion by Astrocytes via TLR4 in the Fragile X Mouse Model.	2	10	0.0011	ENSGALP00000011319,ENSGALP00000042597	MYD88,TLR4
PMID:30169691	(2019) 16S ribosomal RNA sequencing reveals a modulation of intestinal microbiome and immune response by dietary L-theanine supplementation in broiler chickens.	2	10	0.0011	ENSGALP00000011319,ENSGALP00000038134	TLR2-2,TLR4
PMID:30401976	(2018) The effects of in ovo administration of encapsulated Toll-like receptor 21 ligand as an adjuvant with Marek's disease vaccine.	2	10	0.0011	ENSGALP00000011319,ENSGALP00000043092	TLR3,TLR4
PMID:31100860	(2019) Host-Microbe Interactions and Gut Health in Poultry-Focus on Innate Responses.	2	10	0.0011	ENSGALP00000015286,ENSGALP00000042597	MYD88,TLR5
PMID:31297037	(2019) 'In sickness and in health' - how neutrophil extracellular trap (NET) works in infections, selected diseases and pregnancy.	2	10	0.0011	ENSGALP00000011319,ENSGALP00000035830	TLR4,TLR7
PMID:31447849	(2019) Design and Development of a Novel Peptide for Treating Intestinal Inflammation.	2	10	0.0011	ENSGALP00000011319,ENSGALP00000042597	MYD88,TLR4
PMID:31480411	(2019) Sneaking Out for Happy Hour: Yeast-Based Approaches to Explore and Modulate Immune Response and Immune Evasion.	2	10	0.0011	ENSGALP00000011319,ENSGALP00000038134	TLR2-2,TLR4
PMID:31666085	(2019) Role of non-macrophage cell-derived HMGB1 in oxaliplatin-induced peripheral neuropathy and its prevention by the thrombinthrombomodulin system in rodents: negative impact of anticoagulants.	2	10	0.0011	ENSGALP00000011319,ENSGALP00000015286	TLR4,TLR5
PMID:31888074	(2019) Xenopus Interferon Complex: Inscribing the Amphibiotic Adaption and Species-Specific Pathogenic Pressure in Vertebrate Evolution?	2	10	0.0011	ENSGALP00000011319,ENSGALP00000038134	TLR2-2,TLR4
PMID:31955622	(2020) Select targeting of intracellular Toll-interleukin-1 receptor resistance domains for protection against influenza-induced disease.	2	10	0.0011	ENSGALP00000038134,ENSGALP00000042597	MYD88,TLR2-2
PMID:32180765	(2020) Clostridium butyricum Ameliorates Salmonella Enteritis Induced Inflammation by Enhancing and Improving Immunity of the Intestinal Epithelial Barrier at the Intestinal Mucosal Level.	2	10	0.0011	ENSGALP00000011319,ENSGALP00000042597	MYD88,TLR4
PMID:32867971	(2020) Differential immunomodulatory effect of vitamin D (1,25 (OH)2 D3) on the innate immune response in different types of cells infected in vitro with infectious bursal disease virus.	2	10	0.0011	ENSGALP00000042597,ENSGALP00000043092	MYD88,TLR3
PMID:9480991	(1998) Inhibition of the B cell by CD22: a requirement for Lyn.	2	10	0.0011	ENSGALP00000024180,ENSGALP00000041692	FYN,VAV1
PMID:14610042	(2003) The B cell antigen receptor controls integrin activity through Btk and PLCgamma2.	2	11	0.0012	ENSGALP00000035870,ENSGALP00000041692	IL7,VAV1
PMID:16494716	(2006) Antiviral response in pandemic influenza viruses.	2	11	0.0012	ENSGALP00000035830,ENSGALP00000043092	TLR3,TLR7
PMID:17664287	(2007) Signaling through Fc gamma RIII is required for optimal T helper type (Th)2 responses and Th2-mediated airway inflammation.	2	11	0.0012	ENSGALP00000011319,ENSGALP00000038134	TLR2-2,TLR4
PMID:18081698	(2008) Expression of the NF-kappaB inhibitor ABIN-3 in response to TNF and toll-like receptor 4 stimulation is itself regulated by NF-kappaB.	2	11	0.0012	ENSGALP00000012873,ENSGALP00000042597	MYD88,TRAF6
PMID:18799018	(2008) Prolonged exposure to bacterial toxins downregulated expression of toll-like receptors in mesenchymal stromal cell-derived osteoprogenitors.	2	11	0.0012	ENSGALP00000011319,ENSGALP00000038134	TLR2-2,TLR4
PMID:19998056	(2010) Pseudovirions as vehicles for the delivery of siRNA.	2	11	0.0012	ENSGALP00000035830,ENSGALP00000043092	TLR3,TLR7
PMID:20886049	(2010) BAMBI is expressed in endothelial cells and is regulated by lysosomalautolysosomal degradation.	2	11	0.0012	ENSGALP00000011319,ENSGALP00000038134	TLR2-2,TLR4
PMID:21034731	(2011) The cell adhesion-associated protein Git2 regulates morphogenetic movements during zebrafish embryonic development.	2	11	0.0012	ENSGALP00000024180,ENSGALP00000038832	FYN,GIT1
PMID:21079741	(2010) The cell cycle time of CD8+ T cells responding in vivo is controlled by the type of antigenic stimulus.	2	11	0.0012	ENSGALP00000035830,ENSGALP00000043092	TLR3,TLR7
PMID:21729006	(2012) The invasion of tobacco mosaic virus RNA induces endoplasmic reticulum stress-related autophagy in HeLa cells.	2	11	0.0012	ENSGALP00000035830,ENSGALP00000042597	MYD88,TLR7
PMID:22431747	(2012) The evolution of metazoan extracellular matrix.	2	11	0.0012	ENSGALP00000000518,ENSGALP00000012130	ITGB2,ITGB3
PMID:23031643	(2012) Expression of myeloid differentiation factor 88 in neurons is not requisite for the induction of sickness behavior by interleukin-1Beta.	2	11	0.0012	ENSGALP00000011319,ENSGALP00000042597	MYD88,TLR4
PMID:23409245	(2013) Hypothalamic neuronal toll-like receptor 2 protects against age-induced obesity.	2	11	0.0012	ENSGALP00000011319,ENSGALP00000043092	TLR3,TLR4
PMID:23460923	(2013) PRAME is a golgi-targeted protein that associates with the Elongin BC complex and is upregulated by interferon-gamma and bacterial PAMPs.	2	11	0.0012	ENSGALP00000011319,ENSGALP00000038134	TLR2-2,TLR4
PMID:23649937	(2013) Cationic host defence peptides: potential as antiviral therapeutics.	2	11	0.0012	ENSGALP00000035830,ENSGALP00000043092	TLR3,TLR7
PMID:23886034	(2013) Influenza AHong Kong1561997(H5N1) virus NS1 gene mutations F103L and M106I both increase IFN antagonism, virulence and cytoplasmic localization but differ in binding to RIG-I and CPSF30.	2	11	0.0012	ENSGALP00000035830,ENSGALP00000043092	TLR3,TLR7
PMID:23940584	(2013) Sparstolonin B inhibits pro-angiogenic functions and blocks cell cycle progression in endothelial cells.	2	11	0.0012	ENSGALP00000011319,ENSGALP00000038134	TLR2-2,TLR4
PMID:23960112	(2013) Performance, histomorphology, and toll-like receptor, chemokine, and cytokine profile locally and systemically in broiler chickens fed diets supplemented with yeast-derived macromolecules.	2	11	0.0012	ENSGALP00000011319,ENSGALP00000038134	TLR2-2,TLR4
PMID:24594555	(2014) Antimicrobial peptides from fish.	2	11	0.0012	ENSGALP00000042597,ENSGALP00000043092	MYD88,TLR3
PMID:24706939	(2014) Viral suppression of innate immunity via spatial isolation of TBK1IKKEpsilon from mitochondrial antiviral platform.	2	11	0.0012	ENSGALP00000012873,ENSGALP00000043092	TLR3,TRAF6
PMID:24796306	(2014) Gram-negative marine bacteria: structural features of lipopolysaccharides and their relevance for economically important diseases.	2	11	0.0012	ENSGALP00000011319,ENSGALP00000042597	MYD88,TLR4
PMID:25988382	(2015) Molecular Cloning and Functional Characterization of Mannose Receptor in Zebra Fish (Danio rerio) during Infection with Aeromonas sobria.	2	11	0.0012	ENSGALP00000011319,ENSGALP00000038134	TLR2-2,TLR4
PMID:26022530	(2016) N-3 polyunsaturated fatty acids modulate B cell activity in pre-clinical models: Implications for the immune response to infections.	2	11	0.0012	ENSGALP00000011319,ENSGALP00000035870	IL7,TLR4
PMID:26145985	(2015) 100 Years later: Celebrating the contributions of x-ray crystallography to allergy and clinical immunology.	2	11	0.0012	ENSGALP00000011319,ENSGALP00000038134	TLR2-2,TLR4
PMID:26276027	(2015) Emerging Infections of CNS: Avian Influenza A Virus, Rift Valley Fever Virus and Human Parechovirus.	2	11	0.0012	ENSGALP00000035830,ENSGALP00000043092	TLR3,TLR7
PMID:26910195	(2016) New developments in an old strategy: heterologous vector primes and envelope protein boosts in HIV vaccine design.	2	11	0.0012	ENSGALP00000011319,ENSGALP00000038134	TLR2-2,TLR4
PMID:27356970	(2016) Expansion of amphibian intronless interferons revises the paradigm for interferon evolution and functional diversity.	2	11	0.0012	ENSGALP00000011319,ENSGALP00000038134	TLR2-2,TLR4
PMID:27384714	(2016) Current status and perspectives of Clonorchis sinensis and clonorchiasis: epidemiology, pathogenesis, omics, prevention and control.	2	11	0.0012	ENSGALP00000011319,ENSGALP00000038134	TLR2-2,TLR4
PMID:27830700	(2016) Sensing of HSV-1 by the cGAS-STING pathway in microglia orchestrates antiviral defence in the CNS.	2	11	0.0012	ENSGALP00000038134,ENSGALP00000043092	TLR2-2,TLR3
PMID:28199419	(2017) Early immune responses and development of pathogenesis of avian infectious bronchitis viruses with different virulence profiles.	2	11	0.0012	ENSGALP00000035830,ENSGALP00000043092	TLR3,TLR7
PMID:28473814	(2017) Avian Interferon-Inducible Transmembrane Protein Family Effectively Restricts Avian Tembusu Virus Infection.	2	11	0.0012	ENSGALP00000042597,ENSGALP00000043092	MYD88,TLR3
PMID:28595983	(2017) The effects of structure on pre-mRNA processing and stability.	2	11	0.0012	ENSGALP00000012873,ENSGALP00000043092	TLR3,TRAF6
PMID:28676707	(2017) The gut microbiome and liver cancer: mechanisms and clinical translation.	2	11	0.0012	ENSGALP00000011319,ENSGALP00000038134	TLR2-2,TLR4
PMID:28794132	(2017) An essential role of high-molecular-weight kininogen in endotoxemia.	2	11	0.0012	ENSGALP00000011319,ENSGALP00000023991	ITGA2,TLR4
PMID:29229906	(2017) Direction of actin flow dictates integrin LFA-1 orientation during leukocyte migration.	2	11	0.0012	ENSGALP00000000518,ENSGALP00000012130	ITGB2,ITGB3
PMID:30199754	(2018) Virus-like particles presenting flagellin exhibit unique adjuvant effects on eliciting T helper type 1 humoral and cellular immune responses to poor immunogenic influenza virus M2e protein vaccine.	2	11	0.0012	ENSGALP00000011319,ENSGALP00000015286	TLR4,TLR5
PMID:30257608	(2018) Innate humoral immune defences in mammals and insects: The same, with differences ?	2	11	0.0012	ENSGALP00000011319,ENSGALP00000042597	MYD88,TLR4
PMID:32133048	(2020) Checkpoint blockade inhibitors enhances the effectiveness of a Listeria monocytogenes-based melanoma vaccine.	2	11	0.0012	ENSGALP00000015286,ENSGALP00000038134	TLR2-2,TLR5
PMID:11514602	(2001) Interference with immunoglobulin (Ig)alpha immunoreceptor tyrosine-based activation motif (ITAM) phosphorylation modulates or blocks B cell development, depending on the availability of an Igbeta cytoplasmic tail.	2	12	0.0013	ENSGALP00000024180,ENSGALP00000041692	FYN,VAV1
PMID:12147678	(2002) Mycobacterium and the coat of many lipids.	2	12	0.0013	ENSGALP00000011319,ENSGALP00000038134	TLR2-2,TLR4
PMID:19176533	(2009) Structural determinants of integrin binding to the talin rod.	2	12	0.0013	ENSGALP00000000518,ENSGALP00000012130	ITGB2,ITGB3
PMID:19693543	(2010) Integrins.	2	12	0.0013	ENSGALP00000000518,ENSGALP00000012130	ITGB2,ITGB3
PMID:21829538	(2011) Secreted human amyloid precursor protein binds semaphorin 3a and prevents semaphorin-induced growth cone collapse.	2	12	0.0013	ENSGALP00000000518,ENSGALP00000012130	ITGB2,ITGB3
PMID:22020178	(2012) The retinoid X receptors and their ligands.	3	69	0.0013	ENSGALP00000004924,ENSGALP00000011319,ENSGALP00000038134	NCOR2,TLR2-2,TLR4
PMID:22110957	(2010) Interferon Alpha Characterization and Its Comparative Expression in PBM Cells of Capra hircus and Antelope cervicapra Cultured in the Presence of TLR9 Agonist.	2	12	0.0013	ENSGALP00000038134,ENSGALP00000043092	TLR2-2,TLR3
PMID:22574220	(2012) TLR tolerance reduces IFN-alpha production despite plasmacytoid dendritic cell expansion and anti-nuclear antibodies in NZB bicongenic mice.	2	12	0.0013	ENSGALP00000035830,ENSGALP00000043092	TLR3,TLR7
PMID:22589715	(2012) The lipopolysaccharide core of Brucella abortus acts as a shield against innate immunity recognition.	2	12	0.0013	ENSGALP00000011319,ENSGALP00000038134	TLR2-2,TLR4
PMID:22662237	(2012) Down-regulation of GEP100 causes increase in E-cadherin levels and inhibits pancreatic cancer cell invasion.	2	12	0.0013	ENSGALP00000000518,ENSGALP00000012130	ITGB2,ITGB3
PMID:23242739	(2013) Integrin alpha2beta 1 (Alfa2Beta1) promotes prostate cancer skeletal metastasis.	2	12	0.0013	ENSGALP00000000518,ENSGALP00000012130	ITGB2,ITGB3
PMID:23818254	(2013) Disease-causing mutations in the XIAP BIR2 domain impair NOD2-dependent immune signalling.	2	12	0.0013	ENSGALP00000011319,ENSGALP00000038134	TLR2-2,TLR4
PMID:23922676	(2013) Deoxynivalenol impairs hepatic and intestinal gene expression of selected oxidative stress, tight junction and inflammation proteins in broiler chickens, but addition of an adsorbing agent shifts the effects to the distal parts of the small ...	2	12	0.0013	ENSGALP00000011319,ENSGALP00000038134	TLR2-2,TLR4
PMID:24154958	(2014) Enrichment of human prostate cancer cells with tumor initiating properties in mouse and zebrafish xenografts by differential adhesion.	2	12	0.0013	ENSGALP00000000518,ENSGALP00000012130	ITGB2,ITGB3
PMID:24171157	(2013) Illuminating the petite picture of T cell memory responses to Listeria monocytogenes.	2	12	0.0013	ENSGALP00000012873,ENSGALP00000035870	IL7,TRAF6
PMID:24345215	(2013) LPS-induced inflammation in the chicken is associated with CCAATenhancer binding protein beta-mediated fat mass and obesity associated gene down-regulation in the liver but not hypothalamus.	2	12	0.0013	ENSGALP00000011319,ENSGALP00000038134	TLR2-2,TLR4
PMID:24924309	(2014) Cell division and targeted cell cycle arrest opens and stabilizes basement membrane gaps.	2	12	0.0013	ENSGALP00000000518,ENSGALP00000012130	ITGB2,ITGB3
PMID:25186179	(2014) The HMGB1-RAGE axis mediates traumatic brain injury-induced pulmonary dysfunction in lung transplantation.	2	12	0.0013	ENSGALP00000011319,ENSGALP00000042597	MYD88,TLR4
PMID:25586882	(2015) Neuromelanin activates proinflammatory microglia through a caspase-8-dependent mechanism.	2	12	0.0013	ENSGALP00000011319,ENSGALP00000015286	TLR4,TLR5
PMID:25912715	(2015) Baculovirus-mediated gene delivery and RNAi applications.	2	12	0.0013	ENSGALP00000042597,ENSGALP00000043092	MYD88,TLR3
PMID:26070137	(2015) Primary Bovine Extra-Embryonic Cultured Cells: A New Resource for the Study of In Vivo Peri-Implanting Phenotypes and Mesoderm Formation.	3	67	0.0013	ENSGALP00000004173,ENSGALP00000012130,ENSGALP00000038832	GIT1,ITGAV,ITGB2
PMID:26170617	(2015) Animal models of polymicrobial pneumonia.	2	12	0.0013	ENSGALP00000035830,ENSGALP00000038134	TLR2-2,TLR7
PMID:26236111	(2015) ATP-Binding Pocket-Targeted Suppression of Src and Syk by Luteolin Contributes to Its Anti-Inflammatory Action.	2	12	0.0013	ENSGALP00000011319,ENSGALP00000042597	MYD88,TLR4
PMID:26272855	(2015) IL-33 released by alum is responsible for early cytokine production and has adjuvant properties.	2	12	0.0013	ENSGALP00000035870,ENSGALP00000042597	IL7,MYD88
PMID:26635752	(2015) Host Innate Immune Responses of Ducks Infected with Newcastle Disease Viruses of Different Pathogenicities.	2	12	0.0013	ENSGALP00000035830,ENSGALP00000043092	TLR3,TLR7
PMID:27058035	(2016) cGAS Senses Human Cytomegalovirus and Induces Type I Interferon Responses in Human Monocyte-Derived Cells.	2	12	0.0013	ENSGALP00000035830,ENSGALP00000042597	MYD88,TLR7
PMID:27232337	(2016) Alpha 1 Antitrypsin Inhibits Dendritic Cell Activation and Attenuates Nephritis in a Mouse Model of Lupus.	2	12	0.0013	ENSGALP00000011319,ENSGALP00000035830	TLR4,TLR7
PMID:27287182	(2016) Natural STING Agonist as an 'Ideal' Adjuvant for Cutaneous Vaccination.	2	12	0.0013	ENSGALP00000011319,ENSGALP00000035830	TLR4,TLR7
PMID:27592607	(2016) Plasmacytoid dendritic cells induce tolerance predominantly by cargoing antigen to lymph nodes.	2	12	0.0013	ENSGALP00000011319,ENSGALP00000035830	TLR4,TLR7
PMID:27718206	(2017) Eliciting Epitope-Specific CD8+ T Cell Response by Immunization with Microbial Protein Antigens Formulated with Alfa-Galactosylceramide: Theory, Practice, and Protocols.	2	12	0.0013	ENSGALP00000011319,ENSGALP00000043092	TLR3,TLR4
PMID:27866935	(2016) Diarrheagenic Escherichia coli.	2	12	0.0013	ENSGALP00000011319,ENSGALP00000015286	TLR4,TLR5
PMID:27965307	(2017) Dual-specific Chimeric Antigen Receptor T Cells and an Indirect Vaccine Eradicate a Variety of Large Solid Tumors in an Immunocompetent, Self-antigen Setting.	2	12	0.0013	ENSGALP00000035870,ENSGALP00000041692	IL7,VAV1
PMID:28075416	(2017) Phosphorylated Radix Cyathulae officinalis Polysaccharides Act as Adjuvant via Promoting Dendritic Cell Maturation.	2	12	0.0013	ENSGALP00000011319,ENSGALP00000038134	TLR2-2,TLR4
PMID:28550391	(2018) Gut-liver axis, cirrhosis and portal hypertension: the chicken and the egg.	2	12	0.0013	ENSGALP00000011319,ENSGALP00000042597	MYD88,TLR4
PMID:29118744	(2017) Two Lactobacillus Species Inhibit the Growth and Alfa-Toxin Production of Clostridium perfringens and Induced Proinflammatory Factors in Chicken Intestinal Epithelial Cells in Vitro.	2	12	0.0013	ENSGALP00000011319,ENSGALP00000038134	TLR2-2,TLR4
PMID:29178824	(2017) Transcriptome analysis of avian reovirus-mediated changes in gene expression of normal chicken fibroblast DF-1 cells.	2	12	0.0013	ENSGALP00000042597,ENSGALP00000043092	MYD88,TLR3
PMID:29354135	(2017) MicroRNA-155-at the Critical Interface of Innate and Adaptive Immunity in Arthritis.	3	67	0.0013	ENSGALP00000012873,ENSGALP00000035830,ENSGALP00000042597	MYD88,TLR7,TRAF6
PMID:29879819	(2018) Molecular characterization and expression of a disintegrin and metalloproteinase with thrombospondin motifs 8 in chicken.	2	12	0.0013	ENSGALP00000011319,ENSGALP00000043092	TLR3,TLR4
PMID:30069488	(2018) PYR-41 and Thalidomide Impair Dendritic Cell Cross-Presentation by Inhibiting Myddosome Formation and Attenuating the Endosomal Recruitments of p97 and Sec61 via NF-KB Inactivation.	2	12	0.0013	ENSGALP00000011319,ENSGALP00000042597	MYD88,TLR4
PMID:30127064	(2018) The Evolving Erythrocyte: Red Blood Cells as Modulators of Innate Immunity.	2	12	0.0013	ENSGALP00000011319,ENSGALP00000043092	TLR3,TLR4
PMID:30243619	(2019) Cell and Animal Models for Studying Hepatitis B Virus Infection and Drug Development.	2	12	0.0013	ENSGALP00000011319,ENSGALP00000035830	TLR4,TLR7
PMID:30283434	(2018) New Vaccine Technologies to Combat Outbreak Situations.	2	12	0.0013	ENSGALP00000035830,ENSGALP00000043092	TLR3,TLR7
PMID:30327535	(2019) Novel role of gastrin releasing peptide-mediated signaling in the host response to influenza infection.	2	12	0.0013	ENSGALP00000011319,ENSGALP00000042597	MYD88,TLR4
PMID:30496273	(2018) Proteomics analysis of chicken peripheral blood lymphocyte in Taishan Pinus massoniana pollen polysaccharide regulation.	2	12	0.0013	ENSGALP00000011319,ENSGALP00000037001	RAC2,TLR4
PMID:30519246	(2018) Age-Related Changes on CD40 Promotor Methylation and Immune Gene Expressions in Thymus of Chicken.	2	12	0.0013	ENSGALP00000011319,ENSGALP00000015286	TLR4,TLR5
PMID:30564756	(2018) Diet supplementation with an organic acids-based formulation affects gut microbiota and expression of gut barrier genes in broilers.	2	12	0.0013	ENSGALP00000011319,ENSGALP00000038134	TLR2-2,TLR4
PMID:30745142	(2019) Dying Neurons Utilize Innate Immune Signaling to Prime Glia for Phagocytosis during Development.	2	12	0.0013	ENSGALP00000038134,ENSGALP00000042597	MYD88,TLR2-2
PMID:30794604	(2019) Enhanced IL-1Beta production is mediated by a TLR2-MYD88-NLRP3 signaling axis during coinfection with influenza A virus and Streptococcus pneumoniae.	2	12	0.0013	ENSGALP00000038134,ENSGALP00000042597	MYD88,TLR2-2
PMID:30926242	(2019) Distinct USP25 and USP28 Oligomerization States Regulate Deubiquitinating Activity.	2	12	0.0013	ENSGALP00000011319,ENSGALP00000012873	TLR4,TRAF6
PMID:30971685	(2019) Neutrophil extracellular traps in the central nervous system hinder bacterial clearance during pneumococcal meningitis.	2	12	0.0013	ENSGALP00000011319,ENSGALP00000038134	TLR2-2,TLR4
PMID:31010204	(2019) Extraction, Purification, Structural Characteristics, Biological Activities and Pharmacological Applications of Acemannan, a Polysaccharide from Aloe vera: A Review.	2	12	0.0013	ENSGALP00000011319,ENSGALP00000015286	TLR4,TLR5
PMID:31178974	(2019) Protective Effect of Ginsenoside Rg1 on Oxidative Damage Induced by Hydrogen Peroxide in Chicken Splenic Lymphocytes.	2	12	0.0013	ENSGALP00000011319,ENSGALP00000043092	TLR3,TLR4
PMID:31433004	(2019) Trypanosoma cruzi down-regulates mechanosensitive proteins in cardiomyocytes.	2	12	0.0013	ENSGALP00000000518,ENSGALP00000012130	ITGB2,ITGB3
PMID:31558913	(2019) Traditional Chinese Medicine and regulatory roles on epithelial-mesenchymal transitions.	3	67	0.0013	ENSGALP00000011319,ENSGALP00000024180,ENSGALP00000042597	FYN,MYD88,TLR4
PMID:31570577	(2019) Amyloid-beta impairs TOM1-mediated IL-1R1 signaling.	2	12	0.0013	ENSGALP00000011319,ENSGALP00000027049	IL1R1,TLR4
PMID:31746149	(2020) Repurposing the yellow fever vaccine for intratumoral immunotherapy.	2	12	0.0013	ENSGALP00000035830,ENSGALP00000043092	TLR3,TLR7
PMID:32178295	(2020) Splenic Gene Expression Signatures in Slow-Growing Chickens Stimulated in Ovo with Galactooligosaccharides and Challenged with Heat.	2	12	0.0013	ENSGALP00000038134,ENSGALP00000042597	MYD88,TLR2-2
PMID:24978432	(2014) Fibrogenesis and Carcinogenesis in Nonalcoholic Steatohepatitis (NASH): Involvement of Matrix Metalloproteinases (MMPs) and Tissue Inhibitors of Metalloproteinase (TIMPs).	3	71	0.0014	ENSGALP00000011319,ENSGALP00000038134,ENSGALP00000042597	MYD88,TLR2-2,TLR4
PMID:15269787	(2004) An integrin-dependent role of pouch endoderm in hyoid cartilage development.	2	13	0.0015	ENSGALP00000000518,ENSGALP00000012130	ITGB2,ITGB3
PMID:15967817	(2005) No audible wheezing: nuggets and conundrums from mouse asthma models.	2	13	0.0015	ENSGALP00000011319,ENSGALP00000042597	MYD88,TLR4
PMID:18282082	(2008) How force might activate talin's vinculin binding sites: SMD reveals a structural mechanism.	2	13	0.0015	ENSGALP00000000518,ENSGALP00000012130	ITGB2,ITGB3
PMID:19300567	(2007) Mechanisms of over-activated innate immune system regulation in autoimmune and neurodegenerative disorders.	2	13	0.0015	ENSGALP00000011319,ENSGALP00000038134	TLR2-2,TLR4
PMID:19361843	(2009) IL-33-activated dendritic cells induce an atypical TH2-type response.	2	13	0.0015	ENSGALP00000011319,ENSGALP00000042597	MYD88,TLR4
PMID:19414802	(2009) IL-1R type I-dependent hemopoietic stem cell proliferation is necessary for inflammatory granulopoiesis and reactive neutrophilia.	2	13	0.0015	ENSGALP00000035870,ENSGALP00000042597	IL7,MYD88
PMID:20173030	(2010) Thymic stromal lymphopoietin-activated plasmacytoid dendritic cells induce the generation of FOXP3+ regulatory T cells in human thymus.	2	13	0.0015	ENSGALP00000035830,ENSGALP00000035870	IL7,TLR7
PMID:21278349	(2011) Type III IFNs in pteropid bats: differential expression patterns provide evidence for distinct roles in antiviral immunity.	2	13	0.0015	ENSGALP00000035830,ENSGALP00000043092	TLR3,TLR7
PMID:22396645	(2012) Critical role of perforin-dependent CD8+ T cell immunity for rapid protective vaccination in a murine model for human smallpox.	2	13	0.0015	ENSGALP00000023991,ENSGALP00000042597	ITGA2,MYD88
PMID:22525440	(2012) Dynamic action of carotenoids in cardioprotection and maintenance of cardiac health.	2	13	0.0015	ENSGALP00000011319,ENSGALP00000042597	MYD88,TLR4
PMID:23335924	(2012) The expanding world of extracellular traps: not only neutrophils but much more.	2	13	0.0015	ENSGALP00000011319,ENSGALP00000035830	TLR4,TLR7
PMID:23383065	(2013) TLR-9 contributes to the antiviral innate immune sensing of rodent parvoviruses MVMp and H-1PV by normal human immune cells.	2	13	0.0015	ENSGALP00000035830,ENSGALP00000043092	TLR3,TLR7
PMID:23710447	(2013) Expression pattern of genes of RLR-mediated antiviral pathway in different-breed chicken response to Marek's disease virus infection.	2	13	0.0015	ENSGALP00000035830,ENSGALP00000043092	TLR3,TLR7
PMID:23748415	(2013) MyeloidMicroglial driven autologous hematopoietic stem cell gene therapy corrects a neuronopathic lysosomal disease.	2	13	0.0015	ENSGALP00000011319,ENSGALP00000042597	MYD88,TLR4
PMID:24137544	(2013) Nanoscale protein architecture of the kidney glomerular basement membrane.	2	13	0.0015	ENSGALP00000000518,ENSGALP00000012130	ITGB2,ITGB3
PMID:24238342	(2013) Lung airway-surveilling CXCR3(hi) memory CD8(+) T cells are critical for protection against influenza A virus.	2	13	0.0015	ENSGALP00000042597,ENSGALP00000043092	MYD88,TLR3
PMID:24437488	(2014) Epithelial and stromal cells of bovine endometrium have roles in innate immunity and initiate inflammatory responses to bacterial lipopeptides in vitro via Toll-like receptors TLR2, TLR1, and TLR6.	2	13	0.0015	ENSGALP00000011319,ENSGALP00000038134	TLR2-2,TLR4
PMID:24626168	(2014) Regulatory T-cell vaccination independent of auto-antigen.	2	13	0.0015	ENSGALP00000011319,ENSGALP00000015286	TLR4,TLR5
PMID:24975833	(2014) Regulatory tone and mucosal immunity in asthma.	2	13	0.0015	ENSGALP00000011319,ENSGALP00000043092	TLR3,TLR4
PMID:25388285	(2015) Paradoxical decrease in the capture and lymph node delivery of cancer vaccine antigen induced by a TLR4 agonist as visualized by dual-mode imaging.	2	13	0.0015	ENSGALP00000011319,ENSGALP00000042597	MYD88,TLR4
PMID:25587856	(2015) H5N1 Virus Hemagglutinin Inhibition of cAMP-Dependent CFTR via TLR4-Mediated Janus Tyrosine Kinase 3 Activation Exacerbates Lung Inflammation.	2	13	0.0015	ENSGALP00000011319,ENSGALP00000038134	TLR2-2,TLR4
PMID:25614588	(2015) Bat and pig IFN-induced transmembrane protein 3 restrict cell entry by influenza virus and lyssaviruses.	2	13	0.0015	ENSGALP00000024180,ENSGALP00000043092	FYN,TLR3
PMID:26056568	(2013) Properties and prospects of adjuvants in influenza vaccination - messy precipitates or blessed opportunities?	2	13	0.0015	ENSGALP00000011319,ENSGALP00000015286	TLR4,TLR5
PMID:26590313	(2016) Cutting Edge: DNA in the Lung Microenvironment during Influenza Virus Infection Tempers Inflammation by Engaging the DNA Sensor AIM2.	2	13	0.0015	ENSGALP00000035830,ENSGALP00000043092	TLR3,TLR7
PMID:26676169	(2015) Heat Shock Proteins: A Review of the Molecular Chaperones for Plant Immunity.	2	13	0.0015	ENSGALP00000011319,ENSGALP00000038134	TLR2-2,TLR4
PMID:27150912	(2016) Antigen distribution of TMUV and GPV are coincident with the expression profiles of CD8Alfa-positive cells and goose IFNGamma.	2	13	0.0015	ENSGALP00000035830,ENSGALP00000043092	TLR3,TLR7
PMID:27161398	(2016) Talin tension sensor reveals novel features of focal adhesion force transmission and mechanosensitivity.	2	13	0.0015	ENSGALP00000000518,ENSGALP00000012130	ITGB2,ITGB3
PMID:27486774	(2016) Ubc13: the Lys63 ubiquitin chain building machine.	3	72	0.0015	ENSGALP00000011319,ENSGALP00000012873,ENSGALP00000042597	MYD88,TLR4,TRAF6
PMID:27799056	(2016) Toxicity of graphene-family nanoparticles: a general review of the origins and mechanisms.	2	13	0.0015	ENSGALP00000011319,ENSGALP00000042597	MYD88,TLR4
PMID:27934903	(2016) Unlocking bat immunology: establishment of Pteropus alecto bone marrow-derived dendritic cells and macrophages.	2	13	0.0015	ENSGALP00000035830,ENSGALP00000043092	TLR3,TLR7
PMID:28008328	(2016) Dietary Administration of Bacillus subtilis Enhances Growth Performance, Immune Response and Disease Resistance in Cherry Valley Ducks.	2	13	0.0015	ENSGALP00000035830,ENSGALP00000043092	TLR3,TLR7
PMID:28740415	(2017) The extracellular matrix of eggshell displays anti-inflammatory activities through NF-KB in LPS-triggered human immune cells.	2	13	0.0015	ENSGALP00000011319,ENSGALP00000042597	MYD88,TLR4
PMID:28794452	(2017) The anti-influenza M2e antibody response is promoted by XCR1 targeting in pig skin.	2	13	0.0015	ENSGALP00000011319,ENSGALP00000035830	TLR4,TLR7
PMID:29397456	(2018) Immune responses of mature chicken bone-marrow-derived dendritic cells infected with Newcastle disease virus strains with differing pathogenicity.	2	13	0.0015	ENSGALP00000035830,ENSGALP00000043092	TLR3,TLR7
PMID:29535680	(2018) Two Distinct Interferon-Gamma in the Orange-Spotted Grouper (Epinephelus coioides): Molecular Cloning, Functional Characterization, and Regulation in Toll-Like Receptor Pathway by Induction of miR-146a.	2	13	0.0015	ENSGALP00000012873,ENSGALP00000042597	MYD88,TRAF6
PMID:30087857	(2018) The Clinical Importance of Campylobacter concisus and Other Human Hosted Campylobacter Species.	2	13	0.0015	ENSGALP00000015286,ENSGALP00000043092	TLR3,TLR5
PMID:30142214	(2018) Interferon-stimulated TRIM69 interrupts dengue virus replication by ubiquitinating viral nonstructural protein 3.	2	13	0.0015	ENSGALP00000012873,ENSGALP00000043092	TLR3,TRAF6
PMID:30402504	(2018) OK-432 Acts as Adjuvant to Modulate T Helper 2 Inflammatory Responses in a Murine Model of Asthma.	2	13	0.0015	ENSGALP00000038134,ENSGALP00000043092	TLR2-2,TLR3
PMID:30683848	(2019) The effect of different sources of fish and camelina sativa oil on immune cell and adipose tissue mRNA expression in subjects with abnormal fasting glucose metabolism: a randomized controlled trial.	2	13	0.0015	ENSGALP00000011319,ENSGALP00000038134	TLR2-2,TLR4
PMID:30761155	(2018) Beta-Defensins: Farming the Microbiome for Homeostasis and Health.	2	13	0.0015	ENSGALP00000011319,ENSGALP00000038134	TLR2-2,TLR4
PMID:31427364	(2019) Antigen Complexed with a TLR9 Agonist Bolsters c-Myc and mTORC1 Activity in Germinal Center B Lymphocytes.	2	13	0.0015	ENSGALP00000011319,ENSGALP00000035830	TLR4,TLR7
PMID:32098265	(2020) Effect of Carotenoids, Oligosaccharides and Anthocyanins on Growth Performance, Immunological Parameters and Intestinal Morphology in Broiler Chickens Challenged with Escherichia coli Lipopolysaccharide.	2	13	0.0015	ENSGALP00000011319,ENSGALP00000015286	TLR4,TLR5
PMID:32148400	(2020) Ginseng alleviates microbial infections of the respiratory tract: a review.	2	13	0.0015	ENSGALP00000011319,ENSGALP00000038134	TLR2-2,TLR4
PMID:15731336	(2005) Evolutionarily conserved human targets of adenosine to inosine RNA editing.	2	14	0.0016	ENSGALP00000000518,ENSGALP00000012130	ITGB2,ITGB3
PMID:17543136	(2007) The integrins.	2	14	0.0016	ENSGALP00000000518,ENSGALP00000012130	ITGB2,ITGB3
PMID:18389062	(2008) The MHV68 M2 protein drives IL-10 dependent B cell proliferation and differentiation.	2	14	0.0016	ENSGALP00000024180,ENSGALP00000041692	FYN,VAV1
PMID:18802088	(2008) Distinct regulation of integrin-dependent T cell conjugate formation and NF-kappa B activation by the adapter protein ADAP.	2	14	0.0016	ENSGALP00000024180,ENSGALP00000035870	FYN,IL7
PMID:19150474	(2009) A TLR3 ligand that exhibits potent inhibition of influenza virus replication and has strong adjuvant activity has the potential for dual applications in an influenza pandemic.	2	14	0.0016	ENSGALP00000011319,ENSGALP00000043092	TLR3,TLR4
PMID:19430490	(2009) Coronaviruses post-SARS: update on replication and pathogenesis.	2	14	0.0016	ENSGALP00000035830,ENSGALP00000043092	TLR3,TLR7
PMID:19956661	(2009) Gammaherpesvirus-driven plasma cell differentiation regulates virus reactivation from latently infected B lymphocytes.	2	14	0.0016	ENSGALP00000024180,ENSGALP00000041692	FYN,VAV1
PMID:20163538	(2010) Modulation of microvascular smooth muscle adhesion and mechanotransduction by integrin-linked kinase.	2	14	0.0016	ENSGALP00000000518,ENSGALP00000012130	ITGB2,ITGB3
PMID:21227671	(2011) The invention of lymphocytes.	2	14	0.0016	ENSGALP00000035830,ENSGALP00000038134	TLR2-2,TLR7
PMID:22155173	(2012) Glucocorticoid-induced tumor necrosis factor receptor family-related protein regulates CD4(+)T cell-mediated colitis in mice.	2	14	0.0016	ENSGALP00000011319,ENSGALP00000038134	TLR2-2,TLR4
PMID:22291181	(2012) Skin langerin+ dendritic cells transport intradermally injected anti-DEC-205 antibodies but are not essential for subsequent cytotoxic CD8+ T cell responses.	2	14	0.0016	ENSGALP00000035830,ENSGALP00000043092	TLR3,TLR7
PMID:22919405	(2012) The involvement of microglial cells in Japanese encephalitis infections.	2	14	0.0016	ENSGALP00000035830,ENSGALP00000043092	TLR3,TLR7
PMID:23129747	(2012) Transcriptional regulator early growth response gene 2 (Egr2) is required for T cell anergy in vitro and in vivo.	2	14	0.0016	ENSGALP00000024180,ENSGALP00000035870	FYN,IL7
PMID:23235830	(2013) Apoptotic cell clearance by bronchial epithelial cells critically influences airway inflammation.	2	14	0.0016	ENSGALP00000023991,ENSGALP00000037001	ITGA2,RAC2
PMID:23355837	(2013) NET balancing: a problem in inflammatory lung diseases.	2	14	0.0016	ENSGALP00000011319,ENSGALP00000035830	TLR4,TLR7
PMID:24859344	(2014) Immunogenetic factors affecting susceptibility of humans and rodents to hantaviruses and the clinical course of hantaviral disease in humans.	2	14	0.0016	ENSGALP00000011319,ENSGALP00000035830	TLR4,TLR7
PMID:25200954	(2014) IL-18 synergizes with IL-7 to drive slow proliferation of naive CD8 T cells by costimulating self-peptide-mediated TCR signals.	2	14	0.0016	ENSGALP00000012873,ENSGALP00000035870	IL7,TRAF6
PMID:25758009	(2015) Adaptive Evolution as a Predictor of Species-Specific Innate Immune Response.	2	14	0.0016	ENSGALP00000011319,ENSGALP00000012873	TLR4,TRAF6
PMID:25807551	(2015) Tumor angiogenesis in the absence of fibronectin or its cognate integrin receptors.	2	14	0.0016	ENSGALP00000000518,ENSGALP00000004173	ITGAV,ITGB3
PMID:25816015	(2015) The impact of immunosenescence on humoral immune response variation after influenza AH1N1 vaccination in older subjects.	2	14	0.0016	ENSGALP00000035830,ENSGALP00000035870	IL7,TLR7
PMID:27005670	(2016) Biochemical and Functional Insights into the Integrated Regulation of Innate Immune Cell Responses by Teleost Leukocyte Immune-Type Receptors.	2	14	0.0016	ENSGALP00000024180,ENSGALP00000041692	FYN,VAV1
PMID:27185856	(2016) Bridging channel dendritic cells induce immunity to transfused red blood cells.	2	14	0.0016	ENSGALP00000011319,ENSGALP00000038134	TLR2-2,TLR4
PMID:27297184	(2016) Host parasite communications-Messages from helminths for the immune system: Parasite communication and cell-cell interactions.	2	14	0.0016	ENSGALP00000011319,ENSGALP00000043092	TLR3,TLR4
PMID:27525067	(2016) Understanding natural herpes simplex virus immunity to inform next-generation vaccine design.	2	14	0.0016	ENSGALP00000011319,ENSGALP00000043092	TLR3,TLR4
PMID:27657109	(2016) The Host Cell Receptors for Measles Virus and Their Interaction with the Viral Hemagglutinin (H) Protein.	2	14	0.0016	ENSGALP00000011319,ENSGALP00000024180	FYN,TLR4
PMID:27798156	(2016) Tissue Microenvironments in the Nasal Epithelium of Rainbow Trout (Oncorhynchus mykiss) Define Two Distinct CD8Alfa+ Cell Populations and Establish Regional Immunity.	2	14	0.0016	ENSGALP00000000518,ENSGALP00000012130	ITGB2,ITGB3
PMID:27886105	(2016) Pro-Tumoral Inflammatory Myeloid Cells as Emerging Therapeutic Targets.	3	75	0.0016	ENSGALP00000011319,ENSGALP00000035830,ENSGALP00000043092	TLR3,TLR4,TLR7
PMID:28299185	(2017) Recent advances in understanding the cellular roles of GSK-3.	2	14	0.0016	ENSGALP00000012873,ENSGALP00000043092	TLR3,TRAF6
PMID:28900138	(2017) Adaptation of influenza A (H7N9) virus in primary human airway epithelial cells.	2	14	0.0016	ENSGALP00000035870,ENSGALP00000043092	IL7,TLR3
PMID:28901254	(2018) Therapeutics and Immunoprophylaxis Against Noroviruses and Rotaviruses: The Past, Present, and Future.	2	14	0.0016	ENSGALP00000015286,ENSGALP00000043092	TLR3,TLR5
PMID:28924207	(2017) Novel ecto-tagged integrins reveal their trafficking in live cells.	2	14	0.0016	ENSGALP00000000518,ENSGALP00000012130	ITGB2,ITGB3
PMID:28930661	(2017) IL-1 Family Cytokines Use Distinct Molecular Mechanisms to Signal through Their Shared Co-receptor.	2	14	0.0016	ENSGALP00000027049,ENSGALP00000042597	IL1R1,MYD88
PMID:28966796	(2016) Probiotics and Innate and Adaptive Immune Responses in Premature Infants.	2	14	0.0016	ENSGALP00000011319,ENSGALP00000038134	TLR2-2,TLR4
PMID:29119972	(2017) Rotavirus infection.	2	14	0.0016	ENSGALP00000042597,ENSGALP00000043092	MYD88,TLR3
PMID:29181381	(2017) Impact of Dietary Galacto-Oligosaccharide (GOS) on Chicken's Gut Microbiota, Mucosal Gene Expression, and Salmonella Colonization.	2	14	0.0016	ENSGALP00000011319,ENSGALP00000042597	MYD88,TLR4
PMID:29880757	(2018) Comparison of Porcine Airway and Intestinal Epithelial Cell Lines for the Susceptibility and Expression of Pattern Recognition Receptors upon Influenza Virus Infection.	2	14	0.0016	ENSGALP00000035830,ENSGALP00000043092	TLR3,TLR7
PMID:30736473	(2019) Inhibitory Effects of Antimicrobial Peptide JH-3 on Salmonella enterica Serovar Typhimurium Strain CVCC541 Infection-Induced Inflammatory Cytokine Release and Apoptosis in RAW264.7 Cells.	2	14	0.0016	ENSGALP00000011319,ENSGALP00000038134	TLR2-2,TLR4
PMID:30873157	(2019) Advances and Challenges in Understanding Cerebral Toxoplasmosis.	2	14	0.0016	ENSGALP00000042597,ENSGALP00000043092	MYD88,TLR3
PMID:31824481	(2019) Characterization of the Dynamic Behavior of Neutrophils Following Influenza Vaccination.	2	14	0.0016	ENSGALP00000042597,ENSGALP00000043092	MYD88,TLR3
PMID:32075044	(2020) Association of SPOP Expression with the Immune Response to Salmonella Infection in Chickens.	2	14	0.0016	ENSGALP00000011319,ENSGALP00000042597	MYD88,TLR4
PMID:32359610	(2020) Effects of thermal manipulation of eggs on the response of jejunal mucosae to posthatch chronic heat stress in broiler chickens.	2	14	0.0016	ENSGALP00000011319,ENSGALP00000038134	TLR2-2,TLR4
PMID:19457108	(2009) Ethanol inhibits L1 cell adhesion molecule tyrosine phosphorylation and dephosphorylation and activation of pp60(src).	2	15	0.0018	ENSGALP00000011319,ENSGALP00000024180	FYN,TLR4
PMID:19710456	(2009) TLR3-stimulated dendritic cells up-regulate B7-H1 expression and influence the magnitude of CD8 T cell responses to tumor vaccination.	2	15	0.0018	ENSGALP00000011319,ENSGALP00000043092	TLR3,TLR4
PMID:20656925	(2010) The migration of T cells in response to influenza virus is altered in neonatal mice.	2	15	0.0018	ENSGALP00000012130,ENSGALP00000042597	ITGB2,MYD88
PMID:20707909	(2010) Deep sequencing-based transcriptome profiling analysis of bacteria-challenged Lateolabrax japonicus reveals insight into the immune-relevant genes in marine fish.	3	79	0.0018	ENSGALP00000012873,ENSGALP00000041692,ENSGALP00000042597	MYD88,TRAF6,VAV1
PMID:20811486	(2010) Review on Trypanosoma cruzi: Host Cell Interaction.	2	15	0.0018	ENSGALP00000011319,ENSGALP00000038134	TLR2-2,TLR4
PMID:20825428	(2011) Dendritic cell and T cell responses in children with food allergy.	2	15	0.0018	ENSGALP00000011319,ENSGALP00000035870	IL7,TLR4
PMID:21423173	(2011) ATP11C is critical for the internalization of phosphatidylserine and differentiation of B lymphocytes.	2	15	0.0018	ENSGALP00000035870,ENSGALP00000041692	IL7,VAV1
PMID:21469130	(2011) Role of CLIC4 in the host innate responses to bacterial lipopolysaccharide.	2	15	0.0018	ENSGALP00000038134,ENSGALP00000043092	TLR2-2,TLR3
PMID:21826229	(2011) Host cytokine responses of pigeons infected with highly pathogenic Thai avian influenza viruses of subtype H5N1 isolated from wild birds.	2	15	0.0018	ENSGALP00000042597,ENSGALP00000043092	MYD88,TLR3
PMID:22123863	(2011) Casein kinase I delta controls centrosome positioning during T cell activation.	2	15	0.0018	ENSGALP00000024180,ENSGALP00000041692	FYN,VAV1
PMID:22357865	(2012) Integrin Beta1 signals through Arg to regulate postnatal dendritic arborization, synapse density, and behavior.	2	15	0.0018	ENSGALP00000000518,ENSGALP00000012130	ITGB2,ITGB3
PMID:22763012	(2012) ILK: a pseudokinase in the center stage of cell-matrix adhesion and signaling.	2	15	0.0018	ENSGALP00000000518,ENSGALP00000012130	ITGB2,ITGB3
PMID:23056350	(2012) The primacy of Beta1 integrin activation in the metastatic cascade.	2	15	0.0018	ENSGALP00000000518,ENSGALP00000012130	ITGB2,ITGB3
PMID:23077406	(2012) Gene therapy in animal models of autosomal dominant retinitis pigmentosa.	2	15	0.0018	ENSGALP00000035830,ENSGALP00000043092	TLR3,TLR7
PMID:23405061	(2013) A critical role for MAPK signalling pathways in the transcriptional regulation of toll like receptors.	2	15	0.0018	ENSGALP00000013260,ENSGALP00000042597	MYD88,TLR15
PMID:23852582	(2013) RNA-based tools for nuclear reprogramming and lineage-conversion: towards clinical applications.	2	15	0.0018	ENSGALP00000035830,ENSGALP00000043092	TLR3,TLR7
PMID:23861783	(2013) Lipocalin-2 expressed in innate immune cells is an endogenous inhibitor of inflammation in murine nephrotoxic serum nephritis.	2	15	0.0018	ENSGALP00000038134,ENSGALP00000043092	TLR2-2,TLR3
PMID:24019553	(2013) Targeting antigens to CD180 rapidly induces antigen-specific IgG, affinity maturation, and immunological memory.	2	15	0.0018	ENSGALP00000011319,ENSGALP00000035830	TLR4,TLR7
PMID:24244595	(2013) The specificity of targeted vaccines for APC surface molecules influences the immune response phenotype.	2	15	0.0018	ENSGALP00000015286,ENSGALP00000035830	TLR5,TLR7
PMID:24349212	(2013) In vivo and in vitro characterization of the immune stimulating activity of the Neisserial porin PorB.	2	15	0.0018	ENSGALP00000011319,ENSGALP00000042597	MYD88,TLR4
PMID:24742951	(2014) Effects of virulent and attenuated transmissible gastroenteritis virus on the ability of porcine dendritic cells to sample and present antigen.	2	15	0.0018	ENSGALP00000011319,ENSGALP00000038134	TLR2-2,TLR4
PMID:25594173	(2015) Variation in the human immune system is largely driven by non-heritable influences.	2	15	0.0018	ENSGALP00000035870,ENSGALP00000042597	IL7,MYD88
PMID:25816776	(2015) RNase L activates the NLRP3 inflammasome during viral infections.	2	15	0.0018	ENSGALP00000035830,ENSGALP00000043092	TLR3,TLR7
PMID:25865256	(2015) Exosomal sorting of the viral oncoprotein LMP1 is restrained by TRAF2 association at signalling endosomes.	2	15	0.0018	ENSGALP00000012873,ENSGALP00000024180	FYN,TRAF6
PMID:26046638	(2015) IRF-5-Mediated Inflammation Limits CD8+ T Cell Expansion by Inducing HIF-1Alfa and Impairing Dendritic Cell Functions during Leishmania Infection.	2	15	0.0018	ENSGALP00000035830,ENSGALP00000042597	MYD88,TLR7
PMID:26106433	(2015) Propolis: A Complex Natural Product with a Plethora of Biological Activities That Can Be Explored for Drug Development.	2	15	0.0018	ENSGALP00000011319,ENSGALP00000038134	TLR2-2,TLR4
PMID:26237589	(2015) Influenza A Virus Infection, Innate Immunity, and Childhood.	2	15	0.0018	ENSGALP00000035830,ENSGALP00000043092	TLR3,TLR7
PMID:26761025	(2016) The Influenza Virus H5N1 Infection Can Induce ROS Production for Viral Replication and Host Cell Death in A549 Cells Modulated by Human CuZn Superoxide Dismutase (SOD1) Overexpression.	2	15	0.0018	ENSGALP00000011319,ENSGALP00000012873	TLR4,TRAF6
PMID:26858964	(2016) Targeted approaches to induce immune tolerance for Pompe disease therapy.	2	15	0.0018	ENSGALP00000023991,ENSGALP00000042597	ITGA2,MYD88
PMID:26975566	(2016) Newcastle disease virus infection in chicken embryonic fibroblasts but not duck embryonic fibroblasts is associated with elevated host innate immune response.	2	15	0.0018	ENSGALP00000035830,ENSGALP00000043092	TLR3,TLR7
PMID:27321907	(2016) RIPK3 Activates Parallel Pathways of MLKL-Driven Necroptosis and FADD-Mediated Apoptosis to Protect against Influenza A Virus.	2	15	0.0018	ENSGALP00000042597,ENSGALP00000043092	MYD88,TLR3
PMID:28322972	(2017) Potential role of CYP1B1 in the development and treatment of metabolic diseases.	2	15	0.0018	ENSGALP00000027049,ENSGALP00000040720	IL1R1,TBXA2R
PMID:28484702	(2017) Expression Dynamics of Innate Immunity in Influenza Virus-Infected Swine.	2	15	0.0018	ENSGALP00000035830,ENSGALP00000043092	TLR3,TLR7
PMID:28614378	(2017) Comparative analysis of virus-host interactions caused by a virulent and an attenuated duck hepatitis A virus genotype 1.	2	15	0.0018	ENSGALP00000035830,ENSGALP00000043092	TLR3,TLR7
PMID:28837629	(2017) Effects of subconjunctival administration of anti-high mobility group box 1 on dry eye in a mouse model of Sjoegren's syndrome.	2	15	0.0018	ENSGALP00000011319,ENSGALP00000038134	TLR2-2,TLR4
PMID:29079779	(2017) Reference gene selection for gene expression study in shell gland and spleen of laying hens challenged with infectious bronchitis virus.	2	15	0.0018	ENSGALP00000035830,ENSGALP00000035870	IL7,TLR7
PMID:29276511	(2017) Generation and Functional In Vitro Analysis of Semliki Forest Virus Vectors Encoding TNF-Alfa and IFN-Gamma.	2	15	0.0018	ENSGALP00000035830,ENSGALP00000038134	TLR2-2,TLR7
PMID:29698529	(2018) Nucleated red blood cells: Immune cell mediators of the antiviral response.	2	15	0.0018	ENSGALP00000035830,ENSGALP00000043092	TLR3,TLR7
PMID:30158114	(2018) TLR5 decoy receptor as a novel anti-amyloid therapeutic for Alzheimer's disease.	2	15	0.0018	ENSGALP00000011319,ENSGALP00000038134	TLR2-2,TLR4
PMID:30450338	(2018) Innate Immune Response of Primary Human Keratinocytes to West Nile Virus Infection and Its Modulation by Mosquito Saliva.	2	15	0.0018	ENSGALP00000035830,ENSGALP00000043092	TLR3,TLR7
PMID:30693019	(2018) Detection of Selection Signatures Among Brazilian, Sri Lankan, and Egyptian Chicken Populations Under Different Environmental Conditions.	2	15	0.0018	ENSGALP00000035830,ENSGALP00000043092	TLR3,TLR7
PMID:30778066	(2019) HIV-1 vaccination by needle-free oral injection induces strong mucosal immunity and protects against SHIV challenge.	2	15	0.0018	ENSGALP00000011319,ENSGALP00000035830	TLR4,TLR7
PMID:30987344	(2019) Exopolysaccharide-Producing Bifidobacterium adolescentis Strains with Similar Adhesion Property Induce Differential Regulation of Inflammatory Immune Response in TregTh17 Axis of DSS-Colitis Mice.	2	15	0.0018	ENSGALP00000011319,ENSGALP00000042597	MYD88,TLR4
PMID:31470606	(2019) Alpha-1-Antitrypsin Ameliorates Pristane Induced Diffuse Alveolar Hemorrhage in Mice.	2	15	0.0018	ENSGALP00000011319,ENSGALP00000035830	TLR4,TLR7
PMID:31623059	(2019) Identification of an Interferon-Stimulated Long Noncoding RNA (LncRNA ISR) Involved in Regulation of Influenza A Virus Replication.	2	15	0.0018	ENSGALP00000035830,ENSGALP00000043092	TLR3,TLR7
PMID:31947687	(2020) Effect of Inflammation on Female Gonadotropin-Releasing Hormone (GnRH) Neurons: Mechanisms and Consequences.	2	15	0.0018	ENSGALP00000011319,ENSGALP00000038134	TLR2-2,TLR4
PMID:11514605	(2001) T cell development and T cell responses in mice with mutations affecting tyrosines 292 or 315 of the ZAP-70 protein tyrosine kinase.	2	16	0.0019	ENSGALP00000024180,ENSGALP00000041692	FYN,VAV1
PMID:15024049	(2004) A B cell receptor with two Igalpha cytoplasmic domains supports development of mature but anergic B cells.	2	16	0.0019	ENSGALP00000024180,ENSGALP00000041692	FYN,VAV1
PMID:20496149	(2010) The 23rd International Mammalian Genome Conference meeting report.	2	16	0.0019	ENSGALP00000011319,ENSGALP00000042597	MYD88,TLR4
PMID:20510733	(2010) AID and somatic hypermutation.	2	16	0.0019	ENSGALP00000011319,ENSGALP00000035830	TLR4,TLR7
PMID:21453807	(2011) Pathophysiology of food allergy.	2	16	0.0019	ENSGALP00000011319,ENSGALP00000035870	IL7,TLR4
PMID:21910579	(2011) New molecular insights into inflammatory bowel disease-induced diarrhea.	2	16	0.0019	ENSGALP00000011319,ENSGALP00000015286	TLR4,TLR5
PMID:22048770	(2011) Virally-induced upregulation of heparan sulfate on B cells via the action of type I IFN.	2	16	0.0019	ENSGALP00000011319,ENSGALP00000035870	IL7,TLR4
PMID:22916014	(2012) Encephalomyocarditis virus viroporin 2B activates NLRP3 inflammasome.	2	16	0.0019	ENSGALP00000035830,ENSGALP00000043092	TLR3,TLR7
PMID:23164698	(2013) Diet-induced obesity alters the differentiation potential of stem cells isolated from bone marrow, adipose tissue and infrapatellar fat pad: the effects of free fatty acids.	2	16	0.0019	ENSGALP00000011319,ENSGALP00000042597	MYD88,TLR4
PMID:23209417	(2012) Neutrophil-derived IL-1Beta is sufficient for abscess formation in immunity against Staphylococcus aureus in mice.	2	16	0.0019	ENSGALP00000038134,ENSGALP00000042597	MYD88,TLR2-2
PMID:23281368	(2013) Monovalent and multivalent ligation of the B cell receptor exhibit differential dependence upon Syk and Src family kinases.	2	16	0.0019	ENSGALP00000024180,ENSGALP00000041692	FYN,VAV1
PMID:23843081	(2014) The neuroimmune response to West Nile virus.	2	16	0.0019	ENSGALP00000035830,ENSGALP00000043092	TLR3,TLR7
PMID:24197130	(2014) Doxorubicin eliminates myeloid-derived suppressor cells and enhances the efficacy of adoptive T-cell transfer in breast cancer.	2	16	0.0019	ENSGALP00000023991,ENSGALP00000035870	IL7,ITGA2
PMID:25252955	(2014) Effective innate and adaptive antimelanoma immunity through localized TLR78 activation.	2	16	0.0019	ENSGALP00000035830,ENSGALP00000042597	MYD88,TLR7
PMID:25774716	(2015) Guanylate-binding proteins promote activation of the AIM2 inflammasome during infection with Francisella novicida.	2	16	0.0019	ENSGALP00000038134,ENSGALP00000042597	MYD88,TLR2-2
PMID:26121977	(2015) Lipopolysaccharide significantly influences the hepatic triglyceride metabolism in growing pigs.	2	16	0.0019	ENSGALP00000011319,ENSGALP00000038134	TLR2-2,TLR4
PMID:26402906	(2015) Differences in Susceptibility to Heat Stress along the Chicken Intestine and the Protective Effects of Galacto-Oligosaccharides.	2	16	0.0019	ENSGALP00000011319,ENSGALP00000038134	TLR2-2,TLR4
PMID:26631690	(2015) TLR-3 stimulation improves anti-tumor immunity elicited by dendritic cell exosome-based vaccines in a murine model of melanoma.	2	16	0.0019	ENSGALP00000011319,ENSGALP00000043092	TLR3,TLR4
PMID:27250970	(2016) Surfactant proteins, SP-A and SP-D, in respiratory fungal infections: their role in the inflammatory response.	2	16	0.0019	ENSGALP00000011319,ENSGALP00000038134	TLR2-2,TLR4
PMID:27259252	(2016) Virus-stimulated neutrophils in the tumor microenvironment enhance T cell-mediated anti-tumor immunity.	2	16	0.0019	ENSGALP00000011319,ENSGALP00000043092	TLR3,TLR4
PMID:27282619	(2016) Osteopontin regulates proliferation, apoptosis, and migration of murine claudin-low mammary tumor cells.	2	16	0.0019	ENSGALP00000000518,ENSGALP00000004173	ITGAV,ITGB3
PMID:27357231	(2016) The LXR ligand GW3965 inhibits Newcastle disease virus infection by affecting cholesterol homeostasis.	2	16	0.0019	ENSGALP00000011319,ENSGALP00000042597	MYD88,TLR4
PMID:27780588	(2017) The non-mammalian MIF superfamily.	2	16	0.0019	ENSGALP00000011319,ENSGALP00000038134	TLR2-2,TLR4
PMID:28106157	(2017) TLR4 antagonist FP7 inhibits LPS-induced cytokine production and glycolytic reprogramming in dendritic cells, and protects mice from lethal influenza infection.	2	16	0.0019	ENSGALP00000042597,ENSGALP00000043092	MYD88,TLR3
PMID:28852164	(2017) Genome-wide DNA methylation and transcriptome analyses reveal genes involved in immune responses of pig peripheral blood mononuclear cells to poly I:C.	2	16	0.0019	ENSGALP00000012873,ENSGALP00000043092	TLR3,TRAF6
PMID:28854748	(2017) Pattern recognition receptor genes expression profiling in indigenous chickens of India and White Leghorn.	2	16	0.0019	ENSGALP00000035830,ENSGALP00000043092	TLR3,TLR7
PMID:29137226	(2017) The neglected avian hepatotropic virus induces acute and chronic hepatitis in ducks: an alternative model for hepatology.	2	16	0.0019	ENSGALP00000035830,ENSGALP00000043092	TLR3,TLR7
PMID:29167521	(2017) DNA methylation in silkworm genome may provide insights into epigenetic regulation of response to Bombyx mori cypovirus infection.	2	16	0.0019	ENSGALP00000000518,ENSGALP00000012130	ITGB2,ITGB3
PMID:29207540	(2017) Herpesvirus and Autophagy: 'All Right, Everybody Be Cool, This Is a Robbery!'	2	16	0.0019	ENSGALP00000038134,ENSGALP00000042597	MYD88,TLR2-2
PMID:29330323	(2018) IL-10 Deficiency Reveals a Role for TLR2-Dependent Bystander Activation of T Cells in Lyme Arthritis.	2	16	0.0019	ENSGALP00000035830,ENSGALP00000038134	TLR2-2,TLR7
PMID:29706970	(2018) H7N9 Avian Influenza Virus Is Efficiently Transmissible and Induces an Antibody Response in Chickens.	2	16	0.0019	ENSGALP00000035830,ENSGALP00000043092	TLR3,TLR7
PMID:30853215	(2019) Energetic Trade-Offs and Hypometabolic States Promote Disease Tolerance.	2	16	0.0019	ENSGALP00000011319,ENSGALP00000042597	MYD88,TLR4
PMID:31585000	(2019) Induction of PGRN by influenza virus inhibits the antiviral immune responses through downregulation of type I interferons signaling.	2	16	0.0019	ENSGALP00000012873,ENSGALP00000042597	MYD88,TRAF6
PMID:19375457	(2009) Applications of high-throughput genomics to antiviral research: evasion of antiviral responses and activation of inflammation during fulminant RNA virus infection.	2	17	0.0021	ENSGALP00000011319,ENSGALP00000043092	TLR3,TLR4
PMID:20107606	(2010) Melanoma differentiation-associated gene 5 (MDA5) is involved in the innate immune response to Paramyxoviridae infection in vivo.	2	17	0.0021	ENSGALP00000035830,ENSGALP00000043092	TLR3,TLR7
PMID:21390053	(2011) State of the union between metabolism and the immune system in type 2 diabetes.	2	17	0.0021	ENSGALP00000011319,ENSGALP00000038134	TLR2-2,TLR4
PMID:22470514	(2012) Systemic treatment with CpG-B after sublethal rickettsial infection induces mouse death through indoleamine 2,3-dioxygenase (IDO).	2	17	0.0021	ENSGALP00000011319,ENSGALP00000038134	TLR2-2,TLR4
PMID:22500137	(2011) Dengue and soluble mediators of the innate immune system.	2	17	0.0021	ENSGALP00000035830,ENSGALP00000043092	TLR3,TLR7
PMID:22661089	(2012) Myeloid dendritic cells from B6.NZM Sle1Sle2Sle3 lupus-prone mice express an IFN signature that precedes disease onset.	2	17	0.0021	ENSGALP00000011319,ENSGALP00000035830	TLR4,TLR7
PMID:22916253	(2012) Characterization of chicken thrombocyte responses to Toll-like receptor ligands.	2	17	0.0021	ENSGALP00000011319,ENSGALP00000035830	TLR4,TLR7
PMID:23209944	(2012) Development of safer gene delivery systems to minimize the risk of insertional mutagenesis-related malignancies: a critical issue for the field of gene therapy.	2	17	0.0021	ENSGALP00000035870,ENSGALP00000041692	IL7,VAV1
PMID:23540650	(2013) Antigen cross-presentation by dendritic cell subsets: one general or all sergeants?	2	17	0.0021	ENSGALP00000035830,ENSGALP00000043092	TLR3,TLR7
PMID:23684848	(2013) Use of ex vivo and in vitro cultures of the human respiratory tract to study the tropism and host responses of highly pathogenic avian influenza A (H5N1) and other influenza viruses.	2	17	0.0021	ENSGALP00000035830,ENSGALP00000043092	TLR3,TLR7
PMID:23891718	(2014) Mechanisms of talin-dependent integrin signaling and crosstalk.	2	17	0.0021	ENSGALP00000000518,ENSGALP00000012130	ITGB2,ITGB3
PMID:25445351	(2015) Infectious pancreatic necrosis virus proteins VP2, VP3, VP4 and VP5 antagonize IFNa1 promoter activation while VP1 induces IFNa1.	2	17	0.0021	ENSGALP00000035830,ENSGALP00000043092	TLR3,TLR7
PMID:25861024	(2015) Induction of microglia activation after infection with the non-neurotropic ACA042009 H1N1 influenza virus.	2	17	0.0021	ENSGALP00000011319,ENSGALP00000043092	TLR3,TLR4
PMID:25946076	(2015) The Role of Reactive Oxygen Species (ROS) in the Formation of Extracellular Traps (ETs) in Humans.	2	17	0.0021	ENSGALP00000011319,ENSGALP00000037001	RAC2,TLR4
PMID:26026061	(2015) Dendritic Cell-Based Vaccines that Utilize Myeloid Rather than Plasmacytoid Cells Offer a Superior Survival Advantage in Malignant Glioma.	2	17	0.0021	ENSGALP00000035830,ENSGALP00000042597	MYD88,TLR7
PMID:26092469	(2015) Interleukin-33 and Interferon-Gamma Counter-Regulate Group 2 Innate Lymphoid Cell Activation during Immune Perturbation.	2	17	0.0021	ENSGALP00000035870,ENSGALP00000042597	IL7,MYD88
PMID:26294279	(2016) Molecular basis of hypohidrotic ectodermal dysplasia: an update.	2	17	0.0021	ENSGALP00000012873,ENSGALP00000042597	MYD88,TRAF6
PMID:26311905	(2015) PI3KDelta Regulates the Magnitude of CD8+ T Cell Responses after Challenge with Listeria monocytogenes.	2	17	0.0021	ENSGALP00000023991,ENSGALP00000038134	ITGA2,TLR2-2
PMID:26885373	(2016) Monomeric annexin A2 is an oxygen-regulated toll-like receptor 2 ligand and adjuvant.	2	17	0.0021	ENSGALP00000011319,ENSGALP00000035830	TLR4,TLR7
PMID:27141827	(2016) Double-stranded RNA analog and type I interferon regulate expression of Trem paired receptors in murine myeloid cells.	2	17	0.0021	ENSGALP00000038134,ENSGALP00000043092	TLR2-2,TLR3
PMID:27223301	(2016) Deletion of A44L, A46R and C12L Vaccinia Virus Genes from the MVA Genome Improved the Vector Immunogenicity by Modifying the Innate Immune Response Generating Enhanced and Optimized Specific T-Cell Responses.	2	17	0.0021	ENSGALP00000038134,ENSGALP00000042597	MYD88,TLR2-2
PMID:27876778	(2016) Differential fecal microbiota are retained in broiler chicken lines divergently selected for fatness traits.	2	17	0.0021	ENSGALP00000011319,ENSGALP00000015286	TLR4,TLR5
PMID:27929072	(2016) Antimicrobial growth promoters modulate host responses in mice with a defined intestinal microbiota.	2	17	0.0021	ENSGALP00000011319,ENSGALP00000038134	TLR2-2,TLR4
PMID:28659358	(2017) B Cell-Extrinsic Myd88 and Fcer1g Negatively Regulate Autoreactive and Normal B Cell Immune Responses.	2	17	0.0021	ENSGALP00000035830,ENSGALP00000042597	MYD88,TLR7
PMID:28676421	(2017) How cells channel their stress: Interplay between Piezo1 and the cytoskeleton.	2	17	0.0021	ENSGALP00000000518,ENSGALP00000012130	ITGB2,ITGB3
PMID:29292038	(2018) Targeting superoxide dismutase to endothelial caveolae profoundly alleviates inflammation caused by endotoxin.	2	17	0.0021	ENSGALP00000011319,ENSGALP00000043092	TLR3,TLR4
PMID:29476080	(2018) Profiling Atlantic salmon B cell populations: CpG-mediated TLR-ligation enhances IgM secretion and modulates immune gene expression.	2	17	0.0021	ENSGALP00000038134,ENSGALP00000043092	TLR2-2,TLR3
PMID:29556219	(2018) Integrated Lung and Tracheal mRNA-Seq and miRNA-Seq Analysis of Dogs with an Avian-Like H5N1 Canine Influenza Virus Infection.	2	17	0.0021	ENSGALP00000011319,ENSGALP00000012873	TLR4,TRAF6
PMID:29597266	(2018) The In Ovo Feeding Administration (Gallus Gallus)-An Emerging In Vivo Approach to Assess Bioactive Compounds with Potential Nutritional Benefits.	2	17	0.0021	ENSGALP00000011319,ENSGALP00000038134	TLR2-2,TLR4
PMID:30116287	(2018) Dietary vitamin D3 supplementation protects laying hens against lipopolysaccharide-induced immunological stress.	2	17	0.0021	ENSGALP00000011319,ENSGALP00000038134	TLR2-2,TLR4
PMID:30231933	(2018) Pathobiology of Avian avulavirus 1: special focus on waterfowl.	2	17	0.0021	ENSGALP00000035830,ENSGALP00000043092	TLR3,TLR7
PMID:30941145	(2019) Fish Autophagy Protein 5 Exerts Negative Regulation on Antiviral Immune Response Against Iridovirus and Nodavirus.	2	17	0.0021	ENSGALP00000012873,ENSGALP00000042597	MYD88,TRAF6
PMID:30984757	(2019) Avian Primordial Germ Cells Contribute to and Interact With the Extracellular Matrix During Early Migration.	2	17	0.0021	ENSGALP00000004173,ENSGALP00000023991	ITGA2,ITGAV
PMID:31678455	(2019) Transcriptome analysis of MAPK signaling pathway and associated genes to angiogenesis in chicken erythrocytes on response to thiram-induced tibial lesions.	2	17	0.0021	ENSGALP00000027049,ENSGALP00000037001	IL1R1,RAC2
PMID:31681256	(2019) The Complex Association of FcgammaRIIb With Autoimmune Susceptibility.	2	17	0.0021	ENSGALP00000035830,ENSGALP00000042597	MYD88,TLR7
PMID:31773065	(2019) Central regulation of breast cancer growth and metastasis.	2	17	0.0021	ENSGALP00000011319,ENSGALP00000042597	MYD88,TLR4
PMID:9922457	(1999) Dissociation of FAKp130(CAS)c-Src complex during mitosis: role of mitosis-specific serine phosphorylation of FAK.	2	17	0.0021	ENSGALP00000000518,ENSGALP00000012130	ITGB2,ITGB3
PMID:10085297	(1999) PonsinSH3P12: an l-afadin- and vinculin-binding protein localized at cell-cell and cell-matrix adherens junctions.	2	18	0.0023	ENSGALP00000000518,ENSGALP00000012130	ITGB2,ITGB3
PMID:11121431	(2000) Nischarin, a novel protein that interacts with the integrin alpha5 subunit and inhibits cell migration.	2	18	0.0023	ENSGALP00000000518,ENSGALP00000012130	ITGB2,ITGB3
PMID:18551190	(2008) Antigen-induced immunomodulation in the pathogenesis of atherosclerosis.	2	18	0.0023	ENSGALP00000011319,ENSGALP00000038134	TLR2-2,TLR4
PMID:18768834	(2008) Plasmacytoid dendritic cells take up opsonized antigen leading to CD4+ and CD8+ T cell activation in vivo.	2	18	0.0023	ENSGALP00000011319,ENSGALP00000035830	TLR4,TLR7
PMID:19852809	(2009) Nme protein family evolutionary history, a vertebrate perspective.	2	18	0.0023	ENSGALP00000000518,ENSGALP00000012130	ITGB2,ITGB3
PMID:20005845	(2009) The pseudoactive site of ILK is essential for its binding to alpha-Parvin and localization to focal adhesions.	2	18	0.0023	ENSGALP00000000518,ENSGALP00000012130	ITGB2,ITGB3
PMID:20442418	(2010) In vivo identification of regulators of cell invasion across basement membranes.	2	18	0.0023	ENSGALP00000000518,ENSGALP00000012130	ITGB2,ITGB3
PMID:20622891	(2010) Murine lung eosinophil activation and chemokine production in allergic airway inflammation.	2	18	0.0023	ENSGALP00000011319,ENSGALP00000038134	TLR2-2,TLR4
PMID:22136929	(2011) Erythroidmyeloid progenitors and hematopoietic stem cells originate from distinct populations of endothelial cells.	2	18	0.0023	ENSGALP00000035870,ENSGALP00000041692	IL7,VAV1
PMID:22817987	(2012) Mucosal reactive oxygen species decrease virulence by disrupting Campylobacter jejuni phosphotyrosine signaling.	2	18	0.0023	ENSGALP00000011319,ENSGALP00000038134	TLR2-2,TLR4
PMID:23226468	(2012) Cytosolic, autocrine alpha-1 proteinase inhibitor (A1PI) inhibits caspase-1 and blocks IL-1Beta dependent cytokine release in monocytes.	2	18	0.0023	ENSGALP00000011319,ENSGALP00000042597	MYD88,TLR4
PMID:23555801	(2013) BANK1 and BLK act through phospholipase C gamma 2 in B-cell signaling.	2	18	0.0023	ENSGALP00000024180,ENSGALP00000041692	FYN,VAV1
PMID:23609496	(2013) Melatonin: buffering the immune system.	2	18	0.0023	ENSGALP00000011319,ENSGALP00000043092	TLR3,TLR4
PMID:23829904	(2013) Toxoplasmosis.	2	18	0.0023	ENSGALP00000011319,ENSGALP00000038134	TLR2-2,TLR4
PMID:23874555	(2013) Transcriptome analysis and discovery of genes involved in immune pathways from hepatopancreas of microbial challenged mitten crab Eriocheir sinensis.	2	18	0.0023	ENSGALP00000012873,ENSGALP00000042597	MYD88,TRAF6
PMID:24189062	(2014) Inhibition of p38 mitogen-activated protein kinase impairs influenza virus-induced primary and secondary host gene responses and protects mice from lethal H5N1 infection.	2	18	0.0023	ENSGALP00000011319,ENSGALP00000042597	MYD88,TLR4
PMID:24503091	(2014) Subcapsular sinus macrophages limit dissemination of West Nile virus particles after inoculation but are not essential for the development of West Nile virus-specific T cell responses.	2	18	0.0023	ENSGALP00000035830,ENSGALP00000043092	TLR3,TLR7
PMID:24904586	(2014) Plasmacytoid Dendritic Cells: Neglected Regulators of the Immune Response to Staphylococcus aureus.	2	18	0.0023	ENSGALP00000035830,ENSGALP00000042597	MYD88,TLR7
PMID:24979752	(2014) Dynamic expression of BCL6 in murine conventional dendritic cells during in vivo development and activation.	2	18	0.0023	ENSGALP00000011319,ENSGALP00000042597	MYD88,TLR4
PMID:25398130	(2014) S. mansoni bolsters anti-viral immunity in the murine respiratory tract.	2	18	0.0023	ENSGALP00000011319,ENSGALP00000038134	TLR2-2,TLR4
PMID:25611393	(2015) Loss of anchorage primarily induces non-apoptotic cell death in a human mammary epithelial cell line under atypical focal adhesion kinase signaling.	2	18	0.0023	ENSGALP00000000518,ENSGALP00000012130	ITGB2,ITGB3
PMID:25637020	(2015) Cell-autonomous sex differences in gene expression in chicken bone marrow-derived macrophages.	2	18	0.0023	ENSGALP00000011319,ENSGALP00000042597	MYD88,TLR4
PMID:26013676	(2015) Cellular microRNA miR-26a suppresses replication of porcine reproductive and respiratory syndrome virus by activating innate antiviral immunity.	2	18	0.0023	ENSGALP00000042597,ENSGALP00000043092	MYD88,TLR3
PMID:27445824	(2016) Anti-Cancer Properties of the Naturally Occurring Aphrodisiacs: Icariin and Its Derivatives.	2	18	0.0023	ENSGALP00000011319,ENSGALP00000042597	MYD88,TLR4
PMID:27819292	(2016) Saponin-based adjuvants induce cross-presentation in dendritic cells by intracellular lipid body formation.	2	18	0.0023	ENSGALP00000011319,ENSGALP00000042597	MYD88,TLR4
PMID:28163697	(2016) Lethal Experimental Tick-Borne Encephalitis Infection: Influence of Two Strains with Similar Virulence on the Immune Response.	2	18	0.0023	ENSGALP00000035830,ENSGALP00000043092	TLR3,TLR7
PMID:28178282	(2017) Trypanosoma cruzi High Mobility Group B (TcHMGB) can act as an inflammatory mediator on mammalian cells.	2	18	0.0023	ENSGALP00000011319,ENSGALP00000038134	TLR2-2,TLR4
PMID:28790362	(2017) Double-stranded RNA induces chicken T-cell lymphoma apoptosis by TRIF and NF-KB.	2	18	0.0023	ENSGALP00000012873,ENSGALP00000043092	TLR3,TRAF6
PMID:29615560	(2017) Sonic -'Jack-of-All-Trades' in Neural Circuit Formation.	2	18	0.0023	ENSGALP00000020572,ENSGALP00000024180	FYN,PTCH1
PMID:29935172	(2018) Nutraceuticals in colorectal cancer: A mechanistic approach.	2	18	0.0023	ENSGALP00000011319,ENSGALP00000038134	TLR2-2,TLR4
PMID:30060764	(2018) Phytochemicals as antibiotic alternatives to promote growth and enhance host health.	2	18	0.0023	ENSGALP00000015286,ENSGALP00000043092	TLR3,TLR5
PMID:30172933	(2018) Engineering DNA vaccines against infectious diseases.	2	18	0.0023	ENSGALP00000038134,ENSGALP00000043092	TLR2-2,TLR3
PMID:30367047	(2018) Non-catalytic signaling by pseudokinase ILK for regulating cell adhesion.	2	18	0.0023	ENSGALP00000000518,ENSGALP00000012130	ITGB2,ITGB3
PMID:30678299	(2019) Macrophages from Susceptible and Resistant Chicken Lines have Different Transcriptomes following Marek's Disease Virus Infection.	3	90	0.0023	ENSGALP00000011319,ENSGALP00000013260,ENSGALP00000043092	TLR15,TLR3,TLR4
PMID:31636623	(2019) Factors Affecting the Tissue Damaging Consequences of Viral Infections.	2	18	0.0023	ENSGALP00000015286,ENSGALP00000038134	TLR2-2,TLR5
PMID:31700623	(2019) Immunostimulants in respiratory diseases: focus on Pidotimod.	2	18	0.0023	ENSGALP00000011319,ENSGALP00000038134	TLR2-2,TLR4
PMID:32172398	(2020) Probiotics mitigating subclinical necrotic enteritis (SNE) as potential alternatives to antibiotics in poultry.	2	18	0.0023	ENSGALP00000038134,ENSGALP00000042597	MYD88,TLR2-2
PMID:20482552	(2010) Evasion of innate and adaptive immune responses by influenza A virus.	2	19	0.0025	ENSGALP00000035830,ENSGALP00000043092	TLR3,TLR7
PMID:21106256	(2011) Intracellular transport of Toxoplasma gondii through the blood-brain barrier.	2	19	0.0025	ENSGALP00000011319,ENSGALP00000038134	TLR2-2,TLR4
PMID:21920463	(2011) Alcoholic liver disease: pathogenesis and new therapeutic targets.	2	19	0.0025	ENSGALP00000011319,ENSGALP00000042597	MYD88,TLR4
PMID:22229971	(2012) Biology and pathogenesis of Acanthamoeba.	2	19	0.0025	ENSGALP00000011319,ENSGALP00000042597	MYD88,TLR4
PMID:22316382	(2012) Measles virus, immune control, and persistence.	2	19	0.0025	ENSGALP00000035830,ENSGALP00000042597	MYD88,TLR7
PMID:23049531	(2012) Follicular dendritic cells in health and disease.	2	19	0.0025	ENSGALP00000011319,ENSGALP00000042597	MYD88,TLR4
PMID:23468527	(2013) Two modes of integrin activation form a binary molecular switch in adhesion maturation.	2	19	0.0025	ENSGALP00000000518,ENSGALP00000012130	ITGB2,ITGB3
PMID:24155889	(2013) Loss of DAP12 and FcRGamma drives exaggerated IL-12 production and CD8(+) T cell response by CCR2(+) Mo-DCs.	2	19	0.0025	ENSGALP00000041692,ENSGALP00000042597	MYD88,VAV1
PMID:24832799	(2013) Antitumor Virotherapy by Attenuated Measles Virus (MV).	2	19	0.0025	ENSGALP00000035830,ENSGALP00000043092	TLR3,TLR7
PMID:24942690	(2014) Immunity to gastrointestinal nematodes: mechanisms and myths.	2	19	0.0025	ENSGALP00000011319,ENSGALP00000042597	MYD88,TLR4
PMID:24970121	(2011) Comparative studies of vertebrate Beta integrin genes and proteins: ancient genes in vertebrate evolution.	2	19	0.0025	ENSGALP00000000518,ENSGALP00000012130	ITGB2,ITGB3
PMID:25749629	(2015) RIG-I in RNA virus recognition.	2	19	0.0025	ENSGALP00000035830,ENSGALP00000043092	TLR3,TLR7
PMID:25762200	(2015) Vimentin regulates activation of the NLRP3 inflammasome.	2	19	0.0025	ENSGALP00000027049,ENSGALP00000042597	IL1R1,MYD88
PMID:27574501	(2016) Follicular Helper T (Tfh) Cells in Autoimmune Diseases and Allograft Rejection.	2	19	0.0025	ENSGALP00000035830,ENSGALP00000042597	MYD88,TLR7
PMID:27579619	(2016) IKBZeta: an emerging player in cancer.	2	19	0.0025	ENSGALP00000012873,ENSGALP00000042597	MYD88,TRAF6
PMID:27622065	(2016) Interferon alpha bioactivity critically depends on Scavenger receptor class B type I function.	2	19	0.0025	ENSGALP00000011319,ENSGALP00000038134	TLR2-2,TLR4
PMID:28717359	(2017) The C-Terminal Effector Domain of Non-Structural Protein 1 of Influenza A Virus Blocks IFN-Beta Production by Targeting TNF Receptor-Associated Factor 3.	2	19	0.0025	ENSGALP00000012873,ENSGALP00000035830	TLR7,TRAF6
PMID:29507527	(2018) Critical Roles of IL-33ST2 Pathway in Neurological Disorders.	2	19	0.0025	ENSGALP00000012873,ENSGALP00000042597	MYD88,TRAF6
PMID:29988381	(2018) Anti-Allergic Inflammatory Activity of Interleukin-37 Is Mediated by Novel Signaling Cascades in Human Eosinophils.	2	19	0.0025	ENSGALP00000024180,ENSGALP00000043092	FYN,TLR3
PMID:30245627	(2018) Raging the War Against Inflammation With Natural Products.	2	19	0.0025	ENSGALP00000011319,ENSGALP00000042597	MYD88,TLR4
PMID:30463912	(2018) The multi-faceted role of Gata3 in developmental haematopoiesis.	2	19	0.0025	ENSGALP00000035870,ENSGALP00000041692	IL7,VAV1
PMID:30845208	(2019) Coincident airway exposure to low-potency allergen and cytomegalovirus sensitizes for allergic airway disease by viral activation of migratory dendritic cells.	2	19	0.0025	ENSGALP00000035830,ENSGALP00000042597	MYD88,TLR7
PMID:30902922	(2019) Endothelial-to-haematopoietic transition: an update on the process of making blood.	2	19	0.0025	ENSGALP00000011319,ENSGALP00000042597	MYD88,TLR4
PMID:31403401	(2019) Defined neuronal populations drive fatal phenotype in a mouse model of Leigh syndrome.	2	19	0.0025	ENSGALP00000035830,ENSGALP00000038134	TLR2-2,TLR7
PMID:31533211	(2019) MicroRNAs in Ocular Infection.	2	19	0.0025	ENSGALP00000027049,ENSGALP00000035830	IL1R1,TLR7
PMID:32168884	(2020) The Role of Tissue-resident T Cells in Stress Surveillance and Tissue Maintenance.	2	19	0.0025	ENSGALP00000035870,ENSGALP00000042597	IL7,MYD88
PMID:32201497	(2018) Post-translational modifications of coronavirus proteins: roles and function.	2	19	0.0025	ENSGALP00000012873,ENSGALP00000035830	TLR7,TRAF6
PMID:18710924	(2008) Novel role of the muskelin-RanBP9 complex as a nucleocytoplasmic mediator of cell morphology regulation.	2	20	0.0027	ENSGALP00000000518,ENSGALP00000012130	ITGB2,ITGB3
PMID:19597499	(2009) Themis controls thymocyte selection through regulation of T cell antigen receptor-mediated signaling.	2	20	0.0027	ENSGALP00000024180,ENSGALP00000041692	FYN,VAV1
PMID:20536569	(2010) Effect of NKG2D ligand expression on host immune responses.	2	20	0.0027	ENSGALP00000041692,ENSGALP00000042597	MYD88,VAV1
PMID:20647499	(2010) The role of NELL-1, a growth factor associated with craniosynostosis, in promoting bone regeneration.	2	20	0.0027	ENSGALP00000000518,ENSGALP00000012130	ITGB2,ITGB3
PMID:20676366	(2010) Gene expression profiling of the local cecal response of genetic chicken lines that differ in their susceptibility to Campylobacter jejuni colonization.	2	20	0.0027	ENSGALP00000035830,ENSGALP00000035870	IL7,TLR7
PMID:21573782	(2011) Protecting the boundary: the sentinel role of host defense peptides in the skin.	2	20	0.0027	ENSGALP00000011319,ENSGALP00000038134	TLR2-2,TLR4
PMID:21613614	(2011) Netting neutrophils induce endothelial damage, infiltrate tissues, and expose immunostimulatory molecules in systemic lupus erythematosus.	2	20	0.0027	ENSGALP00000011319,ENSGALP00000035830	TLR4,TLR7
PMID:22238658	(2012) The prolyl isomerase Pin1 modulates development of CD8+ cDC in mice.	2	20	0.0027	ENSGALP00000011319,ENSGALP00000035830	TLR4,TLR7
PMID:22309668	(2012) Technologies for enhanced efficacy of DNA vaccines.	2	20	0.0027	ENSGALP00000011319,ENSGALP00000042597	MYD88,TLR4
PMID:22391299	(2012) Noncanonical Hedgehog signaling.	2	20	0.0027	ENSGALP00000020572,ENSGALP00000024180	FYN,PTCH1
PMID:22672517	(2012) The adapter protein ADAP is required for selected dendritic cell functions.	2	20	0.0027	ENSGALP00000011319,ENSGALP00000042597	MYD88,TLR4
PMID:23420881	(2013) TCR-driven transendothelial migration of human effector memory CD4 T cells involves Vav, Rac, and myosin IIA.	2	20	0.0027	ENSGALP00000024180,ENSGALP00000041692	FYN,VAV1
PMID:23799000	(2013) CD40 gene silencing reduces the progression of experimental lupus nephritis modulating local milieu and systemic mechanisms.	2	20	0.0027	ENSGALP00000011319,ENSGALP00000043092	TLR3,TLR4
PMID:23851690	(2013) Induction of activation-induced cytidine deaminase-targeting adaptor 14-3-3Gamma is mediated by NF-KB-dependent recruitment of CFP1 to the 5'-CpG-3'-rich 14-3-3Gamma promoter and is sustained by E2A.	2	20	0.0027	ENSGALP00000011319,ENSGALP00000035830	TLR4,TLR7
PMID:24004508	(2013) Arsenic immunotoxicity: a review.	2	20	0.0027	ENSGALP00000011319,ENSGALP00000035870	IL7,TLR4
PMID:24907343	(2014) Themis2 is not required for B cell development, activation, and antibody responses.	2	20	0.0027	ENSGALP00000011319,ENSGALP00000041692	TLR4,VAV1
PMID:25281754	(2014) Innate receptors and cellular defense against pulmonary infections.	2	20	0.0027	ENSGALP00000011319,ENSGALP00000038134	TLR2-2,TLR4
PMID:26637810	(2015) Saikosaponin A inhibits influenza A virus replication and lung immunopathology.	2	20	0.0027	ENSGALP00000035830,ENSGALP00000043092	TLR3,TLR7
PMID:26795247	(2016) A Temporal Switch in the Germinal Center Determines Differential Output of Memory B and Plasma Cells.	2	20	0.0027	ENSGALP00000011319,ENSGALP00000035830	TLR4,TLR7
PMID:26840831	(2016) The Effect of Divergence in Feed Efficiency on the Intestinal Microbiota and the Intestinal Immune Response in Both Unchallenged and Lipopolysaccharide Challenged Ileal and Colonic Explants.	2	20	0.0027	ENSGALP00000011319,ENSGALP00000038134	TLR2-2,TLR4
PMID:27827855	(2016) The Peculiar Characteristics of Fish Type I Interferons.	2	20	0.0027	ENSGALP00000035830,ENSGALP00000043092	TLR3,TLR7
PMID:28418930	(2017) The innate immunity of guinea pigs against highly pathogenic avian influenza virus infection.	2	20	0.0027	ENSGALP00000035830,ENSGALP00000043092	TLR3,TLR7
PMID:28536351	(2017) Oncolytic Vesicular Stomatitis Virus as a Viro-Immunotherapy: Defeating Cancer with a 'Hammer' and 'Anvil'.	2	20	0.0027	ENSGALP00000035830,ENSGALP00000042597	MYD88,TLR7
PMID:29213275	(2017) Dynamic Changes in Host Gene Expression following In Vitro Viral Mimic Stimulation in Crocodile Cells.	2	20	0.0027	ENSGALP00000042597,ENSGALP00000043092	MYD88,TLR3
PMID:31293593	(2019) Editorial: The Mononuclear Phagocyte System in Infectious Disease.	2	20	0.0027	ENSGALP00000011319,ENSGALP00000035830	TLR4,TLR7
PMID:31404395	(2019) Integrins in disguise - mechanosensors in Saccharomyces cerevisiae as functional integrin analogues.	2	20	0.0027	ENSGALP00000000518,ENSGALP00000012130	ITGB2,ITGB3
PMID:11807098	(2002) Different splice variants of filamin-B affect myogenesis, subcellular distribution, and determine binding to integrin [beta] subunits.	2	21	0.0029	ENSGALP00000000518,ENSGALP00000012130	ITGB2,ITGB3
PMID:17517123	(2007) Comparative sequence analysis of leucine-rich repeats (LRRs) within vertebrate toll-like receptors.	2	21	0.0029	ENSGALP00000013260,ENSGALP00000038134	TLR15,TLR2-2
PMID:17998397	(2007) Myc stimulates B lymphocyte differentiation and amplifies calcium signaling.	2	21	0.0029	ENSGALP00000024180,ENSGALP00000035870	FYN,IL7
PMID:18837980	(2008) The role of positive selection in determining the molecular cause of species differences in disease.	2	21	0.0029	ENSGALP00000004173,ENSGALP00000012130	ITGAV,ITGB2
PMID:20332049	(2010) Enhanced antigen uptake by dendritic cells induced by the B pentamer of the type II heat-labile enterotoxin LT-IIa requires engagement of TLR2.	2	21	0.0029	ENSGALP00000011319,ENSGALP00000038134	TLR2-2,TLR4
PMID:21162652	(2011) Stimulation of anti-tumor immunity by photodynamic therapy.	2	21	0.0029	ENSGALP00000011319,ENSGALP00000043092	TLR3,TLR4
PMID:21506647	(2011) CpG DNA as a vaccine adjuvant.	2	21	0.0029	ENSGALP00000012873,ENSGALP00000042597	MYD88,TRAF6
PMID:21508982	(2011) Illuminating viral infections in the nervous system.	2	21	0.0029	ENSGALP00000038134,ENSGALP00000043092	TLR2-2,TLR3
PMID:21510883	(2011) A highly selective, orally active inhibitor of Janus kinase 2, CEP-33779, ablates disease in two mouse models of rheumatoid arthritis.	2	21	0.0029	ENSGALP00000024180,ENSGALP00000041692	FYN,VAV1
PMID:21909336	(2011) Influenza-induced innate immunity: regulators of viral replication, respiratory tract pathology &amp; adaptive immunity.	2	21	0.0029	ENSGALP00000035830,ENSGALP00000043092	TLR3,TLR7
PMID:22531916	(2012) Pituitary adenylate cyclase-activating peptide and vasoactive intestinal polypeptide bias Langerhans cell Ag presentation toward Th17 cells.	2	21	0.0029	ENSGALP00000023991,ENSGALP00000038134	ITGA2,TLR2-2
PMID:22577894	(2012) Fast skeletal muscle transcriptome of the gilthead sea bream (Sparus aurata) determined by next generation sequencing.	2	21	0.0029	ENSGALP00000000518,ENSGALP00000012130	ITGB2,ITGB3
PMID:22844448	(2012) Neisseria gonorrhoeae suppresses dendritic cell-induced, antigen-dependent CD4 T cell proliferation.	2	21	0.0029	ENSGALP00000011319,ENSGALP00000038134	TLR2-2,TLR4
PMID:22899927	(2012) Orthopoxvirus genes that mediate disease virulence and host tropism.	2	21	0.0029	ENSGALP00000012873,ENSGALP00000042597	MYD88,TRAF6
PMID:24416654	(2013) Redox regulation of Janus kinase: The elephant in the room.	2	21	0.0029	ENSGALP00000024180,ENSGALP00000035870	FYN,IL7
PMID:25309333	(2014) Roles of Rac1 and Rac3 GTPases during the development of cortical and hippocampal GABAergic interneurons.	2	21	0.0029	ENSGALP00000037001,ENSGALP00000038832	GIT1,RAC2
PMID:25582403	(2015) Hyaluronan fragments as mediators of inflammation in allergic pulmonary disease.	2	21	0.0029	ENSGALP00000011319,ENSGALP00000038134	TLR2-2,TLR4
PMID:25637260	(2015) Risk factors for West Nile virus infection and disease in populations and individuals.	2	21	0.0029	ENSGALP00000027049,ENSGALP00000043092	IL1R1,TLR3
PMID:26216901	(2015) Adhesion to fibronectin regulates Hippo signaling via the FAK-Src-PI3K pathway.	2	21	0.0029	ENSGALP00000004173,ENSGALP00000024180	FYN,ITGAV
PMID:28368006	(2017) Mechanisms of central tolerance for B cells.	2	21	0.0029	ENSGALP00000035830,ENSGALP00000042597	MYD88,TLR7
PMID:28642841	(2017) Strain- and Dose-Dependent Reduction of Toxoplasma gondii Burden in Pigs Is Associated with Interferon-Gamma Production by CD8+ Lymphocytes in a Heterologous Challenge Model.	2	21	0.0029	ENSGALP00000035830,ENSGALP00000042597	MYD88,TLR7
PMID:29215570	(2017) Host Cell Restriction Factors that Limit Influenza A Infection.	2	21	0.0029	ENSGALP00000035830,ENSGALP00000043092	TLR3,TLR7
PMID:29326957	(2017) Characterization of the Phospholipid Platelet-Activating Factor As a Mediator of Inflammation in Chickens.	2	21	0.0029	ENSGALP00000011319,ENSGALP00000042597	MYD88,TLR4
PMID:29375555	(2017) Genomic Region Containing Toll-Like Receptor Genes Has a Major Impact on Total IgM Antibodies Including KLH-Binding IgM Natural Antibodies in Chickens.	2	21	0.0029	ENSGALP00000038134,ENSGALP00000043092	TLR2-2,TLR3
PMID:29587443	(2018) The Horizon of a Therapy for Rare Genetic Diseases: A 'Druggable' Future for Fibrodysplasia Ossificans Progressiva.	2	21	0.0029	ENSGALP00000011319,ENSGALP00000043092	TLR3,TLR4
PMID:30385434	(2018) The role of integrin Beta1 in the heterogeneity of human embryonic stem cells culture.	2	21	0.0029	ENSGALP00000000518,ENSGALP00000012130	ITGB2,ITGB3
PMID:31311959	(2019) Pretreatment with probiotic Enterococcus faecium NCIMB 11181 ameliorates necrotic enteritis-induced intestinal barrier injury in broiler chickens.	2	21	0.0029	ENSGALP00000038134,ENSGALP00000042597	MYD88,TLR2-2
PMID:31312450	(2019) Harnessing host-virus evolution in antiviral therapy and immunotherapy.	2	21	0.0029	ENSGALP00000035830,ENSGALP00000043092	TLR3,TLR7
PMID:31331324	(2019) Celiac disease: a comprehensive current review.	2	21	0.0029	ENSGALP00000011319,ENSGALP00000042597	MYD88,TLR4
PMID:31440162	(2019) An Insight Into the Modulatory Effects and Mechanisms of Action of Phyllanthus Species and Their Bioactive Metabolites on the Immune System.	2	21	0.0029	ENSGALP00000011319,ENSGALP00000042597	MYD88,TLR4
PMID:31660028	(2019) Gut-liver axis signaling in portal hypertension.	2	21	0.0029	ENSGALP00000011319,ENSGALP00000038134	TLR2-2,TLR4
PMID:11514608	(2001) B cell adaptor containing src homology 2 domain (BASH) links B cell receptor signaling to the activation of hematopoietic progenitor kinase 1.	2	22	0.0031	ENSGALP00000024180,ENSGALP00000041692	FYN,VAV1
PMID:20069572	(2010) Tensin 2 modulates cell contractility in 3D collagen gels through the RhoGAP DLC1.	2	22	0.0031	ENSGALP00000000518,ENSGALP00000012130	ITGB2,ITGB3
PMID:20101634	(2010) Integrin signaling through FAK in the regulation of mammary stem cells and breast cancer.	2	22	0.0031	ENSGALP00000000518,ENSGALP00000012130	ITGB2,ITGB3
PMID:20419147	(2010) Genetic analysis of fin development in zebrafish identifies furin and hemicentin1 as potential novel fraser syndrome disease genes.	2	22	0.0031	ENSGALP00000000518,ENSGALP00000012130	ITGB2,ITGB3
PMID:24434318	(2013) Antiviral macrophage responses in flavivirus encephalitis.	2	22	0.0031	ENSGALP00000035830,ENSGALP00000043092	TLR3,TLR7
PMID:24959667	(2014) PB1-F2 attenuates virulence of highly pathogenic avian H5N1 influenza virus in chickens.	2	22	0.0031	ENSGALP00000011319,ENSGALP00000035830	TLR4,TLR7
PMID:25367977	(2014) The immunological synapse.	2	22	0.0031	ENSGALP00000024180,ENSGALP00000041692	FYN,VAV1
PMID:25690795	(2015) Poxviral ankyrin proteins.	2	22	0.0031	ENSGALP00000011319,ENSGALP00000038134	TLR2-2,TLR4
PMID:27069112	(2016) IFN-Gamma receptor and STAT1 signaling in B cells are central to spontaneous germinal center formation and autoimmunity.	2	22	0.0031	ENSGALP00000035830,ENSGALP00000042597	MYD88,TLR7
PMID:27618553	(2016) Evidence of innate lymphoid cell redundancy in humans.	2	22	0.0031	ENSGALP00000023991,ENSGALP00000035870	IL7,ITGA2
PMID:28713557	(2017) Yin and yang of interleukin-17 in host immunity to infection.	2	22	0.0031	ENSGALP00000012873,ENSGALP00000042597	MYD88,TRAF6
PMID:29370535	(2018) Effects of prenatal alcohol exposure (PAE): insights into FASD using mouse models of PAE.	2	22	0.0031	ENSGALP00000020572,ENSGALP00000038134	PTCH1,TLR2-2
PMID:29483904	(2018) Exosomes in Pathogen Infections: A Bridge to Deliver Molecules and Link Functions.	2	22	0.0031	ENSGALP00000038134,ENSGALP00000043092	TLR2-2,TLR3
PMID:29945883	(2018) MEG3-4 is a miRNA decoy that regulates IL-1Beta abundance to initiate and then limit inflammation to prevent sepsis during lung infection.	2	22	0.0031	ENSGALP00000011319,ENSGALP00000038134	TLR2-2,TLR4
PMID:30050833	(2016) Infectious bursal disease virus in poultry: current status and future prospects.	2	22	0.0031	ENSGALP00000035830,ENSGALP00000043092	TLR3,TLR7
PMID:30250466	(2018) Treating Influenza Infection, From Now and Into the Future.	2	22	0.0031	ENSGALP00000042597,ENSGALP00000043092	MYD88,TLR3
PMID:30513644	(2018) Walnut Polyphenol Extract Protects against Fenitrothion-Induced Immunotoxicity in Murine Splenic Lymphocytes.	2	22	0.0031	ENSGALP00000011319,ENSGALP00000042597	MYD88,TLR4
PMID:31940873	(2020) FAK-Dependent Cell Motility and Cell Elongation.	2	22	0.0031	ENSGALP00000024180,ENSGALP00000037001	FYN,RAC2
PMID:19110021	(2009) Human dendritic cell maturation and activation by a heat-killed recombinant yeast (Saccharomyces cerevisiae) vector encoding carcinoembryonic antigen.	2	23	0.0033	ENSGALP00000011319,ENSGALP00000038134	TLR2-2,TLR4
PMID:19765998	(2009) Killing me softly: chlamydial use of proteolysis for evading host defenses.	2	23	0.0033	ENSGALP00000011319,ENSGALP00000038134	TLR2-2,TLR4
PMID:20624380	(2010) Conditional knockout of fibronectin abrogates mouse mammary gland lobuloalveolar differentiation.	2	23	0.0033	ENSGALP00000000518,ENSGALP00000012130	ITGB2,ITGB3
PMID:22404683	(2012) Filamins in mechanosensing and signaling.	2	23	0.0033	ENSGALP00000000518,ENSGALP00000012130	ITGB2,ITGB3
PMID:22529955	(2012) Primary cultures of glomerular parietal epithelial cells or podocytes with proven origin.	2	23	0.0033	ENSGALP00000000518,ENSGALP00000012130	ITGB2,ITGB3
PMID:22805612	(2012) RNA-seq liver transcriptome analysis reveals an activated MHC-I pathway and an inhibited MHC-II pathway at the early stage of vaccine immunization in zebrafish.	2	23	0.0033	ENSGALP00000011319,ENSGALP00000042597	MYD88,TLR4
PMID:24213371	(2014) Reversal of CD8 T-cell-mediated mucocutaneous graft-versus-host-like disease by the JAK inhibitor tofacitinib.	2	23	0.0033	ENSGALP00000035870,ENSGALP00000043092	IL7,TLR3
PMID:24529992	(2014) Vitamin D metabolism, mechanism of action, and clinical applications.	2	23	0.0033	ENSGALP00000004924,ENSGALP00000038134	NCOR2,TLR2-2
PMID:25120539	(2014) Blowing on embers: commensal microbiota and our immune system.	2	23	0.0033	ENSGALP00000011319,ENSGALP00000042597	MYD88,TLR4
PMID:25220891	(2015) RNA-based drugs and vaccines.	2	23	0.0033	ENSGALP00000011319,ENSGALP00000035830	TLR4,TLR7
PMID:28153692	(2017) Chronic demyelination-induced seizures.	2	23	0.0033	ENSGALP00000011319,ENSGALP00000042597	MYD88,TLR4
PMID:28270812	(2017) Borrelia burgdorferi Keeps Moving and Carries on: A Review of Borrelial Dissemination and Invasion.	2	23	0.0033	ENSGALP00000011319,ENSGALP00000042597	MYD88,TLR4
PMID:28869965	(2017) The neuropeptide neuromedin U stimulates innate lymphoid cells and type 2 inflammation.	2	23	0.0033	ENSGALP00000023991,ENSGALP00000035870	IL7,ITGA2
PMID:30323812	(2018) Phosphorylation of TRIM28 Enhances the Expression of IFN-Beta and Proinflammatory Cytokines During HPAIV Infection of Human Lung Epithelial Cells.	2	23	0.0033	ENSGALP00000042597,ENSGALP00000043092	MYD88,TLR3
PMID:30348973	(2018) Cyclophilin J limits inflammation through the blockage of ubiquitin chain sensing.	2	23	0.0033	ENSGALP00000012873,ENSGALP00000042597	MYD88,TRAF6
PMID:30534980	(2019) Deciphering desirable immune responses from disease models with resistant and susceptible chickens.	2	23	0.0033	ENSGALP00000011319,ENSGALP00000043092	TLR3,TLR4
PMID:30890658	(2019) HIPK2 is necessary for type I interferon-mediated antiviral immunity.	2	23	0.0033	ENSGALP00000035830,ENSGALP00000043092	TLR3,TLR7
PMID:31616382	(2019) Post-natal Growth Retardation Associated With Impaired Gut Hormone Profiles, Immune and Antioxidant Function in Pigs.	2	23	0.0033	ENSGALP00000011319,ENSGALP00000042597	MYD88,TLR4
PMID:31632619	(2019) Degradation of tumour stromal hyaluronan by small extracellular vesicle-PH20 stimulates CD103+ dendritic cells and in combination with PD-L1 blockade boosts anti-tumour immunity.	2	23	0.0033	ENSGALP00000011319,ENSGALP00000038134	TLR2-2,TLR4
PMID:31824509	(2019) Involvement of T Cell Immunity in Avian Coccidiosis.	2	23	0.0033	ENSGALP00000011319,ENSGALP00000013260	TLR15,TLR4
PMID:31980634	(2020) Erythroid differentiation regulator-1 induced by microbiota in early life drives intestinal stem cell proliferation and regeneration.	2	23	0.0033	ENSGALP00000011319,ENSGALP00000042597	MYD88,TLR4
PMID:32111837	(2020) Efficient homing of T cells via afferent lymphatics requires mechanical arrest and integrin-supported chemokine guidance.	2	23	0.0033	ENSGALP00000012130,ENSGALP00000041692	ITGB2,VAV1
PMID:17470366	(2006) Highlights of international conference of immunogenomics and immunomics, October 8-12, 2006 Budapest, Hungary.	2	24	0.0035	ENSGALP00000035830,ENSGALP00000038134	TLR2-2,TLR7
PMID:18053128	(2007) An insight into the phylogenetic history of HOX linked gene families in vertebrates.	2	24	0.0035	ENSGALP00000000518,ENSGALP00000012130	ITGB2,ITGB3
PMID:18666225	(2008) Beyond insulin resistance: Innate immunity in nonalcoholic steatohepatitis.	2	24	0.0035	ENSGALP00000011319,ENSGALP00000038134	TLR2-2,TLR4
PMID:21459565	(2011) Rho GTPases as regulators of morphological neuroplasticity.	2	24	0.0035	ENSGALP00000016120,ENSGALP00000037001	RAC2,RAP1B
PMID:22945935	(2012) CYK4 inhibits Rac1-dependent PAK1 and ARHGEF7 effector pathways during cytokinesis.	2	24	0.0035	ENSGALP00000016120,ENSGALP00000038832	GIT1,RAP1B
PMID:22981627	(2012) The future of human DNA vaccines.	2	24	0.0035	ENSGALP00000011319,ENSGALP00000038134	TLR2-2,TLR4
PMID:24333484	(2014) TRIMmunity: the roles of the TRIM E3-ubiquitin ligase family in innate antiviral immunity.	2	24	0.0035	ENSGALP00000011319,ENSGALP00000043092	TLR3,TLR4
[truncated: 250 more rows]

## Sheet: enrichment.Pfam
#term ID	term description	observed gene count	background gene count	false discovery rate	matching proteins in your network (IDs)	matching proteins in your network (labels)
[truncated: 13 more rows]

## Sheet: enrichment.NetworkNeighborAL
#term ID	term description	observed gene count	background gene count	false discovery rate	matching proteins in your network (IDs)	matching proteins in your network (labels)
[truncated: 11 more rows]

[truncated: 4 more sheets: enrichment.Keyword, enrichment.KEGG, enrichment.InterPro, enrichment.Component]
